# Supplementary material for: Hedgehog proteins create a dynamic cholesterol interface
Source: PLoS One. 2021 Feb 25;16(2):e0246814. doi: 10.1371/journal.pone.0246814 (PMC7906309; doi:10.1371/journal.pone.0246814)
Supplement: S3 File — (PDB) [file pone.0246814.s012.pdb]

REMARK    GENERATED BY TRJCONV
TITLE     Title t= 400000.00000 step= 200000000
REMARK    THIS IS A SIMULATION BOX
CRYST1   81.716   81.716  136.255  90.00  90.00  90.00 P 1           1
MODEL        1
ATOM      1  N   SER A 195      39.976  22.737  73.878  1.00  0.00           N
ATOM      2  H1  SER A 195      39.283  21.963  73.926  1.00  0.00           H
ATOM      3  H2  SER A 195      40.942  22.352  73.901  1.00  0.00           H
ATOM      4  H3  SER A 195      39.856  23.279  74.757  1.00  0.00           H
ATOM      5  CA  SER A 195      39.849  23.645  72.649  1.00  0.00           C
ATOM      6  HA  SER A 195      40.534  24.471  72.768  1.00  0.00           H
ATOM      7  CB  SER A 195      38.453  24.153  72.469  1.00  0.00           C
ATOM      8  HB1 SER A 195      38.259  24.508  71.434  1.00  0.00           H
ATOM      9  HB2 SER A 195      37.642  23.440  72.734  1.00  0.00           H
ATOM     10  OG  SER A 195      38.139  25.222  73.306  1.00  0.00           O
ATOM     11  HG1 SER A 195      38.821  25.853  73.064  1.00  0.00           H
ATOM     12  C   SER A 195      40.210  22.844  71.452  1.00  0.00           C
ATOM     13  O   SER A 195      39.876  21.632  71.358  1.00  0.00           O
ATOM     14  N   GLY A 196      40.875  23.334  70.447  1.00  0.00           N
ATOM     15  HN  GLY A 196      40.872  22.706  69.673  1.00  0.00           H
ATOM     16  CA  GLY A 196      41.423  24.637  70.316  1.00  0.00           C
ATOM     17  HA1 GLY A 196      41.780  24.737  69.302  1.00  0.00           H
ATOM     18  HA2 GLY A 196      40.567  25.276  70.474  1.00  0.00           H
ATOM     19  C   GLY A 196      42.608  24.822  71.263  1.00  0.00           C
ATOM     20  O   GLY A 196      42.988  23.928  72.070  1.00  0.00           O
ATOM     21  N   GLS A 197      43.305  25.964  71.132  1.00  0.00           N
ATOM     22  HN  GLS A 197      44.101  26.043  71.727  1.00  0.00           H
ATOM     23  CA  GLS A 197      43.075  27.131  70.297  1.00  0.00           C
ATOM     24  HA1 GLS A 197      42.042  27.313  70.041  1.00  0.00           H
ATOM     25  HA2 GLS A 197      43.542  27.918  70.871  1.00  0.00           H
ATOM     26  C   GLS A 197      43.723  27.048  68.946  1.00  0.00           C
ATOM     27  O   GLS A 197      43.599  25.968  68.278  1.00  0.00           O
ATOM     28  N   MCY A 198      44.170  30.059  65.276  1.00  0.00           N
ATOM     29  HN1 MCY A 198      44.352  30.897  64.687  1.00  0.00           H
ATOM     30  HN2 MCY A 198      43.988  29.298  64.591  1.00  0.00           H
ATOM     31  CA  MCY A 198      45.276  29.665  66.210  1.00  0.00           C
ATOM     32  HA  MCY A 198      45.409  30.454  66.935  1.00  0.00           H
ATOM     33  CB  MCY A 198      44.888  28.361  66.967  1.00  0.00           C
ATOM     34  HB1 MCY A 198      44.367  27.635  66.306  1.00  0.00           H
ATOM     35  HB2 MCY A 198      45.838  27.867  67.261  1.00  0.00           H
ATOM     36  SG  MCY A 198      43.823  28.636  68.330  1.00  0.00           S
ATOM     37  C   MCY A 198      46.654  29.625  65.471  1.00  0.00           C
ATOM     38  O   MCY A 198      46.796  29.616  64.239  1.00  0.00           O
ATOM     39  N   PHE A 199      47.742  29.741  66.312  1.00  0.00           N
ATOM     40  HN  PHE A 199      47.507  30.023  67.239  1.00  0.00           H
ATOM     41  CA  PHE A 199      49.139  29.642  66.068  1.00  0.00           C
ATOM     42  HA  PHE A 199      49.407  29.208  65.116  1.00  0.00           H
ATOM     43  CB  PHE A 199      49.826  31.047  66.305  1.00  0.00           C
ATOM     44  HB1 PHE A 199      49.865  31.282  67.390  1.00  0.00           H
ATOM     45  HB2 PHE A 199      50.885  31.023  65.969  1.00  0.00           H
ATOM     46  CG  PHE A 199      49.286  32.183  65.490  1.00  0.00           C
ATOM     47  CD1 PHE A 199      49.433  32.120  64.091  1.00  0.00           C
ATOM     48  HD1 PHE A 199      49.533  31.120  63.696  1.00  0.00           H
ATOM     49  CE1 PHE A 199      48.969  33.135  63.243  1.00  0.00           C
ATOM     50  HE1 PHE A 199      49.093  32.878  62.201  1.00  0.00           H
ATOM     51  CZ  PHE A 199      48.654  34.393  63.838  1.00  0.00           C
ATOM     52  HZ  PHE A 199      48.316  35.226  63.238  1.00  0.00           H
ATOM     53  CD2 PHE A 199      48.850  33.311  66.139  1.00  0.00           C
ATOM     54  HD2 PHE A 199      48.882  33.466  67.207  1.00  0.00           H
ATOM     55  CE2 PHE A 199      48.468  34.405  65.258  1.00  0.00           C
ATOM     56  HE2 PHE A 199      48.170  35.353  65.681  1.00  0.00           H
ATOM     57  C   PHE A 199      49.706  28.704  67.092  1.00  0.00           C
ATOM     58  O   PHE A 199      49.042  28.382  68.113  1.00  0.00           O
ATOM     59  N   PRO A 200      50.931  28.170  66.876  1.00  0.00           N
ATOM     60  CD  PRO A 200      51.615  28.078  65.597  1.00  0.00           C
ATOM     61  HD1 PRO A 200      51.904  29.080  65.213  1.00  0.00           H
ATOM     62  HD2 PRO A 200      50.903  27.588  64.900  1.00  0.00           H
ATOM     63  CA  PRO A 200      51.719  27.573  67.981  1.00  0.00           C
ATOM     64  HA  PRO A 200      51.185  26.662  68.208  1.00  0.00           H
ATOM     65  CB  PRO A 200      53.079  27.217  67.393  1.00  0.00           C
ATOM     66  HB1 PRO A 200      53.819  27.978  67.720  1.00  0.00           H
ATOM     67  HB2 PRO A 200      53.395  26.225  67.781  1.00  0.00           H
ATOM     68  CG  PRO A 200      52.810  27.195  65.870  1.00  0.00           C
ATOM     69  HG1 PRO A 200      53.664  27.633  65.311  1.00  0.00           H
ATOM     70  HG2 PRO A 200      52.643  26.137  65.577  1.00  0.00           H
ATOM     71  C   PRO A 200      51.880  28.354  69.294  1.00  0.00           C
ATOM     72  O   PRO A 200      51.889  29.591  69.334  1.00  0.00           O
ATOM     73  N   GLY A 201      52.151  27.692  70.403  1.00  0.00           N
ATOM     74  HN  GLY A 201      52.221  26.701  70.313  1.00  0.00           H
ATOM     75  CA  GLY A 201      52.626  28.359  71.693  1.00  0.00           C
ATOM     76  HA1 GLY A 201      52.116  29.297  71.854  1.00  0.00           H
ATOM     77  HA2 GLY A 201      52.660  27.664  72.518  1.00  0.00           H
ATOM     78  C   GLY A 201      54.064  28.825  71.467  1.00  0.00           C
ATOM     79  O   GLY A 201      54.449  29.902  71.895  1.00  0.00           O
ATOM     80  N   SER A 202      54.824  28.139  70.607  1.00  0.00           N
ATOM     81  HN  SER A 202      54.310  27.327  70.343  1.00  0.00           H
ATOM     82  CA  SER A 202      56.278  28.242  70.366  1.00  0.00           C
ATOM     83  HA  SER A 202      56.680  28.779  71.213  1.00  0.00           H
ATOM     84  CB  SER A 202      57.018  26.880  70.512  1.00  0.00           C
ATOM     85  HB1 SER A 202      58.083  27.097  70.279  1.00  0.00           H
ATOM     86  HB2 SER A 202      56.919  26.528  71.561  1.00  0.00           H
ATOM     87  OG  SER A 202      56.440  25.844  69.701  1.00  0.00           O
ATOM     88  HG1 SER A 202      56.753  26.170  68.854  1.00  0.00           H
ATOM     89  C   SER A 202      56.537  28.996  69.139  1.00  0.00           C
ATOM     90  O   SER A 202      57.670  29.014  68.648  1.00  0.00           O
ATOM     91  N   ALA A 203      55.516  29.667  68.681  1.00  0.00           N
ATOM     92  HN  ALA A 203      54.744  29.649  69.311  1.00  0.00           H
ATOM     93  CA  ALA A 203      55.595  30.819  67.767  1.00  0.00           C
ATOM     94  HA  ALA A 203      56.118  30.408  66.915  1.00  0.00           H
ATOM     95  CB  ALA A 203      54.213  31.289  67.403  1.00  0.00           C
ATOM     96  HB1 ALA A 203      53.558  31.519  68.271  1.00  0.00           H
ATOM     97  HB2 ALA A 203      54.115  32.214  66.795  1.00  0.00           H
ATOM     98  HB3 ALA A 203      53.626  30.608  66.751  1.00  0.00           H
ATOM     99  C   ALA A 203      56.266  32.072  68.362  1.00  0.00           C
ATOM    100  O   ALA A 203      56.216  32.412  69.537  1.00  0.00           O
ATOM    101  N   THR A 204      56.863  32.853  67.433  1.00  0.00           N
ATOM    102  HN  THR A 204      56.951  32.446  66.527  1.00  0.00           H
ATOM    103  CA  THR A 204      57.744  34.001  67.918  1.00  0.00           C
ATOM    104  HA  THR A 204      57.751  33.998  68.998  1.00  0.00           H
ATOM    105  CB  THR A 204      59.194  33.922  67.412  1.00  0.00           C
ATOM    106  HB  THR A 204      59.401  33.840  66.324  1.00  0.00           H
ATOM    107  OG1 THR A 204      59.869  32.819  67.990  1.00  0.00           O
ATOM    108  HG1 THR A 204      59.679  32.008  67.513  1.00  0.00           H
ATOM    109  CG2 THR A 204      59.906  35.135  67.941  1.00  0.00           C
ATOM    110 1HG2 THR A 204      60.987  34.901  67.840  1.00  0.00           H
ATOM    111 2HG2 THR A 204      59.647  36.057  67.378  1.00  0.00           H
ATOM    112 3HG2 THR A 204      59.771  35.423  69.005  1.00  0.00           H
ATOM    113  C   THR A 204      57.091  35.274  67.557  1.00  0.00           C
ATOM    114  O   THR A 204      56.578  35.444  66.432  1.00  0.00           O
ATOM    115  N   VAL A 205      56.995  36.240  68.480  1.00  0.00           N
ATOM    116  HN  VAL A 205      57.372  36.112  69.394  1.00  0.00           H
ATOM    117  CA  VAL A 205      56.443  37.546  68.353  1.00  0.00           C
ATOM    118  HA  VAL A 205      56.286  37.789  67.313  1.00  0.00           H
ATOM    119  CB  VAL A 205      55.091  37.650  69.129  1.00  0.00           C
ATOM    120  HB  VAL A 205      54.415  36.994  68.540  1.00  0.00           H
ATOM    121  CG1 VAL A 205      55.154  37.134  70.533  1.00  0.00           C
ATOM    122 1HG1 VAL A 205      55.475  36.080  70.672  1.00  0.00           H
ATOM    123 2HG1 VAL A 205      55.802  37.732  71.210  1.00  0.00           H
ATOM    124 3HG1 VAL A 205      54.202  37.106  71.104  1.00  0.00           H
ATOM    125  CG2 VAL A 205      54.615  39.129  69.108  1.00  0.00           C
ATOM    126 1HG2 VAL A 205      53.577  39.080  69.500  1.00  0.00           H
ATOM    127 2HG2 VAL A 205      55.232  39.775  69.767  1.00  0.00           H
ATOM    128 3HG2 VAL A 205      54.596  39.603  68.103  1.00  0.00           H
ATOM    129  C   VAL A 205      57.437  38.522  68.914  1.00  0.00           C
ATOM    130  O   VAL A 205      58.207  38.213  69.773  1.00  0.00           O
ATOM    131  N   HIS A 206      57.567  39.645  68.290  1.00  0.00           N
ATOM    132  HN  HIS A 206      56.951  39.870  67.539  1.00  0.00           H
ATOM    133  CA  HIS A 206      58.519  40.745  68.508  1.00  0.00           C
ATOM    134  HA  HIS A 206      59.329  40.434  69.152  1.00  0.00           H
ATOM    135  CB  HIS A 206      59.190  41.316  67.175  1.00  0.00           C
ATOM    136  HB1 HIS A 206      58.415  41.871  66.604  1.00  0.00           H
ATOM    137  HB2 HIS A 206      59.908  42.132  67.405  1.00  0.00           H
ATOM    138  ND1 HIS A 206      60.019  40.400  65.038  1.00  0.00           N
ATOM    139  CG  HIS A 206      59.829  40.216  66.435  1.00  0.00           C
ATOM    140  CE1 HIS A 206      60.557  39.266  64.609  1.00  0.00           C
ATOM    141  HE1 HIS A 206      60.931  39.164  63.590  1.00  0.00           H
ATOM    142  NE2 HIS A 206      60.723  38.351  65.601  1.00  0.00           N
ATOM    143  HE2 HIS A 206      61.237  37.493  65.608  1.00  0.00           H
ATOM    144  CD2 HIS A 206      60.278  38.948  66.773  1.00  0.00           C
ATOM    145  HD2 HIS A 206      60.275  38.485  67.753  1.00  0.00           H
ATOM    146  C   HIS A 206      57.745  41.860  69.177  1.00  0.00           C
ATOM    147  O   HIS A 206      56.567  41.971  68.932  1.00  0.00           O
ATOM    148  N   LEU A 207      58.333  42.665  70.061  1.00  0.00           N
ATOM    149  HN  LEU A 207      59.236  42.544  70.466  1.00  0.00           H
ATOM    150  CA  LEU A 207      57.621  43.735  70.777  1.00  0.00           C
ATOM    151  HA  LEU A 207      56.781  44.244  70.327  1.00  0.00           H
ATOM    152  CB  LEU A 207      57.272  43.306  72.284  1.00  0.00           C
ATOM    153  HB1 LEU A 207      58.241  43.172  72.811  1.00  0.00           H
ATOM    154  HB2 LEU A 207      56.720  44.187  72.676  1.00  0.00           H
ATOM    155  CG  LEU A 207      56.557  42.015  72.553  1.00  0.00           C
ATOM    156  HG  LEU A 207      55.777  42.060  71.763  1.00  0.00           H
ATOM    157  CD1 LEU A 207      57.313  40.692  72.500  1.00  0.00           C
ATOM    158 1HD1 LEU A 207      56.485  40.004  72.775  1.00  0.00           H
ATOM    159 2HD1 LEU A 207      57.578  40.255  71.514  1.00  0.00           H
ATOM    160 3HD1 LEU A 207      58.187  40.698  73.186  1.00  0.00           H
ATOM    161  CD2 LEU A 207      55.906  42.141  73.920  1.00  0.00           C
ATOM    162 1HD2 LEU A 207      56.647  42.395  74.707  1.00  0.00           H
ATOM    163 2HD2 LEU A 207      55.028  42.819  73.854  1.00  0.00           H
ATOM    164 3HD2 LEU A 207      55.536  41.111  74.107  1.00  0.00           H
ATOM    165  C   LEU A 207      58.552  44.870  70.872  1.00  0.00           C
ATOM    166  O   LEU A 207      59.760  44.724  70.983  1.00  0.00           O
ATOM    167  N   GLU A 208      57.916  46.058  70.950  1.00  0.00           N
ATOM    168  HN  GLU A 208      56.931  46.202  70.998  1.00  0.00           H
ATOM    169  CA  GLU A 208      58.620  47.259  71.220  1.00  0.00           C
ATOM    170  HA  GLU A 208      58.031  48.156  71.096  1.00  0.00           H
ATOM    171  CB  GLU A 208      59.120  47.249  72.706  1.00  0.00           C
ATOM    172  HB1 GLU A 208      59.871  46.513  73.064  1.00  0.00           H
ATOM    173  HB2 GLU A 208      59.653  48.212  72.853  1.00  0.00           H
ATOM    174  CG  GLU A 208      57.916  47.108  73.661  1.00  0.00           C
ATOM    175  HG1 GLU A 208      57.172  47.874  73.355  1.00  0.00           H
ATOM    176  HG2 GLU A 208      57.393  46.129  73.611  1.00  0.00           H
ATOM    177  CD  GLU A 208      58.184  47.447  75.084  1.00  0.00           C
ATOM    178  OE1 GLU A 208      58.173  48.665  75.447  1.00  0.00           O
ATOM    179  OE2 GLU A 208      58.411  46.560  75.936  1.00  0.00           O
ATOM    180  C   GLU A 208      59.840  47.490  70.308  1.00  0.00           C
ATOM    181  O   GLU A 208      59.926  47.098  69.160  1.00  0.00           O
ATOM    182  N   GLN A 209      60.953  48.118  70.820  1.00  0.00           N
ATOM    183  HN  GLN A 209      60.935  48.623  71.679  1.00  0.00           H
ATOM    184  CA  GLN A 209      62.166  48.249  70.020  1.00  0.00           C
ATOM    185  HA  GLN A 209      61.836  48.417  69.006  1.00  0.00           H
ATOM    186  CB  GLN A 209      62.982  49.466  70.491  1.00  0.00           C
ATOM    187  HB1 GLN A 209      63.335  49.269  71.526  1.00  0.00           H
ATOM    188  HB2 GLN A 209      63.918  49.551  69.898  1.00  0.00           H
ATOM    189  CG  GLN A 209      62.371  50.826  70.294  1.00  0.00           C
ATOM    190  HG1 GLN A 209      61.543  51.009  71.011  1.00  0.00           H
ATOM    191  HG2 GLN A 209      63.202  51.538  70.492  1.00  0.00           H
ATOM    192  CD  GLN A 209      61.868  51.094  68.845  1.00  0.00           C
ATOM    193  OE1 GLN A 209      60.673  51.455  68.620  1.00  0.00           O
ATOM    194  NE2 GLN A 209      62.735  50.919  67.834  1.00  0.00           N
ATOM    195 1HE2 GLN A 209      63.700  50.813  68.074  1.00  0.00           H
ATOM    196 2HE2 GLN A 209      62.419  51.341  66.983  1.00  0.00           H
ATOM    197  C   GLN A 209      63.034  47.048  69.995  1.00  0.00           C
ATOM    198  O   GLN A 209      63.558  46.633  68.931  1.00  0.00           O
ATOM    199  N   GLY A 210      63.247  46.364  71.129  1.00  0.00           N
ATOM    200  HN  GLY A 210      62.866  46.734  71.973  1.00  0.00           H
ATOM    201  CA  GLY A 210      63.971  45.113  71.186  1.00  0.00           C
ATOM    202  HA1 GLY A 210      64.129  44.644  70.226  1.00  0.00           H
ATOM    203  HA2 GLY A 210      64.923  45.304  71.659  1.00  0.00           H
ATOM    204  C   GLY A 210      63.429  43.852  71.925  1.00  0.00           C
ATOM    205  O   GLY A 210      64.099  42.848  72.109  1.00  0.00           O
ATOM    206  N   GLY A 211      62.201  43.935  72.281  1.00  0.00           N
ATOM    207  HN  GLY A 211      61.683  44.750  72.036  1.00  0.00           H
ATOM    208  CA  GLY A 211      61.489  42.879  72.924  1.00  0.00           C
ATOM    209  HA1 GLY A 211      62.038  42.635  73.821  1.00  0.00           H
ATOM    210  HA2 GLY A 211      60.494  43.255  73.110  1.00  0.00           H
ATOM    211  C   GLY A 211      61.213  41.682  72.055  1.00  0.00           C
ATOM    212  O   GLY A 211      60.880  41.803  70.900  1.00  0.00           O
ATOM    213  N   THR A 212      61.252  40.426  72.678  1.00  0.00           N
ATOM    214  HN  THR A 212      61.343  40.448  73.671  1.00  0.00           H
ATOM    215  CA  THR A 212      60.867  39.148  71.984  1.00  0.00           C
ATOM    216  HA  THR A 212      60.094  39.236  71.236  1.00  0.00           H
ATOM    217  CB  THR A 212      62.012  38.561  71.158  1.00  0.00           C
ATOM    218  HB  THR A 212      62.843  38.483  71.891  1.00  0.00           H
ATOM    219  OG1 THR A 212      62.350  39.482  70.135  1.00  0.00           O
ATOM    220  HG1 THR A 212      62.525  40.392  70.386  1.00  0.00           H
ATOM    221  CG2 THR A 212      61.774  37.176  70.679  1.00  0.00           C
ATOM    222 1HG2 THR A 212      62.670  36.621  70.327  1.00  0.00           H
ATOM    223 2HG2 THR A 212      61.392  36.455  71.432  1.00  0.00           H
ATOM    224 3HG2 THR A 212      61.060  37.117  69.829  1.00  0.00           H
ATOM    225  C   THR A 212      60.295  38.197  73.016  1.00  0.00           C
ATOM    226  O   THR A 212      60.806  38.037  74.133  1.00  0.00           O
ATOM    227  N   LYS A 213      59.146  37.617  72.767  1.00  0.00           N
ATOM    228  HN  LYS A 213      58.517  37.825  72.021  1.00  0.00           H
ATOM    229  CA  LYS A 213      58.667  36.537  73.560  1.00  0.00           C
ATOM    230  HA  LYS A 213      59.430  36.113  74.196  1.00  0.00           H
ATOM    231  CB  LYS A 213      57.471  36.967  74.455  1.00  0.00           C
ATOM    232  HB1 LYS A 213      56.570  37.398  73.968  1.00  0.00           H
ATOM    233  HB2 LYS A 213      57.013  36.115  75.002  1.00  0.00           H
ATOM    234  CG  LYS A 213      57.767  38.106  75.512  1.00  0.00           C
ATOM    235  HG1 LYS A 213      58.601  37.630  76.069  1.00  0.00           H
ATOM    236  HG2 LYS A 213      58.092  39.072  75.069  1.00  0.00           H
ATOM    237  CD  LYS A 213      56.596  38.403  76.433  1.00  0.00           C
ATOM    238  HD1 LYS A 213      55.800  38.750  75.740  1.00  0.00           H
ATOM    239  HD2 LYS A 213      56.334  37.423  76.886  1.00  0.00           H
ATOM    240  CE  LYS A 213      57.042  39.475  77.367  1.00  0.00           C
ATOM    241  HE1 LYS A 213      57.902  38.964  77.851  1.00  0.00           H
ATOM    242  HE2 LYS A 213      57.361  40.391  76.825  1.00  0.00           H
ATOM    243  NZ  LYS A 213      56.167  39.808  78.427  1.00  0.00           N
ATOM    244  HZ1 LYS A 213      56.640  40.575  78.946  1.00  0.00           H
ATOM    245  HZ2 LYS A 213      55.243  40.063  78.025  1.00  0.00           H
ATOM    246  HZ3 LYS A 213      56.158  38.967  79.039  1.00  0.00           H
ATOM    247  C   LYS A 213      58.166  35.493  72.634  1.00  0.00           C
ATOM    248  O   LYS A 213      57.877  35.827  71.506  1.00  0.00           O
ATOM    249  N   LEU A 214      58.048  34.239  73.222  1.00  0.00           N
ATOM    250  HN  LEU A 214      58.328  34.168  74.176  1.00  0.00           H
ATOM    251  CA  LEU A 214      57.139  33.177  72.686  1.00  0.00           C
ATOM    252  HA  LEU A 214      57.324  33.202  71.622  1.00  0.00           H
ATOM    253  CB  LEU A 214      57.559  31.808  73.088  1.00  0.00           C
ATOM    254  HB1 LEU A 214      57.402  31.711  74.183  1.00  0.00           H
ATOM    255  HB2 LEU A 214      56.897  31.102  72.542  1.00  0.00           H
ATOM    256  CG  LEU A 214      58.966  31.404  72.621  1.00  0.00           C
ATOM    257  HG  LEU A 214      59.728  32.118  73.002  1.00  0.00           H
ATOM    258  CD1 LEU A 214      59.359  29.994  73.055  1.00  0.00           C
ATOM    259 1HD1 LEU A 214      59.161  29.913  74.145  1.00  0.00           H
ATOM    260 2HD1 LEU A 214      59.021  29.105  72.482  1.00  0.00           H
ATOM    261 3HD1 LEU A 214      60.468  29.990  72.998  1.00  0.00           H
ATOM    262  CD2 LEU A 214      59.057  31.514  71.069  1.00  0.00           C
ATOM    263 1HD2 LEU A 214      58.306  30.824  70.627  1.00  0.00           H
ATOM    264 2HD2 LEU A 214      58.923  32.527  70.634  1.00  0.00           H
ATOM    265 3HD2 LEU A 214      60.031  31.100  70.731  1.00  0.00           H
ATOM    266  C   LEU A 214      55.719  33.546  72.878  1.00  0.00           C
ATOM    267  O   LEU A 214      55.371  34.089  73.856  1.00  0.00           O
ATOM    268  N   VAL A 215      54.780  33.238  71.925  1.00  0.00           N
ATOM    269  HN  VAL A 215      55.065  32.689  71.143  1.00  0.00           H
ATOM    270  CA  VAL A 215      53.368  33.557  72.011  1.00  0.00           C
ATOM    271  HA  VAL A 215      53.327  34.632  72.106  1.00  0.00           H
ATOM    272  CB  VAL A 215      52.815  33.172  70.635  1.00  0.00           C
ATOM    273  HB  VAL A 215      53.334  32.298  70.186  1.00  0.00           H
ATOM    274  CG1 VAL A 215      51.305  33.028  70.580  1.00  0.00           C
ATOM    275 1HG1 VAL A 215      50.795  33.808  71.185  1.00  0.00           H
ATOM    276 2HG1 VAL A 215      50.968  32.996  69.522  1.00  0.00           H
ATOM    277 3HG1 VAL A 215      51.081  31.981  70.875  1.00  0.00           H
ATOM    278  CG2 VAL A 215      53.215  34.295  69.684  1.00  0.00           C
ATOM    279 1HG2 VAL A 215      52.864  34.147  68.641  1.00  0.00           H
ATOM    280 2HG2 VAL A 215      52.828  35.236  70.130  1.00  0.00           H
ATOM    281 3HG2 VAL A 215      54.326  34.312  69.714  1.00  0.00           H
ATOM    282  C   VAL A 215      52.474  33.110  73.172  1.00  0.00           C
ATOM    283  O   VAL A 215      51.557  33.779  73.503  1.00  0.00           O
ATOM    284  N   LYS A 216      52.972  32.029  73.791  1.00  0.00           N
ATOM    285  HN  LYS A 216      53.696  31.517  73.335  1.00  0.00           H
ATOM    286  CA  LYS A 216      52.532  31.555  75.072  1.00  0.00           C
ATOM    287  HA  LYS A 216      51.459  31.517  74.949  1.00  0.00           H
ATOM    288  CB  LYS A 216      53.142  30.099  75.280  1.00  0.00           C
ATOM    289  HB1 LYS A 216      52.714  29.675  76.214  1.00  0.00           H
ATOM    290  HB2 LYS A 216      52.766  29.366  74.535  1.00  0.00           H
ATOM    291  CG  LYS A 216      54.724  30.035  75.410  1.00  0.00           C
ATOM    292  HG1 LYS A 216      55.201  30.270  74.434  1.00  0.00           H
ATOM    293  HG2 LYS A 216      55.023  30.852  76.101  1.00  0.00           H
ATOM    294  CD  LYS A 216      55.254  28.638  75.737  1.00  0.00           C
ATOM    295  HD1 LYS A 216      54.735  28.341  76.673  1.00  0.00           H
ATOM    296  HD2 LYS A 216      55.008  27.968  74.885  1.00  0.00           H
ATOM    297  CE  LYS A 216      56.797  28.415  75.880  1.00  0.00           C
ATOM    298  HE1 LYS A 216      57.181  27.433  76.229  1.00  0.00           H
ATOM    299  HE2 LYS A 216      57.350  28.688  74.956  1.00  0.00           H
ATOM    300  NZ  LYS A 216      57.284  29.466  76.857  1.00  0.00           N
ATOM    301  HZ1 LYS A 216      58.255  29.174  77.088  1.00  0.00           H
ATOM    302  HZ2 LYS A 216      57.270  30.436  76.482  1.00  0.00           H
ATOM    303  HZ3 LYS A 216      56.764  29.445  77.757  1.00  0.00           H
ATOM    304  C   LYS A 216      52.751  32.453  76.188  1.00  0.00           C
ATOM    305  O   LYS A 216      51.951  32.446  77.084  1.00  0.00           O
ATOM    306  N   ASP A 217      53.780  33.292  76.091  1.00  0.00           N
ATOM    307  HN  ASP A 217      54.376  33.336  75.293  1.00  0.00           H
ATOM    308  CA  ASP A 217      54.342  33.937  77.257  1.00  0.00           C
ATOM    309  HA  ASP A 217      54.142  33.391  78.167  1.00  0.00           H
ATOM    310  CB  ASP A 217      55.898  33.990  77.080  1.00  0.00           C
ATOM    311  HB1 ASP A 217      56.156  34.292  76.042  1.00  0.00           H
ATOM    312  HB2 ASP A 217      56.310  34.701  77.828  1.00  0.00           H
ATOM    313  CG  ASP A 217      56.535  32.645  77.396  1.00  0.00           C
ATOM    314  OD1 ASP A 217      56.106  31.967  78.307  1.00  0.00           O
ATOM    315  OD2 ASP A 217      57.432  32.228  76.621  1.00  0.00           O
ATOM    316  C   ASP A 217      53.865  35.395  77.421  1.00  0.00           C
ATOM    317  O   ASP A 217      54.292  36.156  78.290  1.00  0.00           O
ATOM    318  N   LEU A 218      53.137  35.984  76.469  1.00  0.00           N
ATOM    319  HN  LEU A 218      52.975  35.537  75.592  1.00  0.00           H
ATOM    320  CA  LEU A 218      52.619  37.340  76.492  1.00  0.00           C
ATOM    321  HA  LEU A 218      53.455  38.020  76.420  1.00  0.00           H
ATOM    322  CB  LEU A 218      51.721  37.486  75.251  1.00  0.00           C
ATOM    323  HB1 LEU A 218      51.133  36.545  75.298  1.00  0.00           H
ATOM    324  HB2 LEU A 218      51.108  38.410  75.317  1.00  0.00           H
ATOM    325  CG  LEU A 218      52.344  37.549  73.866  1.00  0.00           C
ATOM    326  HG  LEU A 218      52.954  36.621  73.896  1.00  0.00           H
ATOM    327  CD1 LEU A 218      51.334  37.174  72.796  1.00  0.00           C
ATOM    328 1HD1 LEU A 218      50.918  36.170  73.026  1.00  0.00           H
ATOM    329 2HD1 LEU A 218      50.581  37.964  72.589  1.00  0.00           H
ATOM    330 3HD1 LEU A 218      51.866  36.989  71.839  1.00  0.00           H
ATOM    331  CD2 LEU A 218      53.160  38.850  73.645  1.00  0.00           C
ATOM    332 1HD2 LEU A 218      54.011  38.901  74.359  1.00  0.00           H
ATOM    333 2HD2 LEU A 218      53.564  38.819  72.611  1.00  0.00           H
ATOM    334 3HD2 LEU A 218      52.463  39.713  73.710  1.00  0.00           H
ATOM    335  C   LEU A 218      51.841  37.714  77.790  1.00  0.00           C
ATOM    336  O   LEU A 218      51.155  36.864  78.311  1.00  0.00           O
ATOM    337  N   SER A 219      52.050  38.907  78.404  1.00  0.00           N
ATOM    338  HN  SER A 219      52.606  39.579  77.921  1.00  0.00           H
ATOM    339  CA  SER A 219      51.439  39.395  79.626  1.00  0.00           C
ATOM    340  HA  SER A 219      50.793  38.637  80.043  1.00  0.00           H
ATOM    341  CB  SER A 219      52.431  39.709  80.763  1.00  0.00           C
ATOM    342  HB1 SER A 219      53.047  38.812  80.986  1.00  0.00           H
ATOM    343  HB2 SER A 219      53.140  40.515  80.477  1.00  0.00           H
ATOM    344  OG  SER A 219      51.894  40.204  81.927  1.00  0.00           O
ATOM    345  HG1 SER A 219      51.588  39.457  82.447  1.00  0.00           H
ATOM    346  C   SER A 219      50.598  40.628  79.238  1.00  0.00           C
ATOM    347  O   SER A 219      51.007  41.307  78.301  1.00  0.00           O
ATOM    348  N   PRO A 220      49.384  40.879  79.813  1.00  0.00           N
ATOM    349  CD  PRO A 220      48.819  40.222  81.006  1.00  0.00           C
ATOM    350  HD1 PRO A 220      49.278  40.764  81.860  1.00  0.00           H
ATOM    351  HD2 PRO A 220      49.053  39.136  81.017  1.00  0.00           H
ATOM    352  CA  PRO A 220      48.539  41.981  79.348  1.00  0.00           C
ATOM    353  HA  PRO A 220      48.258  41.841  78.315  1.00  0.00           H
ATOM    354  CB  PRO A 220      47.339  41.994  80.313  1.00  0.00           C
ATOM    355  HB1 PRO A 220      47.539  42.706  81.143  1.00  0.00           H
ATOM    356  HB2 PRO A 220      46.360  42.219  79.840  1.00  0.00           H
ATOM    357  CG  PRO A 220      47.349  40.520  80.756  1.00  0.00           C
ATOM    358  HG1 PRO A 220      46.749  40.402  81.684  1.00  0.00           H
ATOM    359  HG2 PRO A 220      47.031  39.833  79.943  1.00  0.00           H
ATOM    360  C   PRO A 220      49.213  43.359  79.187  1.00  0.00           C
ATOM    361  O   PRO A 220      50.000  43.708  80.059  1.00  0.00           O
ATOM    362  N   GLY A 221      48.921  44.062  78.097  1.00  0.00           N
ATOM    363  HN  GLY A 221      48.135  43.797  77.545  1.00  0.00           H
ATOM    364  CA  GLY A 221      49.658  45.372  77.788  1.00  0.00           C
ATOM    365  HA1 GLY A 221      49.005  45.997  77.196  1.00  0.00           H
ATOM    366  HA2 GLY A 221      49.814  45.875  78.731  1.00  0.00           H
ATOM    367  C   GLY A 221      50.999  45.246  77.165  1.00  0.00           C
ATOM    368  O   GLY A 221      51.822  46.149  77.198  1.00  0.00           O
ATOM    369  N   ASP A 222      51.353  44.054  76.669  1.00  0.00           N
ATOM    370  HN  ASP A 222      50.563  43.449  76.733  1.00  0.00           H
ATOM    371  CA  ASP A 222      52.526  43.710  75.913  1.00  0.00           C
ATOM    372  HA  ASP A 222      53.386  44.220  76.321  1.00  0.00           H
ATOM    373  CB  ASP A 222      52.760  42.138  75.734  1.00  0.00           C
ATOM    374  HB1 ASP A 222      51.737  41.767  75.960  1.00  0.00           H
ATOM    375  HB2 ASP A 222      53.220  41.854  74.764  1.00  0.00           H
ATOM    376  CG  ASP A 222      53.670  41.561  76.839  1.00  0.00           C
ATOM    377  OD1 ASP A 222      53.816  40.342  77.000  1.00  0.00           O
ATOM    378  OD2 ASP A 222      54.314  42.449  77.489  1.00  0.00           O
ATOM    379  C   ASP A 222      52.466  44.324  74.547  1.00  0.00           C
ATOM    380  O   ASP A 222      51.596  44.004  73.729  1.00  0.00           O
ATOM    381  N   ARG A 223      53.351  45.241  74.177  1.00  0.00           N
ATOM    382  HN  ARG A 223      54.130  45.470  74.756  1.00  0.00           H
ATOM    383  CA  ARG A 223      53.302  46.015  72.961  1.00  0.00           C
ATOM    384  HA  ARG A 223      52.236  46.138  72.832  1.00  0.00           H
ATOM    385  CB  ARG A 223      53.960  47.435  73.185  1.00  0.00           C
ATOM    386  HB1 ARG A 223      54.998  47.214  73.513  1.00  0.00           H
ATOM    387  HB2 ARG A 223      53.977  48.059  72.266  1.00  0.00           H
ATOM    388  CG  ARG A 223      53.407  48.339  74.273  1.00  0.00           C
ATOM    389  HG1 ARG A 223      53.438  47.842  75.267  1.00  0.00           H
ATOM    390  HG2 ARG A 223      54.063  49.226  74.408  1.00  0.00           H
ATOM    391  CD  ARG A 223      51.974  48.804  74.093  1.00  0.00           C
ATOM    392  HD1 ARG A 223      51.335  47.930  73.845  1.00  0.00           H
ATOM    393  HD2 ARG A 223      51.475  49.290  74.958  1.00  0.00           H
ATOM    394  NE  ARG A 223      52.007  49.851  73.036  1.00  0.00           N
ATOM    395  HE  ARG A 223      52.974  50.032  72.854  1.00  0.00           H
ATOM    396  CZ  ARG A 223      50.977  50.299  72.364  1.00  0.00           C
ATOM    397  NH1 ARG A 223      49.735  49.956  72.699  1.00  0.00           N
ATOM    398 1HH1 ARG A 223      49.548  49.434  73.531  1.00  0.00           H
ATOM    399 2HH1 ARG A 223      48.917  50.382  72.311  1.00  0.00           H
ATOM    400  NH2 ARG A 223      51.227  51.116  71.421  1.00  0.00           N
ATOM    401 1HH2 ARG A 223      52.177  51.424  71.363  1.00  0.00           H
ATOM    402 2HH2 ARG A 223      50.558  51.664  70.920  1.00  0.00           H
ATOM    403  C   ARG A 223      53.940  45.272  71.730  1.00  0.00           C
ATOM    404  O   ARG A 223      55.015  45.542  71.248  1.00  0.00           O
ATOM    405  N   VAL A 224      53.276  44.200  71.265  1.00  0.00           N
ATOM    406  HN  VAL A 224      52.410  43.949  71.691  1.00  0.00           H
ATOM    407  CA  VAL A 224      53.534  43.442  70.101  1.00  0.00           C
ATOM    408  HA  VAL A 224      54.565  43.129  70.182  1.00  0.00           H
ATOM    409  CB  VAL A 224      52.650  42.143  69.994  1.00  0.00           C
ATOM    410  HB  VAL A 224      52.965  41.524  69.128  1.00  0.00           H
ATOM    411  CG1 VAL A 224      52.843  41.264  71.226  1.00  0.00           C
ATOM    412 1HG1 VAL A 224      53.935  41.177  71.411  1.00  0.00           H
ATOM    413 2HG1 VAL A 224      52.472  41.816  72.115  1.00  0.00           H
ATOM    414 3HG1 VAL A 224      52.312  40.291  71.143  1.00  0.00           H
ATOM    415  CG2 VAL A 224      51.219  42.583  69.788  1.00  0.00           C
ATOM    416 1HG2 VAL A 224      50.756  43.113  70.648  1.00  0.00           H
ATOM    417 2HG2 VAL A 224      50.952  43.197  68.901  1.00  0.00           H
ATOM    418 3HG2 VAL A 224      50.622  41.647  69.828  1.00  0.00           H
ATOM    419  C   VAL A 224      53.506  44.161  68.855  1.00  0.00           C
ATOM    420  O   VAL A 224      52.892  45.193  68.730  1.00  0.00           O
ATOM    421  N   LEU A 225      54.303  43.747  67.832  1.00  0.00           N
ATOM    422  HN  LEU A 225      54.974  43.020  67.955  1.00  0.00           H
ATOM    423  CA  LEU A 225      54.391  44.396  66.528  1.00  0.00           C
ATOM    424  HA  LEU A 225      54.305  45.457  66.709  1.00  0.00           H
ATOM    425  CB  LEU A 225      55.779  44.027  65.852  1.00  0.00           C
ATOM    426  HB1 LEU A 225      56.037  43.027  66.263  1.00  0.00           H
ATOM    427  HB2 LEU A 225      55.638  43.977  64.751  1.00  0.00           H
ATOM    428  CG  LEU A 225      56.869  45.074  65.996  1.00  0.00           C
ATOM    429  HG  LEU A 225      56.359  46.002  65.658  1.00  0.00           H
ATOM    430  CD1 LEU A 225      57.134  45.162  67.454  1.00  0.00           C
ATOM    431 1HD1 LEU A 225      58.059  45.772  67.542  1.00  0.00           H
ATOM    432 2HD1 LEU A 225      56.304  45.656  68.002  1.00  0.00           H
ATOM    433 3HD1 LEU A 225      57.325  44.118  67.781  1.00  0.00           H
ATOM    434  CD2 LEU A 225      58.060  44.773  65.113  1.00  0.00           C
ATOM    435 1HD2 LEU A 225      57.709  44.698  64.061  1.00  0.00           H
ATOM    436 2HD2 LEU A 225      58.736  45.638  65.282  1.00  0.00           H
ATOM    437 3HD2 LEU A 225      58.495  43.796  65.414  1.00  0.00           H
ATOM    438  C   LEU A 225      53.225  43.955  65.706  1.00  0.00           C
ATOM    439  O   LEU A 225      52.783  42.790  65.908  1.00  0.00           O
ATOM    440  N   ALA A 226      52.655  44.860  64.878  1.00  0.00           N
ATOM    441  HN  ALA A 226      53.039  45.780  64.905  1.00  0.00           H
ATOM    442  CA  ALA A 226      51.399  44.768  64.403  1.00  0.00           C
ATOM    443  HA  ALA A 226      51.175  43.735  64.182  1.00  0.00           H
ATOM    444  CB  ALA A 226      50.302  45.235  65.455  1.00  0.00           C
ATOM    445  HB1 ALA A 226      50.237  44.511  66.295  1.00  0.00           H
ATOM    446  HB2 ALA A 226      50.531  46.180  65.993  1.00  0.00           H
ATOM    447  HB3 ALA A 226      49.280  45.333  65.029  1.00  0.00           H
ATOM    448  C   ALA A 226      51.378  45.701  63.209  1.00  0.00           C
ATOM    449  O   ALA A 226      52.380  46.334  62.851  1.00  0.00           O
ATOM    450  N   ALA A 227      50.265  45.800  62.567  1.00  0.00           N
ATOM    451  HN  ALA A 227      49.502  45.300  62.967  1.00  0.00           H
ATOM    452  CA  ALA A 227      50.036  46.780  61.504  1.00  0.00           C
ATOM    453  HA  ALA A 227      50.931  47.369  61.364  1.00  0.00           H
ATOM    454  CB  ALA A 227      49.694  46.046  60.185  1.00  0.00           C
ATOM    455  HB1 ALA A 227      50.583  45.496  59.808  1.00  0.00           H
ATOM    456  HB2 ALA A 227      48.853  45.364  60.434  1.00  0.00           H
ATOM    457  HB3 ALA A 227      49.351  46.698  59.353  1.00  0.00           H
ATOM    458  C   ALA A 227      48.929  47.798  61.691  1.00  0.00           C
ATOM    459  O   ALA A 227      47.910  47.654  62.366  1.00  0.00           O
ATOM    460  N   ASP A 228      49.130  48.986  61.075  1.00  0.00           N
ATOM    461  HN  ASP A 228      50.020  49.178  60.668  1.00  0.00           H
ATOM    462  CA  ASP A 228      48.269  50.112  61.106  1.00  0.00           C
ATOM    463  HA  ASP A 228      47.792  50.013  62.070  1.00  0.00           H
ATOM    464  CB  ASP A 228      49.135  51.358  61.202  1.00  0.00           C
ATOM    465  HB1 ASP A 228      48.532  52.068  61.808  1.00  0.00           H
ATOM    466  HB2 ASP A 228      50.142  51.132  61.612  1.00  0.00           H
ATOM    467  CG  ASP A 228      49.476  52.183  59.950  1.00  0.00           C
ATOM    468  OD1 ASP A 228      49.217  51.810  58.760  1.00  0.00           O
ATOM    469  OD2 ASP A 228      50.040  53.250  60.147  1.00  0.00           O
ATOM    470  C   ASP A 228      47.167  50.049  60.052  1.00  0.00           C
ATOM    471  O   ASP A 228      46.909  49.051  59.324  1.00  0.00           O
ATOM    472  N   ASP A 229      46.348  51.100  59.987  1.00  0.00           N
ATOM    473  HN  ASP A 229      46.564  51.901  60.540  1.00  0.00           H
ATOM    474  CA  ASP A 229      45.152  51.241  59.143  1.00  0.00           C
ATOM    475  HA  ASP A 229      44.462  50.478  59.470  1.00  0.00           H
ATOM    476  CB  ASP A 229      44.578  52.769  59.195  1.00  0.00           C
ATOM    477  HB1 ASP A 229      45.408  53.501  59.092  1.00  0.00           H
ATOM    478  HB2 ASP A 229      43.807  52.894  58.405  1.00  0.00           H
ATOM    479  CG  ASP A 229      43.927  52.902  60.531  1.00  0.00           C
ATOM    480  OD1 ASP A 229      43.601  51.844  61.139  1.00  0.00           O
ATOM    481  OD2 ASP A 229      43.627  54.047  60.981  1.00  0.00           O
ATOM    482  C   ASP A 229      45.508  51.014  57.624  1.00  0.00           C
ATOM    483  O   ASP A 229      44.734  50.361  56.856  1.00  0.00           O
ATOM    484  N   GLN A 230      46.665  51.582  57.203  1.00  0.00           N
ATOM    485  HN  GLN A 230      47.319  52.020  57.814  1.00  0.00           H
ATOM    486  CA  GLN A 230      47.046  51.389  55.772  1.00  0.00           C
ATOM    487  HA  GLN A 230      46.136  51.211  55.218  1.00  0.00           H
ATOM    488  CB  GLN A 230      47.827  52.709  55.288  1.00  0.00           C
ATOM    489  HB1 GLN A 230      48.654  52.869  56.013  1.00  0.00           H
ATOM    490  HB2 GLN A 230      48.290  52.725  54.279  1.00  0.00           H
ATOM    491  CG  GLN A 230      47.001  53.975  55.244  1.00  0.00           C
ATOM    492  HG1 GLN A 230      46.887  54.384  56.270  1.00  0.00           H
ATOM    493  HG2 GLN A 230      47.490  54.829  54.729  1.00  0.00           H
ATOM    494  CD  GLN A 230      45.664  53.859  54.547  1.00  0.00           C
ATOM    495  OE1 GLN A 230      44.629  53.744  55.184  1.00  0.00           O
ATOM    496  NE2 GLN A 230      45.601  53.900  53.167  1.00  0.00           N
ATOM    497 1HE2 GLN A 230      46.380  54.136  52.586  1.00  0.00           H
ATOM    498 2HE2 GLN A 230      44.691  53.767  52.774  1.00  0.00           H
ATOM    499  C   GLN A 230      47.987  50.166  55.566  1.00  0.00           C
ATOM    500  O   GLN A 230      48.182  49.707  54.444  1.00  0.00           O
ATOM    501  N   GLY A 231      48.482  49.577  56.697  1.00  0.00           N
ATOM    502  HN  GLY A 231      48.273  49.905  57.614  1.00  0.00           H
ATOM    503  CA  GLY A 231      49.173  48.239  56.662  1.00  0.00           C
ATOM    504  HA1 GLY A 231      48.780  47.663  57.487  1.00  0.00           H
ATOM    505  HA2 GLY A 231      48.968  47.746  55.723  1.00  0.00           H
ATOM    506  C   GLY A 231      50.669  48.472  56.919  1.00  0.00           C
ATOM    507  O   GLY A 231      51.453  47.673  56.461  1.00  0.00           O
ATOM    508  N   ARG A 232      50.988  49.629  57.530  1.00  0.00           N
ATOM    509  HN  ARG A 232      50.349  50.345  57.800  1.00  0.00           H
ATOM    510  CA  ARG A 232      52.350  50.057  57.816  1.00  0.00           C
ATOM    511  HA  ARG A 232      53.014  49.564  57.121  1.00  0.00           H
ATOM    512  CB  ARG A 232      52.452  51.590  57.650  1.00  0.00           C
ATOM    513  HB1 ARG A 232      51.922  52.100  58.483  1.00  0.00           H
ATOM    514  HB2 ARG A 232      53.495  51.960  57.746  1.00  0.00           H
ATOM    515  CG  ARG A 232      51.873  52.251  56.354  1.00  0.00           C
ATOM    516  HG1 ARG A 232      52.595  52.041  55.536  1.00  0.00           H
ATOM    517  HG2 ARG A 232      50.909  51.796  56.040  1.00  0.00           H
ATOM    518  CD  ARG A 232      51.959  53.826  56.327  1.00  0.00           C
ATOM    519  HD1 ARG A 232      53.000  54.069  56.629  1.00  0.00           H
ATOM    520  HD2 ARG A 232      51.660  54.118  55.297  1.00  0.00           H
ATOM    521  NE  ARG A 232      50.953  54.296  57.337  1.00  0.00           N
ATOM    522  HE  ARG A 232      50.606  53.675  58.040  1.00  0.00           H
ATOM    523  CZ  ARG A 232      50.760  55.564  57.634  1.00  0.00           C
ATOM    524  NH1 ARG A 232      51.013  56.590  56.823  1.00  0.00           N
ATOM    525 1HH1 ARG A 232      51.442  56.429  55.934  1.00  0.00           H
ATOM    526 2HH1 ARG A 232      50.628  57.490  57.025  1.00  0.00           H
ATOM    527  NH2 ARG A 232      50.216  55.765  58.827  1.00  0.00           N
ATOM    528 1HH2 ARG A 232      50.279  54.968  59.429  1.00  0.00           H
ATOM    529 2HH2 ARG A 232      50.178  56.702  59.173  1.00  0.00           H
ATOM    530  C   ARG A 232      52.568  49.605  59.237  1.00  0.00           C
ATOM    531  O   ARG A 232      51.616  49.388  60.071  1.00  0.00           O
ATOM    532  N   LEU A 233      53.828  49.416  59.723  1.00  0.00           N
ATOM    533  HN  LEU A 233      54.441  49.899  59.103  1.00  0.00           H
ATOM    534  CA  LEU A 233      54.232  48.875  61.005  1.00  0.00           C
ATOM    535  HA  LEU A 233      53.733  47.918  61.044  1.00  0.00           H
ATOM    536  CB  LEU A 233      55.737  48.657  60.989  1.00  0.00           C
ATOM    537  HB1 LEU A 233      56.012  48.092  60.073  1.00  0.00           H
ATOM    538  HB2 LEU A 233      56.161  49.682  60.926  1.00  0.00           H
ATOM    539  CG  LEU A 233      56.237  47.873  62.177  1.00  0.00           C
ATOM    540  HG  LEU A 233      55.729  48.267  63.083  1.00  0.00           H
ATOM    541  CD1 LEU A 233      55.857  46.449  62.148  1.00  0.00           C
ATOM    542 1HD1 LEU A 233      54.819  46.307  61.778  1.00  0.00           H
ATOM    543 2HD1 LEU A 233      56.555  45.869  61.506  1.00  0.00           H
ATOM    544 3HD1 LEU A 233      56.076  46.018  63.148  1.00  0.00           H
ATOM    545  CD2 LEU A 233      57.743  48.131  62.420  1.00  0.00           C
ATOM    546 1HD2 LEU A 233      58.268  47.801  61.498  1.00  0.00           H
ATOM    547 2HD2 LEU A 233      57.964  49.195  62.651  1.00  0.00           H
ATOM    548 3HD2 LEU A 233      58.108  47.420  63.192  1.00  0.00           H
ATOM    549  C   LEU A 233      53.764  49.727  62.174  1.00  0.00           C
ATOM    550  O   LEU A 233      53.638  50.950  62.111  1.00  0.00           O
ATOM    551  N   LEU A 234      53.410  49.027  63.296  1.00  0.00           N
ATOM    552  HN  LEU A 234      53.551  48.041  63.357  1.00  0.00           H
ATOM    553  CA  LEU A 234      52.716  49.599  64.468  1.00  0.00           C
ATOM    554  HA  LEU A 234      53.070  50.587  64.721  1.00  0.00           H
ATOM    555  CB  LEU A 234      51.175  49.526  64.201  1.00  0.00           C
ATOM    556  HB1 LEU A 234      51.000  50.245  63.372  1.00  0.00           H
ATOM    557  HB2 LEU A 234      50.741  48.560  63.865  1.00  0.00           H
ATOM    558  CG  LEU A 234      50.341  50.217  65.199  1.00  0.00           C
ATOM    559  HG  LEU A 234      50.403  49.674  66.166  1.00  0.00           H
ATOM    560  CD1 LEU A 234      50.837  51.709  65.505  1.00  0.00           C
ATOM    561 1HD1 LEU A 234      50.064  52.218  66.119  1.00  0.00           H
ATOM    562 2HD1 LEU A 234      51.778  51.787  66.089  1.00  0.00           H
ATOM    563 3HD1 LEU A 234      51.004  52.305  64.583  1.00  0.00           H
ATOM    564  CD2 LEU A 234      48.870  50.097  64.811  1.00  0.00           C
ATOM    565 1HD2 LEU A 234      48.641  50.755  63.946  1.00  0.00           H
ATOM    566 2HD2 LEU A 234      48.590  49.049  64.571  1.00  0.00           H
ATOM    567 3HD2 LEU A 234      48.222  50.429  65.650  1.00  0.00           H
ATOM    568  C   LEU A 234      52.975  48.747  65.717  1.00  0.00           C
ATOM    569  O   LEU A 234      53.173  47.575  65.643  1.00  0.00           O
ATOM    570  N   TYR A 235      52.892  49.272  66.934  1.00  0.00           N
ATOM    571  HN  TYR A 235      52.570  50.212  67.016  1.00  0.00           H
ATOM    572  CA  TYR A 235      52.888  48.573  68.223  1.00  0.00           C
ATOM    573  HA  TYR A 235      53.182  47.537  68.137  1.00  0.00           H
ATOM    574  CB  TYR A 235      53.843  49.186  69.240  1.00  0.00           C
ATOM    575  HB1 TYR A 235      53.446  50.217  69.357  1.00  0.00           H
ATOM    576  HB2 TYR A 235      53.987  48.748  70.251  1.00  0.00           H
ATOM    577  CG  TYR A 235      55.294  49.338  68.726  1.00  0.00           C
ATOM    578  CD1 TYR A 235      56.078  50.412  69.204  1.00  0.00           C
ATOM    579  HD1 TYR A 235      55.785  51.154  69.932  1.00  0.00           H
ATOM    580  CE1 TYR A 235      57.397  50.519  68.675  1.00  0.00           C
ATOM    581  HE1 TYR A 235      58.003  51.383  68.905  1.00  0.00           H
ATOM    582  CZ  TYR A 235      57.777  49.707  67.637  1.00  0.00           C
ATOM    583  OH  TYR A 235      58.981  49.993  66.927  1.00  0.00           O
ATOM    584  HH  TYR A 235      59.517  50.582  67.462  1.00  0.00           H
ATOM    585  CD2 TYR A 235      55.848  48.434  67.839  1.00  0.00           C
ATOM    586  HD2 TYR A 235      55.279  47.608  67.439  1.00  0.00           H
ATOM    587  CE2 TYR A 235      57.061  48.655  67.228  1.00  0.00           C
ATOM    588  HE2 TYR A 235      57.347  48.036  66.391  1.00  0.00           H
ATOM    589  C   TYR A 235      51.422  48.625  68.739  1.00  0.00           C
ATOM    590  O   TYR A 235      50.689  49.586  68.611  1.00  0.00           O
ATOM    591  N   SER A 236      50.931  47.517  69.278  1.00  0.00           N
ATOM    592  HN  SER A 236      51.542  46.751  69.462  1.00  0.00           H
ATOM    593  CA  SER A 236      49.545  47.468  69.755  1.00  0.00           C
ATOM    594  HA  SER A 236      49.186  48.438  70.068  1.00  0.00           H
ATOM    595  CB  SER A 236      48.697  46.713  68.642  1.00  0.00           C
ATOM    596  HB1 SER A 236      48.916  47.199  67.667  1.00  0.00           H
ATOM    597  HB2 SER A 236      48.991  45.654  68.482  1.00  0.00           H
ATOM    598  OG  SER A 236      47.242  46.675  68.904  1.00  0.00           O
ATOM    599  HG1 SER A 236      47.068  47.533  69.299  1.00  0.00           H
ATOM    600  C   SER A 236      49.529  46.586  71.024  1.00  0.00           C
ATOM    601  O   SER A 236      50.397  45.691  71.156  1.00  0.00           O
ATOM    602  N   ASP A 237      48.637  46.797  71.950  1.00  0.00           N
ATOM    603  HN  ASP A 237      47.959  47.522  71.859  1.00  0.00           H
ATOM    604  CA  ASP A 237      48.516  45.991  73.197  1.00  0.00           C
ATOM    605  HA  ASP A 237      49.495  46.017  73.653  1.00  0.00           H
ATOM    606  CB  ASP A 237      47.495  46.658  74.238  1.00  0.00           C
ATOM    607  HB1 ASP A 237      46.526  46.772  73.707  1.00  0.00           H
ATOM    608  HB2 ASP A 237      47.378  46.010  75.133  1.00  0.00           H
ATOM    609  CG  ASP A 237      47.907  48.073  74.709  1.00  0.00           C
ATOM    610  OD1 ASP A 237      49.097  48.385  75.018  1.00  0.00           O
ATOM    611  OD2 ASP A 237      46.946  48.826  74.862  1.00  0.00           O
ATOM    612  C   ASP A 237      48.077  44.596  72.947  1.00  0.00           C
ATOM    613  O   ASP A 237      47.004  44.427  72.411  1.00  0.00           O
ATOM    614  N   PHE A 238      48.772  43.543  73.326  1.00  0.00           N
ATOM    615  HN  PHE A 238      49.715  43.656  73.628  1.00  0.00           H
ATOM    616  CA  PHE A 238      48.172  42.276  73.681  1.00  0.00           C
ATOM    617  HA  PHE A 238      47.566  41.955  72.846  1.00  0.00           H
ATOM    618  CB  PHE A 238      49.305  41.153  73.729  1.00  0.00           C
ATOM    619  HB1 PHE A 238      49.594  40.925  72.681  1.00  0.00           H
ATOM    620  HB2 PHE A 238      50.228  41.644  74.106  1.00  0.00           H
ATOM    621  CG  PHE A 238      48.846  39.900  74.492  1.00  0.00           C
ATOM    622  CD1 PHE A 238      49.069  39.848  75.908  1.00  0.00           C
ATOM    623  HD1 PHE A 238      49.474  40.745  76.353  1.00  0.00           H
ATOM    624  CE1 PHE A 238      48.509  38.757  76.575  1.00  0.00           C
ATOM    625  HE1 PHE A 238      48.592  38.704  77.650  1.00  0.00           H
ATOM    626  CZ  PHE A 238      47.741  37.818  75.865  1.00  0.00           C
ATOM    627  HZ  PHE A 238      47.340  36.953  76.372  1.00  0.00           H
ATOM    628  CD2 PHE A 238      48.143  38.903  73.786  1.00  0.00           C
ATOM    629  HD2 PHE A 238      47.860  39.002  72.749  1.00  0.00           H
ATOM    630  CE2 PHE A 238      47.577  37.898  74.497  1.00  0.00           C
ATOM    631  HE2 PHE A 238      46.972  37.115  74.064  1.00  0.00           H
ATOM    632  C   PHE A 238      47.260  42.364  74.883  1.00  0.00           C
ATOM    633  O   PHE A 238      47.544  43.020  75.910  1.00  0.00           O
ATOM    634  N   LEU A 239      46.068  41.729  74.746  1.00  0.00           N
ATOM    635  HN  LEU A 239      45.739  41.323  73.897  1.00  0.00           H
ATOM    636  CA  LEU A 239      45.067  41.794  75.780  1.00  0.00           C
ATOM    637  HA  LEU A 239      45.387  42.430  76.592  1.00  0.00           H
ATOM    638  CB  LEU A 239      43.752  42.292  75.183  1.00  0.00           C
ATOM    639  HB1 LEU A 239      43.422  41.611  74.370  1.00  0.00           H
ATOM    640  HB2 LEU A 239      43.012  42.220  76.008  1.00  0.00           H
ATOM    641  CG  LEU A 239      43.882  43.791  74.861  1.00  0.00           C
ATOM    642  HG  LEU A 239      44.785  44.042  74.264  1.00  0.00           H
ATOM    643  CD1 LEU A 239      42.731  44.391  74.029  1.00  0.00           C
ATOM    644 1HD1 LEU A 239      42.705  43.922  73.022  1.00  0.00           H
ATOM    645 2HD1 LEU A 239      41.755  44.285  74.549  1.00  0.00           H
ATOM    646 3HD1 LEU A 239      42.776  45.493  73.892  1.00  0.00           H
ATOM    647  CD2 LEU A 239      43.939  44.591  76.172  1.00  0.00           C
ATOM    648 1HD2 LEU A 239      43.800  45.675  75.975  1.00  0.00           H
ATOM    649 2HD2 LEU A 239      43.078  44.388  76.844  1.00  0.00           H
ATOM    650 3HD2 LEU A 239      44.854  44.412  76.777  1.00  0.00           H
ATOM    651  C   LEU A 239      44.709  40.443  76.490  1.00  0.00           C
ATOM    652  O   LEU A 239      44.625  40.380  77.738  1.00  0.00           O
ATOM    653  N   THR A 240      44.441  39.402  75.647  1.00  0.00           N
ATOM    654  HN  THR A 240      44.503  39.567  74.665  1.00  0.00           H
ATOM    655  CA  THR A 240      43.880  38.125  76.199  1.00  0.00           C
ATOM    656  HA  THR A 240      44.380  37.951  77.140  1.00  0.00           H
ATOM    657  CB  THR A 240      42.379  38.188  76.491  1.00  0.00           C
ATOM    658  HB  THR A 240      42.339  39.192  76.965  1.00  0.00           H
ATOM    659  OG1 THR A 240      41.986  37.145  77.338  1.00  0.00           O
ATOM    660  HG1 THR A 240      41.113  37.410  77.640  1.00  0.00           H
ATOM    661  CG2 THR A 240      41.509  38.235  75.218  1.00  0.00           C
ATOM    662 1HG2 THR A 240      40.517  38.710  75.371  1.00  0.00           H
ATOM    663 2HG2 THR A 240      42.043  38.641  74.332  1.00  0.00           H
ATOM    664 3HG2 THR A 240      41.230  37.216  74.877  1.00  0.00           H
ATOM    665  C   THR A 240      44.158  37.003  75.228  1.00  0.00           C
ATOM    666  O   THR A 240      44.475  37.202  74.062  1.00  0.00           O
ATOM    667  N   PHE A 241      43.963  35.755  75.679  1.00  0.00           N
ATOM    668  HN  PHE A 241      43.654  35.662  76.622  1.00  0.00           H
ATOM    669  CA  PHE A 241      43.863  34.603  74.807  1.00  0.00           C
ATOM    670  HA  PHE A 241      44.304  34.783  73.837  1.00  0.00           H
ATOM    671  CB  PHE A 241      44.611  33.388  75.511  1.00  0.00           C
ATOM    672  HB1 PHE A 241      44.202  33.272  76.537  1.00  0.00           H
ATOM    673  HB2 PHE A 241      44.570  32.461  74.899  1.00  0.00           H
ATOM    674  CG  PHE A 241      46.091  33.685  75.655  1.00  0.00           C
ATOM    675  CD1 PHE A 241      46.892  34.117  74.607  1.00  0.00           C
ATOM    676  HD1 PHE A 241      46.503  34.126  73.599  1.00  0.00           H
ATOM    677  CE1 PHE A 241      48.247  34.367  74.793  1.00  0.00           C
ATOM    678  HE1 PHE A 241      48.856  34.818  74.023  1.00  0.00           H
ATOM    679  CZ  PHE A 241      48.845  34.067  76.061  1.00  0.00           C
ATOM    680  HZ  PHE A 241      49.888  34.323  76.173  1.00  0.00           H
ATOM    681  CD2 PHE A 241      46.737  33.450  76.896  1.00  0.00           C
ATOM    682  HD2 PHE A 241      46.181  33.047  77.730  1.00  0.00           H
ATOM    683  CE2 PHE A 241      48.103  33.604  77.123  1.00  0.00           C
ATOM    684  HE2 PHE A 241      48.582  33.235  78.018  1.00  0.00           H
ATOM    685  C   PHE A 241      42.461  34.132  74.606  1.00  0.00           C
ATOM    686  O   PHE A 241      41.765  33.775  75.549  1.00  0.00           O
ATOM    687  N   LEU A 242      41.999  34.163  73.354  1.00  0.00           N
ATOM    688  HN  LEU A 242      42.609  34.443  72.616  1.00  0.00           H
ATOM    689  CA  LEU A 242      40.694  33.765  72.879  1.00  0.00           C
ATOM    690  HA  LEU A 242      39.851  34.282  73.311  1.00  0.00           H
ATOM    691  CB  LEU A 242      40.656  34.126  71.299  1.00  0.00           C
ATOM    692  HB1 LEU A 242      41.519  33.595  70.844  1.00  0.00           H
ATOM    693  HB2 LEU A 242      39.740  33.722  70.818  1.00  0.00           H
ATOM    694  CG  LEU A 242      40.835  35.595  70.893  1.00  0.00           C
ATOM    695  HG  LEU A 242      41.476  36.171  71.595  1.00  0.00           H
ATOM    696  CD1 LEU A 242      41.448  35.533  69.523  1.00  0.00           C
ATOM    697 1HD1 LEU A 242      42.395  35.001  69.292  1.00  0.00           H
ATOM    698 2HD1 LEU A 242      40.777  34.833  68.982  1.00  0.00           H
ATOM    699 3HD1 LEU A 242      41.419  36.501  68.979  1.00  0.00           H
ATOM    700  CD2 LEU A 242      39.458  36.312  70.769  1.00  0.00           C
ATOM    701 1HD2 LEU A 242      38.805  35.944  69.949  1.00  0.00           H
ATOM    702 2HD2 LEU A 242      38.949  36.402  71.752  1.00  0.00           H
ATOM    703 3HD2 LEU A 242      39.599  37.350  70.398  1.00  0.00           H
ATOM    704  C   LEU A 242      40.525  32.255  73.063  1.00  0.00           C
ATOM    705  O   LEU A 242      39.394  31.856  73.340  1.00  0.00           O
ATOM    706  N   ASP A 243      41.549  31.373  72.765  1.00  0.00           N
ATOM    707  HN  ASP A 243      42.453  31.686  72.485  1.00  0.00           H
ATOM    708  CA  ASP A 243      41.447  30.052  73.225  1.00  0.00           C
ATOM    709  HA  ASP A 243      40.983  30.085  74.200  1.00  0.00           H
ATOM    710  CB  ASP A 243      40.690  29.220  72.224  1.00  0.00           C
ATOM    711  HB1 ASP A 243      39.834  29.750  71.754  1.00  0.00           H
ATOM    712  HB2 ASP A 243      41.307  28.960  71.337  1.00  0.00           H
ATOM    713  CG  ASP A 243      40.130  27.882  72.733  1.00  0.00           C
ATOM    714  OD1 ASP A 243      40.143  27.822  73.979  1.00  0.00           O
ATOM    715  OD2 ASP A 243      39.675  27.007  71.962  1.00  0.00           O
ATOM    716  C   ASP A 243      42.923  29.634  73.316  1.00  0.00           C
ATOM    717  O   ASP A 243      43.720  30.003  72.464  1.00  0.00           O
ATOM    718  N   ARG A 244      43.327  28.876  74.402  1.00  0.00           N
ATOM    719  HN  ARG A 244      42.623  28.459  74.971  1.00  0.00           H
ATOM    720  CA  ARG A 244      44.670  28.388  74.704  1.00  0.00           C
ATOM    721  HA  ARG A 244      45.120  28.527  73.733  1.00  0.00           H
ATOM    722  CB  ARG A 244      45.434  29.255  75.641  1.00  0.00           C
ATOM    723  HB1 ARG A 244      46.443  28.857  75.879  1.00  0.00           H
ATOM    724  HB2 ARG A 244      45.724  30.125  75.014  1.00  0.00           H
ATOM    725  CG  ARG A 244      44.600  29.894  76.823  1.00  0.00           C
ATOM    726  HG1 ARG A 244      45.156  30.823  77.070  1.00  0.00           H
ATOM    727  HG2 ARG A 244      43.643  30.305  76.434  1.00  0.00           H
ATOM    728  CD  ARG A 244      44.412  28.990  77.993  1.00  0.00           C
ATOM    729  HD1 ARG A 244      43.999  29.503  78.888  1.00  0.00           H
ATOM    730  HD2 ARG A 244      43.820  28.093  77.713  1.00  0.00           H
ATOM    731  NE  ARG A 244      45.703  28.356  78.434  1.00  0.00           N
ATOM    732  HE  ARG A 244      46.323  29.013  78.863  1.00  0.00           H
ATOM    733  CZ  ARG A 244      46.019  27.092  78.708  1.00  0.00           C
ATOM    734  NH1 ARG A 244      45.127  26.111  78.758  1.00  0.00           N
ATOM    735 1HH1 ARG A 244      44.184  26.441  78.716  1.00  0.00           H
ATOM    736 2HH1 ARG A 244      45.302  25.127  78.782  1.00  0.00           H
ATOM    737  NH2 ARG A 244      47.272  26.777  78.987  1.00  0.00           N
ATOM    738 1HH2 ARG A 244      47.977  27.479  79.088  1.00  0.00           H
ATOM    739 2HH2 ARG A 244      47.401  25.793  79.111  1.00  0.00           H
ATOM    740  C   ARG A 244      44.632  26.865  75.044  1.00  0.00           C
ATOM    741  O   ARG A 244      43.779  26.360  75.789  1.00  0.00           O
ATOM    742  N   ASP A 245      45.570  26.100  74.456  1.00  0.00           N
ATOM    743  HN  ASP A 245      46.176  26.405  73.725  1.00  0.00           H
ATOM    744  CA  ASP A 245      45.957  24.812  75.050  1.00  0.00           C
ATOM    745  HA  ASP A 245      45.540  24.806  76.046  1.00  0.00           H
ATOM    746  CB  ASP A 245      45.277  23.579  74.359  1.00  0.00           C
ATOM    747  HB1 ASP A 245      44.177  23.729  74.308  1.00  0.00           H
ATOM    748  HB2 ASP A 245      45.536  23.335  73.307  1.00  0.00           H
ATOM    749  CG  ASP A 245      45.539  22.298  75.101  1.00  0.00           C
ATOM    750  OD1 ASP A 245      45.287  21.218  74.530  1.00  0.00           O
ATOM    751  OD2 ASP A 245      46.026  22.323  76.286  1.00  0.00           O
ATOM    752  C   ASP A 245      47.450  24.711  75.166  1.00  0.00           C
ATOM    753  O   ASP A 245      48.185  25.102  74.203  1.00  0.00           O
ATOM    754  N   ASP A 246      47.990  24.345  76.307  1.00  0.00           N
ATOM    755  HN  ASP A 246      47.336  23.965  76.956  1.00  0.00           H
ATOM    756  CA  ASP A 246      49.407  24.237  76.505  1.00  0.00           C
ATOM    757  HA  ASP A 246      50.007  24.738  75.760  1.00  0.00           H
ATOM    758  CB  ASP A 246      49.731  24.738  77.929  1.00  0.00           C
ATOM    759  HB1 ASP A 246      50.830  24.698  78.087  1.00  0.00           H
ATOM    760  HB2 ASP A 246      49.499  25.802  78.148  1.00  0.00           H
ATOM    761  CG  ASP A 246      49.132  23.845  78.976  1.00  0.00           C
ATOM    762  OD1 ASP A 246      49.351  22.591  78.892  1.00  0.00           O
ATOM    763  OD2 ASP A 246      48.523  24.338  79.933  1.00  0.00           O
ATOM    764  C   ASP A 246      49.917  22.822  76.273  1.00  0.00           C
ATOM    765  O   ASP A 246      51.091  22.625  76.550  1.00  0.00           O
ATOM    766  N   GLY A 247      49.108  21.837  75.822  1.00  0.00           N
ATOM    767  HN  GLY A 247      48.120  21.954  75.765  1.00  0.00           H
ATOM    768  CA  GLY A 247      49.622  20.536  75.405  1.00  0.00           C
ATOM    769  HA1 GLY A 247      50.130  20.047  76.223  1.00  0.00           H
ATOM    770  HA2 GLY A 247      48.698  19.998  75.249  1.00  0.00           H
ATOM    771  C   GLY A 247      50.537  20.442  74.161  1.00  0.00           C
ATOM    772  O   GLY A 247      50.636  21.343  73.308  1.00  0.00           O
ATOM    773  N   ALA A 248      51.107  19.313  73.923  1.00  0.00           N
ATOM    774  HN  ALA A 248      50.820  18.545  74.491  1.00  0.00           H
ATOM    775  CA  ALA A 248      52.060  19.028  72.837  1.00  0.00           C
ATOM    776  HA  ALA A 248      52.525  19.973  72.600  1.00  0.00           H
ATOM    777  CB  ALA A 248      53.078  17.962  73.178  1.00  0.00           C
ATOM    778  HB1 ALA A 248      53.812  17.741  72.374  1.00  0.00           H
ATOM    779  HB2 ALA A 248      53.712  18.402  73.978  1.00  0.00           H
ATOM    780  HB3 ALA A 248      52.618  17.008  73.514  1.00  0.00           H
ATOM    781  C   ALA A 248      51.336  18.545  71.557  1.00  0.00           C
ATOM    782  O   ALA A 248      50.176  18.175  71.578  1.00  0.00           O
ATOM    783  N   LYS A 249      52.106  18.504  70.458  1.00  0.00           N
ATOM    784  HN  LYS A 249      53.068  18.765  70.463  1.00  0.00           H
ATOM    785  CA  LYS A 249      51.777  17.848  69.143  1.00  0.00           C
ATOM    786  HA  LYS A 249      52.564  18.174  68.479  1.00  0.00           H
ATOM    787  CB  LYS A 249      51.727  16.309  69.272  1.00  0.00           C
ATOM    788  HB1 LYS A 249      50.972  16.059  70.047  1.00  0.00           H
ATOM    789  HB2 LYS A 249      51.458  15.831  68.306  1.00  0.00           H
ATOM    790  CG  LYS A 249      53.157  15.635  69.640  1.00  0.00           C
ATOM    791  HG1 LYS A 249      53.455  16.112  70.598  1.00  0.00           H
ATOM    792  HG2 LYS A 249      52.900  14.556  69.712  1.00  0.00           H
ATOM    793  CD  LYS A 249      54.211  15.757  68.539  1.00  0.00           C
ATOM    794  HD1 LYS A 249      53.666  15.264  67.706  1.00  0.00           H
ATOM    795  HD2 LYS A 249      54.376  16.832  68.312  1.00  0.00           H
ATOM    796  CE  LYS A 249      55.560  15.118  68.809  1.00  0.00           C
ATOM    797  HE1 LYS A 249      55.984  15.821  69.557  1.00  0.00           H
ATOM    798  HE2 LYS A 249      55.571  14.056  69.137  1.00  0.00           H
ATOM    799  NZ  LYS A 249      56.452  15.259  67.554  1.00  0.00           N
ATOM    800  HZ1 LYS A 249      57.438  14.935  67.631  1.00  0.00           H
ATOM    801  HZ2 LYS A 249      56.019  14.886  66.685  1.00  0.00           H
ATOM    802  HZ3 LYS A 249      56.461  16.273  67.323  1.00  0.00           H
ATOM    803  C   LYS A 249      50.516  18.473  68.515  1.00  0.00           C
ATOM    804  O   LYS A 249      49.718  17.920  67.779  1.00  0.00           O
ATOM    805  N   LYS A 250      50.394  19.764  68.752  1.00  0.00           N
ATOM    806  HN  LYS A 250      51.180  20.184  69.198  1.00  0.00           H
ATOM    807  CA  LYS A 250      49.344  20.534  68.113  1.00  0.00           C
ATOM    808  HA  LYS A 250      48.472  19.899  68.162  1.00  0.00           H
ATOM    809  CB  LYS A 250      49.241  21.924  68.811  1.00  0.00           C
ATOM    810  HB1 LYS A 250      50.196  22.475  68.677  1.00  0.00           H
ATOM    811  HB2 LYS A 250      48.457  22.568  68.359  1.00  0.00           H
ATOM    812  CG  LYS A 250      48.935  21.709  70.295  1.00  0.00           C
ATOM    813  HG1 LYS A 250      49.813  21.388  70.895  1.00  0.00           H
ATOM    814  HG2 LYS A 250      48.786  22.738  70.685  1.00  0.00           H
ATOM    815  CD  LYS A 250      47.639  20.818  70.493  1.00  0.00           C
ATOM    816  HD1 LYS A 250      46.897  21.175  69.747  1.00  0.00           H
ATOM    817  HD2 LYS A 250      47.838  19.733  70.365  1.00  0.00           H
ATOM    818  CE  LYS A 250      47.031  21.047  71.918  1.00  0.00           C
ATOM    819  HE1 LYS A 250      47.831  21.056  72.689  1.00  0.00           H
ATOM    820  HE2 LYS A 250      46.530  22.038  71.897  1.00  0.00           H
ATOM    821  NZ  LYS A 250      46.191  19.939  72.278  1.00  0.00           N
ATOM    822  HZ1 LYS A 250      45.346  19.930  71.673  1.00  0.00           H
ATOM    823  HZ2 LYS A 250      46.694  19.030  72.241  1.00  0.00           H
ATOM    824  HZ3 LYS A 250      45.921  20.044  73.276  1.00  0.00           H
ATOM    825  C   LYS A 250      49.552  20.779  66.610  1.00  0.00           C
ATOM    826  O   LYS A 250      50.678  21.097  66.207  1.00  0.00           O
ATOM    827  N   VAL A 251      48.539  20.571  65.726  1.00  0.00           N
ATOM    828  HN  VAL A 251      47.653  20.263  66.065  1.00  0.00           H
ATOM    829  CA  VAL A 251      48.755  20.578  64.301  1.00  0.00           C
ATOM    830  HA  VAL A 251      49.812  20.508  64.091  1.00  0.00           H
ATOM    831  CB  VAL A 251      48.156  19.322  63.644  1.00  0.00           C
ATOM    832  HB  VAL A 251      48.597  18.468  64.202  1.00  0.00           H
ATOM    833  CG1 VAL A 251      46.631  19.255  63.900  1.00  0.00           C
ATOM    834 1HG1 VAL A 251      46.092  18.363  63.515  1.00  0.00           H
ATOM    835 2HG1 VAL A 251      46.382  19.357  64.978  1.00  0.00           H
ATOM    836 3HG1 VAL A 251      46.120  20.138  63.461  1.00  0.00           H
ATOM    837  CG2 VAL A 251      48.538  19.162  62.108  1.00  0.00           C
ATOM    838 1HG2 VAL A 251      48.277  18.150  61.731  1.00  0.00           H
ATOM    839 2HG2 VAL A 251      48.115  19.873  61.366  1.00  0.00           H
ATOM    840 3HG2 VAL A 251      49.635  19.149  61.938  1.00  0.00           H
ATOM    841  C   VAL A 251      48.291  21.797  63.612  1.00  0.00           C
ATOM    842  O   VAL A 251      47.301  22.426  63.988  1.00  0.00           O
ATOM    843  N   PHE A 252      49.008  22.288  62.585  1.00  0.00           N
ATOM    844  HN  PHE A 252      49.950  22.009  62.414  1.00  0.00           H
ATOM    845  CA  PHE A 252      48.815  23.527  61.888  1.00  0.00           C
ATOM    846  HA  PHE A 252      47.828  23.928  62.069  1.00  0.00           H
ATOM    847  CB  PHE A 252      49.830  24.569  62.382  1.00  0.00           C
ATOM    848  HB1 PHE A 252      50.868  24.196  62.249  1.00  0.00           H
ATOM    849  HB2 PHE A 252      49.814  25.552  61.865  1.00  0.00           H
ATOM    850  CG  PHE A 252      49.513  24.901  63.839  1.00  0.00           C
ATOM    851  CD1 PHE A 252      50.422  24.476  64.827  1.00  0.00           C
ATOM    852  HD1 PHE A 252      51.265  23.924  64.440  1.00  0.00           H
ATOM    853  CE1 PHE A 252      50.110  24.645  66.236  1.00  0.00           C
ATOM    854  HE1 PHE A 252      50.784  24.233  66.972  1.00  0.00           H
ATOM    855  CZ  PHE A 252      48.939  25.296  66.587  1.00  0.00           C
ATOM    856  HZ  PHE A 252      48.662  25.302  67.631  1.00  0.00           H
ATOM    857  CD2 PHE A 252      48.322  25.579  64.278  1.00  0.00           C
ATOM    858  HD2 PHE A 252      47.633  25.927  63.523  1.00  0.00           H
ATOM    859  CE2 PHE A 252      47.986  25.733  65.619  1.00  0.00           C
ATOM    860  HE2 PHE A 252      46.990  26.134  65.737  1.00  0.00           H
ATOM    861  C   PHE A 252      48.961  23.350  60.386  1.00  0.00           C
ATOM    862  O   PHE A 252      49.510  22.384  59.816  1.00  0.00           O
ATOM    863  N   TYR A 253      48.546  24.340  59.604  1.00  0.00           N
ATOM    864  HN  TYR A 253      48.199  25.149  60.072  1.00  0.00           H
ATOM    865  CA  TYR A 253      48.876  24.453  58.206  1.00  0.00           C
ATOM    866  HA  TYR A 253      48.963  23.472  57.762  1.00  0.00           H
ATOM    867  CB  TYR A 253      47.627  25.289  57.616  1.00  0.00           C
ATOM    868  HB1 TYR A 253      46.646  24.909  57.975  1.00  0.00           H
ATOM    869  HB2 TYR A 253      47.602  26.388  57.776  1.00  0.00           H
ATOM    870  CG  TYR A 253      47.627  25.189  56.123  1.00  0.00           C
ATOM    871  CD1 TYR A 253      48.187  26.208  55.317  1.00  0.00           C
ATOM    872  HD1 TYR A 253      48.673  27.060  55.769  1.00  0.00           H
ATOM    873  CE1 TYR A 253      48.071  26.079  53.871  1.00  0.00           C
ATOM    874  HE1 TYR A 253      48.409  26.980  53.381  1.00  0.00           H
ATOM    875  CZ  TYR A 253      47.476  25.001  53.306  1.00  0.00           C
ATOM    876  OH  TYR A 253      47.172  24.921  51.940  1.00  0.00           O
ATOM    877  HH  TYR A 253      47.405  25.775  51.568  1.00  0.00           H
ATOM    878  CD2 TYR A 253      47.089  24.067  55.505  1.00  0.00           C
ATOM    879  HD2 TYR A 253      46.624  23.298  56.104  1.00  0.00           H
ATOM    880  CE2 TYR A 253      46.954  23.945  54.067  1.00  0.00           C
ATOM    881  HE2 TYR A 253      46.437  23.100  53.636  1.00  0.00           H
ATOM    882  C   TYR A 253      50.127  25.313  58.070  1.00  0.00           C
ATOM    883  O   TYR A 253      50.509  26.066  58.955  1.00  0.00           O
ATOM    884  N   VAL A 254      50.930  25.207  56.909  1.00  0.00           N
ATOM    885  HN  VAL A 254      50.740  24.640  56.111  1.00  0.00           H
ATOM    886  CA  VAL A 254      52.165  25.923  56.699  1.00  0.00           C
ATOM    887  HA  VAL A 254      52.517  26.400  57.602  1.00  0.00           H
ATOM    888  CB  VAL A 254      53.257  24.978  56.286  1.00  0.00           C
ATOM    889  HB  VAL A 254      53.002  24.635  55.260  1.00  0.00           H
ATOM    890  CG1 VAL A 254      54.561  25.694  56.477  1.00  0.00           C
ATOM    891 1HG1 VAL A 254      55.431  25.065  56.190  1.00  0.00           H
ATOM    892 2HG1 VAL A 254      54.557  26.602  55.836  1.00  0.00           H
ATOM    893 3HG1 VAL A 254      54.917  26.031  57.474  1.00  0.00           H
ATOM    894  CG2 VAL A 254      53.097  23.659  57.114  1.00  0.00           C
ATOM    895 1HG2 VAL A 254      52.225  23.056  56.783  1.00  0.00           H
ATOM    896 2HG2 VAL A 254      54.001  23.017  57.045  1.00  0.00           H
ATOM    897 3HG2 VAL A 254      53.054  23.913  58.195  1.00  0.00           H
ATOM    898  C   VAL A 254      52.147  27.098  55.646  1.00  0.00           C
ATOM    899  O   VAL A 254      51.656  26.842  54.574  1.00  0.00           O
ATOM    900  N   ILE A 255      52.614  28.356  56.063  1.00  0.00           N
ATOM    901  HN  ILE A 255      52.952  28.529  56.985  1.00  0.00           H
ATOM    902  CA  ILE A 255      52.733  29.441  55.123  1.00  0.00           C
ATOM    903  HA  ILE A 255      52.482  29.093  54.133  1.00  0.00           H
ATOM    904  CB  ILE A 255      51.904  30.703  55.411  1.00  0.00           C
ATOM    905  HB  ILE A 255      52.001  30.941  56.492  1.00  0.00           H
ATOM    906  CG2 ILE A 255      52.480  31.930  54.610  1.00  0.00           C
ATOM    907 1HG2 ILE A 255      53.425  32.262  55.092  1.00  0.00           H
ATOM    908 2HG2 ILE A 255      52.644  31.622  53.555  1.00  0.00           H
ATOM    909 3HG2 ILE A 255      51.730  32.749  54.603  1.00  0.00           H
ATOM    910  CG1 ILE A 255      50.317  30.323  55.206  1.00  0.00           C
ATOM    911 1HG1 ILE A 255      50.037  29.482  55.876  1.00  0.00           H
ATOM    912 2HG1 ILE A 255      49.588  31.106  55.504  1.00  0.00           H
ATOM    913  CD  ILE A 255      49.891  29.880  53.804  1.00  0.00           C
ATOM    914  HD1 ILE A 255      50.367  30.413  52.952  1.00  0.00           H
ATOM    915  HD2 ILE A 255      50.081  28.793  53.673  1.00  0.00           H
ATOM    916  HD3 ILE A 255      48.805  30.111  53.839  1.00  0.00           H
ATOM    917  C   ILE A 255      54.211  29.793  55.090  1.00  0.00           C
ATOM    918  O   ILE A 255      54.755  30.119  56.129  1.00  0.00           O
ATOM    919  N   GLU A 256      54.774  29.842  53.871  1.00  0.00           N
ATOM    920  HN  GLU A 256      54.302  29.799  52.994  1.00  0.00           H
ATOM    921  CA  GLU A 256      56.167  30.073  53.817  1.00  0.00           C
ATOM    922  HA  GLU A 256      56.496  30.631  54.681  1.00  0.00           H
ATOM    923  CB  GLU A 256      56.881  28.787  53.579  1.00  0.00           C
ATOM    924  HB1 GLU A 256      56.520  28.054  54.332  1.00  0.00           H
ATOM    925  HB2 GLU A 256      56.525  28.376  52.610  1.00  0.00           H
ATOM    926  CG  GLU A 256      58.420  28.822  53.727  1.00  0.00           C
ATOM    927  HG1 GLU A 256      58.856  29.574  53.036  1.00  0.00           H
ATOM    928  HG2 GLU A 256      58.393  29.365  54.696  1.00  0.00           H
ATOM    929  CD  GLU A 256      59.171  27.573  53.856  1.00  0.00           C
ATOM    930  OE1 GLU A 256      59.856  27.373  54.889  1.00  0.00           O
ATOM    931  OE2 GLU A 256      59.111  26.729  52.898  1.00  0.00           O
ATOM    932  C   GLU A 256      56.417  31.009  52.594  1.00  0.00           C
ATOM    933  O   GLU A 256      55.819  30.801  51.510  1.00  0.00           O
ATOM    934  N   THR A 257      57.251  32.057  52.816  1.00  0.00           N
ATOM    935  HN  THR A 257      57.561  32.137  53.760  1.00  0.00           H
ATOM    936  CA  THR A 257      57.694  32.918  51.782  1.00  0.00           C
ATOM    937  HA  THR A 257      56.802  33.041  51.186  1.00  0.00           H
ATOM    938  CB  THR A 257      58.134  34.284  52.157  1.00  0.00           C
ATOM    939  HB  THR A 257      58.698  34.817  51.361  1.00  0.00           H
ATOM    940  OG1 THR A 257      58.922  34.333  53.374  1.00  0.00           O
ATOM    941  HG1 THR A 257      59.211  35.229  53.562  1.00  0.00           H
ATOM    942  CG2 THR A 257      56.820  35.111  52.379  1.00  0.00           C
ATOM    943 1HG2 THR A 257      56.223  34.757  53.247  1.00  0.00           H
ATOM    944 2HG2 THR A 257      57.066  36.130  52.745  1.00  0.00           H
ATOM    945 3HG2 THR A 257      56.234  35.170  51.437  1.00  0.00           H
ATOM    946  C   THR A 257      58.729  32.259  50.897  1.00  0.00           C
ATOM    947  O   THR A 257      59.378  31.332  51.405  1.00  0.00           O
ATOM    948  N   ARG A 258      58.756  32.691  49.612  1.00  0.00           N
ATOM    949  HN  ARG A 258      58.096  33.370  49.301  1.00  0.00           H
ATOM    950  CA  ARG A 258      59.866  32.361  48.699  1.00  0.00           C
ATOM    951  HA  ARG A 258      59.974  31.290  48.615  1.00  0.00           H
ATOM    952  CB  ARG A 258      59.643  32.930  47.284  1.00  0.00           C
ATOM    953  HB1 ARG A 258      59.657  34.037  47.369  1.00  0.00           H
ATOM    954  HB2 ARG A 258      60.438  32.675  46.552  1.00  0.00           H
ATOM    955  CG  ARG A 258      58.356  32.433  46.606  1.00  0.00           C
ATOM    956  HG1 ARG A 258      58.291  31.324  46.621  1.00  0.00           H
ATOM    957  HG2 ARG A 258      57.508  32.917  47.135  1.00  0.00           H
ATOM    958  CD  ARG A 258      58.278  32.979  45.165  1.00  0.00           C
ATOM    959  HD1 ARG A 258      58.180  34.085  45.157  1.00  0.00           H
ATOM    960  HD2 ARG A 258      59.193  32.701  44.598  1.00  0.00           H
ATOM    961  NE  ARG A 258      57.017  32.492  44.530  1.00  0.00           N
ATOM    962  HE  ARG A 258      56.439  31.747  44.863  1.00  0.00           H
ATOM    963  CZ  ARG A 258      56.555  32.939  43.401  1.00  0.00           C
ATOM    964  NH1 ARG A 258      56.992  33.961  42.688  1.00  0.00           N
ATOM    965 1HH1 ARG A 258      57.927  34.289  42.822  1.00  0.00           H
ATOM    966 2HH1 ARG A 258      56.745  33.961  41.719  1.00  0.00           H
ATOM    967  NH2 ARG A 258      55.526  32.280  42.892  1.00  0.00           N
ATOM    968 1HH2 ARG A 258      55.433  31.324  43.169  1.00  0.00           H
ATOM    969 2HH2 ARG A 258      55.019  32.666  42.121  1.00  0.00           H
ATOM    970  C   ARG A 258      61.222  32.902  49.242  1.00  0.00           C
ATOM    971  O   ARG A 258      61.280  33.913  49.923  1.00  0.00           O
ATOM    972  N   GLU A 259      62.351  32.290  48.816  1.00  0.00           N
ATOM    973  HN  GLU A 259      62.326  31.549  48.150  1.00  0.00           H
ATOM    974  CA  GLU A 259      63.697  32.671  49.336  1.00  0.00           C
ATOM    975  HA  GLU A 259      63.690  32.412  50.384  1.00  0.00           H
ATOM    976  CB  GLU A 259      64.888  31.788  48.758  1.00  0.00           C
ATOM    977  HB1 GLU A 259      64.833  31.978  47.664  1.00  0.00           H
ATOM    978  HB2 GLU A 259      65.887  32.076  49.149  1.00  0.00           H
ATOM    979  CG  GLU A 259      64.712  30.278  48.981  1.00  0.00           C
ATOM    980  HG1 GLU A 259      64.303  30.104  49.999  1.00  0.00           H
ATOM    981  HG2 GLU A 259      63.955  29.783  48.336  1.00  0.00           H
ATOM    982  CD  GLU A 259      66.023  29.558  48.731  1.00  0.00           C
ATOM    983  OE1 GLU A 259      66.649  29.161  49.735  1.00  0.00           O
ATOM    984  OE2 GLU A 259      66.437  29.450  47.535  1.00  0.00           O
ATOM    985  C   GLU A 259      64.040  34.126  49.162  1.00  0.00           C
ATOM    986  O   GLU A 259      63.631  34.703  48.177  1.00  0.00           O
ATOM    987  N   PRO A 260      64.762  34.854  50.085  1.00  0.00           N
ATOM    988  CD  PRO A 260      65.148  36.241  49.691  1.00  0.00           C
ATOM    989  HD1 PRO A 260      64.239  36.860  49.845  1.00  0.00           H
ATOM    990  HD2 PRO A 260      65.668  36.394  48.721  1.00  0.00           H
ATOM    991  CA  PRO A 260      64.842  34.703  51.568  1.00  0.00           C
ATOM    992  HA  PRO A 260      65.511  33.905  51.854  1.00  0.00           H
ATOM    993  CB  PRO A 260      65.433  36.081  52.018  1.00  0.00           C
ATOM    994  HB1 PRO A 260      64.610  36.773  52.297  1.00  0.00           H
ATOM    995  HB2 PRO A 260      66.233  35.876  52.761  1.00  0.00           H
ATOM    996  CG  PRO A 260      66.150  36.658  50.804  1.00  0.00           C
ATOM    997  HG1 PRO A 260      66.199  37.768  50.835  1.00  0.00           H
ATOM    998  HG2 PRO A 260      67.142  36.209  50.585  1.00  0.00           H
ATOM    999  C   PRO A 260      63.507  34.295  52.208  1.00  0.00           C
ATOM   1000  O   PRO A 260      62.543  35.060  52.117  1.00  0.00           O
ATOM   1001  N   ARG A 261      63.461  33.189  52.927  1.00  0.00           N
ATOM   1002  HN  ARG A 261      64.212  32.734  53.399  1.00  0.00           H
ATOM   1003  CA  ARG A 261      62.222  32.623  53.377  1.00  0.00           C
ATOM   1004  HA  ARG A 261      61.431  33.144  52.859  1.00  0.00           H
ATOM   1005  CB  ARG A 261      62.201  31.109  52.896  1.00  0.00           C
ATOM   1006  HB1 ARG A 261      61.220  30.651  53.145  1.00  0.00           H
ATOM   1007  HB2 ARG A 261      62.169  31.049  51.787  1.00  0.00           H
ATOM   1008  CG  ARG A 261      63.335  30.152  53.305  1.00  0.00           C
ATOM   1009  HG1 ARG A 261      64.267  30.591  52.888  1.00  0.00           H
ATOM   1010  HG2 ARG A 261      63.489  30.296  54.396  1.00  0.00           H
ATOM   1011  CD  ARG A 261      63.232  28.689  53.001  1.00  0.00           C
ATOM   1012  HD1 ARG A 261      62.431  28.268  53.645  1.00  0.00           H
ATOM   1013  HD2 ARG A 261      62.962  28.505  51.939  1.00  0.00           H
ATOM   1014  NE  ARG A 261      64.515  27.990  53.227  1.00  0.00           N
ATOM   1015  HE  ARG A 261      65.166  27.818  52.488  1.00  0.00           H
ATOM   1016  CZ  ARG A 261      65.086  27.789  54.396  1.00  0.00           C
ATOM   1017  NH1 ARG A 261      64.513  28.114  55.552  1.00  0.00           N
ATOM   1018 1HH1 ARG A 261      63.545  28.360  55.612  1.00  0.00           H
ATOM   1019 2HH1 ARG A 261      65.031  27.966  56.394  1.00  0.00           H
ATOM   1020  NH2 ARG A 261      66.295  27.394  54.447  1.00  0.00           N
ATOM   1021 1HH2 ARG A 261      66.745  27.061  53.619  1.00  0.00           H
ATOM   1022 2HH2 ARG A 261      66.567  27.268  55.401  1.00  0.00           H
ATOM   1023  C   ARG A 261      62.008  32.724  54.866  1.00  0.00           C
ATOM   1024  O   ARG A 261      62.900  32.546  55.680  1.00  0.00           O
ATOM   1025  N   GLU A 262      60.719  33.011  55.232  1.00  0.00           N
ATOM   1026  HN  GLU A 262      59.967  33.108  54.584  1.00  0.00           H
ATOM   1027  CA  GLU A 262      60.327  32.995  56.599  1.00  0.00           C
ATOM   1028  HA  GLU A 262      61.009  32.406  57.194  1.00  0.00           H
ATOM   1029  CB  GLU A 262      60.058  34.458  57.071  1.00  0.00           C
ATOM   1030  HB1 GLU A 262      59.191  34.761  56.446  1.00  0.00           H
ATOM   1031  HB2 GLU A 262      59.755  34.408  58.139  1.00  0.00           H
ATOM   1032  CG  GLU A 262      61.253  35.486  57.004  1.00  0.00           C
ATOM   1033  HG1 GLU A 262      61.666  35.547  55.974  1.00  0.00           H
ATOM   1034  HG2 GLU A 262      60.842  36.489  57.248  1.00  0.00           H
ATOM   1035  CD  GLU A 262      62.441  35.163  57.839  1.00  0.00           C
ATOM   1036  OE1 GLU A 262      63.416  35.982  57.756  1.00  0.00           O
ATOM   1037  OE2 GLU A 262      62.482  34.110  58.567  1.00  0.00           O
ATOM   1038  C   GLU A 262      58.990  32.258  56.718  1.00  0.00           C
ATOM   1039  O   GLU A 262      58.198  32.185  55.732  1.00  0.00           O
ATOM   1040  N   ARG A 263      58.853  31.545  57.841  1.00  0.00           N
ATOM   1041  HN  ARG A 263      59.469  31.675  58.615  1.00  0.00           H
ATOM   1042  CA  ARG A 263      57.789  30.547  57.992  1.00  0.00           C
ATOM   1043  HA  ARG A 263      57.182  30.453  57.104  1.00  0.00           H
ATOM   1044  CB  ARG A 263      58.590  29.266  58.128  1.00  0.00           C
ATOM   1045  HB1 ARG A 263      59.218  29.042  57.239  1.00  0.00           H
ATOM   1046  HB2 ARG A 263      59.332  29.298  58.954  1.00  0.00           H
ATOM   1047  CG  ARG A 263      57.608  28.059  58.202  1.00  0.00           C
ATOM   1048  HG1 ARG A 263      56.974  28.210  59.101  1.00  0.00           H
ATOM   1049  HG2 ARG A 263      56.914  28.111  57.336  1.00  0.00           H
ATOM   1050  CD  ARG A 263      58.214  26.660  58.317  1.00  0.00           C
ATOM   1051  HD1 ARG A 263      59.060  26.647  59.038  1.00  0.00           H
ATOM   1052  HD2 ARG A 263      57.318  26.145  58.724  1.00  0.00           H
ATOM   1053  NE  ARG A 263      58.620  26.176  56.914  1.00  0.00           N
ATOM   1054  HE  ARG A 263      58.930  26.840  56.234  1.00  0.00           H
ATOM   1055  CZ  ARG A 263      58.576  24.982  56.476  1.00  0.00           C
ATOM   1056  NH1 ARG A 263      58.364  23.938  57.248  1.00  0.00           N
ATOM   1057 1HH1 ARG A 263      58.179  24.136  58.211  1.00  0.00           H
ATOM   1058 2HH1 ARG A 263      58.647  23.017  56.979  1.00  0.00           H
ATOM   1059  NH2 ARG A 263      58.920  24.719  55.242  1.00  0.00           N
ATOM   1060 1HH2 ARG A 263      59.088  25.530  54.682  1.00  0.00           H
ATOM   1061 2HH2 ARG A 263      58.966  23.781  54.896  1.00  0.00           H
ATOM   1062  C   ARG A 263      56.779  30.786  59.066  1.00  0.00           C
ATOM   1063  O   ARG A 263      57.167  30.964  60.211  1.00  0.00           O
ATOM   1064  N   LEU A 264      55.470  30.744  58.669  1.00  0.00           N
ATOM   1065  HN  LEU A 264      55.229  30.598  57.713  1.00  0.00           H
ATOM   1066  CA  LEU A 264      54.375  31.156  59.470  1.00  0.00           C
ATOM   1067  HA  LEU A 264      54.646  31.404  60.485  1.00  0.00           H
ATOM   1068  CB  LEU A 264      53.747  32.358  58.754  1.00  0.00           C
ATOM   1069  HB1 LEU A 264      54.529  33.147  58.742  1.00  0.00           H
ATOM   1070  HB2 LEU A 264      53.626  32.225  57.658  1.00  0.00           H
ATOM   1071  CG  LEU A 264      52.367  32.721  59.299  1.00  0.00           C
ATOM   1072  HG  LEU A 264      51.745  31.813  59.444  1.00  0.00           H
ATOM   1073  CD1 LEU A 264      52.470  33.325  60.735  1.00  0.00           C
ATOM   1074 1HD1 LEU A 264      52.989  34.306  60.775  1.00  0.00           H
ATOM   1075 2HD1 LEU A 264      51.426  33.396  61.109  1.00  0.00           H
ATOM   1076 3HD1 LEU A 264      53.115  32.659  61.346  1.00  0.00           H
ATOM   1077  CD2 LEU A 264      51.685  33.797  58.354  1.00  0.00           C
ATOM   1078 1HD2 LEU A 264      52.073  34.822  58.537  1.00  0.00           H
ATOM   1079 2HD2 LEU A 264      51.836  33.567  57.277  1.00  0.00           H
ATOM   1080 3HD2 LEU A 264      50.591  33.823  58.543  1.00  0.00           H
ATOM   1081  C   LEU A 264      53.471  29.883  59.558  1.00  0.00           C
ATOM   1082  O   LEU A 264      53.149  29.215  58.587  1.00  0.00           O
ATOM   1083  N   LEU A 265      53.076  29.527  60.793  1.00  0.00           N
ATOM   1084  HN  LEU A 265      53.271  30.099  61.586  1.00  0.00           H
ATOM   1085  CA  LEU A 265      52.377  28.259  61.121  1.00  0.00           C
ATOM   1086  HA  LEU A 265      51.928  27.777  60.265  1.00  0.00           H
ATOM   1087  CB  LEU A 265      53.034  27.182  62.049  1.00  0.00           C
ATOM   1088  HB1 LEU A 265      53.366  27.665  62.992  1.00  0.00           H
ATOM   1089  HB2 LEU A 265      52.242  26.420  62.212  1.00  0.00           H
ATOM   1090  CG  LEU A 265      54.338  26.440  61.646  1.00  0.00           C
ATOM   1091  HG  LEU A 265      55.244  27.083  61.621  1.00  0.00           H
ATOM   1092  CD1 LEU A 265      54.822  25.308  62.683  1.00  0.00           C
ATOM   1093 1HD1 LEU A 265      55.786  24.860  62.358  1.00  0.00           H
ATOM   1094 2HD1 LEU A 265      55.044  25.830  63.638  1.00  0.00           H
ATOM   1095 3HD1 LEU A 265      54.039  24.536  62.842  1.00  0.00           H
ATOM   1096  CD2 LEU A 265      54.258  25.837  60.219  1.00  0.00           C
ATOM   1097 1HD2 LEU A 265      55.292  25.493  60.006  1.00  0.00           H
ATOM   1098 2HD2 LEU A 265      53.435  25.122  60.004  1.00  0.00           H
ATOM   1099 3HD2 LEU A 265      54.126  26.707  59.541  1.00  0.00           H
ATOM   1100  C   LEU A 265      51.097  28.706  61.874  1.00  0.00           C
ATOM   1101  O   LEU A 265      51.172  29.353  62.944  1.00  0.00           O
ATOM   1102  N   LEU A 266      49.965  28.311  61.230  1.00  0.00           N
ATOM   1103  HN  LEU A 266      50.048  27.602  60.535  1.00  0.00           H
ATOM   1104  CA  LEU A 266      48.659  28.768  61.658  1.00  0.00           C
ATOM   1105  HA  LEU A 266      48.682  28.817  62.736  1.00  0.00           H
ATOM   1106  CB  LEU A 266      48.412  30.198  61.268  1.00  0.00           C
ATOM   1107  HB1 LEU A 266      47.519  30.524  61.844  1.00  0.00           H
ATOM   1108  HB2 LEU A 266      49.292  30.781  61.613  1.00  0.00           H
ATOM   1109  CG  LEU A 266      48.167  30.530  59.741  1.00  0.00           C
ATOM   1110  HG  LEU A 266      47.178  30.096  59.482  1.00  0.00           H
ATOM   1111  CD1 LEU A 266      48.108  32.035  59.401  1.00  0.00           C
ATOM   1112 1HD1 LEU A 266      47.513  32.615  60.140  1.00  0.00           H
ATOM   1113 2HD1 LEU A 266      49.148  32.426  59.402  1.00  0.00           H
ATOM   1114 3HD1 LEU A 266      47.631  32.192  58.411  1.00  0.00           H
ATOM   1115  CD2 LEU A 266      49.189  29.895  58.861  1.00  0.00           C
ATOM   1116 1HD2 LEU A 266      49.120  28.797  58.708  1.00  0.00           H
ATOM   1117 2HD2 LEU A 266      49.154  30.414  57.879  1.00  0.00           H
ATOM   1118 3HD2 LEU A 266      50.204  30.146  59.239  1.00  0.00           H
ATOM   1119  C   LEU A 266      47.567  27.806  61.363  1.00  0.00           C
ATOM   1120  O   LEU A 266      47.739  26.748  60.904  1.00  0.00           O
ATOM   1121  N   THR A 267      46.292  28.093  61.556  1.00  0.00           N
ATOM   1122  HN  THR A 267      46.192  29.006  61.944  1.00  0.00           H
ATOM   1123  CA  THR A 267      45.115  27.288  61.175  1.00  0.00           C
ATOM   1124  HA  THR A 267      45.481  26.275  61.097  1.00  0.00           H
ATOM   1125  CB  THR A 267      44.010  27.191  62.290  1.00  0.00           C
ATOM   1126  HB  THR A 267      43.119  26.658  61.895  1.00  0.00           H
ATOM   1127  OG1 THR A 267      43.728  28.440  62.894  1.00  0.00           O
ATOM   1128  HG1 THR A 267      43.032  28.894  62.413  1.00  0.00           H
ATOM   1129  CG2 THR A 267      44.560  26.318  63.418  1.00  0.00           C
ATOM   1130 1HG2 THR A 267      45.373  26.911  63.888  1.00  0.00           H
ATOM   1131 2HG2 THR A 267      43.766  26.144  64.175  1.00  0.00           H
ATOM   1132 3HG2 THR A 267      44.869  25.315  63.054  1.00  0.00           H
ATOM   1133  C   THR A 267      44.621  27.757  59.844  1.00  0.00           C
ATOM   1134  O   THR A 267      44.507  28.939  59.504  1.00  0.00           O
ATOM   1135  N   ALA A 268      44.186  26.794  59.037  1.00  0.00           N
ATOM   1136  HN  ALA A 268      44.341  25.831  59.241  1.00  0.00           H
ATOM   1137  CA  ALA A 268      43.552  26.954  57.723  1.00  0.00           C
ATOM   1138  HA  ALA A 268      44.354  27.265  57.070  1.00  0.00           H
ATOM   1139  CB  ALA A 268      43.168  25.648  57.044  1.00  0.00           C
ATOM   1140  HB1 ALA A 268      42.752  25.009  57.851  1.00  0.00           H
ATOM   1141  HB2 ALA A 268      42.373  25.741  56.274  1.00  0.00           H
ATOM   1142  HB3 ALA A 268      44.072  25.157  56.625  1.00  0.00           H
ATOM   1143  C   ALA A 268      42.387  27.940  57.602  1.00  0.00           C
ATOM   1144  O   ALA A 268      42.212  28.499  56.537  1.00  0.00           O
ATOM   1145  N   ALA A 269      41.606  28.135  58.627  1.00  0.00           N
ATOM   1146  HN  ALA A 269      41.776  27.674  59.495  1.00  0.00           H
ATOM   1147  CA  ALA A 269      40.442  29.009  58.596  1.00  0.00           C
ATOM   1148  HA  ALA A 269      40.105  29.082  57.573  1.00  0.00           H
ATOM   1149  CB  ALA A 269      39.281  28.270  59.274  1.00  0.00           C
ATOM   1150  HB1 ALA A 269      38.384  28.795  58.882  1.00  0.00           H
ATOM   1151  HB2 ALA A 269      39.292  27.235  58.870  1.00  0.00           H
ATOM   1152  HB3 ALA A 269      39.243  28.251  60.384  1.00  0.00           H
ATOM   1153  C   ALA A 269      40.754  30.318  59.339  1.00  0.00           C
ATOM   1154  O   ALA A 269      39.905  31.228  59.433  1.00  0.00           O
ATOM   1155  N   HSE A 270      42.021  30.487  59.714  1.00  0.00           N
ATOM   1156  HN  HSE A 270      42.685  29.765  59.539  1.00  0.00           H
ATOM   1157  CA  HSE A 270      42.563  31.667  60.259  1.00  0.00           C
ATOM   1158  HA  HSE A 270      41.745  31.982  60.889  1.00  0.00           H
ATOM   1159  CB  HSE A 270      43.963  31.487  61.021  1.00  0.00           C
ATOM   1160  HB1 HSE A 270      43.820  30.580  61.646  1.00  0.00           H
ATOM   1161  HB2 HSE A 270      44.796  31.380  60.294  1.00  0.00           H
ATOM   1162  ND1 HSE A 270      44.224  32.125  63.320  1.00  0.00           N
ATOM   1163  CG  HSE A 270      44.367  32.474  61.951  1.00  0.00           C
ATOM   1164  CE1 HSE A 270      44.799  33.150  63.955  1.00  0.00           C
ATOM   1165  HE1 HSE A 270      44.997  33.208  65.025  1.00  0.00           H
ATOM   1166  NE2 HSE A 270      45.192  34.137  63.081  1.00  0.00           N
ATOM   1167  HE2 HSE A 270      45.529  35.026  63.391  1.00  0.00           H
ATOM   1168  CD2 HSE A 270      44.828  33.727  61.799  1.00  0.00           C
ATOM   1169  HD2 HSE A 270      45.088  34.244  60.883  1.00  0.00           H
ATOM   1170  C   HSE A 270      42.729  32.698  59.156  1.00  0.00           C
ATOM   1171  O   HSE A 270      43.056  32.371  58.020  1.00  0.00           O
ATOM   1172  N   LEU A 271      42.337  33.928  59.390  1.00  0.00           N
ATOM   1173  HN  LEU A 271      42.131  34.236  60.316  1.00  0.00           H
ATOM   1174  CA  LEU A 271      42.393  34.944  58.467  1.00  0.00           C
ATOM   1175  HA  LEU A 271      42.077  34.627  57.484  1.00  0.00           H
ATOM   1176  CB  LEU A 271      41.563  36.217  58.817  1.00  0.00           C
ATOM   1177  HB1 LEU A 271      41.851  36.431  59.869  1.00  0.00           H
ATOM   1178  HB2 LEU A 271      41.815  37.103  58.197  1.00  0.00           H
ATOM   1179  CG  LEU A 271      40.083  35.939  58.631  1.00  0.00           C
ATOM   1180  HG  LEU A 271      39.926  34.896  58.981  1.00  0.00           H
ATOM   1181  CD1 LEU A 271      39.242  36.900  59.496  1.00  0.00           C
ATOM   1182 1HD1 LEU A 271      39.632  37.910  59.248  1.00  0.00           H
ATOM   1183 2HD1 LEU A 271      38.174  36.783  59.215  1.00  0.00           H
ATOM   1184 3HD1 LEU A 271      39.425  36.732  60.579  1.00  0.00           H
ATOM   1185  CD2 LEU A 271      39.688  36.102  57.186  1.00  0.00           C
ATOM   1186 1HD2 LEU A 271      40.350  35.602  56.447  1.00  0.00           H
ATOM   1187 2HD2 LEU A 271      38.646  35.718  57.144  1.00  0.00           H
ATOM   1188 3HD2 LEU A 271      39.658  37.201  57.025  1.00  0.00           H
ATOM   1189  C   LEU A 271      43.865  35.439  58.270  1.00  0.00           C
ATOM   1190  O   LEU A 271      44.662  35.685  59.206  1.00  0.00           O
ATOM   1191  N   LEU A 272      44.241  35.569  56.999  1.00  0.00           N
ATOM   1192  HN  LEU A 272      43.644  35.238  56.272  1.00  0.00           H
ATOM   1193  CA  LEU A 272      45.476  36.076  56.598  1.00  0.00           C
ATOM   1194  HA  LEU A 272      45.999  36.456  57.464  1.00  0.00           H
ATOM   1195  CB  LEU A 272      46.407  34.895  56.038  1.00  0.00           C
ATOM   1196  HB1 LEU A 272      46.589  34.185  56.873  1.00  0.00           H
ATOM   1197  HB2 LEU A 272      45.867  34.382  55.214  1.00  0.00           H
ATOM   1198  CG  LEU A 272      47.804  35.335  55.557  1.00  0.00           C
ATOM   1199  HG  LEU A 272      47.654  36.046  54.717  1.00  0.00           H
ATOM   1200  CD1 LEU A 272      48.639  36.154  56.544  1.00  0.00           C
ATOM   1201 1HD1 LEU A 272      48.076  37.018  56.958  1.00  0.00           H
ATOM   1202 2HD1 LEU A 272      49.077  35.621  57.415  1.00  0.00           H
ATOM   1203 3HD1 LEU A 272      49.466  36.614  55.963  1.00  0.00           H
ATOM   1204  CD2 LEU A 272      48.609  34.085  55.123  1.00  0.00           C
ATOM   1205 1HD2 LEU A 272      48.801  33.631  56.118  1.00  0.00           H
ATOM   1206 2HD2 LEU A 272      47.914  33.423  54.562  1.00  0.00           H
ATOM   1207 3HD2 LEU A 272      49.602  34.229  54.645  1.00  0.00           H
ATOM   1208  C   LEU A 272      45.359  37.249  55.618  1.00  0.00           C
ATOM   1209  O   LEU A 272      44.627  37.214  54.592  1.00  0.00           O
ATOM   1210  N   PHE A 273      46.156  38.308  55.785  1.00  0.00           N
ATOM   1211  HN  PHE A 273      46.812  38.151  56.519  1.00  0.00           H
ATOM   1212  CA  PHE A 273      46.438  39.426  54.873  1.00  0.00           C
ATOM   1213  HA  PHE A 273      45.494  39.796  54.501  1.00  0.00           H
ATOM   1214  CB  PHE A 273      47.128  40.672  55.593  1.00  0.00           C
ATOM   1215  HB1 PHE A 273      48.141  40.324  55.889  1.00  0.00           H
ATOM   1216  HB2 PHE A 273      47.238  41.552  54.923  1.00  0.00           H
ATOM   1217  CG  PHE A 273      46.332  41.150  56.837  1.00  0.00           C
ATOM   1218  CD1 PHE A 273      45.058  41.563  56.599  1.00  0.00           C
ATOM   1219  HD1 PHE A 273      44.715  41.709  55.585  1.00  0.00           H
ATOM   1220  CE1 PHE A 273      44.309  41.966  57.672  1.00  0.00           C
ATOM   1221  HE1 PHE A 273      43.363  42.444  57.465  1.00  0.00           H
ATOM   1222  CZ  PHE A 273      44.823  41.869  59.000  1.00  0.00           C
ATOM   1223  HZ  PHE A 273      44.149  42.166  59.790  1.00  0.00           H
ATOM   1224  CD2 PHE A 273      46.952  41.137  58.126  1.00  0.00           C
ATOM   1225  HD2 PHE A 273      48.006  40.916  58.210  1.00  0.00           H
ATOM   1226  CE2 PHE A 273      46.073  41.469  59.255  1.00  0.00           C
ATOM   1227  HE2 PHE A 273      46.377  41.374  60.287  1.00  0.00           H
ATOM   1228  C   PHE A 273      47.227  39.084  53.658  1.00  0.00           C
ATOM   1229  O   PHE A 273      48.158  38.316  53.741  1.00  0.00           O
ATOM   1230  N   VAL A 274      46.886  39.677  52.460  1.00  0.00           N
ATOM   1231  HN  VAL A 274      46.132  40.327  52.408  1.00  0.00           H
ATOM   1232  CA  VAL A 274      47.714  39.605  51.257  1.00  0.00           C
ATOM   1233  HA  VAL A 274      48.638  39.110  51.520  1.00  0.00           H
ATOM   1234  CB  VAL A 274      47.130  38.800  50.093  1.00  0.00           C
ATOM   1235  HB  VAL A 274      47.798  38.876  49.209  1.00  0.00           H
ATOM   1236  CG1 VAL A 274      46.896  37.275  50.469  1.00  0.00           C
ATOM   1237 1HG1 VAL A 274      46.370  36.560  49.801  1.00  0.00           H
ATOM   1238 2HG1 VAL A 274      47.891  36.792  50.574  1.00  0.00           H
ATOM   1239 3HG1 VAL A 274      46.437  37.281  51.481  1.00  0.00           H
ATOM   1240  CG2 VAL A 274      45.820  39.377  49.704  1.00  0.00           C
ATOM   1241 1HG2 VAL A 274      45.418  38.590  49.032  1.00  0.00           H
ATOM   1242 2HG2 VAL A 274      45.116  39.664  50.514  1.00  0.00           H
ATOM   1243 3HG2 VAL A 274      45.844  40.225  48.987  1.00  0.00           H
ATOM   1244  C   VAL A 274      48.051  41.034  50.687  1.00  0.00           C
ATOM   1245  O   VAL A 274      47.387  42.059  50.872  1.00  0.00           O
ATOM   1246  N   ALA A 275      49.239  41.166  50.035  1.00  0.00           N
ATOM   1247  HN  ALA A 275      49.785  40.359  49.824  1.00  0.00           H
ATOM   1248  CA  ALA A 275      49.891  42.349  49.684  1.00  0.00           C
ATOM   1249  HA  ALA A 275      49.328  43.230  49.954  1.00  0.00           H
ATOM   1250  CB  ALA A 275      51.223  42.316  50.456  1.00  0.00           C
ATOM   1251  HB1 ALA A 275      51.690  43.313  50.302  1.00  0.00           H
ATOM   1252  HB2 ALA A 275      51.197  42.161  51.555  1.00  0.00           H
ATOM   1253  HB3 ALA A 275      51.875  41.550  49.983  1.00  0.00           H
ATOM   1254  C   ALA A 275      50.169  42.268  48.200  1.00  0.00           C
ATOM   1255  O   ALA A 275      50.119  41.176  47.590  1.00  0.00           O
ATOM   1256  N   PRO A 276      50.370  43.322  47.422  1.00  0.00           N
ATOM   1257  CD  PRO A 276      51.034  43.243  46.135  1.00  0.00           C
ATOM   1258  HD1 PRO A 276      50.213  43.058  45.410  1.00  0.00           H
ATOM   1259  HD2 PRO A 276      51.672  42.335  46.075  1.00  0.00           H
ATOM   1260  CA  PRO A 276      50.337  44.708  47.889  1.00  0.00           C
ATOM   1261  HA  PRO A 276      51.084  44.787  48.665  1.00  0.00           H
ATOM   1262  CB  PRO A 276      50.671  45.541  46.633  1.00  0.00           C
ATOM   1263  HB1 PRO A 276      49.802  45.614  45.945  1.00  0.00           H
ATOM   1264  HB2 PRO A 276      51.108  46.533  46.876  1.00  0.00           H
ATOM   1265  CG  PRO A 276      51.659  44.547  45.888  1.00  0.00           C
ATOM   1266  HG1 PRO A 276      51.869  44.741  44.814  1.00  0.00           H
ATOM   1267  HG2 PRO A 276      52.673  44.717  46.310  1.00  0.00           H
ATOM   1268  C   PRO A 276      48.905  45.100  48.282  1.00  0.00           C
ATOM   1269  O   PRO A 276      47.931  44.349  47.986  1.00  0.00           O
ATOM   1270  N   HIS A 277      48.728  46.157  48.968  1.00  0.00           N
ATOM   1271  HN  HIS A 277      49.475  46.702  49.341  1.00  0.00           H
ATOM   1272  CA  HIS A 277      47.397  46.814  49.258  1.00  0.00           C
ATOM   1273  HA  HIS A 277      46.936  46.109  49.934  1.00  0.00           H
ATOM   1274  CB  HIS A 277      47.512  48.255  49.846  1.00  0.00           C
ATOM   1275  HB1 HIS A 277      48.209  48.152  50.705  1.00  0.00           H
ATOM   1276  HB2 HIS A 277      47.953  48.960  49.110  1.00  0.00           H
ATOM   1277  ND1 HIS A 277      45.479  47.902  51.238  1.00  0.00           N
ATOM   1278  CG  HIS A 277      46.189  48.804  50.486  1.00  0.00           C
ATOM   1279  CE1 HIS A 277      44.432  48.522  51.646  1.00  0.00           C
ATOM   1280  HE1 HIS A 277      43.744  48.127  52.394  1.00  0.00           H
ATOM   1281  NE2 HIS A 277      44.362  49.767  51.079  1.00  0.00           N
ATOM   1282  HE2 HIS A 277      43.714  50.478  51.353  1.00  0.00           H
ATOM   1283  CD2 HIS A 277      45.449  49.919  50.270  1.00  0.00           C
ATOM   1284  HD2 HIS A 277      45.690  50.815  49.712  1.00  0.00           H
ATOM   1285  C   HIS A 277      46.409  46.956  48.009  1.00  0.00           C
ATOM   1286  O   HIS A 277      46.805  46.853  46.906  1.00  0.00           O
ATOM   1287  N   ASN A 278      45.216  47.349  48.385  1.00  0.00           N
ATOM   1288  HN  ASN A 278      45.030  47.208  49.354  1.00  0.00           H
ATOM   1289  CA  ASN A 278      44.143  47.863  47.608  1.00  0.00           C
ATOM   1290  HA  ASN A 278      44.144  47.083  46.860  1.00  0.00           H
ATOM   1291  CB  ASN A 278      42.905  47.906  48.476  1.00  0.00           C
ATOM   1292  HB1 ASN A 278      42.858  46.976  49.081  1.00  0.00           H
ATOM   1293  HB2 ASN A 278      42.987  48.782  49.155  1.00  0.00           H
ATOM   1294  CG  ASN A 278      41.607  47.971  47.684  1.00  0.00           C
ATOM   1295  OD1 ASN A 278      41.589  47.794  46.459  1.00  0.00           O
ATOM   1296  ND2 ASN A 278      40.511  48.139  48.367  1.00  0.00           N
ATOM   1297 1HD2 ASN A 278      40.460  48.204  49.363  1.00  0.00           H
ATOM   1298 2HD2 ASN A 278      39.676  48.106  47.816  1.00  0.00           H
ATOM   1299  C   ASN A 278      44.487  49.175  46.882  1.00  0.00           C
ATOM   1300  O   ASN A 278      45.125  49.981  47.477  1.00  0.00           O
ATOM   1301  N   ASP A 279      44.037  49.423  45.628  1.00  0.00           N
ATOM   1302  HN  ASP A 279      43.540  48.670  45.204  1.00  0.00           H
ATOM   1303  CA  ASP A 279      44.455  50.509  44.772  1.00  0.00           C
ATOM   1304  HA  ASP A 279      45.496  50.708  44.983  1.00  0.00           H
ATOM   1305  CB  ASP A 279      44.224  50.137  43.278  1.00  0.00           C
ATOM   1306  HB1 ASP A 279      43.240  49.633  43.166  1.00  0.00           H
ATOM   1307  HB2 ASP A 279      44.429  51.041  42.664  1.00  0.00           H
ATOM   1308  CG  ASP A 279      45.263  49.136  42.957  1.00  0.00           C
ATOM   1309  OD1 ASP A 279      46.388  49.105  43.511  1.00  0.00           O
ATOM   1310  OD2 ASP A 279      44.972  48.241  42.095  1.00  0.00           O
ATOM   1311  C   ASP A 279      43.497  51.674  45.165  1.00  0.00           C
ATOM   1312  O   ASP A 279      43.791  52.828  44.762  1.00  0.00           O
ATOM   1313  N   SER A 280      42.359  51.513  45.895  1.00  0.00           N
ATOM   1314  HN  SER A 280      42.041  50.592  46.105  1.00  0.00           H
ATOM   1315  CA  SER A 280      41.714  52.685  46.459  1.00  0.00           C
ATOM   1316  HA  SER A 280      41.568  53.442  45.703  1.00  0.00           H
ATOM   1317  CB  SER A 280      40.299  52.425  47.115  1.00  0.00           C
ATOM   1318  HB1 SER A 280      39.869  53.311  47.630  1.00  0.00           H
ATOM   1319  HB2 SER A 280      39.565  52.095  46.349  1.00  0.00           H
ATOM   1320  OG  SER A 280      40.475  51.220  47.924  1.00  0.00           O
ATOM   1321  HG1 SER A 280      39.752  51.202  48.556  1.00  0.00           H
ATOM   1322  C   SER A 280      42.647  53.391  47.527  1.00  0.00           C
ATOM   1323  O   SER A 280      43.404  52.753  48.218  1.00  0.00           O
ATOM   1324  N   ALA A 281      42.643  54.730  47.460  1.00  0.00           N
ATOM   1325  HN  ALA A 281      42.076  55.299  46.869  1.00  0.00           H
ATOM   1326  CA  ALA A 281      43.255  55.595  48.430  1.00  0.00           C
ATOM   1327  HA  ALA A 281      44.229  55.136  48.516  1.00  0.00           H
ATOM   1328  CB  ALA A 281      43.320  57.017  47.982  1.00  0.00           C
ATOM   1329  HB1 ALA A 281      43.885  57.041  47.025  1.00  0.00           H
ATOM   1330  HB2 ALA A 281      42.310  57.413  47.741  1.00  0.00           H
ATOM   1331  HB3 ALA A 281      43.879  57.649  48.704  1.00  0.00           H
ATOM   1332  C   ALA A 281      42.432  55.533  49.726  1.00  0.00           C
ATOM   1333  O   ALA A 281      43.003  55.744  50.765  1.00  0.00           O
ATOM   1334  N   THR A 282      41.071  55.443  49.618  1.00  0.00           N
ATOM   1335  HN  THR A 282      40.593  55.296  48.756  1.00  0.00           H
ATOM   1336  CA  THR A 282      40.089  55.799  50.683  1.00  0.00           C
ATOM   1337  HA  THR A 282      40.082  54.928  51.322  1.00  0.00           H
ATOM   1338  CB  THR A 282      40.346  57.041  51.607  1.00  0.00           C
ATOM   1339  HB  THR A 282      41.341  56.971  52.097  1.00  0.00           H
ATOM   1340  OG1 THR A 282      39.565  57.104  52.752  1.00  0.00           O
ATOM   1341  HG1 THR A 282      40.118  57.014  53.532  1.00  0.00           H
ATOM   1342  CG2 THR A 282      40.267  58.396  50.885  1.00  0.00           C
ATOM   1343 1HG2 THR A 282      39.295  58.533  50.366  1.00  0.00           H
ATOM   1344 2HG2 THR A 282      40.291  59.234  51.614  1.00  0.00           H
ATOM   1345 3HG2 THR A 282      41.013  58.543  50.075  1.00  0.00           H
ATOM   1346  C   THR A 282      38.696  55.838  50.056  1.00  0.00           C
ATOM   1347  O   THR A 282      38.555  55.538  48.861  1.00  0.00           O
ATOM   1348  N   GLY A 283      37.554  56.308  50.750  1.00  0.00           N
ATOM   1349  HN  GLY A 283      37.711  56.573  51.698  1.00  0.00           H
ATOM   1350  CA  GLY A 283      36.148  56.471  50.214  1.00  0.00           C
ATOM   1351  HA1 GLY A 283      35.821  55.458  50.032  1.00  0.00           H
ATOM   1352  HA2 GLY A 283      35.504  56.917  50.958  1.00  0.00           H
ATOM   1353  C   GLY A 283      36.078  57.317  48.908  1.00  0.00           C
ATOM   1354  O   GLY A 283      36.924  58.158  48.693  1.00  0.00           O
ATOM   1355  N   GLU A 284      35.031  57.061  48.068  1.00  0.00           N
ATOM   1356  HN  GLU A 284      34.270  56.472  48.327  1.00  0.00           H
ATOM   1357  CA  GLU A 284      34.689  57.919  46.946  1.00  0.00           C
ATOM   1358  HA  GLU A 284      35.610  57.753  46.408  1.00  0.00           H
ATOM   1359  CB  GLU A 284      33.688  57.158  46.126  1.00  0.00           C
ATOM   1360  HB1 GLU A 284      33.965  56.084  46.077  1.00  0.00           H
ATOM   1361  HB2 GLU A 284      32.687  57.172  46.608  1.00  0.00           H
ATOM   1362  CG  GLU A 284      33.491  57.777  44.720  1.00  0.00           C
ATOM   1363  HG1 GLU A 284      33.008  58.778  44.734  1.00  0.00           H
ATOM   1364  HG2 GLU A 284      34.485  58.007  44.279  1.00  0.00           H
ATOM   1365  CD  GLU A 284      32.743  56.848  43.727  1.00  0.00           C
ATOM   1366  OE1 GLU A 284      31.509  57.088  43.551  1.00  0.00           O
ATOM   1367  OE2 GLU A 284      33.347  55.889  43.173  1.00  0.00           O
ATOM   1368  C   GLU A 284      34.613  59.447  47.056  1.00  0.00           C
ATOM   1369  O   GLU A 284      35.258  60.052  46.162  1.00  0.00           O
ATOM   1370  N   PRO A 285      33.867  60.097  47.938  1.00  0.00           N
ATOM   1371  CD  PRO A 285      32.933  59.369  48.851  1.00  0.00           C
ATOM   1372  HD1 PRO A 285      33.560  58.780  49.554  1.00  0.00           H
ATOM   1373  HD2 PRO A 285      32.220  58.689  48.338  1.00  0.00           H
ATOM   1374  CA  PRO A 285      33.868  61.538  48.345  1.00  0.00           C
ATOM   1375  HA  PRO A 285      33.310  62.099  47.610  1.00  0.00           H
ATOM   1376  CB  PRO A 285      33.158  61.657  49.688  1.00  0.00           C
ATOM   1377  HB1 PRO A 285      33.832  61.572  50.567  1.00  0.00           H
ATOM   1378  HB2 PRO A 285      32.677  62.655  49.765  1.00  0.00           H
ATOM   1379  CG  PRO A 285      32.164  60.488  49.633  1.00  0.00           C
ATOM   1380  HG1 PRO A 285      31.929  60.141  50.662  1.00  0.00           H
ATOM   1381  HG2 PRO A 285      31.223  60.729  49.094  1.00  0.00           H
ATOM   1382  C   PRO A 285      35.315  62.037  48.416  1.00  0.00           C
ATOM   1383  O   PRO A 285      36.174  61.279  48.935  1.00  0.00           O
ATOM   1384  N   GLU A 286      35.529  63.288  47.958  1.00  0.00           N
ATOM   1385  HN  GLU A 286      34.702  63.745  47.639  1.00  0.00           H
ATOM   1386  CA  GLU A 286      36.852  63.850  47.887  1.00  0.00           C
ATOM   1387  HA  GLU A 286      37.567  63.059  47.715  1.00  0.00           H
ATOM   1388  CB  GLU A 286      37.198  64.751  46.624  1.00  0.00           C
ATOM   1389  HB1 GLU A 286      36.538  65.640  46.720  1.00  0.00           H
ATOM   1390  HB2 GLU A 286      38.281  64.996  46.592  1.00  0.00           H
ATOM   1391  CG  GLU A 286      37.041  63.920  45.346  1.00  0.00           C
ATOM   1392  HG1 GLU A 286      37.837  63.165  45.174  1.00  0.00           H
ATOM   1393  HG2 GLU A 286      36.055  63.408  45.371  1.00  0.00           H
ATOM   1394  CD  GLU A 286      37.064  64.710  44.060  1.00  0.00           C
ATOM   1395  OE1 GLU A 286      36.157  64.421  43.198  1.00  0.00           O
ATOM   1396  OE2 GLU A 286      37.950  65.609  43.905  1.00  0.00           O
ATOM   1397  C   GLU A 286      37.226  64.489  49.134  1.00  0.00           C
ATOM   1398  O   GLU A 286      36.366  65.046  49.870  1.00  0.00           O
ATOM   1399  N   ALA A 287      38.565  64.416  49.432  1.00  0.00           N
ATOM   1400  HN  ALA A 287      39.065  63.707  48.941  1.00  0.00           H
ATOM   1401  CA  ALA A 287      39.187  65.022  50.538  1.00  0.00           C
ATOM   1402  HA  ALA A 287      40.216  64.786  50.311  1.00  0.00           H
ATOM   1403  CB  ALA A 287      39.252  66.582  50.341  1.00  0.00           C
ATOM   1404  HB1 ALA A 287      40.129  67.042  50.844  1.00  0.00           H
ATOM   1405  HB2 ALA A 287      39.338  66.796  49.254  1.00  0.00           H
ATOM   1406  HB3 ALA A 287      38.319  67.073  50.691  1.00  0.00           H
ATOM   1407  C   ALA A 287      38.829  64.599  51.985  1.00  0.00           C
ATOM   1408  O   ALA A 287      39.143  65.232  53.044  1.00  0.00           O
ATOM   1409  N   SER A 288      38.108  63.474  52.102  1.00  0.00           N
ATOM   1410  HN  SER A 288      37.906  62.923  51.296  1.00  0.00           H
ATOM   1411  CA  SER A 288      37.680  62.861  53.377  1.00  0.00           C
ATOM   1412  HA  SER A 288      38.121  63.427  54.185  1.00  0.00           H
ATOM   1413  CB  SER A 288      36.169  63.104  53.464  1.00  0.00           C
ATOM   1414  HB1 SER A 288      35.991  64.138  53.099  1.00  0.00           H
ATOM   1415  HB2 SER A 288      35.462  62.511  52.845  1.00  0.00           H
ATOM   1416  OG  SER A 288      35.724  62.944  54.835  1.00  0.00           O
ATOM   1417  HG1 SER A 288      35.871  63.727  55.371  1.00  0.00           H
ATOM   1418  C   SER A 288      37.949  61.359  53.378  1.00  0.00           C
ATOM   1419  O   SER A 288      37.758  60.675  52.340  1.00  0.00           O
ATOM   1420  N   SER A 289      38.395  60.826  54.500  1.00  0.00           N
ATOM   1421  HN  SER A 289      38.769  61.482  55.151  1.00  0.00           H
ATOM   1422  CA  SER A 289      38.373  59.394  54.813  1.00  0.00           C
ATOM   1423  HA  SER A 289      39.006  58.973  54.047  1.00  0.00           H
ATOM   1424  CB  SER A 289      38.799  59.239  56.330  1.00  0.00           C
ATOM   1425  HB1 SER A 289      39.837  59.630  56.387  1.00  0.00           H
ATOM   1426  HB2 SER A 289      38.224  59.849  57.058  1.00  0.00           H
ATOM   1427  OG  SER A 289      38.697  57.913  56.820  1.00  0.00           O
ATOM   1428  HG1 SER A 289      39.411  57.800  57.452  1.00  0.00           H
ATOM   1429  C   SER A 289      36.985  58.730  54.628  1.00  0.00           C
ATOM   1430  O   SER A 289      35.932  59.321  54.792  1.00  0.00           O
ATOM   1431  N   GLY A 290      37.060  57.457  54.194  1.00  0.00           N
ATOM   1432  HN  GLY A 290      37.944  56.998  54.150  1.00  0.00           H
ATOM   1433  CA  GLY A 290      35.945  56.695  53.748  1.00  0.00           C
ATOM   1434  HA1 GLY A 290      35.367  57.185  52.978  1.00  0.00           H
ATOM   1435  HA2 GLY A 290      36.326  55.735  53.432  1.00  0.00           H
ATOM   1436  C   GLY A 290      34.910  56.406  54.818  1.00  0.00           C
ATOM   1437  O   GLY A 290      34.884  56.893  55.931  1.00  0.00           O
ATOM   1438  N   SER A 291      33.965  55.518  54.439  1.00  0.00           N
ATOM   1439  HN  SER A 291      34.045  55.107  53.534  1.00  0.00           H
ATOM   1440  CA  SER A 291      32.788  55.156  55.141  1.00  0.00           C
ATOM   1441  HA  SER A 291      32.700  55.730  56.052  1.00  0.00           H
ATOM   1442  CB  SER A 291      31.443  55.251  54.362  1.00  0.00           C
ATOM   1443  HB1 SER A 291      31.274  56.300  54.037  1.00  0.00           H
ATOM   1444  HB2 SER A 291      31.360  54.634  53.442  1.00  0.00           H
ATOM   1445  OG  SER A 291      30.326  54.951  55.219  1.00  0.00           O
ATOM   1446  HG1 SER A 291      30.044  54.106  54.862  1.00  0.00           H
ATOM   1447  C   SER A 291      32.929  53.731  55.608  1.00  0.00           C
ATOM   1448  O   SER A 291      32.923  52.799  54.775  1.00  0.00           O
ATOM   1449  N   GLY A 292      32.883  53.540  56.925  1.00  0.00           N
ATOM   1450  HN  GLY A 292      32.653  54.317  57.506  1.00  0.00           H
ATOM   1451  CA  GLY A 292      33.239  52.260  57.651  1.00  0.00           C
ATOM   1452  HA1 GLY A 292      32.812  52.188  58.641  1.00  0.00           H
ATOM   1453  HA2 GLY A 292      33.039  51.372  57.070  1.00  0.00           H
ATOM   1454  C   GLY A 292      34.782  52.131  57.954  1.00  0.00           C
ATOM   1455  O   GLY A 292      35.522  53.049  57.540  1.00  0.00           O
ATOM   1456  N   PRO A 293      35.285  51.166  58.698  1.00  0.00           N
ATOM   1457  CD  PRO A 293      34.450  50.073  59.210  1.00  0.00           C
ATOM   1458  HD1 PRO A 293      34.327  49.432  58.311  1.00  0.00           H
ATOM   1459  HD2 PRO A 293      33.490  50.413  59.655  1.00  0.00           H
ATOM   1460  CA  PRO A 293      36.697  50.892  59.035  1.00  0.00           C
ATOM   1461  HA  PRO A 293      36.982  51.759  59.613  1.00  0.00           H
ATOM   1462  CB  PRO A 293      36.692  49.437  59.665  1.00  0.00           C
ATOM   1463  HB1 PRO A 293      36.727  48.627  58.905  1.00  0.00           H
ATOM   1464  HB2 PRO A 293      37.472  49.366  60.453  1.00  0.00           H
ATOM   1465  CG  PRO A 293      35.308  49.345  60.306  1.00  0.00           C
ATOM   1466  HG1 PRO A 293      35.003  48.277  60.338  1.00  0.00           H
ATOM   1467  HG2 PRO A 293      35.189  49.850  61.288  1.00  0.00           H
ATOM   1468  C   PRO A 293      37.678  50.875  57.886  1.00  0.00           C
ATOM   1469  O   PRO A 293      37.253  50.325  56.844  1.00  0.00           O
ATOM   1470  N   PRO A 294      38.946  51.440  57.836  1.00  0.00           N
ATOM   1471  CD  PRO A 294      39.490  52.462  58.722  1.00  0.00           C
ATOM   1472  HD1 PRO A 294      39.830  52.001  59.674  1.00  0.00           H
ATOM   1473  HD2 PRO A 294      38.855  53.332  58.993  1.00  0.00           H
ATOM   1474  CA  PRO A 294      39.846  51.254  56.682  1.00  0.00           C
ATOM   1475  HA  PRO A 294      39.359  51.905  55.972  1.00  0.00           H
ATOM   1476  CB  PRO A 294      41.199  51.807  57.198  1.00  0.00           C
ATOM   1477  HB1 PRO A 294      41.697  51.132  57.927  1.00  0.00           H
ATOM   1478  HB2 PRO A 294      41.882  51.953  56.334  1.00  0.00           H
ATOM   1479  CG  PRO A 294      40.640  53.059  57.893  1.00  0.00           C
ATOM   1480  HG1 PRO A 294      41.378  53.503  58.595  1.00  0.00           H
ATOM   1481  HG2 PRO A 294      40.229  53.823  57.200  1.00  0.00           H
ATOM   1482  C   PRO A 294      40.060  49.897  55.993  1.00  0.00           C
ATOM   1483  O   PRO A 294      40.026  48.887  56.644  1.00  0.00           O
ATOM   1484  N   SER A 295      40.281  49.891  54.669  1.00  0.00           N
ATOM   1485  HN  SER A 295      40.384  50.803  54.280  1.00  0.00           H
ATOM   1486  CA  SER A 295      40.387  48.721  53.802  1.00  0.00           C
ATOM   1487  HA  SER A 295      39.421  48.273  53.981  1.00  0.00           H
ATOM   1488  CB  SER A 295      40.613  49.279  52.388  1.00  0.00           C
ATOM   1489  HB1 SER A 295      39.794  50.015  52.240  1.00  0.00           H
ATOM   1490  HB2 SER A 295      41.597  49.790  52.318  1.00  0.00           H
ATOM   1491  OG  SER A 295      40.365  48.313  51.383  1.00  0.00           O
ATOM   1492  HG1 SER A 295      39.428  48.117  51.305  1.00  0.00           H
ATOM   1493  C   SER A 295      41.442  47.755  54.211  1.00  0.00           C
ATOM   1494  O   SER A 295      41.258  46.563  54.271  1.00  0.00           O
ATOM   1495  N   GLY A 296      42.645  48.300  54.622  1.00  0.00           N
ATOM   1496  HN  GLY A 296      42.768  49.289  54.657  1.00  0.00           H
ATOM   1497  CA  GLY A 296      43.902  47.558  54.917  1.00  0.00           C
ATOM   1498  HA1 GLY A 296      44.058  46.732  54.240  1.00  0.00           H
ATOM   1499  HA2 GLY A 296      44.634  48.353  54.918  1.00  0.00           H
ATOM   1500  C   GLY A 296      43.865  46.982  56.331  1.00  0.00           C
ATOM   1501  O   GLY A 296      44.779  46.307  56.785  1.00  0.00           O
ATOM   1502  N   GLY A 297      42.784  47.375  57.108  1.00  0.00           N
ATOM   1503  HN  GLY A 297      42.204  48.034  56.635  1.00  0.00           H
ATOM   1504  CA  GLY A 297      42.616  47.014  58.513  1.00  0.00           C
ATOM   1505  HA1 GLY A 297      43.602  47.027  58.956  1.00  0.00           H
ATOM   1506  HA2 GLY A 297      41.844  47.693  58.841  1.00  0.00           H
ATOM   1507  C   GLY A 297      42.128  45.610  58.811  1.00  0.00           C
ATOM   1508  O   GLY A 297      42.147  44.724  57.959  1.00  0.00           O
ATOM   1509  N   ALA A 298      41.696  45.253  60.088  1.00  0.00           N
ATOM   1510  HN  ALA A 298      41.870  45.945  60.784  1.00  0.00           H
ATOM   1511  CA  ALA A 298      41.375  43.928  60.458  1.00  0.00           C
ATOM   1512  HA  ALA A 298      41.920  43.207  59.866  1.00  0.00           H
ATOM   1513  CB  ALA A 298      42.014  43.612  61.857  1.00  0.00           C
ATOM   1514  HB1 ALA A 298      41.730  42.704  62.432  1.00  0.00           H
ATOM   1515  HB2 ALA A 298      43.122  43.690  61.846  1.00  0.00           H
ATOM   1516  HB3 ALA A 298      41.662  44.408  62.548  1.00  0.00           H
ATOM   1517  C   ALA A 298      39.832  43.513  60.605  1.00  0.00           C
ATOM   1518  O   ALA A 298      39.514  42.331  60.910  1.00  0.00           O
ATOM   1519  N   LEU A 299      38.907  44.466  60.227  1.00  0.00           N
ATOM   1520  HN  LEU A 299      39.130  45.368  59.865  1.00  0.00           H
ATOM   1521  CA  LEU A 299      37.462  44.266  60.304  1.00  0.00           C
ATOM   1522  HA  LEU A 299      37.289  43.308  60.771  1.00  0.00           H
ATOM   1523  CB  LEU A 299      36.669  45.322  61.093  1.00  0.00           C
ATOM   1524  HB1 LEU A 299      36.661  46.285  60.539  1.00  0.00           H
ATOM   1525  HB2 LEU A 299      35.655  44.934  61.327  1.00  0.00           H
ATOM   1526  CG  LEU A 299      37.084  45.558  62.621  1.00  0.00           C
ATOM   1527  HG  LEU A 299      38.172  45.708  62.451  1.00  0.00           H
ATOM   1528  CD1 LEU A 299      36.679  46.871  63.334  1.00  0.00           C
ATOM   1529 1HD1 LEU A 299      35.590  47.039  63.474  1.00  0.00           H
ATOM   1530 2HD1 LEU A 299      37.111  46.801  64.355  1.00  0.00           H
ATOM   1531 3HD1 LEU A 299      37.055  47.755  62.776  1.00  0.00           H
ATOM   1532  CD2 LEU A 299      36.816  44.346  63.451  1.00  0.00           C
ATOM   1533 1HD2 LEU A 299      35.771  44.083  63.183  1.00  0.00           H
ATOM   1534 2HD2 LEU A 299      37.414  43.471  63.117  1.00  0.00           H
ATOM   1535 3HD2 LEU A 299      36.739  44.524  64.545  1.00  0.00           H
ATOM   1536  C   LEU A 299      36.861  43.948  58.938  1.00  0.00           C
ATOM   1537  O   LEU A 299      35.954  43.150  58.671  1.00  0.00           O
ATOM   1538  N   GLY A 300      37.303  44.752  57.904  1.00  0.00           N
ATOM   1539  HN  GLY A 300      37.858  45.552  58.118  1.00  0.00           H
ATOM   1540  CA  GLY A 300      36.955  44.683  56.511  1.00  0.00           C
ATOM   1541  HA1 GLY A 300      35.892  44.869  56.462  1.00  0.00           H
ATOM   1542  HA2 GLY A 300      37.385  45.482  55.926  1.00  0.00           H
ATOM   1543  C   GLY A 300      37.226  43.420  55.738  1.00  0.00           C
ATOM   1544  O   GLY A 300      37.795  42.486  56.341  1.00  0.00           O
ATOM   1545  N   PRO A 301      36.993  43.345  54.466  1.00  0.00           N
ATOM   1546  CD  PRO A 301      36.396  44.421  53.660  1.00  0.00           C
ATOM   1547  HD1 PRO A 301      37.091  45.285  53.595  1.00  0.00           H
ATOM   1548  HD2 PRO A 301      35.431  44.701  54.133  1.00  0.00           H
ATOM   1549  CA  PRO A 301      36.910  42.049  53.840  1.00  0.00           C
ATOM   1550  HA  PRO A 301      36.380  41.336  54.453  1.00  0.00           H
ATOM   1551  CB  PRO A 301      36.021  42.301  52.565  1.00  0.00           C
ATOM   1552  HB1 PRO A 301      36.367  41.798  51.637  1.00  0.00           H
ATOM   1553  HB2 PRO A 301      34.944  42.057  52.681  1.00  0.00           H
ATOM   1554  CG  PRO A 301      36.191  43.828  52.290  1.00  0.00           C
ATOM   1555  HG1 PRO A 301      37.101  43.808  51.654  1.00  0.00           H
ATOM   1556  HG2 PRO A 301      35.311  44.284  51.789  1.00  0.00           H
ATOM   1557  C   PRO A 301      38.260  41.524  53.345  1.00  0.00           C
ATOM   1558  O   PRO A 301      38.312  40.398  52.916  1.00  0.00           O
ATOM   1559  N   ARG A 302      39.383  42.309  53.448  1.00  0.00           N
ATOM   1560  HN  ARG A 302      39.265  43.085  54.063  1.00  0.00           H
ATOM   1561  CA  ARG A 302      40.575  42.075  52.681  1.00  0.00           C
ATOM   1562  HA  ARG A 302      40.242  41.812  51.688  1.00  0.00           H
ATOM   1563  CB  ARG A 302      41.449  43.357  52.769  1.00  0.00           C
ATOM   1564  HB1 ARG A 302      41.469  43.561  53.861  1.00  0.00           H
ATOM   1565  HB2 ARG A 302      42.487  43.238  52.393  1.00  0.00           H
ATOM   1566  CG  ARG A 302      40.796  44.506  51.940  1.00  0.00           C
ATOM   1567  HG1 ARG A 302      39.791  44.740  52.351  1.00  0.00           H
ATOM   1568  HG2 ARG A 302      41.496  45.338  52.167  1.00  0.00           H
ATOM   1569  CD  ARG A 302      40.420  44.268  50.490  1.00  0.00           C
ATOM   1570  HD1 ARG A 302      39.850  43.339  50.275  1.00  0.00           H
ATOM   1571  HD2 ARG A 302      39.743  45.091  50.174  1.00  0.00           H
ATOM   1572  NE  ARG A 302      41.706  44.289  49.837  1.00  0.00           N
ATOM   1573  HE  ARG A 302      42.446  44.711  50.361  1.00  0.00           H
ATOM   1574  CZ  ARG A 302      41.890  43.885  48.629  1.00  0.00           C
ATOM   1575  NH1 ARG A 302      40.913  43.566  47.792  1.00  0.00           N
ATOM   1576 1HH1 ARG A 302      40.016  43.952  48.009  1.00  0.00           H
ATOM   1577 2HH1 ARG A 302      41.005  43.175  46.876  1.00  0.00           H
ATOM   1578  NH2 ARG A 302      43.062  43.805  48.104  1.00  0.00           N
ATOM   1579 1HH2 ARG A 302      43.867  43.913  48.687  1.00  0.00           H
ATOM   1580 2HH2 ARG A 302      43.070  43.643  47.117  1.00  0.00           H
ATOM   1581  C   ARG A 302      41.476  40.883  53.142  1.00  0.00           C
ATOM   1582  O   ARG A 302      42.120  40.203  52.298  1.00  0.00           O
ATOM   1583  N   ALA A 303      41.486  40.578  54.446  1.00  0.00           N
ATOM   1584  HN  ALA A 303      40.880  41.135  55.009  1.00  0.00           H
ATOM   1585  CA  ALA A 303      41.994  39.342  54.972  1.00  0.00           C
ATOM   1586  HA  ALA A 303      42.978  39.240  54.537  1.00  0.00           H
ATOM   1587  CB  ALA A 303      42.220  39.427  56.510  1.00  0.00           C
ATOM   1588  HB1 ALA A 303      41.252  39.297  57.040  1.00  0.00           H
ATOM   1589  HB2 ALA A 303      43.072  38.797  56.845  1.00  0.00           H
ATOM   1590  HB3 ALA A 303      42.625  40.445  56.693  1.00  0.00           H
ATOM   1591  C   ALA A 303      41.050  38.152  54.513  1.00  0.00           C
ATOM   1592  O   ALA A 303      39.828  38.204  54.517  1.00  0.00           O
ATOM   1593  N   LEU A 304      41.780  37.094  54.209  1.00  0.00           N
ATOM   1594  HN  LEU A 304      42.760  37.098  54.397  1.00  0.00           H
ATOM   1595  CA  LEU A 304      41.186  35.933  53.614  1.00  0.00           C
ATOM   1596  HA  LEU A 304      40.150  35.792  53.885  1.00  0.00           H
ATOM   1597  CB  LEU A 304      41.350  35.862  52.065  1.00  0.00           C
ATOM   1598  HB1 LEU A 304      40.994  34.840  51.810  1.00  0.00           H
ATOM   1599  HB2 LEU A 304      40.700  36.600  51.547  1.00  0.00           H
ATOM   1600  CG  LEU A 304      42.842  36.091  51.545  1.00  0.00           C
ATOM   1601  HG  LEU A 304      43.563  36.377  52.340  1.00  0.00           H
ATOM   1602  CD1 LEU A 304      43.354  34.740  50.934  1.00  0.00           C
ATOM   1603 1HD1 LEU A 304      44.389  34.977  50.605  1.00  0.00           H
ATOM   1604 2HD1 LEU A 304      43.393  33.939  51.704  1.00  0.00           H
ATOM   1605 3HD1 LEU A 304      42.744  34.413  50.065  1.00  0.00           H
ATOM   1606  CD2 LEU A 304      42.871  37.245  50.524  1.00  0.00           C
ATOM   1607 1HD2 LEU A 304      42.703  38.244  50.979  1.00  0.00           H
ATOM   1608 2HD2 LEU A 304      43.851  37.268  50.001  1.00  0.00           H
ATOM   1609 3HD2 LEU A 304      42.136  37.036  49.717  1.00  0.00           H
ATOM   1610  C   LEU A 304      41.725  34.628  54.239  1.00  0.00           C
ATOM   1611  O   LEU A 304      42.780  34.577  54.899  1.00  0.00           O
ATOM   1612  N   PHE A 305      41.076  33.520  54.099  1.00  0.00           N
ATOM   1613  HN  PHE A 305      40.193  33.496  53.636  1.00  0.00           H
ATOM   1614  CA  PHE A 305      41.610  32.308  54.759  1.00  0.00           C
ATOM   1615  HA  PHE A 305      41.735  32.452  55.822  1.00  0.00           H
ATOM   1616  CB  PHE A 305      40.634  31.125  54.628  1.00  0.00           C
ATOM   1617  HB1 PHE A 305      40.506  30.982  53.534  1.00  0.00           H
ATOM   1618  HB2 PHE A 305      40.931  30.197  55.162  1.00  0.00           H
ATOM   1619  CG  PHE A 305      39.360  31.535  55.299  1.00  0.00           C
ATOM   1620  CD1 PHE A 305      39.276  32.075  56.624  1.00  0.00           C
ATOM   1621  HD1 PHE A 305      40.166  32.435  57.118  1.00  0.00           H
ATOM   1622  CE1 PHE A 305      38.008  32.454  57.109  1.00  0.00           C
ATOM   1623  HE1 PHE A 305      37.895  32.836  58.112  1.00  0.00           H
ATOM   1624  CZ  PHE A 305      36.914  31.992  56.462  1.00  0.00           C
ATOM   1625  HZ  PHE A 305      35.941  32.073  56.923  1.00  0.00           H
ATOM   1626  CD2 PHE A 305      38.219  31.167  54.628  1.00  0.00           C
ATOM   1627  HD2 PHE A 305      38.175  30.885  53.586  1.00  0.00           H
ATOM   1628  CE2 PHE A 305      36.983  31.413  55.200  1.00  0.00           C
ATOM   1629  HE2 PHE A 305      36.090  31.045  54.718  1.00  0.00           H
ATOM   1630  C   PHE A 305      42.974  31.712  54.384  1.00  0.00           C
ATOM   1631  O   PHE A 305      43.381  31.719  53.221  1.00  0.00           O
ATOM   1632  N   ALA A 306      43.690  31.184  55.408  1.00  0.00           N
ATOM   1633  HN  ALA A 306      43.319  31.261  56.330  1.00  0.00           H
ATOM   1634  CA  ALA A 306      45.135  30.700  55.232  1.00  0.00           C
ATOM   1635  HA  ALA A 306      45.756  31.567  55.063  1.00  0.00           H
ATOM   1636  CB  ALA A 306      45.549  30.094  56.596  1.00  0.00           C
ATOM   1637  HB1 ALA A 306      44.682  29.418  56.756  1.00  0.00           H
ATOM   1638  HB2 ALA A 306      46.430  29.427  56.483  1.00  0.00           H
ATOM   1639  HB3 ALA A 306      45.718  30.793  57.443  1.00  0.00           H
ATOM   1640  C   ALA A 306      45.439  29.640  54.166  1.00  0.00           C
ATOM   1641  O   ALA A 306      46.516  29.484  53.643  1.00  0.00           O
ATOM   1642  N   SER A 307      44.409  28.837  53.811  1.00  0.00           N
ATOM   1643  HN  SER A 307      43.568  29.112  54.270  1.00  0.00           H
ATOM   1644  CA  SER A 307      44.462  27.749  52.878  1.00  0.00           C
ATOM   1645  HA  SER A 307      45.475  27.587  52.539  1.00  0.00           H
ATOM   1646  CB  SER A 307      43.949  26.315  53.427  1.00  0.00           C
ATOM   1647  HB1 SER A 307      44.444  25.477  52.893  1.00  0.00           H
ATOM   1648  HB2 SER A 307      44.382  26.191  54.443  1.00  0.00           H
ATOM   1649  OG  SER A 307      42.594  26.123  53.445  1.00  0.00           O
ATOM   1650  HG1 SER A 307      42.349  25.238  53.727  1.00  0.00           H
ATOM   1651  C   SER A 307      43.723  28.173  51.650  1.00  0.00           C
ATOM   1652  O   SER A 307      43.561  27.361  50.721  1.00  0.00           O
ATOM   1653  N   ARG A 308      43.241  29.406  51.551  1.00  0.00           N
ATOM   1654  HN  ARG A 308      43.368  29.984  52.353  1.00  0.00           H
ATOM   1655  CA  ARG A 308      42.739  29.970  50.351  1.00  0.00           C
ATOM   1656  HA  ARG A 308      42.278  29.326  49.617  1.00  0.00           H
ATOM   1657  CB  ARG A 308      41.584  31.036  50.653  1.00  0.00           C
ATOM   1658  HB1 ARG A 308      40.877  30.517  51.335  1.00  0.00           H
ATOM   1659  HB2 ARG A 308      42.000  31.874  51.252  1.00  0.00           H
ATOM   1660  CG  ARG A 308      40.883  31.447  49.373  1.00  0.00           C
ATOM   1661  HG1 ARG A 308      40.375  32.425  49.511  1.00  0.00           H
ATOM   1662  HG2 ARG A 308      41.594  31.529  48.523  1.00  0.00           H
ATOM   1663  CD  ARG A 308      39.863  30.394  48.831  1.00  0.00           C
ATOM   1664  HD1 ARG A 308      40.381  29.457  48.532  1.00  0.00           H
ATOM   1665  HD2 ARG A 308      39.147  30.210  49.660  1.00  0.00           H
ATOM   1666  NE  ARG A 308      39.235  31.102  47.642  1.00  0.00           N
ATOM   1667  HE  ARG A 308      39.186  32.100  47.605  1.00  0.00           H
ATOM   1668  CZ  ARG A 308      38.452  30.415  46.737  1.00  0.00           C
ATOM   1669  NH1 ARG A 308      38.318  29.157  46.770  1.00  0.00           N
ATOM   1670 1HH1 ARG A 308      38.707  28.736  47.590  1.00  0.00           H
ATOM   1671 2HH1 ARG A 308      37.481  28.825  46.337  1.00  0.00           H
ATOM   1672  NH2 ARG A 308      37.780  31.092  45.852  1.00  0.00           N
ATOM   1673 1HH2 ARG A 308      37.720  32.080  45.990  1.00  0.00           H
ATOM   1674 2HH2 ARG A 308      37.276  30.664  45.101  1.00  0.00           H
ATOM   1675  C   ARG A 308      43.966  30.710  49.675  1.00  0.00           C
ATOM   1676  O   ARG A 308      43.941  31.020  48.520  1.00  0.00           O
ATOM   1677  N   VAL A 309      45.061  31.014  50.467  1.00  0.00           N
ATOM   1678  HN  VAL A 309      45.172  30.820  51.438  1.00  0.00           H
ATOM   1679  CA  VAL A 309      46.252  31.620  49.945  1.00  0.00           C
ATOM   1680  HA  VAL A 309      45.972  32.521  49.419  1.00  0.00           H
ATOM   1681  CB  VAL A 309      47.199  31.998  51.059  1.00  0.00           C
ATOM   1682  HB  VAL A 309      47.270  31.162  51.787  1.00  0.00           H
ATOM   1683  CG1 VAL A 309      48.532  32.468  50.438  1.00  0.00           C
ATOM   1684 1HG1 VAL A 309      49.271  32.745  51.221  1.00  0.00           H
ATOM   1685 2HG1 VAL A 309      49.041  31.702  49.816  1.00  0.00           H
ATOM   1686 3HG1 VAL A 309      48.344  33.386  49.840  1.00  0.00           H
ATOM   1687  CG2 VAL A 309      46.566  33.179  51.830  1.00  0.00           C
ATOM   1688 1HG2 VAL A 309      45.764  32.854  52.527  1.00  0.00           H
ATOM   1689 2HG2 VAL A 309      47.272  33.641  52.552  1.00  0.00           H
ATOM   1690 3HG2 VAL A 309      46.085  33.937  51.175  1.00  0.00           H
ATOM   1691  C   VAL A 309      46.913  30.765  48.797  1.00  0.00           C
ATOM   1692  O   VAL A 309      47.176  29.570  48.999  1.00  0.00           O
ATOM   1693  N   ARG A 310      47.191  31.291  47.595  1.00  0.00           N
ATOM   1694  HN  ARG A 310      46.980  32.239  47.368  1.00  0.00           H
ATOM   1695  CA  ARG A 310      47.764  30.572  46.514  1.00  0.00           C
ATOM   1696  HA  ARG A 310      47.651  29.519  46.722  1.00  0.00           H
ATOM   1697  CB  ARG A 310      47.114  30.766  45.159  1.00  0.00           C
ATOM   1698  HB1 ARG A 310      47.354  31.801  44.836  1.00  0.00           H
ATOM   1699  HB2 ARG A 310      47.544  29.991  44.489  1.00  0.00           H
ATOM   1700  CG  ARG A 310      45.496  30.556  45.210  1.00  0.00           C
ATOM   1701  HG1 ARG A 310      45.028  31.427  45.718  1.00  0.00           H
ATOM   1702  HG2 ARG A 310      45.353  30.609  44.109  1.00  0.00           H
ATOM   1703  CD  ARG A 310      45.154  29.330  45.972  1.00  0.00           C
ATOM   1704  HD1 ARG A 310      45.697  28.445  45.577  1.00  0.00           H
ATOM   1705  HD2 ARG A 310      45.372  29.433  47.056  1.00  0.00           H
ATOM   1706  NE  ARG A 310      43.698  29.143  45.918  1.00  0.00           N
ATOM   1707  HE  ARG A 310      43.147  29.877  45.521  1.00  0.00           H
ATOM   1708  CZ  ARG A 310      42.994  28.164  46.481  1.00  0.00           C
ATOM   1709  NH1 ARG A 310      43.515  27.343  47.381  1.00  0.00           N
ATOM   1710 1HH1 ARG A 310      44.485  27.271  47.612  1.00  0.00           H
ATOM   1711 2HH1 ARG A 310      42.980  26.719  47.950  1.00  0.00           H
ATOM   1712  NH2 ARG A 310      41.741  27.999  46.054  1.00  0.00           N
ATOM   1713 1HH2 ARG A 310      41.595  28.306  45.114  1.00  0.00           H
ATOM   1714 2HH2 ARG A 310      41.235  27.158  46.244  1.00  0.00           H
ATOM   1715  C   ARG A 310      49.290  30.859  46.410  1.00  0.00           C
ATOM   1716  O   ARG A 310      49.686  32.028  46.557  1.00  0.00           O
ATOM   1717  N   PRO A 311      50.203  29.893  46.222  1.00  0.00           N
ATOM   1718  CD  PRO A 311      50.004  28.486  46.343  1.00  0.00           C
ATOM   1719  HD1 PRO A 311      49.343  28.075  45.550  1.00  0.00           H
ATOM   1720  HD2 PRO A 311      49.544  28.238  47.323  1.00  0.00           H
ATOM   1721  CA  PRO A 311      51.520  30.207  45.738  1.00  0.00           C
ATOM   1722  HA  PRO A 311      52.049  30.566  46.608  1.00  0.00           H
ATOM   1723  CB  PRO A 311      52.046  28.809  45.272  1.00  0.00           C
ATOM   1724  HB1 PRO A 311      51.866  28.507  44.219  1.00  0.00           H
ATOM   1725  HB2 PRO A 311      53.156  28.819  45.307  1.00  0.00           H
ATOM   1726  CG  PRO A 311      51.379  27.826  46.228  1.00  0.00           C
ATOM   1727  HG1 PRO A 311      51.394  26.802  45.797  1.00  0.00           H
ATOM   1728  HG2 PRO A 311      51.678  27.793  47.297  1.00  0.00           H
ATOM   1729  C   PRO A 311      51.755  31.385  44.740  1.00  0.00           C
ATOM   1730  O   PRO A 311      51.189  31.353  43.638  1.00  0.00           O
ATOM   1731  N   GLY A 312      52.601  32.427  45.091  1.00  0.00           N
ATOM   1732  HN  GLY A 312      53.104  32.370  45.950  1.00  0.00           H
ATOM   1733  CA  GLY A 312      53.008  33.523  44.259  1.00  0.00           C
ATOM   1734  HA1 GLY A 312      54.063  33.697  44.408  1.00  0.00           H
ATOM   1735  HA2 GLY A 312      52.818  33.353  43.209  1.00  0.00           H
ATOM   1736  C   GLY A 312      52.368  34.863  44.692  1.00  0.00           C
ATOM   1737  O   GLY A 312      52.926  35.885  44.254  1.00  0.00           O
ATOM   1738  N   GLN A 313      51.264  34.828  45.540  1.00  0.00           N
ATOM   1739  HN  GLN A 313      50.639  34.051  45.544  1.00  0.00           H
ATOM   1740  CA  GLN A 313      50.677  36.062  46.063  1.00  0.00           C
ATOM   1741  HA  GLN A 313      50.581  36.788  45.270  1.00  0.00           H
ATOM   1742  CB  GLN A 313      49.362  35.869  46.803  1.00  0.00           C
ATOM   1743  HB1 GLN A 313      49.480  35.252  47.719  1.00  0.00           H
ATOM   1744  HB2 GLN A 313      48.929  36.832  47.147  1.00  0.00           H
ATOM   1745  CG  GLN A 313      48.346  35.231  45.849  1.00  0.00           C
ATOM   1746  HG1 GLN A 313      48.201  35.923  44.991  1.00  0.00           H
ATOM   1747  HG2 GLN A 313      48.799  34.274  45.514  1.00  0.00           H
ATOM   1748  CD  GLN A 313      47.090  35.113  46.628  1.00  0.00           C
ATOM   1749  OE1 GLN A 313      46.767  34.069  47.144  1.00  0.00           O
ATOM   1750  NE2 GLN A 313      46.191  36.207  46.476  1.00  0.00           N
ATOM   1751 1HE2 GLN A 313      46.633  37.081  46.271  1.00  0.00           H
ATOM   1752 2HE2 GLN A 313      45.257  36.080  46.811  1.00  0.00           H
ATOM   1753  C   GLN A 313      51.686  36.671  47.058  1.00  0.00           C
ATOM   1754  O   GLN A 313      52.483  35.961  47.624  1.00  0.00           O
ATOM   1755  N   ARG A 314      51.677  38.025  47.258  1.00  0.00           N
ATOM   1756  HN  ARG A 314      50.992  38.589  46.804  1.00  0.00           H
ATOM   1757  CA  ARG A 314      52.515  38.518  48.365  1.00  0.00           C
ATOM   1758  HA  ARG A 314      53.296  37.813  48.609  1.00  0.00           H
ATOM   1759  CB  ARG A 314      53.202  39.854  47.913  1.00  0.00           C
ATOM   1760  HB1 ARG A 314      52.467  40.562  47.475  1.00  0.00           H
ATOM   1761  HB2 ARG A 314      53.698  40.406  48.740  1.00  0.00           H
ATOM   1762  CG  ARG A 314      54.338  39.701  46.859  1.00  0.00           C
ATOM   1763  HG1 ARG A 314      54.681  40.744  46.692  1.00  0.00           H
ATOM   1764  HG2 ARG A 314      55.191  39.130  47.285  1.00  0.00           H
ATOM   1765  CD  ARG A 314      53.898  39.164  45.468  1.00  0.00           C
ATOM   1766  HD1 ARG A 314      53.612  38.091  45.466  1.00  0.00           H
ATOM   1767  HD2 ARG A 314      53.030  39.795  45.179  1.00  0.00           H
ATOM   1768  NE  ARG A 314      55.013  39.321  44.504  1.00  0.00           N
ATOM   1769  HE  ARG A 314      55.973  39.446  44.757  1.00  0.00           H
ATOM   1770  CZ  ARG A 314      54.841  39.528  43.191  1.00  0.00           C
ATOM   1771  NH1 ARG A 314      53.728  39.317  42.603  1.00  0.00           N
ATOM   1772 1HH1 ARG A 314      53.002  38.900  43.149  1.00  0.00           H
ATOM   1773 2HH1 ARG A 314      53.713  39.687  41.673  1.00  0.00           H
ATOM   1774  NH2 ARG A 314      55.913  39.941  42.607  1.00  0.00           N
ATOM   1775 1HH2 ARG A 314      56.827  39.959  43.012  1.00  0.00           H
ATOM   1776 2HH2 ARG A 314      55.853  40.243  41.655  1.00  0.00           H
ATOM   1777  C   ARG A 314      51.759  38.640  49.678  1.00  0.00           C
ATOM   1778  O   ARG A 314      50.567  38.953  49.734  1.00  0.00           O
ATOM   1779  N   VAL A 315      52.539  38.386  50.761  1.00  0.00           N
ATOM   1780  HN  VAL A 315      53.501  38.158  50.639  1.00  0.00           H
ATOM   1781  CA  VAL A 315      52.179  38.688  52.167  1.00  0.00           C
ATOM   1782  HA  VAL A 315      51.180  39.094  52.116  1.00  0.00           H
ATOM   1783  CB  VAL A 315      52.146  37.365  53.058  1.00  0.00           C
ATOM   1784  HB  VAL A 315      51.968  37.598  54.130  1.00  0.00           H
ATOM   1785  CG1 VAL A 315      51.103  36.395  52.505  1.00  0.00           C
ATOM   1786 1HG1 VAL A 315      51.113  35.526  53.197  1.00  0.00           H
ATOM   1787 2HG1 VAL A 315      50.087  36.814  52.341  1.00  0.00           H
ATOM   1788 3HG1 VAL A 315      51.337  36.085  51.464  1.00  0.00           H
ATOM   1789  CG2 VAL A 315      53.500  36.640  52.982  1.00  0.00           C
ATOM   1790 1HG2 VAL A 315      53.406  35.778  53.676  1.00  0.00           H
ATOM   1791 2HG2 VAL A 315      53.754  36.281  51.962  1.00  0.00           H
ATOM   1792 3HG2 VAL A 315      54.232  37.371  53.386  1.00  0.00           H
ATOM   1793  C   VAL A 315      53.233  39.721  52.554  1.00  0.00           C
ATOM   1794  O   VAL A 315      54.313  39.853  51.982  1.00  0.00           O
ATOM   1795  N   TYR A 316      52.858  40.575  53.554  1.00  0.00           N
ATOM   1796  HN  TYR A 316      51.960  40.507  53.982  1.00  0.00           H
ATOM   1797  CA  TYR A 316      53.788  41.482  54.210  1.00  0.00           C
ATOM   1798  HA  TYR A 316      54.374  41.957  53.437  1.00  0.00           H
ATOM   1799  CB  TYR A 316      53.015  42.515  55.052  1.00  0.00           C
ATOM   1800  HB1 TYR A 316      52.296  42.030  55.746  1.00  0.00           H
ATOM   1801  HB2 TYR A 316      53.638  43.143  55.725  1.00  0.00           H
ATOM   1802  CG  TYR A 316      52.340  43.476  54.101  1.00  0.00           C
ATOM   1803  CD1 TYR A 316      53.105  44.346  53.320  1.00  0.00           C
ATOM   1804  HD1 TYR A 316      54.178  44.224  53.351  1.00  0.00           H
ATOM   1805  CE1 TYR A 316      52.521  45.292  52.433  1.00  0.00           C
ATOM   1806  HE1 TYR A 316      53.062  46.014  51.839  1.00  0.00           H
ATOM   1807  CZ  TYR A 316      51.110  45.288  52.403  1.00  0.00           C
ATOM   1808  OH  TYR A 316      50.455  46.315  51.680  1.00  0.00           O
ATOM   1809  HH  TYR A 316      49.585  46.514  52.034  1.00  0.00           H
ATOM   1810  CD2 TYR A 316      51.009  43.502  53.955  1.00  0.00           C
ATOM   1811  HD2 TYR A 316      50.443  42.822  54.574  1.00  0.00           H
ATOM   1812  CE2 TYR A 316      50.304  44.423  53.167  1.00  0.00           C
ATOM   1813  HE2 TYR A 316      49.236  44.526  53.292  1.00  0.00           H
ATOM   1814  C   TYR A 316      54.723  40.848  55.134  1.00  0.00           C
ATOM   1815  O   TYR A 316      54.278  40.265  56.153  1.00  0.00           O
ATOM   1816  N   VAL A 317      56.047  40.940  55.024  1.00  0.00           N
ATOM   1817  HN  VAL A 317      56.452  41.510  54.314  1.00  0.00           H
ATOM   1818  CA  VAL A 317      57.083  40.430  55.943  1.00  0.00           C
ATOM   1819  HA  VAL A 317      56.664  39.838  56.743  1.00  0.00           H
ATOM   1820  CB  VAL A 317      58.124  39.577  55.098  1.00  0.00           C
ATOM   1821  HB  VAL A 317      57.495  38.970  54.412  1.00  0.00           H
ATOM   1822  CG1 VAL A 317      59.190  40.379  54.284  1.00  0.00           C
ATOM   1823 1HG1 VAL A 317      59.724  39.662  53.625  1.00  0.00           H
ATOM   1824 2HG1 VAL A 317      58.637  41.125  53.674  1.00  0.00           H
ATOM   1825 3HG1 VAL A 317      59.931  40.815  54.988  1.00  0.00           H
ATOM   1826  CG2 VAL A 317      58.809  38.498  56.044  1.00  0.00           C
ATOM   1827 1HG2 VAL A 317      59.770  38.952  56.368  1.00  0.00           H
ATOM   1828 2HG2 VAL A 317      58.178  38.079  56.857  1.00  0.00           H
ATOM   1829 3HG2 VAL A 317      59.084  37.593  55.461  1.00  0.00           H
ATOM   1830  C   VAL A 317      57.763  41.671  56.537  1.00  0.00           C
ATOM   1831  O   VAL A 317      57.657  42.763  55.936  1.00  0.00           O
ATOM   1832  N   VAL A 318      58.356  41.594  57.718  1.00  0.00           N
ATOM   1833  HN  VAL A 318      58.334  40.753  58.254  1.00  0.00           H
ATOM   1834  CA  VAL A 318      59.206  42.643  58.195  1.00  0.00           C
ATOM   1835  HA  VAL A 318      58.598  43.524  58.049  1.00  0.00           H
ATOM   1836  CB  VAL A 318      59.394  42.702  59.749  1.00  0.00           C
ATOM   1837  HB  VAL A 318      58.414  42.531  60.244  1.00  0.00           H
ATOM   1838  CG1 VAL A 318      60.278  41.656  60.284  1.00  0.00           C
ATOM   1839 1HG1 VAL A 318      60.472  41.823  61.365  1.00  0.00           H
ATOM   1840 2HG1 VAL A 318      59.830  40.644  60.378  1.00  0.00           H
ATOM   1841 3HG1 VAL A 318      61.206  41.566  59.679  1.00  0.00           H
ATOM   1842  CG2 VAL A 318      59.889  44.110  60.225  1.00  0.00           C
ATOM   1843 1HG2 VAL A 318      59.069  44.824  59.994  1.00  0.00           H
ATOM   1844 2HG2 VAL A 318      59.869  44.169  61.335  1.00  0.00           H
ATOM   1845 3HG2 VAL A 318      60.916  44.357  59.883  1.00  0.00           H
ATOM   1846  C   VAL A 318      60.536  42.895  57.391  1.00  0.00           C
ATOM   1847  O   VAL A 318      61.254  41.978  56.920  1.00  0.00           O
ATOM   1848  N   ALA A 319      60.929  44.180  57.159  1.00  0.00           N
ATOM   1849  HN  ALA A 319      60.385  44.859  57.646  1.00  0.00           H
ATOM   1850  CA  ALA A 319      62.238  44.521  56.657  1.00  0.00           C
ATOM   1851  HA  ALA A 319      62.904  43.687  56.492  1.00  0.00           H
ATOM   1852  CB  ALA A 319      62.208  45.325  55.405  1.00  0.00           C
ATOM   1853  HB1 ALA A 319      61.591  46.231  55.588  1.00  0.00           H
ATOM   1854  HB2 ALA A 319      63.176  45.727  55.037  1.00  0.00           H
ATOM   1855  HB3 ALA A 319      61.892  44.705  54.539  1.00  0.00           H
ATOM   1856  C   ALA A 319      62.858  45.370  57.758  1.00  0.00           C
ATOM   1857  O   ALA A 319      62.219  46.334  58.243  1.00  0.00           O
ATOM   1858  N   GLU A 320      64.076  45.077  58.209  1.00  0.00           N
ATOM   1859  HN  GLU A 320      64.617  44.361  57.775  1.00  0.00           H
ATOM   1860  CA  GLU A 320      64.828  45.828  59.077  1.00  0.00           C
ATOM   1861  HA  GLU A 320      64.342  46.710  59.465  1.00  0.00           H
ATOM   1862  CB  GLU A 320      65.474  45.034  60.225  1.00  0.00           C
ATOM   1863  HB1 GLU A 320      66.216  44.324  59.801  1.00  0.00           H
ATOM   1864  HB2 GLU A 320      66.064  45.778  60.803  1.00  0.00           H
ATOM   1865  CG  GLU A 320      64.507  44.327  61.192  1.00  0.00           C
ATOM   1866  HG1 GLU A 320      63.790  44.975  61.739  1.00  0.00           H
ATOM   1867  HG2 GLU A 320      63.925  43.599  60.587  1.00  0.00           H
ATOM   1868  CD  GLU A 320      65.156  43.538  62.260  1.00  0.00           C
ATOM   1869  OE1 GLU A 320      65.337  42.263  62.156  1.00  0.00           O
ATOM   1870  OE2 GLU A 320      65.279  44.143  63.346  1.00  0.00           O
ATOM   1871  C   GLU A 320      65.972  46.260  58.256  1.00  0.00           C
ATOM   1872  O   GLU A 320      66.252  45.589  57.243  1.00  0.00           O
ATOM   1873  N   ARG A 321      66.602  47.388  58.698  1.00  0.00           N
ATOM   1874  HN  ARG A 321      66.221  47.903  59.462  1.00  0.00           H
ATOM   1875  CA  ARG A 321      67.655  47.992  57.960  1.00  0.00           C
ATOM   1876  HA  ARG A 321      68.313  47.232  57.564  1.00  0.00           H
ATOM   1877  CB  ARG A 321      67.064  48.900  56.837  1.00  0.00           C
ATOM   1878  HB1 ARG A 321      67.897  49.472  56.375  1.00  0.00           H
ATOM   1879  HB2 ARG A 321      66.471  48.223  56.185  1.00  0.00           H
ATOM   1880  CG  ARG A 321      66.065  49.938  57.379  1.00  0.00           C
ATOM   1881  HG1 ARG A 321      65.168  49.563  57.916  1.00  0.00           H
ATOM   1882  HG2 ARG A 321      66.605  50.487  58.181  1.00  0.00           H
ATOM   1883  CD  ARG A 321      65.642  50.967  56.336  1.00  0.00           C
ATOM   1884  HD1 ARG A 321      66.464  51.500  55.813  1.00  0.00           H
ATOM   1885  HD2 ARG A 321      65.118  50.421  55.522  1.00  0.00           H
ATOM   1886  NE  ARG A 321      64.561  51.777  56.963  1.00  0.00           N
ATOM   1887  HE  ARG A 321      64.283  51.653  57.915  1.00  0.00           H
ATOM   1888  CZ  ARG A 321      63.953  52.794  56.376  1.00  0.00           C
ATOM   1889  NH1 ARG A 321      64.279  53.436  55.264  1.00  0.00           N
ATOM   1890 1HH1 ARG A 321      65.213  53.392  54.909  1.00  0.00           H
ATOM   1891 2HH1 ARG A 321      63.632  54.051  54.813  1.00  0.00           H
ATOM   1892  NH2 ARG A 321      62.959  53.218  57.049  1.00  0.00           N
ATOM   1893 1HH2 ARG A 321      62.486  52.756  57.799  1.00  0.00           H
ATOM   1894 2HH2 ARG A 321      62.328  53.876  56.637  1.00  0.00           H
ATOM   1895  C   ARG A 321      68.588  48.828  58.886  1.00  0.00           C
ATOM   1896  O   ARG A 321      68.577  48.531  60.036  1.00  0.00           O
ATOM   1897  N   ASP A 322      69.321  49.787  58.403  1.00  0.00           N
ATOM   1898  HN  ASP A 322      69.511  49.857  57.427  1.00  0.00           H
ATOM   1899  CA  ASP A 322      70.069  50.683  59.218  1.00  0.00           C
ATOM   1900  HA  ASP A 322      70.510  50.080  59.999  1.00  0.00           H
ATOM   1901  CB  ASP A 322      71.117  51.384  58.412  1.00  0.00           C
ATOM   1902  HB1 ASP A 322      70.622  52.097  57.719  1.00  0.00           H
ATOM   1903  HB2 ASP A 322      71.783  51.976  59.076  1.00  0.00           H
ATOM   1904  CG  ASP A 322      71.902  50.464  57.518  1.00  0.00           C
ATOM   1905  OD1 ASP A 322      72.721  49.632  57.999  1.00  0.00           O
ATOM   1906  OD2 ASP A 322      71.567  50.450  56.353  1.00  0.00           O
ATOM   1907  C   ASP A 322      69.159  51.728  59.827  1.00  0.00           C
ATOM   1908  O   ASP A 322      69.270  52.088  60.983  1.00  0.00           O
ATOM   1909  N   GLY A 323      68.108  52.016  59.071  1.00  0.00           N
ATOM   1910  HN  GLY A 323      68.237  51.794  58.107  1.00  0.00           H
ATOM   1911  CA  GLY A 323      67.011  52.902  59.480  1.00  0.00           C
ATOM   1912  HA1 GLY A 323      67.462  53.748  59.979  1.00  0.00           H
ATOM   1913  HA2 GLY A 323      66.448  53.168  58.598  1.00  0.00           H
ATOM   1914  C   GLY A 323      66.075  52.129  60.398  1.00  0.00           C
ATOM   1915  O   GLY A 323      66.234  50.951  60.757  1.00  0.00           O
ATOM   1916  N   ASP A 324      64.984  52.818  60.685  1.00  0.00           N
ATOM   1917  HN  ASP A 324      64.879  53.805  60.586  1.00  0.00           H
ATOM   1918  CA  ASP A 324      63.782  52.248  61.346  1.00  0.00           C
ATOM   1919  HA  ASP A 324      64.065  51.742  62.257  1.00  0.00           H
ATOM   1920  CB  ASP A 324      62.709  53.360  61.722  1.00  0.00           C
ATOM   1921  HB1 ASP A 324      62.231  53.844  60.844  1.00  0.00           H
ATOM   1922  HB2 ASP A 324      61.931  52.797  62.281  1.00  0.00           H
ATOM   1923  CG  ASP A 324      63.342  54.341  62.677  1.00  0.00           C
ATOM   1924  OD1 ASP A 324      62.751  55.454  62.879  1.00  0.00           O
ATOM   1925  OD2 ASP A 324      64.442  54.090  63.224  1.00  0.00           O
ATOM   1926  C   ASP A 324      63.077  51.246  60.464  1.00  0.00           C
ATOM   1927  O   ASP A 324      63.018  51.393  59.260  1.00  0.00           O
ATOM   1928  N   ARG A 325      62.478  50.201  61.075  1.00  0.00           N
ATOM   1929  HN  ARG A 325      62.293  50.224  62.054  1.00  0.00           H
ATOM   1930  CA  ARG A 325      61.907  49.082  60.378  1.00  0.00           C
ATOM   1931  HA  ARG A 325      62.730  48.723  59.778  1.00  0.00           H
ATOM   1932  CB  ARG A 325      61.409  48.120  61.452  1.00  0.00           C
ATOM   1933  HB1 ARG A 325      60.736  48.700  62.120  1.00  0.00           H
ATOM   1934  HB2 ARG A 325      60.843  47.231  61.100  1.00  0.00           H
ATOM   1935  CG  ARG A 325      62.660  47.585  62.220  1.00  0.00           C
ATOM   1936  HG1 ARG A 325      63.222  46.961  61.493  1.00  0.00           H
ATOM   1937  HG2 ARG A 325      63.410  48.379  62.425  1.00  0.00           H
ATOM   1938  CD  ARG A 325      62.419  46.645  63.454  1.00  0.00           C
ATOM   1939  HD1 ARG A 325      61.806  45.759  63.185  1.00  0.00           H
ATOM   1940  HD2 ARG A 325      63.338  46.180  63.872  1.00  0.00           H
ATOM   1941  NE  ARG A 325      61.784  47.391  64.569  1.00  0.00           N
ATOM   1942  HE  ARG A 325      61.371  48.285  64.394  1.00  0.00           H
ATOM   1943  CZ  ARG A 325      61.356  46.860  65.703  1.00  0.00           C
ATOM   1944  NH1 ARG A 325      61.777  45.687  66.234  1.00  0.00           N
ATOM   1945 1HH1 ARG A 325      62.491  45.149  65.785  1.00  0.00           H
ATOM   1946 2HH1 ARG A 325      61.634  45.443  67.193  1.00  0.00           H
ATOM   1947  NH2 ARG A 325      60.419  47.471  66.437  1.00  0.00           N
ATOM   1948 1HH2 ARG A 325      60.018  48.347  66.169  1.00  0.00           H
ATOM   1949 2HH2 ARG A 325      60.353  47.146  67.380  1.00  0.00           H
ATOM   1950  C   ARG A 325      60.761  49.397  59.442  1.00  0.00           C
ATOM   1951  O   ARG A 325      60.057  50.365  59.595  1.00  0.00           O
ATOM   1952  N   ARG A 326      60.452  48.523  58.423  1.00  0.00           N
ATOM   1953  HN  ARG A 326      60.982  47.684  58.324  1.00  0.00           H
ATOM   1954  CA  ARG A 326      59.348  48.674  57.495  1.00  0.00           C
ATOM   1955  HA  ARG A 326      58.637  49.428  57.798  1.00  0.00           H
ATOM   1956  CB  ARG A 326      59.872  49.209  56.098  1.00  0.00           C
ATOM   1957  HB1 ARG A 326      60.734  48.558  55.840  1.00  0.00           H
ATOM   1958  HB2 ARG A 326      59.076  48.991  55.354  1.00  0.00           H
ATOM   1959  CG  ARG A 326      60.293  50.655  56.091  1.00  0.00           C
ATOM   1960  HG1 ARG A 326      59.393  51.101  56.565  1.00  0.00           H
ATOM   1961  HG2 ARG A 326      61.061  50.754  56.888  1.00  0.00           H
ATOM   1962  CD  ARG A 326      60.738  51.266  54.737  1.00  0.00           C
ATOM   1963  HD1 ARG A 326      60.015  51.103  53.909  1.00  0.00           H
ATOM   1964  HD2 ARG A 326      61.046  52.331  54.667  1.00  0.00           H
ATOM   1965  NE  ARG A 326      61.951  50.484  54.358  1.00  0.00           N
ATOM   1966  HE  ARG A 326      62.418  49.931  55.047  1.00  0.00           H
ATOM   1967  CZ  ARG A 326      62.463  50.576  53.144  1.00  0.00           C
ATOM   1968  NH1 ARG A 326      62.119  51.529  52.277  1.00  0.00           N
ATOM   1969 1HH1 ARG A 326      61.389  52.148  52.566  1.00  0.00           H
ATOM   1970 2HH1 ARG A 326      62.532  51.663  51.375  1.00  0.00           H
ATOM   1971  NH2 ARG A 326      63.465  49.807  52.700  1.00  0.00           N
ATOM   1972 1HH2 ARG A 326      63.783  48.968  53.142  1.00  0.00           H
ATOM   1973 2HH2 ARG A 326      63.766  49.731  51.749  1.00  0.00           H
ATOM   1974  C   ARG A 326      58.664  47.371  57.330  1.00  0.00           C
ATOM   1975  O   ARG A 326      59.204  46.379  57.814  1.00  0.00           O
ATOM   1976  N   LEU A 327      57.430  47.256  56.774  1.00  0.00           N
ATOM   1977  HN  LEU A 327      56.858  48.069  56.699  1.00  0.00           H
ATOM   1978  CA  LEU A 327      56.913  46.041  56.287  1.00  0.00           C
ATOM   1979  HA  LEU A 327      57.525  45.226  56.644  1.00  0.00           H
ATOM   1980  CB  LEU A 327      55.400  45.966  56.652  1.00  0.00           C
ATOM   1981  HB1 LEU A 327      55.005  46.988  56.467  1.00  0.00           H
ATOM   1982  HB2 LEU A 327      54.884  45.274  55.953  1.00  0.00           H
ATOM   1983  CG  LEU A 327      55.122  45.659  58.111  1.00  0.00           C
ATOM   1984  HG  LEU A 327      55.813  46.200  58.792  1.00  0.00           H
ATOM   1985  CD1 LEU A 327      53.673  46.052  58.589  1.00  0.00           C
ATOM   1986 1HD1 LEU A 327      53.448  47.140  58.562  1.00  0.00           H
ATOM   1987 2HD1 LEU A 327      52.857  45.515  58.060  1.00  0.00           H
ATOM   1988 3HD1 LEU A 327      53.545  45.673  59.625  1.00  0.00           H
ATOM   1989  CD2 LEU A 327      55.094  44.168  58.370  1.00  0.00           C
ATOM   1990 1HD2 LEU A 327      54.877  43.763  59.381  1.00  0.00           H
ATOM   1991 2HD2 LEU A 327      54.437  43.678  57.620  1.00  0.00           H
ATOM   1992 3HD2 LEU A 327      56.068  43.741  58.049  1.00  0.00           H
ATOM   1993  C   LEU A 327      56.964  46.056  54.725  1.00  0.00           C
ATOM   1994  O   LEU A 327      56.657  47.035  54.044  1.00  0.00           O
ATOM   1995  N   LEU A 328      57.393  44.983  54.077  1.00  0.00           N
ATOM   1996  HN  LEU A 328      57.569  44.114  54.531  1.00  0.00           H
ATOM   1997  CA  LEU A 328      57.492  44.855  52.639  1.00  0.00           C
ATOM   1998  HA  LEU A 328      57.028  45.729  52.208  1.00  0.00           H
ATOM   1999  CB  LEU A 328      58.940  44.799  52.101  1.00  0.00           C
ATOM   2000  HB1 LEU A 328      59.554  44.063  52.662  1.00  0.00           H
ATOM   2001  HB2 LEU A 328      58.929  44.523  51.025  1.00  0.00           H
ATOM   2002  CG  LEU A 328      59.720  46.172  52.206  1.00  0.00           C
ATOM   2003  HG  LEU A 328      59.667  46.504  53.265  1.00  0.00           H
ATOM   2004  CD1 LEU A 328      61.176  46.098  51.761  1.00  0.00           C
ATOM   2005 1HD1 LEU A 328      61.213  45.701  50.724  1.00  0.00           H
ATOM   2006 2HD1 LEU A 328      61.686  47.084  51.810  1.00  0.00           H
ATOM   2007 3HD1 LEU A 328      61.729  45.439  52.464  1.00  0.00           H
ATOM   2008  CD2 LEU A 328      58.995  47.316  51.462  1.00  0.00           C
ATOM   2009 1HD2 LEU A 328      59.113  47.343  50.357  1.00  0.00           H
ATOM   2010 2HD2 LEU A 328      57.901  47.377  51.647  1.00  0.00           H
ATOM   2011 3HD2 LEU A 328      59.391  48.293  51.811  1.00  0.00           H
ATOM   2012  C   LEU A 328      56.712  43.603  52.192  1.00  0.00           C
ATOM   2013  O   LEU A 328      56.609  42.579  52.875  1.00  0.00           O
ATOM   2014  N   PRO A 329      56.144  43.630  50.959  1.00  0.00           N
ATOM   2015  CD  PRO A 329      55.729  44.823  50.205  1.00  0.00           C
ATOM   2016  HD1 PRO A 329      56.585  45.092  49.549  1.00  0.00           H
ATOM   2017  HD2 PRO A 329      55.455  45.587  50.963  1.00  0.00           H
ATOM   2018  CA  PRO A 329      55.716  42.428  50.225  1.00  0.00           C
ATOM   2019  HA  PRO A 329      55.020  41.918  50.875  1.00  0.00           H
ATOM   2020  CB  PRO A 329      55.007  43.030  48.950  1.00  0.00           C
ATOM   2021  HB1 PRO A 329      55.766  43.009  48.139  1.00  0.00           H
ATOM   2022  HB2 PRO A 329      54.195  42.354  48.605  1.00  0.00           H
ATOM   2023  CG  PRO A 329      54.579  44.422  49.304  1.00  0.00           C
ATOM   2024  HG1 PRO A 329      54.577  45.187  48.499  1.00  0.00           H
ATOM   2025  HG2 PRO A 329      53.685  44.407  49.963  1.00  0.00           H
ATOM   2026  C   PRO A 329      56.852  41.456  49.899  1.00  0.00           C
ATOM   2027  O   PRO A 329      57.931  41.821  49.464  1.00  0.00           O
ATOM   2028  N   ALA A 330      56.507  40.207  50.113  1.00  0.00           N
ATOM   2029  HN  ALA A 330      55.658  39.971  50.578  1.00  0.00           H
ATOM   2030  CA  ALA A 330      57.317  39.046  49.832  1.00  0.00           C
ATOM   2031  HA  ALA A 330      58.131  39.295  49.168  1.00  0.00           H
ATOM   2032  CB  ALA A 330      57.779  38.449  51.164  1.00  0.00           C
ATOM   2033  HB1 ALA A 330      58.539  37.678  50.916  1.00  0.00           H
ATOM   2034  HB2 ALA A 330      58.308  39.353  51.536  1.00  0.00           H
ATOM   2035  HB3 ALA A 330      56.979  38.048  51.823  1.00  0.00           H
ATOM   2036  C   ALA A 330      56.443  38.004  49.256  1.00  0.00           C
ATOM   2037  O   ALA A 330      55.336  37.854  49.779  1.00  0.00           O
ATOM   2038  N   ALA A 331      56.762  37.234  48.183  1.00  0.00           N
ATOM   2039  HN  ALA A 331      57.698  37.248  47.841  1.00  0.00           H
ATOM   2040  CA  ALA A 331      55.884  36.181  47.570  1.00  0.00           C
ATOM   2041  HA  ALA A 331      54.888  36.596  47.600  1.00  0.00           H
ATOM   2042  CB  ALA A 331      56.348  36.013  46.107  1.00  0.00           C
ATOM   2043  HB1 ALA A 331      55.707  35.289  45.560  1.00  0.00           H
ATOM   2044  HB2 ALA A 331      56.479  36.951  45.527  1.00  0.00           H
ATOM   2045  HB3 ALA A 331      57.321  35.480  46.168  1.00  0.00           H
ATOM   2046  C   ALA A 331      55.840  34.819  48.336  1.00  0.00           C
ATOM   2047  O   ALA A 331      56.694  34.323  49.027  1.00  0.00           O
ATOM   2048  N   VAL A 332      54.623  34.216  48.304  1.00  0.00           N
ATOM   2049  HN  VAL A 332      53.839  34.741  47.981  1.00  0.00           H
ATOM   2050  CA  VAL A 332      54.281  32.948  48.901  1.00  0.00           C
ATOM   2051  HA  VAL A 332      54.683  32.889  49.902  1.00  0.00           H
ATOM   2052  CB  VAL A 332      52.779  32.824  48.990  1.00  0.00           C
ATOM   2053  HB  VAL A 332      52.345  33.085  48.001  1.00  0.00           H
ATOM   2054  CG1 VAL A 332      52.288  31.326  49.334  1.00  0.00           C
ATOM   2055 1HG1 VAL A 332      51.232  31.243  48.998  1.00  0.00           H
ATOM   2056 2HG1 VAL A 332      52.776  30.493  48.786  1.00  0.00           H
ATOM   2057 3HG1 VAL A 332      52.360  31.100  50.420  1.00  0.00           H
ATOM   2058  CG2 VAL A 332      52.274  33.839  50.015  1.00  0.00           C
ATOM   2059 1HG2 VAL A 332      51.177  33.704  50.128  1.00  0.00           H
ATOM   2060 2HG2 VAL A 332      52.859  33.762  50.956  1.00  0.00           H
ATOM   2061 3HG2 VAL A 332      52.430  34.872  49.638  1.00  0.00           H
ATOM   2062  C   VAL A 332      54.963  31.842  48.097  1.00  0.00           C
ATOM   2063  O   VAL A 332      54.974  31.847  46.893  1.00  0.00           O
ATOM   2064  N   HIS A 333      55.476  30.827  48.819  1.00  0.00           N
ATOM   2065  HN  HIS A 333      55.282  30.652  49.781  1.00  0.00           H
ATOM   2066  CA  HIS A 333      56.135  29.707  48.120  1.00  0.00           C
ATOM   2067  HA  HIS A 333      56.454  29.944  47.116  1.00  0.00           H
ATOM   2068  CB  HIS A 333      57.380  29.183  48.861  1.00  0.00           C
ATOM   2069  HB1 HIS A 333      58.002  30.103  48.894  1.00  0.00           H
ATOM   2070  HB2 HIS A 333      57.238  28.771  49.883  1.00  0.00           H
ATOM   2071  ND1 HIS A 333      58.457  28.425  46.788  1.00  0.00           N
ATOM   2072  CG  HIS A 333      58.100  28.127  48.085  1.00  0.00           C
ATOM   2073  CE1 HIS A 333      59.214  27.431  46.368  1.00  0.00           C
ATOM   2074  HE1 HIS A 333      59.678  27.317  45.388  1.00  0.00           H
ATOM   2075  NE2 HIS A 333      59.327  26.511  47.377  1.00  0.00           N
ATOM   2076  HE2 HIS A 333      60.019  25.790  47.339  1.00  0.00           H
ATOM   2077  CD2 HIS A 333      58.588  26.966  48.428  1.00  0.00           C
ATOM   2078  HD2 HIS A 333      58.490  26.647  49.459  1.00  0.00           H
ATOM   2079  C   HIS A 333      55.152  28.532  48.080  1.00  0.00           C
ATOM   2080  O   HIS A 333      54.292  28.509  48.941  1.00  0.00           O
ATOM   2081  N   SER A 334      55.296  27.592  47.107  1.00  0.00           N
ATOM   2082  HN  SER A 334      55.968  27.762  46.390  1.00  0.00           H
ATOM   2083  CA  SER A 334      54.574  26.334  46.940  1.00  0.00           C
ATOM   2084  HA  SER A 334      53.633  26.593  46.478  1.00  0.00           H
ATOM   2085  CB  SER A 334      55.518  25.357  46.134  1.00  0.00           C
ATOM   2086  HB1 SER A 334      56.471  25.309  46.703  1.00  0.00           H
ATOM   2087  HB2 SER A 334      54.998  24.378  46.066  1.00  0.00           H
ATOM   2088  OG  SER A 334      55.616  25.770  44.818  1.00  0.00           O
ATOM   2089  HG1 SER A 334      56.160  25.113  44.377  1.00  0.00           H
ATOM   2090  C   SER A 334      54.182  25.491  48.184  1.00  0.00           C
ATOM   2091  O   SER A 334      54.849  25.453  49.208  1.00  0.00           O
ATOM   2092  N   VAL A 335      53.151  24.614  47.996  1.00  0.00           N
ATOM   2093  HN  VAL A 335      52.632  24.613  47.145  1.00  0.00           H
ATOM   2094  CA  VAL A 335      52.404  23.944  49.063  1.00  0.00           C
ATOM   2095  HA  VAL A 335      52.101  24.737  49.730  1.00  0.00           H
ATOM   2096  CB  VAL A 335      51.142  23.355  48.454  1.00  0.00           C
ATOM   2097  HB  VAL A 335      51.475  22.898  47.498  1.00  0.00           H
ATOM   2098  CG1 VAL A 335      50.480  22.188  49.279  1.00  0.00           C
ATOM   2099 1HG1 VAL A 335      49.773  21.574  48.682  1.00  0.00           H
ATOM   2100 2HG1 VAL A 335      51.200  21.474  49.734  1.00  0.00           H
ATOM   2101 3HG1 VAL A 335      49.874  22.625  50.102  1.00  0.00           H
ATOM   2102  CG2 VAL A 335      50.102  24.397  48.021  1.00  0.00           C
ATOM   2103 1HG2 VAL A 335      50.426  24.867  47.067  1.00  0.00           H
ATOM   2104 2HG2 VAL A 335      49.161  23.845  47.809  1.00  0.00           H
ATOM   2105 3HG2 VAL A 335      49.949  25.199  48.774  1.00  0.00           H
ATOM   2106  C   VAL A 335      53.228  22.903  49.812  1.00  0.00           C
ATOM   2107  O   VAL A 335      53.970  22.143  49.178  1.00  0.00           O
ATOM   2108  N   THR A 336      53.232  22.902  51.218  1.00  0.00           N
ATOM   2109  HN  THR A 336      52.781  23.657  51.689  1.00  0.00           H
ATOM   2110  CA  THR A 336      53.983  21.909  51.933  1.00  0.00           C
ATOM   2111  HA  THR A 336      54.277  21.150  51.223  1.00  0.00           H
ATOM   2112  CB  THR A 336      55.305  22.441  52.481  1.00  0.00           C
ATOM   2113  HB  THR A 336      55.808  23.051  51.701  1.00  0.00           H
ATOM   2114  OG1 THR A 336      56.138  21.352  52.830  1.00  0.00           O
ATOM   2115  HG1 THR A 336      56.404  21.154  51.929  1.00  0.00           H
ATOM   2116  CG2 THR A 336      55.155  23.381  53.738  1.00  0.00           C
ATOM   2117 1HG2 THR A 336      54.676  22.753  54.519  1.00  0.00           H
ATOM   2118 2HG2 THR A 336      56.165  23.672  54.099  1.00  0.00           H
ATOM   2119 3HG2 THR A 336      54.525  24.270  53.523  1.00  0.00           H
ATOM   2120  C   THR A 336      53.145  21.230  53.005  1.00  0.00           C
ATOM   2121  O   THR A 336      52.404  21.873  53.737  1.00  0.00           O
ATOM   2122  N   LEU A 337      53.229  19.899  53.118  1.00  0.00           N
ATOM   2123  HN  LEU A 337      53.986  19.397  52.706  1.00  0.00           H
ATOM   2124  CA  LEU A 337      52.313  19.212  54.051  1.00  0.00           C
ATOM   2125  HA  LEU A 337      51.356  19.521  53.657  1.00  0.00           H
ATOM   2126  CB  LEU A 337      52.408  17.720  53.874  1.00  0.00           C
ATOM   2127  HB1 LEU A 337      53.389  17.287  54.164  1.00  0.00           H
ATOM   2128  HB2 LEU A 337      51.641  17.237  54.516  1.00  0.00           H
ATOM   2129  CG  LEU A 337      51.993  17.183  52.452  1.00  0.00           C
ATOM   2130  HG  LEU A 337      52.697  17.754  51.810  1.00  0.00           H
ATOM   2131  CD1 LEU A 337      52.474  15.723  52.333  1.00  0.00           C
ATOM   2132 1HD1 LEU A 337      52.216  15.288  51.344  1.00  0.00           H
ATOM   2133 2HD1 LEU A 337      53.552  15.568  52.552  1.00  0.00           H
ATOM   2134 3HD1 LEU A 337      52.030  15.113  53.148  1.00  0.00           H
ATOM   2135  CD2 LEU A 337      50.522  17.492  52.110  1.00  0.00           C
ATOM   2136 1HD2 LEU A 337      50.381  17.559  51.010  1.00  0.00           H
ATOM   2137 2HD2 LEU A 337      49.858  16.664  52.439  1.00  0.00           H
ATOM   2138 3HD2 LEU A 337      50.080  18.432  52.505  1.00  0.00           H
ATOM   2139  C   LEU A 337      52.356  19.638  55.579  1.00  0.00           C
ATOM   2140  O   LEU A 337      53.379  20.059  56.077  1.00  0.00           O
ATOM   2141  N   SER A 338      51.177  19.520  56.249  1.00  0.00           N
ATOM   2142  HN  SER A 338      50.343  19.123  55.873  1.00  0.00           H
ATOM   2143  CA  SER A 338      50.922  19.994  57.626  1.00  0.00           C
ATOM   2144  HA  SER A 338      50.749  21.047  57.462  1.00  0.00           H
ATOM   2145  CB  SER A 338      49.454  19.639  58.187  1.00  0.00           C
ATOM   2146  HB1 SER A 338      49.361  18.534  58.118  1.00  0.00           H
ATOM   2147  HB2 SER A 338      49.422  19.855  59.276  1.00  0.00           H
ATOM   2148  OG  SER A 338      48.476  20.436  57.471  1.00  0.00           O
ATOM   2149  HG1 SER A 338      48.739  20.461  56.548  1.00  0.00           H
ATOM   2150  C   SER A 338      51.955  19.805  58.756  1.00  0.00           C
ATOM   2151  O   SER A 338      52.695  18.807  58.717  1.00  0.00           O
ATOM   2152  N   GLU A 339      52.015  20.711  59.764  1.00  0.00           N
ATOM   2153  HN  GLU A 339      51.328  21.421  59.897  1.00  0.00           H
ATOM   2154  CA  GLU A 339      53.112  20.685  60.696  1.00  0.00           C
ATOM   2155  HA  GLU A 339      53.741  19.816  60.567  1.00  0.00           H
ATOM   2156  CB  GLU A 339      54.066  21.894  60.553  1.00  0.00           C
ATOM   2157  HB1 GLU A 339      53.468  22.823  60.437  1.00  0.00           H
ATOM   2158  HB2 GLU A 339      54.566  22.245  61.481  1.00  0.00           H
ATOM   2159  CG  GLU A 339      55.163  21.597  59.468  1.00  0.00           C
ATOM   2160  HG1 GLU A 339      54.754  21.197  58.516  1.00  0.00           H
ATOM   2161  HG2 GLU A 339      55.604  22.592  59.248  1.00  0.00           H
ATOM   2162  CD  GLU A 339      56.252  20.774  60.054  1.00  0.00           C
ATOM   2163  OE1 GLU A 339      56.826  21.095  61.107  1.00  0.00           O
ATOM   2164  OE2 GLU A 339      56.651  19.725  59.429  1.00  0.00           O
ATOM   2165  C   GLU A 339      52.640  20.509  62.145  1.00  0.00           C
ATOM   2166  O   GLU A 339      51.643  21.097  62.528  1.00  0.00           O
ATOM   2167  N   GLU A 340      53.296  19.756  63.050  1.00  0.00           N
ATOM   2168  HN  GLU A 340      54.121  19.266  62.779  1.00  0.00           H
ATOM   2169  CA  GLU A 340      52.996  19.880  64.457  1.00  0.00           C
ATOM   2170  HA  GLU A 340      51.998  20.291  64.497  1.00  0.00           H
ATOM   2171  CB  GLU A 340      53.000  18.379  65.052  1.00  0.00           C
ATOM   2172  HB1 GLU A 340      53.885  17.776  64.757  1.00  0.00           H
ATOM   2173  HB2 GLU A 340      52.830  18.391  66.150  1.00  0.00           H
ATOM   2174  CG  GLU A 340      51.761  17.494  64.643  1.00  0.00           C
ATOM   2175  HG1 GLU A 340      50.872  17.846  65.210  1.00  0.00           H
ATOM   2176  HG2 GLU A 340      51.589  17.663  63.559  1.00  0.00           H
ATOM   2177  CD  GLU A 340      51.930  15.938  64.799  1.00  0.00           C
ATOM   2178  OE1 GLU A 340      52.855  15.365  64.188  1.00  0.00           O
ATOM   2179  OE2 GLU A 340      51.018  15.276  65.434  1.00  0.00           O
ATOM   2180  C   GLU A 340      53.954  20.735  65.197  1.00  0.00           C
ATOM   2181  O   GLU A 340      55.128  20.925  64.780  1.00  0.00           O
ATOM   2182  N   ALA A 341      53.471  21.209  66.367  1.00  0.00           N
ATOM   2183  HN  ALA A 341      52.548  20.917  66.607  1.00  0.00           H
ATOM   2184  CA  ALA A 341      54.073  22.232  67.276  1.00  0.00           C
ATOM   2185  HA  ALA A 341      55.139  22.062  67.301  1.00  0.00           H
ATOM   2186  CB  ALA A 341      53.771  23.578  66.696  1.00  0.00           C
ATOM   2187  HB1 ALA A 341      53.975  24.357  67.462  1.00  0.00           H
ATOM   2188  HB2 ALA A 341      54.451  23.874  65.870  1.00  0.00           H
ATOM   2189  HB3 ALA A 341      52.690  23.603  66.442  1.00  0.00           H
ATOM   2190  C   ALA A 341      53.521  22.103  68.640  1.00  0.00           C
ATOM   2191  O   ALA A 341      52.455  21.543  68.900  1.00  0.00           O
ATOM   2192  N   ALA A 342      54.159  22.588  69.698  1.00  0.00           N
ATOM   2193  HN  ALA A 342      55.046  23.014  69.540  1.00  0.00           H
ATOM   2194  CA  ALA A 342      53.732  22.607  71.060  1.00  0.00           C
ATOM   2195  HA  ALA A 342      53.092  21.768  71.290  1.00  0.00           H
ATOM   2196  CB  ALA A 342      54.905  22.533  72.050  1.00  0.00           C
ATOM   2197  HB1 ALA A 342      55.682  23.321  71.957  1.00  0.00           H
ATOM   2198  HB2 ALA A 342      54.694  22.414  73.135  1.00  0.00           H
ATOM   2199  HB3 ALA A 342      55.442  21.562  72.004  1.00  0.00           H
ATOM   2200  C   ALA A 342      52.897  23.800  71.280  1.00  0.00           C
ATOM   2201  O   ALA A 342      53.280  24.946  70.935  1.00  0.00           O
ATOM   2202  N   GLY A 343      51.744  23.605  71.954  1.00  0.00           N
ATOM   2203  HN  GLY A 343      51.424  22.705  72.242  1.00  0.00           H
ATOM   2204  CA  GLY A 343      50.892  24.700  72.348  1.00  0.00           C
ATOM   2205  HA1 GLY A 343      50.213  24.207  73.029  1.00  0.00           H
ATOM   2206  HA2 GLY A 343      51.418  25.519  72.814  1.00  0.00           H
ATOM   2207  C   GLY A 343      49.995  25.110  71.183  1.00  0.00           C
ATOM   2208  O   GLY A 343      50.246  24.890  69.979  1.00  0.00           O
ATOM   2209  N   ALA A 344      48.847  25.617  71.478  1.00  0.00           N
ATOM   2210  HN  ALA A 344      48.638  25.792  72.437  1.00  0.00           H
ATOM   2211  CA  ALA A 344      47.920  26.026  70.426  1.00  0.00           C
ATOM   2212  HA  ALA A 344      48.427  26.462  69.578  1.00  0.00           H
ATOM   2213  CB  ALA A 344      46.989  24.900  70.062  1.00  0.00           C
ATOM   2214  HB1 ALA A 344      46.479  24.334  70.871  1.00  0.00           H
ATOM   2215  HB2 ALA A 344      46.161  25.205  69.388  1.00  0.00           H
ATOM   2216  HB3 ALA A 344      47.567  24.237  69.384  1.00  0.00           H
ATOM   2217  C   ALA A 344      47.208  27.263  70.899  1.00  0.00           C
ATOM   2218  O   ALA A 344      46.341  27.147  71.752  1.00  0.00           O
ATOM   2219  N   TYR A 345      47.579  28.461  70.472  1.00  0.00           N
ATOM   2220  HN  TYR A 345      48.225  28.539  69.717  1.00  0.00           H
ATOM   2221  CA  TYR A 345      47.217  29.717  71.111  1.00  0.00           C
ATOM   2222  HA  TYR A 345      46.581  29.428  71.934  1.00  0.00           H
ATOM   2223  CB  TYR A 345      48.542  30.343  71.825  1.00  0.00           C
ATOM   2224  HB1 TYR A 345      49.435  30.223  71.175  1.00  0.00           H
ATOM   2225  HB2 TYR A 345      48.308  31.422  71.945  1.00  0.00           H
ATOM   2226  CG  TYR A 345      48.842  29.771  73.227  1.00  0.00           C
ATOM   2227  CD1 TYR A 345      48.402  30.499  74.362  1.00  0.00           C
ATOM   2228  HD1 TYR A 345      47.726  31.336  74.276  1.00  0.00           H
ATOM   2229  CE1 TYR A 345      48.723  30.113  75.620  1.00  0.00           C
ATOM   2230  HE1 TYR A 345      48.390  30.644  76.500  1.00  0.00           H
ATOM   2231  CZ  TYR A 345      49.538  28.983  75.891  1.00  0.00           C
ATOM   2232  OH  TYR A 345      49.831  28.555  77.261  1.00  0.00           O
ATOM   2233  HH  TYR A 345      49.735  29.302  77.856  1.00  0.00           H
ATOM   2234  CD2 TYR A 345      49.555  28.591  73.507  1.00  0.00           C
ATOM   2235  HD2 TYR A 345      49.788  28.014  72.624  1.00  0.00           H
ATOM   2236  CE2 TYR A 345      49.896  28.141  74.814  1.00  0.00           C
ATOM   2237  HE2 TYR A 345      50.433  27.232  75.039  1.00  0.00           H
ATOM   2238  C   TYR A 345      46.570  30.692  70.172  1.00  0.00           C
ATOM   2239  O   TYR A 345      47.000  30.929  69.051  1.00  0.00           O
ATOM   2240  N   ALA A 346      45.467  31.263  70.612  1.00  0.00           N
ATOM   2241  HN  ALA A 346      44.919  30.753  71.272  1.00  0.00           H
ATOM   2242  CA  ALA A 346      44.880  32.346  69.900  1.00  0.00           C
ATOM   2243  HA  ALA A 346      45.199  32.365  68.869  1.00  0.00           H
ATOM   2244  CB  ALA A 346      43.400  31.941  69.626  1.00  0.00           C
ATOM   2245  HB1 ALA A 346      42.755  31.870  70.528  1.00  0.00           H
ATOM   2246  HB2 ALA A 346      42.962  32.611  68.855  1.00  0.00           H
ATOM   2247  HB3 ALA A 346      43.227  30.929  69.202  1.00  0.00           H
ATOM   2248  C   ALA A 346      45.047  33.745  70.400  1.00  0.00           C
ATOM   2249  O   ALA A 346      44.107  34.044  71.184  1.00  0.00           O
ATOM   2250  N   PRO A 347      46.026  34.610  70.133  1.00  0.00           N
ATOM   2251  CD  PRO A 347      47.207  34.227  69.329  1.00  0.00           C
ATOM   2252  HD1 PRO A 347      46.867  34.103  68.279  1.00  0.00           H
ATOM   2253  HD2 PRO A 347      47.631  33.296  69.762  1.00  0.00           H
ATOM   2254  CA  PRO A 347      46.296  35.814  70.940  1.00  0.00           C
ATOM   2255  HA  PRO A 347      45.864  35.633  71.913  1.00  0.00           H
ATOM   2256  CB  PRO A 347      47.835  36.003  70.781  1.00  0.00           C
ATOM   2257  HB1 PRO A 347      48.080  37.083  70.867  1.00  0.00           H
ATOM   2258  HB2 PRO A 347      48.392  35.501  71.601  1.00  0.00           H
ATOM   2259  CG  PRO A 347      48.133  35.409  69.397  1.00  0.00           C
ATOM   2260  HG1 PRO A 347      47.819  36.188  68.670  1.00  0.00           H
ATOM   2261  HG2 PRO A 347      49.184  35.110  69.196  1.00  0.00           H
ATOM   2262  C   PRO A 347      45.527  36.997  70.436  1.00  0.00           C
ATOM   2263  O   PRO A 347      45.258  36.975  69.210  1.00  0.00           O
ATOM   2264  N   LEU A 348      45.086  38.022  71.251  1.00  0.00           N
ATOM   2265  HN  LEU A 348      45.031  37.883  72.236  1.00  0.00           H
ATOM   2266  CA  LEU A 348      44.247  39.061  70.719  1.00  0.00           C
ATOM   2267  HA  LEU A 348      44.075  39.033  69.653  1.00  0.00           H
ATOM   2268  CB  LEU A 348      42.792  38.817  71.244  1.00  0.00           C
ATOM   2269  HB1 LEU A 348      42.571  37.842  70.758  1.00  0.00           H
ATOM   2270  HB2 LEU A 348      42.860  38.575  72.326  1.00  0.00           H
ATOM   2271  CG  LEU A 348      41.758  39.947  70.999  1.00  0.00           C
ATOM   2272  HG  LEU A 348      42.202  40.961  71.084  1.00  0.00           H
ATOM   2273  CD1 LEU A 348      41.144  39.841  69.593  1.00  0.00           C
ATOM   2274 1HD1 LEU A 348      41.780  39.946  68.688  1.00  0.00           H
ATOM   2275 2HD1 LEU A 348      40.679  38.833  69.538  1.00  0.00           H
ATOM   2276 3HD1 LEU A 348      40.324  40.590  69.589  1.00  0.00           H
ATOM   2277  CD2 LEU A 348      40.671  39.886  72.064  1.00  0.00           C
ATOM   2278 1HD2 LEU A 348      40.111  38.929  71.993  1.00  0.00           H
ATOM   2279 2HD2 LEU A 348      41.058  39.967  73.102  1.00  0.00           H
ATOM   2280 3HD2 LEU A 348      40.024  40.771  71.884  1.00  0.00           H
ATOM   2281  C   LEU A 348      44.823  40.431  71.044  1.00  0.00           C
ATOM   2282  O   LEU A 348      45.351  40.656  72.135  1.00  0.00           O
ATOM   2283  N   THR A 349      44.825  41.319  70.042  1.00  0.00           N
ATOM   2284  HN  THR A 349      44.431  41.226  69.131  1.00  0.00           H
ATOM   2285  CA  THR A 349      45.312  42.677  70.256  1.00  0.00           C
ATOM   2286  HA  THR A 349      45.723  42.694  71.255  1.00  0.00           H
ATOM   2287  CB  THR A 349      46.429  43.012  69.231  1.00  0.00           C
ATOM   2288  HB  THR A 349      46.763  44.045  69.471  1.00  0.00           H
ATOM   2289  OG1 THR A 349      45.944  42.907  67.879  1.00  0.00           O
ATOM   2290  HG1 THR A 349      46.688  42.578  67.370  1.00  0.00           H
ATOM   2291  CG2 THR A 349      47.647  42.106  69.526  1.00  0.00           C
ATOM   2292 1HG2 THR A 349      48.483  42.158  68.797  1.00  0.00           H
ATOM   2293 2HG2 THR A 349      48.031  42.304  70.550  1.00  0.00           H
ATOM   2294 3HG2 THR A 349      47.274  41.067  69.654  1.00  0.00           H
ATOM   2295  C   THR A 349      44.185  43.641  70.159  1.00  0.00           C
ATOM   2296  O   THR A 349      43.109  43.392  69.643  1.00  0.00           O
ATOM   2297  N   ALA A 350      44.417  44.872  70.629  1.00  0.00           N
ATOM   2298  HN  ALA A 350      45.331  45.195  70.864  1.00  0.00           H
ATOM   2299  CA  ALA A 350      43.395  45.912  70.578  1.00  0.00           C
ATOM   2300  HA  ALA A 350      42.559  45.388  71.017  1.00  0.00           H
ATOM   2301  CB  ALA A 350      43.841  47.036  71.543  1.00  0.00           C
ATOM   2302  HB1 ALA A 350      44.722  47.556  71.111  1.00  0.00           H
ATOM   2303  HB2 ALA A 350      43.030  47.781  71.692  1.00  0.00           H
ATOM   2304  HB3 ALA A 350      44.164  46.604  72.515  1.00  0.00           H
ATOM   2305  C   ALA A 350      43.052  46.325  69.150  1.00  0.00           C
ATOM   2306  O   ALA A 350      41.867  46.639  68.831  1.00  0.00           O
ATOM   2307  N   GLN A 351      44.053  46.213  68.214  1.00  0.00           N
ATOM   2308  HN  GLN A 351      44.924  45.873  68.560  1.00  0.00           H
ATOM   2309  CA  GLN A 351      43.893  46.619  66.800  1.00  0.00           C
ATOM   2310  HA  GLN A 351      43.103  47.355  66.761  1.00  0.00           H
ATOM   2311  CB  GLN A 351      45.079  47.277  66.135  1.00  0.00           C
ATOM   2312  HB1 GLN A 351      46.015  46.731  66.382  1.00  0.00           H
ATOM   2313  HB2 GLN A 351      45.001  47.312  65.028  1.00  0.00           H
ATOM   2314  CG  GLN A 351      45.499  48.717  66.403  1.00  0.00           C
ATOM   2315  HG1 GLN A 351      46.210  48.770  67.256  1.00  0.00           H
ATOM   2316  HG2 GLN A 351      46.101  49.084  65.544  1.00  0.00           H
ATOM   2317  CD  GLN A 351      44.349  49.644  66.741  1.00  0.00           C
ATOM   2318  OE1 GLN A 351      43.903  49.989  67.825  1.00  0.00           O
ATOM   2319  NE2 GLN A 351      43.656  50.010  65.646  1.00  0.00           N
ATOM   2320 1HE2 GLN A 351      42.858  50.590  65.806  1.00  0.00           H
ATOM   2321 2HE2 GLN A 351      44.007  49.737  64.750  1.00  0.00           H
ATOM   2322  C   GLN A 351      43.406  45.456  65.841  1.00  0.00           C
ATOM   2323  O   GLN A 351      42.895  45.766  64.764  1.00  0.00           O
ATOM   2324  N   GLY A 352      43.468  44.218  66.239  1.00  0.00           N
ATOM   2325  HN  GLY A 352      43.898  44.054  67.124  1.00  0.00           H
ATOM   2326  CA  GLY A 352      43.052  43.075  65.466  1.00  0.00           C
ATOM   2327  HA1 GLY A 352      42.838  42.241  66.118  1.00  0.00           H
ATOM   2328  HA2 GLY A 352      42.251  43.335  64.790  1.00  0.00           H
ATOM   2329  C   GLY A 352      44.156  42.480  64.633  1.00  0.00           C
ATOM   2330  O   GLY A 352      43.826  41.802  63.663  1.00  0.00           O
ATOM   2331  N   THR A 353      45.473  42.654  64.939  1.00  0.00           N
ATOM   2332  HN  THR A 353      45.833  42.983  65.809  1.00  0.00           H
ATOM   2333  CA  THR A 353      46.453  42.302  63.914  1.00  0.00           C
ATOM   2334  HA  THR A 353      46.202  41.292  63.622  1.00  0.00           H
ATOM   2335  CB  THR A 353      46.567  43.219  62.748  1.00  0.00           C
ATOM   2336  HB  THR A 353      45.631  43.132  62.155  1.00  0.00           H
ATOM   2337  OG1 THR A 353      47.681  42.881  61.899  1.00  0.00           O
ATOM   2338  HG1 THR A 353      47.351  42.377  61.151  1.00  0.00           H
ATOM   2339  CG2 THR A 353      46.687  44.655  63.171  1.00  0.00           C
ATOM   2340 1HG2 THR A 353      46.723  45.229  62.220  1.00  0.00           H
ATOM   2341 2HG2 THR A 353      45.770  44.908  63.747  1.00  0.00           H
ATOM   2342 3HG2 THR A 353      47.665  44.985  63.581  1.00  0.00           H
ATOM   2343  C   THR A 353      47.828  42.206  64.728  1.00  0.00           C
ATOM   2344  O   THR A 353      47.897  42.709  65.837  1.00  0.00           O
ATOM   2345  N   ILE A 354      48.771  41.350  64.205  1.00  0.00           N
ATOM   2346  HN  ILE A 354      48.845  41.078  63.249  1.00  0.00           H
ATOM   2347  CA  ILE A 354      49.942  41.022  65.015  1.00  0.00           C
ATOM   2348  HA  ILE A 354      50.331  42.000  65.258  1.00  0.00           H
ATOM   2349  CB  ILE A 354      49.681  40.119  66.230  1.00  0.00           C
ATOM   2350  HB  ILE A 354      48.938  40.599  66.902  1.00  0.00           H
ATOM   2351  CG2 ILE A 354      49.085  38.719  65.747  1.00  0.00           C
ATOM   2352 1HG2 ILE A 354      48.214  38.787  65.061  1.00  0.00           H
ATOM   2353 2HG2 ILE A 354      49.877  38.192  65.172  1.00  0.00           H
ATOM   2354 3HG2 ILE A 354      48.825  38.050  66.594  1.00  0.00           H
ATOM   2355  CG1 ILE A 354      50.936  39.878  67.070  1.00  0.00           C
ATOM   2356 1HG1 ILE A 354      51.668  39.204  66.576  1.00  0.00           H
ATOM   2357 2HG1 ILE A 354      51.487  40.813  67.309  1.00  0.00           H
ATOM   2358  CD  ILE A 354      50.570  39.196  68.374  1.00  0.00           C
ATOM   2359  HD1 ILE A 354      49.753  39.662  68.966  1.00  0.00           H
ATOM   2360  HD2 ILE A 354      50.235  38.140  68.289  1.00  0.00           H
ATOM   2361  HD3 ILE A 354      51.471  39.088  69.014  1.00  0.00           H
ATOM   2362  C   ILE A 354      51.022  40.541  64.025  1.00  0.00           C
ATOM   2363  O   ILE A 354      50.779  40.029  62.988  1.00  0.00           O
ATOM   2364  N   LEU A 355      52.270  40.605  64.441  1.00  0.00           N
ATOM   2365  HN  LEU A 355      52.537  41.114  65.256  1.00  0.00           H
ATOM   2366  CA  LEU A 355      53.456  40.187  63.733  1.00  0.00           C
ATOM   2367  HA  LEU A 355      53.127  39.978  62.726  1.00  0.00           H
ATOM   2368  CB  LEU A 355      54.449  41.363  63.622  1.00  0.00           C
ATOM   2369  HB1 LEU A 355      53.963  42.256  63.174  1.00  0.00           H
ATOM   2370  HB2 LEU A 355      54.770  41.751  64.612  1.00  0.00           H
ATOM   2371  CG  LEU A 355      55.718  41.107  62.741  1.00  0.00           C
ATOM   2372  HG  LEU A 355      56.026  40.045  62.851  1.00  0.00           H
ATOM   2373  CD1 LEU A 355      55.426  41.285  61.311  1.00  0.00           C
ATOM   2374 1HD1 LEU A 355      55.448  42.351  60.998  1.00  0.00           H
ATOM   2375 2HD1 LEU A 355      56.192  40.711  60.748  1.00  0.00           H
ATOM   2376 3HD1 LEU A 355      54.467  40.842  60.967  1.00  0.00           H
ATOM   2377  CD2 LEU A 355      56.980  41.827  63.122  1.00  0.00           C
ATOM   2378 1HD2 LEU A 355      56.849  42.925  63.019  1.00  0.00           H
ATOM   2379 2HD2 LEU A 355      57.229  41.602  64.182  1.00  0.00           H
ATOM   2380 3HD2 LEU A 355      57.831  41.612  62.442  1.00  0.00           H
ATOM   2381  C   LEU A 355      54.142  38.934  64.281  1.00  0.00           C
ATOM   2382  O   LEU A 355      54.731  39.025  65.353  1.00  0.00           O
ATOM   2383  N   ILE A 356      54.186  37.805  63.503  1.00  0.00           N
ATOM   2384  HN  ILE A 356      53.981  37.948  62.538  1.00  0.00           H
ATOM   2385  CA  ILE A 356      54.402  36.432  64.003  1.00  0.00           C
ATOM   2386  HA  ILE A 356      54.790  36.433  65.011  1.00  0.00           H
ATOM   2387  CB  ILE A 356      53.037  35.673  63.877  1.00  0.00           C
ATOM   2388  HB  ILE A 356      52.757  35.840  62.815  1.00  0.00           H
ATOM   2389  CG2 ILE A 356      53.219  34.116  64.219  1.00  0.00           C
ATOM   2390 1HG2 ILE A 356      53.585  33.599  63.306  1.00  0.00           H
ATOM   2391 2HG2 ILE A 356      53.991  34.023  65.012  1.00  0.00           H
ATOM   2392 3HG2 ILE A 356      52.280  33.643  64.579  1.00  0.00           H
ATOM   2393  CG1 ILE A 356      51.792  36.116  64.682  1.00  0.00           C
ATOM   2394 1HG1 ILE A 356      51.592  37.196  64.514  1.00  0.00           H
ATOM   2395 2HG1 ILE A 356      50.841  35.708  64.279  1.00  0.00           H
ATOM   2396  CD  ILE A 356      52.026  36.079  66.236  1.00  0.00           C
ATOM   2397  HD1 ILE A 356      52.891  36.709  66.536  1.00  0.00           H
ATOM   2398  HD2 ILE A 356      51.144  36.556  66.715  1.00  0.00           H
ATOM   2399  HD3 ILE A 356      52.093  35.061  66.677  1.00  0.00           H
ATOM   2400  C   ILE A 356      55.416  35.755  63.098  1.00  0.00           C
ATOM   2401  O   ILE A 356      55.124  35.413  61.969  1.00  0.00           O
ATOM   2402  N   ASN A 357      56.672  35.506  63.552  1.00  0.00           N
ATOM   2403  HN  ASN A 357      56.883  35.909  64.439  1.00  0.00           H
ATOM   2404  CA  ASN A 357      57.748  34.828  62.784  1.00  0.00           C
ATOM   2405  HA  ASN A 357      58.592  34.732  63.452  1.00  0.00           H
ATOM   2406  CB  ASN A 357      57.448  33.398  62.268  1.00  0.00           C
ATOM   2407  HB1 ASN A 357      56.559  33.459  61.603  1.00  0.00           H
ATOM   2408  HB2 ASN A 357      58.286  33.045  61.630  1.00  0.00           H
ATOM   2409  CG  ASN A 357      57.182  32.531  63.442  1.00  0.00           C
ATOM   2410  OD1 ASN A 357      56.048  32.132  63.786  1.00  0.00           O
ATOM   2411  ND2 ASN A 357      58.240  32.056  64.073  1.00  0.00           N
ATOM   2412 1HD2 ASN A 357      59.113  32.239  63.621  1.00  0.00           H
ATOM   2413 2HD2 ASN A 357      58.106  31.346  64.765  1.00  0.00           H
ATOM   2414  C   ASN A 357      58.193  35.751  61.638  1.00  0.00           C
ATOM   2415  O   ASN A 357      58.729  35.282  60.606  1.00  0.00           O
ATOM   2416  N   ARG A 358      58.040  37.107  61.841  1.00  0.00           N
ATOM   2417  HN  ARG A 358      57.594  37.431  62.671  1.00  0.00           H
ATOM   2418  CA  ARG A 358      58.512  38.165  60.915  1.00  0.00           C
ATOM   2419  HA  ARG A 358      58.623  39.036  61.545  1.00  0.00           H
ATOM   2420  CB  ARG A 358      59.902  38.035  60.217  1.00  0.00           C
ATOM   2421  HB1 ARG A 358      60.007  37.164  59.536  1.00  0.00           H
ATOM   2422  HB2 ARG A 358      60.015  38.906  59.537  1.00  0.00           H
ATOM   2423  CG  ARG A 358      60.977  38.039  61.306  1.00  0.00           C
ATOM   2424  HG1 ARG A 358      60.914  38.952  61.935  1.00  0.00           H
ATOM   2425  HG2 ARG A 358      60.723  37.197  61.985  1.00  0.00           H
ATOM   2426  CD  ARG A 358      62.369  37.740  60.781  1.00  0.00           C
ATOM   2427  HD1 ARG A 358      63.112  37.486  61.566  1.00  0.00           H
ATOM   2428  HD2 ARG A 358      62.369  36.757  60.263  1.00  0.00           H
ATOM   2429  NE  ARG A 358      62.792  38.895  59.926  1.00  0.00           N
ATOM   2430  HE  ARG A 358      62.544  39.003  58.964  1.00  0.00           H
ATOM   2431  CZ  ARG A 358      63.455  39.895  60.408  1.00  0.00           C
ATOM   2432  NH1 ARG A 358      63.865  40.071  61.624  1.00  0.00           N
ATOM   2433 1HH1 ARG A 358      64.304  40.937  61.861  1.00  0.00           H
ATOM   2434 2HH1 ARG A 358      63.695  39.288  62.222  1.00  0.00           H
ATOM   2435  NH2 ARG A 358      63.802  40.928  59.598  1.00  0.00           N
ATOM   2436 1HH2 ARG A 358      63.676  40.861  58.608  1.00  0.00           H
ATOM   2437 2HH2 ARG A 358      64.518  41.474  60.032  1.00  0.00           H
ATOM   2438  C   ARG A 358      57.503  38.413  59.824  1.00  0.00           C
ATOM   2439  O   ARG A 358      57.658  39.486  59.258  1.00  0.00           O
ATOM   2440  N   VAL A 359      56.431  37.541  59.686  1.00  0.00           N
ATOM   2441  HN  VAL A 359      56.500  36.702  60.220  1.00  0.00           H
ATOM   2442  CA  VAL A 359      55.396  37.663  58.673  1.00  0.00           C
ATOM   2443  HA  VAL A 359      55.741  38.390  57.952  1.00  0.00           H
ATOM   2444  CB  VAL A 359      54.968  36.404  57.910  1.00  0.00           C
ATOM   2445  HB  VAL A 359      54.406  35.713  58.573  1.00  0.00           H
ATOM   2446  CG1 VAL A 359      53.958  36.780  56.757  1.00  0.00           C
ATOM   2447 1HG1 VAL A 359      54.329  37.626  56.139  1.00  0.00           H
ATOM   2448 2HG1 VAL A 359      53.908  35.944  56.027  1.00  0.00           H
ATOM   2449 3HG1 VAL A 359      52.970  37.026  57.201  1.00  0.00           H
ATOM   2450  CG2 VAL A 359      56.235  35.711  57.533  1.00  0.00           C
ATOM   2451 1HG2 VAL A 359      56.094  35.091  56.621  1.00  0.00           H
ATOM   2452 2HG2 VAL A 359      57.034  36.475  57.429  1.00  0.00           H
ATOM   2453 3HG2 VAL A 359      56.620  35.086  58.366  1.00  0.00           H
ATOM   2454  C   VAL A 359      54.192  38.326  59.379  1.00  0.00           C
ATOM   2455  O   VAL A 359      53.948  38.184  60.613  1.00  0.00           O
ATOM   2456  N   LEU A 360      53.414  39.094  58.638  1.00  0.00           N
ATOM   2457  HN  LEU A 360      53.534  39.156  57.650  1.00  0.00           H
ATOM   2458  CA  LEU A 360      52.297  39.770  59.286  1.00  0.00           C
ATOM   2459  HA  LEU A 360      52.468  40.063  60.311  1.00  0.00           H
ATOM   2460  CB  LEU A 360      51.952  41.022  58.455  1.00  0.00           C
ATOM   2461  HB1 LEU A 360      52.876  41.632  58.371  1.00  0.00           H
ATOM   2462  HB2 LEU A 360      51.584  40.818  57.427  1.00  0.00           H
ATOM   2463  CG  LEU A 360      50.945  41.982  59.145  1.00  0.00           C
ATOM   2464  HG  LEU A 360      50.149  41.368  59.619  1.00  0.00           H
ATOM   2465  CD1 LEU A 360      51.462  42.786  60.341  1.00  0.00           C
ATOM   2466 1HD1 LEU A 360      51.961  42.111  61.070  1.00  0.00           H
ATOM   2467 2HD1 LEU A 360      52.136  43.611  60.026  1.00  0.00           H
ATOM   2468 3HD1 LEU A 360      50.628  43.373  60.781  1.00  0.00           H
ATOM   2469  CD2 LEU A 360      50.356  42.925  58.113  1.00  0.00           C
ATOM   2470 1HD2 LEU A 360      49.603  43.590  58.588  1.00  0.00           H
ATOM   2471 2HD2 LEU A 360      51.147  43.505  57.591  1.00  0.00           H
ATOM   2472 3HD2 LEU A 360      49.843  42.312  57.342  1.00  0.00           H
ATOM   2473  C   LEU A 360      51.022  38.867  59.227  1.00  0.00           C
ATOM   2474  O   LEU A 360      50.763  38.362  58.153  1.00  0.00           O
ATOM   2475  N   ALA A 361      50.317  38.643  60.297  1.00  0.00           N
ATOM   2476  HN  ALA A 361      50.561  38.915  61.225  1.00  0.00           H
ATOM   2477  CA  ALA A 361      49.085  37.844  60.234  1.00  0.00           C
ATOM   2478  HA  ALA A 361      48.809  37.592  59.221  1.00  0.00           H
ATOM   2479  CB  ALA A 361      49.163  36.475  61.072  1.00  0.00           C
ATOM   2480  HB1 ALA A 361      49.971  35.871  60.607  1.00  0.00           H
ATOM   2481  HB2 ALA A 361      49.557  36.813  62.054  1.00  0.00           H
ATOM   2482  HB3 ALA A 361      48.200  35.926  61.149  1.00  0.00           H
ATOM   2483  C   ALA A 361      47.920  38.626  60.793  1.00  0.00           C
ATOM   2484  O   ALA A 361      48.014  39.796  61.137  1.00  0.00           O
ATOM   2485  N   SER A 362      46.740  37.992  60.899  1.00  0.00           N
ATOM   2486  HN  SER A 362      46.792  37.020  60.682  1.00  0.00           H
ATOM   2487  CA  SER A 362      45.601  38.610  61.620  1.00  0.00           C
ATOM   2488  HA  SER A 362      45.764  39.661  61.806  1.00  0.00           H
ATOM   2489  CB  SER A 362      44.230  38.421  60.821  1.00  0.00           C
ATOM   2490  HB1 SER A 362      44.348  38.617  59.733  1.00  0.00           H
ATOM   2491  HB2 SER A 362      43.856  37.382  60.942  1.00  0.00           H
ATOM   2492  OG  SER A 362      43.319  39.376  61.357  1.00  0.00           O
ATOM   2493  HG1 SER A 362      42.733  39.662  60.653  1.00  0.00           H
ATOM   2494  C   SER A 362      45.492  37.981  62.976  1.00  0.00           C
ATOM   2495  O   SER A 362      46.030  36.926  63.276  1.00  0.00           O
ATOM   2496  N   CYS A 363      44.731  38.623  63.851  1.00  0.00           N
ATOM   2497  HN  CYS A 363      44.217  39.439  63.597  1.00  0.00           H
ATOM   2498  CA  CYS A 363      44.300  37.995  65.092  1.00  0.00           C
ATOM   2499  HA  CYS A 363      45.113  37.383  65.453  1.00  0.00           H
ATOM   2500  CB  CYS A 363      43.855  39.001  66.213  1.00  0.00           C
ATOM   2501  HB1 CYS A 363      43.323  39.840  65.714  1.00  0.00           H
ATOM   2502  HB2 CYS A 363      43.218  38.435  66.926  1.00  0.00           H
ATOM   2503  SG  CYS A 363      45.284  39.623  67.030  1.00  0.00           S
ATOM   2504  HG1 CYS A 363      45.730  38.535  67.639  1.00  0.00           H
ATOM   2505  C   CYS A 363      43.076  37.090  64.831  1.00  0.00           C
ATOM   2506  O   CYS A 363      42.886  36.147  65.635  1.00  0.00           O
ATOM   2507  N   TYR A 364      42.320  37.334  63.744  1.00  0.00           N
ATOM   2508  HN  TYR A 364      42.444  38.036  63.047  1.00  0.00           H
ATOM   2509  CA  TYR A 364      40.931  36.872  63.610  1.00  0.00           C
ATOM   2510  HA  TYR A 364      40.606  36.458  64.553  1.00  0.00           H
ATOM   2511  CB  TYR A 364      40.104  38.073  63.123  1.00  0.00           C
ATOM   2512  HB1 TYR A 364      40.577  38.439  62.187  1.00  0.00           H
ATOM   2513  HB2 TYR A 364      39.043  37.864  62.869  1.00  0.00           H
ATOM   2514  CG  TYR A 364      40.220  39.323  64.004  1.00  0.00           C
ATOM   2515  CD1 TYR A 364      40.344  40.619  63.449  1.00  0.00           C
ATOM   2516  HD1 TYR A 364      40.517  40.705  62.387  1.00  0.00           H
ATOM   2517  CE1 TYR A 364      40.167  41.743  64.208  1.00  0.00           C
ATOM   2518  HE1 TYR A 364      40.133  42.716  63.742  1.00  0.00           H
ATOM   2519  CZ  TYR A 364      40.055  41.717  65.608  1.00  0.00           C
ATOM   2520  OH  TYR A 364      39.818  42.912  66.348  1.00  0.00           O
ATOM   2521  HH  TYR A 364      39.881  43.672  65.764  1.00  0.00           H
ATOM   2522  CD2 TYR A 364      39.895  39.226  65.380  1.00  0.00           C
ATOM   2523  HD2 TYR A 364      39.574  38.324  65.879  1.00  0.00           H
ATOM   2524  CE2 TYR A 364      39.852  40.402  66.202  1.00  0.00           C
ATOM   2525  HE2 TYR A 364      39.699  40.317  67.267  1.00  0.00           H
ATOM   2526  C   TYR A 364      40.868  35.592  62.677  1.00  0.00           C
ATOM   2527  O   TYR A 364      41.762  35.185  61.958  1.00  0.00           O
ATOM   2528  N   ALA A 365      39.762  34.842  62.889  1.00  0.00           N
ATOM   2529  HN  ALA A 365      39.062  35.268  63.458  1.00  0.00           H
ATOM   2530  CA  ALA A 365      39.571  33.632  62.263  1.00  0.00           C
ATOM   2531  HA  ALA A 365      40.107  33.576  61.327  1.00  0.00           H
ATOM   2532  CB  ALA A 365      39.783  32.415  63.232  1.00  0.00           C
ATOM   2533  HB1 ALA A 365      39.601  31.430  62.753  1.00  0.00           H
ATOM   2534  HB2 ALA A 365      40.857  32.511  63.503  1.00  0.00           H
ATOM   2535  HB3 ALA A 365      39.102  32.546  64.100  1.00  0.00           H
ATOM   2536  C   ALA A 365      38.104  33.628  61.751  1.00  0.00           C
ATOM   2537  O   ALA A 365      37.345  34.511  62.179  1.00  0.00           O
ATOM   2538  N   VAL A 366      37.631  32.620  61.063  1.00  0.00           N
ATOM   2539  HN  VAL A 366      38.203  31.864  60.753  1.00  0.00           H
ATOM   2540  CA  VAL A 366      36.221  32.472  60.713  1.00  0.00           C
ATOM   2541  HA  VAL A 366      35.907  33.280  60.069  1.00  0.00           H
ATOM   2542  CB  VAL A 366      36.101  31.071  59.946  1.00  0.00           C
ATOM   2543  HB  VAL A 366      36.762  31.277  59.077  1.00  0.00           H
ATOM   2544  CG1 VAL A 366      36.509  29.912  60.908  1.00  0.00           C
ATOM   2545 1HG1 VAL A 366      36.444  28.950  60.356  1.00  0.00           H
ATOM   2546 2HG1 VAL A 366      37.576  30.002  61.206  1.00  0.00           H
ATOM   2547 3HG1 VAL A 366      35.882  29.858  61.824  1.00  0.00           H
ATOM   2548  CG2 VAL A 366      34.673  30.915  59.327  1.00  0.00           C
ATOM   2549 1HG2 VAL A 366      34.568  29.975  58.745  1.00  0.00           H
ATOM   2550 2HG2 VAL A 366      34.019  31.001  60.221  1.00  0.00           H
ATOM   2551 3HG2 VAL A 366      34.387  31.740  58.640  1.00  0.00           H
ATOM   2552  C   VAL A 366      35.226  32.657  61.920  1.00  0.00           C
ATOM   2553  O   VAL A 366      35.503  32.169  62.985  1.00  0.00           O
ATOM   2554  N   ILE A 367      34.099  33.305  61.840  1.00  0.00           N
ATOM   2555  HN  ILE A 367      33.771  33.637  60.959  1.00  0.00           H
ATOM   2556  CA  ILE A 367      33.216  33.439  63.007  1.00  0.00           C
ATOM   2557  HA  ILE A 367      33.428  32.792  63.845  1.00  0.00           H
ATOM   2558  CB  ILE A 367      33.162  34.863  63.563  1.00  0.00           C
ATOM   2559  HB  ILE A 367      34.208  35.195  63.736  1.00  0.00           H
ATOM   2560  CG2 ILE A 367      32.600  35.835  62.457  1.00  0.00           C
ATOM   2561 1HG2 ILE A 367      31.571  35.549  62.149  1.00  0.00           H
ATOM   2562 2HG2 ILE A 367      32.619  36.907  62.748  1.00  0.00           H
ATOM   2563 3HG2 ILE A 367      33.207  35.896  61.528  1.00  0.00           H
ATOM   2564  CG1 ILE A 367      32.471  35.033  65.016  1.00  0.00           C
ATOM   2565 1HG1 ILE A 367      31.370  35.048  64.871  1.00  0.00           H
ATOM   2566 2HG1 ILE A 367      32.875  34.200  65.630  1.00  0.00           H
ATOM   2567  CD  ILE A 367      32.689  36.318  65.825  1.00  0.00           C
ATOM   2568  HD1 ILE A 367      32.619  37.263  65.246  1.00  0.00           H
ATOM   2569  HD2 ILE A 367      31.827  36.456  66.512  1.00  0.00           H
ATOM   2570  HD3 ILE A 367      33.668  36.296  66.350  1.00  0.00           H
ATOM   2571  C   ILE A 367      31.773  33.084  62.657  1.00  0.00           C
ATOM   2572  O   ILE A 367      30.879  33.002  63.513  1.00  0.00           O
ATOM   2573  N   GLU A 368      31.396  32.769  61.375  1.00  0.00           N
ATOM   2574  HN  GLU A 368      32.099  32.977  60.699  1.00  0.00           H
ATOM   2575  CA  GLU A 368      30.060  32.363  60.950  1.00  0.00           C
ATOM   2576  HA  GLU A 368      29.341  32.951  61.501  1.00  0.00           H
ATOM   2577  CB  GLU A 368      29.872  32.797  59.463  1.00  0.00           C
ATOM   2578  HB1 GLU A 368      28.784  32.597  59.358  1.00  0.00           H
ATOM   2579  HB2 GLU A 368      30.049  33.877  59.276  1.00  0.00           H
ATOM   2580  CG  GLU A 368      30.481  31.932  58.361  1.00  0.00           C
ATOM   2581  HG1 GLU A 368      31.525  32.134  58.039  1.00  0.00           H
ATOM   2582  HG2 GLU A 368      30.545  30.885  58.726  1.00  0.00           H
ATOM   2583  CD  GLU A 368      29.609  31.907  57.056  1.00  0.00           C
ATOM   2584  OE1 GLU A 368      28.795  30.943  56.789  1.00  0.00           O
ATOM   2585  OE2 GLU A 368      29.786  32.935  56.289  1.00  0.00           O
ATOM   2586  C   GLU A 368      29.799  30.892  61.294  1.00  0.00           C
ATOM   2587  O   GLU A 368      28.635  30.437  61.370  1.00  0.00           O
ATOM   2588  N   GLU A 369      30.886  30.128  61.570  1.00  0.00           N
ATOM   2589  HN  GLU A 369      31.782  30.565  61.592  1.00  0.00           H
ATOM   2590  CA  GLU A 369      30.867  28.711  61.983  1.00  0.00           C
ATOM   2591  HA  GLU A 369      29.931  28.261  61.689  1.00  0.00           H
ATOM   2592  CB  GLU A 369      32.092  28.038  61.286  1.00  0.00           C
ATOM   2593  HB1 GLU A 369      31.893  28.374  60.246  1.00  0.00           H
ATOM   2594  HB2 GLU A 369      33.001  28.546  61.673  1.00  0.00           H
ATOM   2595  CG  GLU A 369      32.321  26.547  61.439  1.00  0.00           C
ATOM   2596  HG1 GLU A 369      33.325  26.400  60.986  1.00  0.00           H
ATOM   2597  HG2 GLU A 369      32.223  26.388  62.535  1.00  0.00           H
ATOM   2598  CD  GLU A 369      31.354  25.660  60.653  1.00  0.00           C
ATOM   2599  OE1 GLU A 369      30.472  25.030  61.300  1.00  0.00           O
ATOM   2600  OE2 GLU A 369      31.475  25.613  59.408  1.00  0.00           O
ATOM   2601  C   GLU A 369      31.009  28.514  63.473  1.00  0.00           C
ATOM   2602  O   GLU A 369      31.983  29.059  63.983  1.00  0.00           O
ATOM   2603  N   HIS A 370      30.098  27.752  64.089  1.00  0.00           N
ATOM   2604  HN  HIS A 370      29.442  27.154  63.635  1.00  0.00           H
ATOM   2605  CA  HIS A 370      29.756  27.665  65.508  1.00  0.00           C
ATOM   2606  HA  HIS A 370      29.447  28.632  65.877  1.00  0.00           H
ATOM   2607  CB  HIS A 370      28.650  26.679  65.764  1.00  0.00           C
ATOM   2608  HB1 HIS A 370      29.044  25.722  65.362  1.00  0.00           H
ATOM   2609  HB2 HIS A 370      28.422  26.641  66.851  1.00  0.00           H
ATOM   2610  ND1 HIS A 370      26.765  28.224  65.559  1.00  0.00           N
ATOM   2611  CG  HIS A 370      27.381  27.068  65.073  1.00  0.00           C
ATOM   2612  CE1 HIS A 370      25.560  28.237  65.011  1.00  0.00           C
ATOM   2613  HE1 HIS A 370      24.785  29.002  65.043  1.00  0.00           H
ATOM   2614  NE2 HIS A 370      25.341  27.091  64.308  1.00  0.00           N
ATOM   2615  HE2 HIS A 370      24.517  26.866  63.789  1.00  0.00           H
ATOM   2616  CD2 HIS A 370      26.539  26.340  64.376  1.00  0.00           C
ATOM   2617  HD2 HIS A 370      26.785  25.420  63.860  1.00  0.00           H
ATOM   2618  C   HIS A 370      30.882  27.215  66.449  1.00  0.00           C
ATOM   2619  O   HIS A 370      30.981  27.689  67.590  1.00  0.00           O
ATOM   2620  N   SER A 371      31.700  26.281  66.087  1.00  0.00           N
ATOM   2621  HN  SER A 371      31.721  25.891  65.170  1.00  0.00           H
ATOM   2622  CA  SER A 371      32.867  25.883  66.937  1.00  0.00           C
ATOM   2623  HA  SER A 371      32.547  25.674  67.947  1.00  0.00           H
ATOM   2624  CB  SER A 371      33.482  24.540  66.435  1.00  0.00           C
ATOM   2625  HB1 SER A 371      34.336  24.283  67.097  1.00  0.00           H
ATOM   2626  HB2 SER A 371      32.734  23.739  66.616  1.00  0.00           H
ATOM   2627  OG  SER A 371      33.802  24.543  65.004  1.00  0.00           O
ATOM   2628  HG1 SER A 371      34.055  23.635  64.819  1.00  0.00           H
ATOM   2629  C   SER A 371      33.905  26.965  67.081  1.00  0.00           C
ATOM   2630  O   SER A 371      34.526  27.172  68.129  1.00  0.00           O
ATOM   2631  N   TRP A 372      34.015  27.839  66.037  1.00  0.00           N
ATOM   2632  HN  TRP A 372      33.481  27.748  65.200  1.00  0.00           H
ATOM   2633  CA  TRP A 372      34.977  28.905  65.964  1.00  0.00           C
ATOM   2634  HA  TRP A 372      35.830  28.568  66.534  1.00  0.00           H
ATOM   2635  CB  TRP A 372      35.302  29.124  64.511  1.00  0.00           C
ATOM   2636  HB1 TRP A 372      34.410  29.314  63.877  1.00  0.00           H
ATOM   2637  HB2 TRP A 372      35.975  30.002  64.404  1.00  0.00           H
ATOM   2638  CG  TRP A 372      36.084  27.999  63.890  1.00  0.00           C
ATOM   2639  CD1 TRP A 372      35.621  26.833  63.470  1.00  0.00           C
ATOM   2640  HD1 TRP A 372      34.593  26.536  63.617  1.00  0.00           H
ATOM   2641  NE1 TRP A 372      36.689  26.154  62.848  1.00  0.00           N
ATOM   2642  HE1 TRP A 372      36.723  25.405  62.222  1.00  0.00           H
ATOM   2643  CE2 TRP A 372      37.835  26.857  62.927  1.00  0.00           C
ATOM   2644  CD2 TRP A 372      37.478  28.028  63.589  1.00  0.00           C
ATOM   2645  CE3 TRP A 372      38.478  28.966  63.761  1.00  0.00           C
ATOM   2646  HE3 TRP A 372      38.225  29.829  64.359  1.00  0.00           H
ATOM   2647  CZ3 TRP A 372      39.829  28.720  63.379  1.00  0.00           C
ATOM   2648  HZ3 TRP A 372      40.638  29.351  63.718  1.00  0.00           H
ATOM   2649  CZ2 TRP A 372      39.081  26.635  62.325  1.00  0.00           C
ATOM   2650  HZ2 TRP A 372      39.271  25.661  61.898  1.00  0.00           H
ATOM   2651  CH2 TRP A 372      40.122  27.552  62.768  1.00  0.00           C
ATOM   2652  HH2 TRP A 372      41.153  27.382  62.494  1.00  0.00           H
ATOM   2653  C   TRP A 372      34.399  30.205  66.545  1.00  0.00           C
ATOM   2654  O   TRP A 372      35.148  31.098  66.950  1.00  0.00           O
ATOM   2655  N   ALA A 373      33.056  30.326  66.583  1.00  0.00           N
ATOM   2656  HN  ALA A 373      32.460  29.621  66.206  1.00  0.00           H
ATOM   2657  CA  ALA A 373      32.456  31.450  67.303  1.00  0.00           C
ATOM   2658  HA  ALA A 373      32.633  32.404  66.829  1.00  0.00           H
ATOM   2659  CB  ALA A 373      30.966  31.316  67.053  1.00  0.00           C
ATOM   2660  HB1 ALA A 373      30.447  32.150  67.573  1.00  0.00           H
ATOM   2661  HB2 ALA A 373      30.698  31.339  65.975  1.00  0.00           H
ATOM   2662  HB3 ALA A 373      30.609  30.346  67.461  1.00  0.00           H
ATOM   2663  C   ALA A 373      32.743  31.494  68.770  1.00  0.00           C
ATOM   2664  O   ALA A 373      32.661  32.511  69.477  1.00  0.00           O
ATOM   2665  N   HSE A 374      32.966  30.335  69.397  1.00  0.00           N
ATOM   2666  HN  HSE A 374      32.810  29.469  68.929  1.00  0.00           H
ATOM   2667  CA  HSE A 374      33.128  30.181  70.849  1.00  0.00           C
ATOM   2668  HA  HSE A 374      32.169  30.524  71.209  1.00  0.00           H
ATOM   2669  CB  HSE A 374      33.379  28.691  71.262  1.00  0.00           C
ATOM   2670  HB1 HSE A 374      34.212  28.329  70.623  1.00  0.00           H
ATOM   2671  HB2 HSE A 374      33.741  28.705  72.313  1.00  0.00           H
ATOM   2672  ND1 HSE A 374      30.931  28.201  71.328  1.00  0.00           N
ATOM   2673  CG  HSE A 374      32.195  27.870  70.897  1.00  0.00           C
ATOM   2674  CE1 HSE A 374      30.232  27.062  70.995  1.00  0.00           C
ATOM   2675  HE1 HSE A 374      29.196  26.854  71.261  1.00  0.00           H
ATOM   2676  NE2 HSE A 374      31.012  26.085  70.471  1.00  0.00           N
ATOM   2677  HE2 HSE A 374      30.862  25.099  70.533  1.00  0.00           H
ATOM   2678  CD2 HSE A 374      32.220  26.609  70.340  1.00  0.00           C
ATOM   2679  HD2 HSE A 374      33.096  26.085  69.980  1.00  0.00           H
ATOM   2680  C   HSE A 374      34.315  30.992  71.394  1.00  0.00           C
ATOM   2681  O   HSE A 374      34.176  31.555  72.499  1.00  0.00           O
ATOM   2682  N   ARG A 375      35.476  31.115  70.739  1.00  0.00           N
ATOM   2683  HN  ARG A 375      35.689  30.710  69.854  1.00  0.00           H
ATOM   2684  CA  ARG A 375      36.603  31.864  71.226  1.00  0.00           C
ATOM   2685  HA  ARG A 375      36.875  31.633  72.245  1.00  0.00           H
ATOM   2686  CB  ARG A 375      37.836  31.428  70.370  1.00  0.00           C
ATOM   2687  HB1 ARG A 375      38.716  31.797  70.939  1.00  0.00           H
ATOM   2688  HB2 ARG A 375      37.859  30.322  70.476  1.00  0.00           H
ATOM   2689  CG  ARG A 375      37.826  31.931  68.958  1.00  0.00           C
ATOM   2690  HG1 ARG A 375      36.768  31.935  68.620  1.00  0.00           H
ATOM   2691  HG2 ARG A 375      38.244  32.956  68.869  1.00  0.00           H
ATOM   2692  CD  ARG A 375      38.724  31.156  67.946  1.00  0.00           C
ATOM   2693  HD1 ARG A 375      38.488  31.396  66.888  1.00  0.00           H
ATOM   2694  HD2 ARG A 375      39.774  31.361  68.247  1.00  0.00           H
ATOM   2695  NE  ARG A 375      38.386  29.761  68.075  1.00  0.00           N
ATOM   2696  HE  ARG A 375      37.700  29.525  68.763  1.00  0.00           H
ATOM   2697  CZ  ARG A 375      39.061  28.815  67.412  1.00  0.00           C
ATOM   2698  NH1 ARG A 375      40.028  28.893  66.567  1.00  0.00           N
ATOM   2699 1HH1 ARG A 375      40.540  29.750  66.524  1.00  0.00           H
ATOM   2700 2HH1 ARG A 375      40.528  28.086  66.252  1.00  0.00           H
ATOM   2701  NH2 ARG A 375      38.623  27.574  67.624  1.00  0.00           N
ATOM   2702 1HH2 ARG A 375      37.976  27.405  68.367  1.00  0.00           H
ATOM   2703 2HH2 ARG A 375      39.113  26.809  67.206  1.00  0.00           H
ATOM   2704  C   ARG A 375      36.380  33.397  71.191  1.00  0.00           C
ATOM   2705  O   ARG A 375      36.996  34.283  71.864  1.00  0.00           O
ATOM   2706  N   ALA A 376      35.326  33.853  70.430  1.00  0.00           N
ATOM   2707  HN  ALA A 376      34.905  33.230  69.775  1.00  0.00           H
ATOM   2708  CA  ALA A 376      34.947  35.191  70.192  1.00  0.00           C
ATOM   2709  HA  ALA A 376      35.867  35.751  70.116  1.00  0.00           H
ATOM   2710  CB  ALA A 376      34.457  35.224  68.726  1.00  0.00           C
ATOM   2711  HB1 ALA A 376      33.515  34.663  68.543  1.00  0.00           H
ATOM   2712  HB2 ALA A 376      34.400  36.263  68.336  1.00  0.00           H
ATOM   2713  HB3 ALA A 376      35.242  34.707  68.135  1.00  0.00           H
ATOM   2714  C   ALA A 376      33.912  35.631  71.184  1.00  0.00           C
ATOM   2715  O   ALA A 376      33.942  36.797  71.666  1.00  0.00           O
ATOM   2716  N   PHE A 377      32.996  34.694  71.580  1.00  0.00           N
ATOM   2717  HN  PHE A 377      32.911  33.833  71.085  1.00  0.00           H
ATOM   2718  CA  PHE A 377      32.106  34.795  72.734  1.00  0.00           C
ATOM   2719  HA  PHE A 377      31.402  35.605  72.615  1.00  0.00           H
ATOM   2720  CB  PHE A 377      31.218  33.529  72.542  1.00  0.00           C
ATOM   2721  HB1 PHE A 377      30.531  33.745  71.696  1.00  0.00           H
ATOM   2722  HB2 PHE A 377      31.879  32.673  72.284  1.00  0.00           H
ATOM   2723  CG  PHE A 377      30.309  33.209  73.692  1.00  0.00           C
ATOM   2724  CD1 PHE A 377      29.237  34.077  74.060  1.00  0.00           C
ATOM   2725  HD1 PHE A 377      29.144  34.984  73.481  1.00  0.00           H
ATOM   2726  CE1 PHE A 377      28.332  33.734  75.088  1.00  0.00           C
ATOM   2727  HE1 PHE A 377      27.472  34.362  75.270  1.00  0.00           H
ATOM   2728  CZ  PHE A 377      28.507  32.509  75.743  1.00  0.00           C
ATOM   2729  HZ  PHE A 377      27.697  32.143  76.357  1.00  0.00           H
ATOM   2730  CD2 PHE A 377      30.449  32.016  74.443  1.00  0.00           C
ATOM   2731  HD2 PHE A 377      31.147  31.242  74.157  1.00  0.00           H
ATOM   2732  CE2 PHE A 377      29.490  31.662  75.402  1.00  0.00           C
ATOM   2733  HE2 PHE A 377      29.586  30.711  75.906  1.00  0.00           H
ATOM   2734  C   PHE A 377      32.678  34.893  74.154  1.00  0.00           C
ATOM   2735  O   PHE A 377      32.151  35.613  75.053  1.00  0.00           O
ATOM   2736  N   ALA A 378      33.796  34.161  74.458  1.00  0.00           N
ATOM   2737  HN  ALA A 378      34.239  33.561  73.797  1.00  0.00           H
ATOM   2738  CA  ALA A 378      34.569  34.309  75.668  1.00  0.00           C
ATOM   2739  HA  ALA A 378      33.953  33.980  76.492  1.00  0.00           H
ATOM   2740  CB  ALA A 378      35.757  33.383  75.794  1.00  0.00           C
ATOM   2741  HB1 ALA A 378      36.401  33.544  76.685  1.00  0.00           H
ATOM   2742  HB2 ALA A 378      35.286  32.378  75.835  1.00  0.00           H
ATOM   2743  HB3 ALA A 378      36.338  33.453  74.850  1.00  0.00           H
ATOM   2744  C   ALA A 378      35.012  35.694  76.141  1.00  0.00           C
ATOM   2745  O   ALA A 378      34.793  36.020  77.299  1.00  0.00           O
ATOM   2746  N   PRO A 379      35.543  36.573  75.296  1.00  0.00           N
ATOM   2747  CD  PRO A 379      36.389  36.239  74.187  1.00  0.00           C
ATOM   2748  HD1 PRO A 379      35.861  35.536  73.508  1.00  0.00           H
ATOM   2749  HD2 PRO A 379      37.221  35.619  74.584  1.00  0.00           H
ATOM   2750  CA  PRO A 379      35.624  38.037  75.586  1.00  0.00           C
ATOM   2751  HA  PRO A 379      35.806  38.181  76.640  1.00  0.00           H
ATOM   2752  CB  PRO A 379      36.667  38.526  74.588  1.00  0.00           C
ATOM   2753  HB1 PRO A 379      36.492  39.567  74.241  1.00  0.00           H
ATOM   2754  HB2 PRO A 379      37.679  38.485  75.044  1.00  0.00           H
ATOM   2755  CG  PRO A 379      36.723  37.474  73.479  1.00  0.00           C
ATOM   2756  HG1 PRO A 379      35.850  37.735  72.843  1.00  0.00           H
ATOM   2757  HG2 PRO A 379      37.634  37.603  72.857  1.00  0.00           H
ATOM   2758  C   PRO A 379      34.281  38.680  75.385  1.00  0.00           C
ATOM   2759  O   PRO A 379      33.935  39.539  76.185  1.00  0.00           O
ATOM   2760  N   PHE A 380      33.503  38.430  74.280  1.00  0.00           N
ATOM   2761  HN  PHE A 380      33.717  37.643  73.706  1.00  0.00           H
ATOM   2762  CA  PHE A 380      32.195  39.079  73.983  1.00  0.00           C
ATOM   2763  HA  PHE A 380      32.517  40.106  74.072  1.00  0.00           H
ATOM   2764  CB  PHE A 380      31.634  38.765  72.612  1.00  0.00           C
ATOM   2765  HB1 PHE A 380      32.354  39.159  71.864  1.00  0.00           H
ATOM   2766  HB2 PHE A 380      31.607  37.684  72.357  1.00  0.00           H
ATOM   2767  CG  PHE A 380      30.250  39.295  72.422  1.00  0.00           C
ATOM   2768  CD1 PHE A 380      29.131  38.439  72.594  1.00  0.00           C
ATOM   2769  HD1 PHE A 380      29.359  37.464  72.998  1.00  0.00           H
ATOM   2770  CE1 PHE A 380      27.813  38.852  72.496  1.00  0.00           C
ATOM   2771  HE1 PHE A 380      27.030  38.169  72.790  1.00  0.00           H
ATOM   2772  CZ  PHE A 380      27.565  40.188  72.129  1.00  0.00           C
ATOM   2773  HZ  PHE A 380      26.559  40.555  71.989  1.00  0.00           H
ATOM   2774  CD2 PHE A 380      29.932  40.580  72.006  1.00  0.00           C
ATOM   2775  HD2 PHE A 380      30.743  41.244  71.746  1.00  0.00           H
ATOM   2776  CE2 PHE A 380      28.625  41.002  71.820  1.00  0.00           C
ATOM   2777  HE2 PHE A 380      28.394  41.996  71.468  1.00  0.00           H
ATOM   2778  C   PHE A 380      31.219  39.062  75.163  1.00  0.00           C
ATOM   2779  O   PHE A 380      30.676  40.064  75.584  1.00  0.00           O
ATOM   2780  N   ARG A 381      31.125  37.959  75.876  1.00  0.00           N
ATOM   2781  HN  ARG A 381      31.564  37.102  75.617  1.00  0.00           H
ATOM   2782  CA  ARG A 381      30.095  37.945  76.933  1.00  0.00           C
ATOM   2783  HA  ARG A 381      29.126  38.108  76.486  1.00  0.00           H
ATOM   2784  CB  ARG A 381      29.929  36.487  77.448  1.00  0.00           C
ATOM   2785  HB1 ARG A 381      29.106  36.503  78.194  1.00  0.00           H
ATOM   2786  HB2 ARG A 381      29.530  35.955  76.558  1.00  0.00           H
ATOM   2787  CG  ARG A 381      31.182  35.813  78.127  1.00  0.00           C
ATOM   2788  HG1 ARG A 381      32.078  36.142  77.559  1.00  0.00           H
ATOM   2789  HG2 ARG A 381      31.311  36.159  79.175  1.00  0.00           H
ATOM   2790  CD  ARG A 381      31.078  34.294  77.980  1.00  0.00           C
ATOM   2791  HD1 ARG A 381      30.526  34.047  77.048  1.00  0.00           H
ATOM   2792  HD2 ARG A 381      32.071  33.803  77.887  1.00  0.00           H
ATOM   2793  NE  ARG A 381      30.226  33.856  79.143  1.00  0.00           N
ATOM   2794  HE  ARG A 381      29.229  33.790  79.093  1.00  0.00           H
ATOM   2795  CZ  ARG A 381      30.439  33.776  80.472  1.00  0.00           C
ATOM   2796  NH1 ARG A 381      31.566  34.010  81.112  1.00  0.00           N
ATOM   2797 1HH1 ARG A 381      32.399  34.160  80.581  1.00  0.00           H
ATOM   2798 2HH1 ARG A 381      31.628  34.240  82.083  1.00  0.00           H
ATOM   2799  NH2 ARG A 381      29.366  33.554  81.185  1.00  0.00           N
ATOM   2800 1HH2 ARG A 381      28.606  33.197  80.642  1.00  0.00           H
ATOM   2801 2HH2 ARG A 381      29.340  33.529  82.185  1.00  0.00           H
ATOM   2802  C   ARG A 381      30.371  38.778  78.151  1.00  0.00           C
ATOM   2803  O   ARG A 381      29.368  39.162  78.711  1.00  0.00           O
ATOM   2804  N   LEU A 382      31.640  39.070  78.541  1.00  0.00           N
ATOM   2805  HN  LEU A 382      32.374  38.628  78.031  1.00  0.00           H
ATOM   2806  CA  LEU A 382      31.943  40.048  79.584  1.00  0.00           C
ATOM   2807  HA  LEU A 382      31.524  39.757  80.536  1.00  0.00           H
ATOM   2808  CB  LEU A 382      33.496  40.114  79.676  1.00  0.00           C
ATOM   2809  HB1 LEU A 382      33.910  40.733  78.851  1.00  0.00           H
ATOM   2810  HB2 LEU A 382      33.758  40.667  80.603  1.00  0.00           H
ATOM   2811  CG  LEU A 382      34.226  38.750  79.729  1.00  0.00           C
ATOM   2812  HG  LEU A 382      34.014  38.168  78.807  1.00  0.00           H
ATOM   2813  CD1 LEU A 382      35.766  38.853  79.627  1.00  0.00           C
ATOM   2814 1HD1 LEU A 382      36.286  39.390  80.449  1.00  0.00           H
ATOM   2815 2HD1 LEU A 382      36.012  37.773  79.540  1.00  0.00           H
ATOM   2816 3HD1 LEU A 382      36.102  39.159  78.613  1.00  0.00           H
ATOM   2817  CD2 LEU A 382      33.788  38.072  80.955  1.00  0.00           C
ATOM   2818 1HD2 LEU A 382      34.304  38.563  81.807  1.00  0.00           H
ATOM   2819 2HD2 LEU A 382      32.689  38.026  81.111  1.00  0.00           H
ATOM   2820 3HD2 LEU A 382      34.135  37.019  80.876  1.00  0.00           H
ATOM   2821  C   LEU A 382      31.388  41.432  79.276  1.00  0.00           C
ATOM   2822  O   LEU A 382      30.687  42.116  80.043  1.00  0.00           O
ATOM   2823  N   ALA A 383      31.655  41.679  78.028  1.00  0.00           N
ATOM   2824  HN  ALA A 383      32.285  41.033  77.604  1.00  0.00           H
ATOM   2825  CA  ALA A 383      31.295  42.912  77.392  1.00  0.00           C
ATOM   2826  HA  ALA A 383      31.560  43.748  78.022  1.00  0.00           H
ATOM   2827  CB  ALA A 383      32.154  43.006  76.112  1.00  0.00           C
ATOM   2828  HB1 ALA A 383      33.194  42.717  76.378  1.00  0.00           H
ATOM   2829  HB2 ALA A 383      31.885  42.309  75.290  1.00  0.00           H
ATOM   2830  HB3 ALA A 383      32.326  44.044  75.753  1.00  0.00           H
ATOM   2831  C   ALA A 383      29.875  43.096  77.091  1.00  0.00           C
ATOM   2832  O   ALA A 383      29.322  44.150  77.243  1.00  0.00           O
ATOM   2833  N   HSE A 384      29.122  42.077  76.640  1.00  0.00           N
ATOM   2834  HN  HSE A 384      29.577  41.251  76.314  1.00  0.00           H
ATOM   2835  CA  HSE A 384      27.699  42.176  76.425  1.00  0.00           C
ATOM   2836  HA  HSE A 384      27.633  43.001  75.732  1.00  0.00           H
ATOM   2837  CB  HSE A 384      27.302  40.827  75.800  1.00  0.00           C
ATOM   2838  HB1 HSE A 384      27.849  40.813  74.833  1.00  0.00           H
ATOM   2839  HB2 HSE A 384      27.844  39.920  76.142  1.00  0.00           H
ATOM   2840  ND1 HSE A 384      25.148  39.731  76.090  1.00  0.00           N
ATOM   2841  CG  HSE A 384      25.912  40.639  75.457  1.00  0.00           C
ATOM   2842  CE1 HSE A 384      23.914  40.035  75.645  1.00  0.00           C
ATOM   2843  HE1 HSE A 384      23.060  39.363  75.733  1.00  0.00           H
ATOM   2844  NE2 HSE A 384      23.838  41.032  74.799  1.00  0.00           N
ATOM   2845  HE2 HSE A 384      23.028  41.374  74.322  1.00  0.00           H
ATOM   2846  CD2 HSE A 384      25.138  41.444  74.693  1.00  0.00           C
ATOM   2847  HD2 HSE A 384      25.479  42.263  74.071  1.00  0.00           H
ATOM   2848  C   HSE A 384      26.936  42.368  77.715  1.00  0.00           C
ATOM   2849  O   HSE A 384      25.943  43.127  77.701  1.00  0.00           O
ATOM   2850  N   ALA A 385      27.514  41.776  78.768  1.00  0.00           N
ATOM   2851  HN  ALA A 385      28.342  41.228  78.676  1.00  0.00           H
ATOM   2852  CA  ALA A 385      26.889  41.856  80.075  1.00  0.00           C
ATOM   2853  HA  ALA A 385      25.825  41.684  80.003  1.00  0.00           H
ATOM   2854  CB  ALA A 385      27.369  40.810  81.117  1.00  0.00           C
ATOM   2855  HB1 ALA A 385      26.969  41.016  82.133  1.00  0.00           H
ATOM   2856  HB2 ALA A 385      27.059  39.773  80.870  1.00  0.00           H
ATOM   2857  HB3 ALA A 385      28.478  40.840  81.057  1.00  0.00           H
ATOM   2858  C   ALA A 385      26.972  43.208  80.616  1.00  0.00           C
ATOM   2859  O   ALA A 385      26.023  43.660  81.197  1.00  0.00           O
ATOM   2860  N   LEU A 386      28.099  43.958  80.414  1.00  0.00           N
ATOM   2861  HN  LEU A 386      28.931  43.478  80.148  1.00  0.00           H
ATOM   2862  CA  LEU A 386      28.219  45.403  80.804  1.00  0.00           C
ATOM   2863  HA  LEU A 386      27.801  45.453  81.798  1.00  0.00           H
ATOM   2864  CB  LEU A 386      29.727  45.912  80.727  1.00  0.00           C
ATOM   2865  HB1 LEU A 386      30.220  45.552  79.799  1.00  0.00           H
ATOM   2866  HB2 LEU A 386      29.694  47.021  80.781  1.00  0.00           H
ATOM   2867  CG  LEU A 386      30.734  45.282  81.681  1.00  0.00           C
ATOM   2868  HG  LEU A 386      30.760  44.204  81.414  1.00  0.00           H
ATOM   2869  CD1 LEU A 386      32.119  45.923  81.418  1.00  0.00           C
ATOM   2870 1HD1 LEU A 386      32.818  45.514  82.178  1.00  0.00           H
ATOM   2871 2HD1 LEU A 386      32.462  45.851  80.364  1.00  0.00           H
ATOM   2872 3HD1 LEU A 386      32.055  46.990  81.719  1.00  0.00           H
ATOM   2873  CD2 LEU A 386      30.283  45.377  83.179  1.00  0.00           C
ATOM   2874 1HD2 LEU A 386      30.029  46.441  83.372  1.00  0.00           H
ATOM   2875 2HD2 LEU A 386      29.317  44.875  83.402  1.00  0.00           H
ATOM   2876 3HD2 LEU A 386      31.134  45.105  83.838  1.00  0.00           H
ATOM   2877  C   LEU A 386      27.307  46.222  79.922  1.00  0.00           C
ATOM   2878  O   LEU A 386      26.521  47.031  80.440  1.00  0.00           O
ATOM   2879  N   LEU A 387      27.360  45.962  78.573  1.00  0.00           N
ATOM   2880  HN  LEU A 387      28.040  45.361  78.162  1.00  0.00           H
ATOM   2881  CA  LEU A 387      26.509  46.741  77.613  1.00  0.00           C
ATOM   2882  HA  LEU A 387      26.840  47.766  77.538  1.00  0.00           H
ATOM   2883  CB  LEU A 387      26.705  46.168  76.184  1.00  0.00           C
ATOM   2884  HB1 LEU A 387      26.657  45.063  76.292  1.00  0.00           H
ATOM   2885  HB2 LEU A 387      25.842  46.419  75.532  1.00  0.00           H
ATOM   2886  CG  LEU A 387      27.981  46.553  75.379  1.00  0.00           C
ATOM   2887  HG  LEU A 387      28.885  46.445  76.016  1.00  0.00           H
ATOM   2888  CD1 LEU A 387      28.166  45.527  74.268  1.00  0.00           C
ATOM   2889 1HD1 LEU A 387      28.972  45.785  73.549  1.00  0.00           H
ATOM   2890 2HD1 LEU A 387      28.413  44.518  74.661  1.00  0.00           H
ATOM   2891 3HD1 LEU A 387      27.296  45.537  73.577  1.00  0.00           H
ATOM   2892  CD2 LEU A 387      27.940  47.968  74.808  1.00  0.00           C
ATOM   2893 1HD2 LEU A 387      28.821  48.228  74.182  1.00  0.00           H
ATOM   2894 2HD2 LEU A 387      26.972  48.143  74.292  1.00  0.00           H
ATOM   2895 3HD2 LEU A 387      28.022  48.599  75.718  1.00  0.00           H
ATOM   2896  C   LEU A 387      24.967  46.650  77.840  1.00  0.00           C
ATOM   2897  O   LEU A 387      24.303  47.683  77.670  1.00  0.00           O
ATOM   2898  N   ALA A 388      24.499  45.407  78.213  1.00  0.00           N
ATOM   2899  HN  ALA A 388      25.155  44.658  78.151  1.00  0.00           H
ATOM   2900  CA  ALA A 388      23.196  44.949  78.662  1.00  0.00           C
ATOM   2901  HA  ALA A 388      22.432  45.410  78.055  1.00  0.00           H
ATOM   2902  CB  ALA A 388      23.174  43.440  78.800  1.00  0.00           C
ATOM   2903  HB1 ALA A 388      23.348  42.918  77.835  1.00  0.00           H
ATOM   2904  HB2 ALA A 388      23.964  43.205  79.545  1.00  0.00           H
ATOM   2905  HB3 ALA A 388      22.173  43.145  79.181  1.00  0.00           H
ATOM   2906  C   ALA A 388      22.797  45.520  80.031  1.00  0.00           C
ATOM   2907  O   ALA A 388      21.721  45.986  80.335  1.00  0.00           O
ATOM   2908  N   ALA A 389      23.755  45.636  81.016  1.00  0.00           N
ATOM   2909  HN  ALA A 389      24.712  45.438  80.821  1.00  0.00           H
ATOM   2910  CA  ALA A 389      23.596  46.373  82.264  1.00  0.00           C
ATOM   2911  HA  ALA A 389      22.710  45.954  82.718  1.00  0.00           H
ATOM   2912  CB  ALA A 389      24.829  46.029  83.170  1.00  0.00           C
ATOM   2913  HB1 ALA A 389      25.717  46.678  83.013  1.00  0.00           H
ATOM   2914  HB2 ALA A 389      24.475  46.029  84.224  1.00  0.00           H
ATOM   2915  HB3 ALA A 389      24.984  44.966  82.887  1.00  0.00           H
ATOM   2916  C   ALA A 389      23.367  47.861  82.180  1.00  0.00           C
ATOM   2917  O   ALA A 389      22.507  48.530  82.793  1.00  0.00           O
ATOM   2918  N   LEU A 390      24.215  48.460  81.327  1.00  0.00           N
ATOM   2919  HN  LEU A 390      24.955  47.844  81.065  1.00  0.00           H
ATOM   2920  CA  LEU A 390      24.359  49.800  80.888  1.00  0.00           C
ATOM   2921  HA  LEU A 390      24.512  50.321  81.822  1.00  0.00           H
ATOM   2922  CB  LEU A 390      25.608  49.939  79.954  1.00  0.00           C
ATOM   2923  HB1 LEU A 390      26.498  49.516  80.468  1.00  0.00           H
ATOM   2924  HB2 LEU A 390      25.472  49.229  79.111  1.00  0.00           H
ATOM   2925  CG  LEU A 390      25.982  51.309  79.386  1.00  0.00           C
ATOM   2926  HG  LEU A 390      25.153  51.858  78.889  1.00  0.00           H
ATOM   2927  CD1 LEU A 390      26.435  52.188  80.556  1.00  0.00           C
ATOM   2928 1HD1 LEU A 390      27.226  51.696  81.162  1.00  0.00           H
ATOM   2929 2HD1 LEU A 390      27.056  53.024  80.171  1.00  0.00           H
ATOM   2930 3HD1 LEU A 390      25.539  52.397  81.180  1.00  0.00           H
ATOM   2931  CD2 LEU A 390      27.169  51.135  78.411  1.00  0.00           C
ATOM   2932 1HD2 LEU A 390      27.701  52.108  78.354  1.00  0.00           H
ATOM   2933 2HD2 LEU A 390      27.846  50.424  78.930  1.00  0.00           H
ATOM   2934 3HD2 LEU A 390      26.922  50.845  77.367  1.00  0.00           H
ATOM   2935  C   LEU A 390      23.242  50.455  80.184  1.00  0.00           C
ATOM   2936  O   LEU A 390      22.793  51.584  80.433  1.00  0.00           O
ATOM   2937  N   ALA A 391      22.671  49.733  79.192  1.00  0.00           N
ATOM   2938  HN  ALA A 391      22.995  48.810  78.995  1.00  0.00           H
ATOM   2939  CA  ALA A 391      21.667  50.185  78.266  1.00  0.00           C
ATOM   2940  HA  ALA A 391      22.018  51.062  77.743  1.00  0.00           H
ATOM   2941  CB  ALA A 391      21.491  49.149  77.161  1.00  0.00           C
ATOM   2942  HB1 ALA A 391      20.834  49.734  76.483  1.00  0.00           H
ATOM   2943  HB2 ALA A 391      22.414  48.941  76.579  1.00  0.00           H
ATOM   2944  HB3 ALA A 391      21.062  48.144  77.364  1.00  0.00           H
ATOM   2945  C   ALA A 391      20.282  50.436  78.888  1.00  0.00           C
ATOM   2946  O   ALA A 391      19.857  49.619  79.738  1.00  0.00           O
ATOM   2947  N   PRO A 392      19.572  51.493  78.509  1.00  0.00           N
ATOM   2948  CD  PRO A 392      20.070  52.496  77.585  1.00  0.00           C
ATOM   2949  HD1 PRO A 392      20.179  52.049  76.574  1.00  0.00           H
ATOM   2950  HD2 PRO A 392      21.025  52.915  77.968  1.00  0.00           H
ATOM   2951  CA  PRO A 392      18.203  51.866  79.033  1.00  0.00           C
ATOM   2952  HA  PRO A 392      18.226  51.683  80.098  1.00  0.00           H
ATOM   2953  CB  PRO A 392      18.064  53.338  78.714  1.00  0.00           C
ATOM   2954  HB1 PRO A 392      16.997  53.593  78.541  1.00  0.00           H
ATOM   2955  HB2 PRO A 392      18.512  53.896  79.564  1.00  0.00           H
ATOM   2956  CG  PRO A 392      18.833  53.481  77.409  1.00  0.00           C
ATOM   2957  HG1 PRO A 392      18.268  53.140  76.516  1.00  0.00           H
ATOM   2958  HG2 PRO A 392      19.109  54.556  77.344  1.00  0.00           H
ATOM   2959  C   PRO A 392      17.108  50.957  78.501  1.00  0.00           C
ATOM   2960  O   PRO A 392      16.165  50.683  79.212  1.00  0.00           O
ATOM   2961  N   ALA A 393      17.283  50.411  77.212  1.00  0.00           N
ATOM   2962  HN  ALA A 393      18.014  50.790  76.651  1.00  0.00           H
ATOM   2963  CA  ALA A 393      16.416  49.435  76.624  1.00  0.00           C
ATOM   2964  HA  ALA A 393      15.420  49.584  77.014  1.00  0.00           H
ATOM   2965  CB  ALA A 393      16.241  49.693  75.094  1.00  0.00           C
ATOM   2966  HB1 ALA A 393      16.002  50.766  74.935  1.00  0.00           H
ATOM   2967  HB2 ALA A 393      17.078  49.214  74.543  1.00  0.00           H
ATOM   2968  HB3 ALA A 393      15.305  49.163  74.817  1.00  0.00           H
ATOM   2969  C   ALA A 393      16.905  48.044  77.010  1.00  0.00           C
ATOM   2970  O   ALA A 393      18.041  47.687  76.702  1.00  0.00           O
ATOM   2971  N   ARG A 394      16.135  47.191  77.726  1.00  0.00           N
ATOM   2972  HN  ARG A 394      15.179  47.425  77.885  1.00  0.00           H
ATOM   2973  CA  ARG A 394      16.582  46.017  78.504  1.00  0.00           C
ATOM   2974  HA  ARG A 394      17.605  46.266  78.748  1.00  0.00           H
ATOM   2975  CB  ARG A 394      15.784  45.903  79.813  1.00  0.00           C
ATOM   2976  HB1 ARG A 394      14.729  45.756  79.497  1.00  0.00           H
ATOM   2977  HB2 ARG A 394      16.158  45.028  80.387  1.00  0.00           H
ATOM   2978  CG  ARG A 394      15.926  47.051  80.781  1.00  0.00           C
ATOM   2979  HG1 ARG A 394      15.547  48.000  80.344  1.00  0.00           H
ATOM   2980  HG2 ARG A 394      15.390  46.825  81.727  1.00  0.00           H
ATOM   2981  CD  ARG A 394      17.378  47.293  81.320  1.00  0.00           C
ATOM   2982  HD1 ARG A 394      17.784  46.312  81.648  1.00  0.00           H
ATOM   2983  HD2 ARG A 394      17.927  47.612  80.408  1.00  0.00           H
ATOM   2984  NE  ARG A 394      17.432  48.363  82.421  1.00  0.00           N
ATOM   2985  HE  ARG A 394      16.610  48.924  82.517  1.00  0.00           H
ATOM   2986  CZ  ARG A 394      18.565  48.835  82.873  1.00  0.00           C
ATOM   2987  NH1 ARG A 394      19.770  48.529  82.433  1.00  0.00           N
ATOM   2988 1HH1 ARG A 394      19.925  48.462  81.447  1.00  0.00           H
ATOM   2989 2HH1 ARG A 394      20.558  48.976  82.856  1.00  0.00           H
ATOM   2990  NH2 ARG A 394      18.494  49.674  83.909  1.00  0.00           N
ATOM   2991 1HH2 ARG A 394      17.601  49.925  84.281  1.00  0.00           H
ATOM   2992 2HH2 ARG A 394      19.332  49.992  84.352  1.00  0.00           H
ATOM   2993  C   ARG A 394      16.756  44.686  77.676  1.00  0.00           C
ATOM   2994  O   ARG A 394      16.138  44.473  76.607  1.00  0.00           O
ATOM   2995  N   THR A 395      17.734  43.919  78.088  1.00  0.00           N
ATOM   2996  HN  THR A 395      18.176  44.203  78.936  1.00  0.00           H
ATOM   2997  CA  THR A 395      18.200  42.728  77.453  1.00  0.00           C
ATOM   2998  HA  THR A 395      17.948  42.776  76.404  1.00  0.00           H
ATOM   2999  CB  THR A 395      19.712  42.511  77.483  1.00  0.00           C
ATOM   3000  HB  THR A 395      20.162  43.013  78.366  1.00  0.00           H
ATOM   3001  OG1 THR A 395      20.280  43.125  76.314  1.00  0.00           O
ATOM   3002  HG1 THR A 395      20.271  44.072  76.472  1.00  0.00           H
ATOM   3003  CG2 THR A 395      20.246  41.085  77.431  1.00  0.00           C
ATOM   3004 1HG2 THR A 395      20.031  40.527  76.495  1.00  0.00           H
ATOM   3005 2HG2 THR A 395      21.304  41.116  77.770  1.00  0.00           H
ATOM   3006 3HG2 THR A 395      19.828  40.423  78.219  1.00  0.00           H
ATOM   3007  C   THR A 395      17.448  41.513  78.002  1.00  0.00           C
ATOM   3008  O   THR A 395      17.624  41.240  79.178  1.00  0.00           O
ATOM   3009  N   ASP A 396      16.558  40.934  77.178  1.00  0.00           N
ATOM   3010  HN  ASP A 396      16.429  41.240  76.238  1.00  0.00           H
ATOM   3011  CA  ASP A 396      15.713  39.725  77.590  1.00  0.00           C
ATOM   3012  HA  ASP A 396      15.027  40.064  78.352  1.00  0.00           H
ATOM   3013  CB  ASP A 396      14.742  39.276  76.491  1.00  0.00           C
ATOM   3014  HB1 ASP A 396      15.307  38.806  75.658  1.00  0.00           H
ATOM   3015  HB2 ASP A 396      14.000  38.628  77.005  1.00  0.00           H
ATOM   3016  CG  ASP A 396      13.972  40.392  75.945  1.00  0.00           C
ATOM   3017  OD1 ASP A 396      14.098  40.608  74.706  1.00  0.00           O
ATOM   3018  OD2 ASP A 396      13.163  41.059  76.611  1.00  0.00           O
ATOM   3019  C   ASP A 396      16.564  38.479  77.950  1.00  0.00           C
ATOM   3020  O   ASP A 396      17.535  38.165  77.279  1.00  0.00           O
ATOM   3021  N   ARG A 397      16.104  37.710  78.976  1.00  0.00           N
ATOM   3022  HN  ARG A 397      15.250  37.941  79.435  1.00  0.00           H
ATOM   3023  CA  ARG A 397      16.850  36.678  79.610  1.00  0.00           C
ATOM   3024  HA  ARG A 397      17.818  36.577  79.141  1.00  0.00           H
ATOM   3025  CB  ARG A 397      16.932  37.166  81.085  1.00  0.00           C
ATOM   3026  HB1 ARG A 397      15.921  37.376  81.495  1.00  0.00           H
ATOM   3027  HB2 ARG A 397      17.290  36.294  81.673  1.00  0.00           H
ATOM   3028  CG  ARG A 397      17.760  38.457  81.292  1.00  0.00           C
ATOM   3029  HG1 ARG A 397      17.431  39.398  80.801  1.00  0.00           H
ATOM   3030  HG2 ARG A 397      17.732  38.756  82.362  1.00  0.00           H
ATOM   3031  CD  ARG A 397      19.248  38.395  80.970  1.00  0.00           C
ATOM   3032  HD1 ARG A 397      19.673  37.715  81.739  1.00  0.00           H
ATOM   3033  HD2 ARG A 397      19.410  38.101  79.910  1.00  0.00           H
ATOM   3034  NE  ARG A 397      19.889  39.750  81.085  1.00  0.00           N
ATOM   3035  HE  ARG A 397      19.383  40.564  81.369  1.00  0.00           H
ATOM   3036  CZ  ARG A 397      21.160  40.020  80.877  1.00  0.00           C
ATOM   3037  NH1 ARG A 397      22.059  39.042  80.672  1.00  0.00           N
ATOM   3038 1HH1 ARG A 397      21.676  38.128  80.811  1.00  0.00           H
ATOM   3039 2HH1 ARG A 397      22.916  39.222  80.190  1.00  0.00           H
ATOM   3040  NH2 ARG A 397      21.528  41.247  80.873  1.00  0.00           N
ATOM   3041 1HH2 ARG A 397      20.811  41.828  81.256  1.00  0.00           H
ATOM   3042 2HH2 ARG A 397      22.476  41.510  81.053  1.00  0.00           H
ATOM   3043  C   ARG A 397      16.078  35.359  79.546  1.00  0.00           C
ATOM   3044  O   ARG A 397      16.325  34.466  80.305  1.00  0.00           O
ATOM   3045  N   GLY A 398      15.073  35.171  78.575  1.00  0.00           N
ATOM   3046  HN  GLY A 398      14.890  35.969  78.005  1.00  0.00           H
ATOM   3047  CA  GLY A 398      14.633  33.905  78.122  1.00  0.00           C
ATOM   3048  HA1 GLY A 398      14.356  33.276  78.955  1.00  0.00           H
ATOM   3049  HA2 GLY A 398      13.804  34.019  77.440  1.00  0.00           H
ATOM   3050  C   GLY A 398      15.732  33.176  77.355  1.00  0.00           C
ATOM   3051  O   GLY A 398      16.838  33.723  77.225  1.00  0.00           O
ATOM   3052  N   GLY A 399      15.463  31.910  76.882  1.00  0.00           N
ATOM   3053  HN  GLY A 399      14.505  31.674  77.020  1.00  0.00           H
ATOM   3054  CA  GLY A 399      16.344  30.952  76.362  1.00  0.00           C
ATOM   3055  HA1 GLY A 399      15.772  30.126  75.967  1.00  0.00           H
ATOM   3056  HA2 GLY A 399      16.850  31.449  75.548  1.00  0.00           H
ATOM   3057  C   GLY A 399      17.200  30.253  77.402  1.00  0.00           C
ATOM   3058  O   GLY A 399      17.383  30.702  78.561  1.00  0.00           O
ATOM   3059  N   ASP A 400      17.785  29.083  76.958  1.00  0.00           N
ATOM   3060  HN  ASP A 400      17.740  28.746  76.021  1.00  0.00           H
ATOM   3061  CA  ASP A 400      18.498  28.320  77.965  1.00  0.00           C
ATOM   3062  HA  ASP A 400      18.016  28.461  78.921  1.00  0.00           H
ATOM   3063  CB  ASP A 400      18.191  26.790  77.631  1.00  0.00           C
ATOM   3064  HB1 ASP A 400      17.224  26.464  78.069  1.00  0.00           H
ATOM   3065  HB2 ASP A 400      18.072  26.658  76.535  1.00  0.00           H
ATOM   3066  CG  ASP A 400      19.121  25.888  78.272  1.00  0.00           C
ATOM   3067  OD1 ASP A 400      19.541  24.846  77.656  1.00  0.00           O
ATOM   3068  OD2 ASP A 400      19.428  26.085  79.471  1.00  0.00           O
ATOM   3069  C   ASP A 400      19.984  28.845  78.125  1.00  0.00           C
ATOM   3070  O   ASP A 400      20.555  29.245  77.075  1.00  0.00           O
ATOM   3071  N   SER A 401      20.617  28.961  79.429  1.00  0.00           N
ATOM   3072  HN  SER A 401      20.284  28.519  80.258  1.00  0.00           H
ATOM   3073  CA  SER A 401      21.902  29.567  79.673  1.00  0.00           C
ATOM   3074  HA  SER A 401      21.721  30.500  79.161  1.00  0.00           H
ATOM   3075  CB  SER A 401      22.157  29.704  81.238  1.00  0.00           C
ATOM   3076  HB1 SER A 401      23.109  30.266  81.346  1.00  0.00           H
ATOM   3077  HB2 SER A 401      21.294  30.238  81.690  1.00  0.00           H
ATOM   3078  OG  SER A 401      22.353  28.432  81.812  1.00  0.00           O
ATOM   3079  HG1 SER A 401      22.363  28.574  82.762  1.00  0.00           H
ATOM   3080  C   SER A 401      22.979  28.872  78.931  1.00  0.00           C
ATOM   3081  O   SER A 401      22.953  27.691  78.744  1.00  0.00           O
ATOM   3082  N   GLY A 402      23.964  29.705  78.468  1.00  0.00           N
ATOM   3083  HN  GLY A 402      23.969  30.679  78.682  1.00  0.00           H
ATOM   3084  CA  GLY A 402      25.047  29.168  77.671  1.00  0.00           C
ATOM   3085  HA1 GLY A 402      25.932  29.780  77.574  1.00  0.00           H
ATOM   3086  HA2 GLY A 402      25.375  28.201  78.022  1.00  0.00           H
ATOM   3087  C   GLY A 402      24.651  28.930  76.233  1.00  0.00           C
ATOM   3088  O   GLY A 402      25.235  28.173  75.483  1.00  0.00           O
ATOM   3089  N   GLY A 403      23.624  29.712  75.816  1.00  0.00           N
ATOM   3090  HN  GLY A 403      23.080  30.292  76.418  1.00  0.00           H
ATOM   3091  CA  GLY A 403      23.476  29.943  74.326  1.00  0.00           C
ATOM   3092  HA1 GLY A 403      22.999  30.850  73.983  1.00  0.00           H
ATOM   3093  HA2 GLY A 403      24.406  29.996  73.779  1.00  0.00           H
ATOM   3094  C   GLY A 403      22.625  28.859  73.799  1.00  0.00           C
ATOM   3095  O   GLY A 403      22.836  28.383  72.687  1.00  0.00           O
ATOM   3096  N   GLY A 404      21.603  28.398  74.512  1.00  0.00           N
ATOM   3097  HN  GLY A 404      21.320  28.871  75.342  1.00  0.00           H
ATOM   3098  CA  GLY A 404      20.706  27.275  74.127  1.00  0.00           C
ATOM   3099  HA1 GLY A 404      21.287  26.581  73.537  1.00  0.00           H
ATOM   3100  HA2 GLY A 404      20.363  26.737  74.998  1.00  0.00           H
ATOM   3101  C   GLY A 404      19.492  27.656  73.261  1.00  0.00           C
ATOM   3102  O   GLY A 404      19.320  28.718  72.618  1.00  0.00           O
ATOM   3103  N   ASP A 405      18.436  26.759  73.327  1.00  0.00           N
ATOM   3104  HN  ASP A 405      18.419  25.967  73.932  1.00  0.00           H
ATOM   3105  CA  ASP A 405      17.223  26.957  72.582  1.00  0.00           C
ATOM   3106  HA  ASP A 405      17.583  27.043  71.567  1.00  0.00           H
ATOM   3107  CB  ASP A 405      16.215  25.691  72.678  1.00  0.00           C
ATOM   3108  HB1 ASP A 405      15.929  25.571  73.745  1.00  0.00           H
ATOM   3109  HB2 ASP A 405      15.209  25.832  72.228  1.00  0.00           H
ATOM   3110  CG  ASP A 405      16.813  24.393  72.140  1.00  0.00           C
ATOM   3111  OD1 ASP A 405      17.550  24.395  71.117  1.00  0.00           O
ATOM   3112  OD2 ASP A 405      16.268  23.297  72.482  1.00  0.00           O
ATOM   3113  C   ASP A 405      16.514  28.248  72.966  1.00  0.00           C
ATOM   3114  O   ASP A 405      16.630  28.781  74.064  1.00  0.00           O
ATOM   3115  N   ARG A 406      15.869  28.871  71.978  1.00  0.00           N
ATOM   3116  HN  ARG A 406      15.687  28.427  71.103  1.00  0.00           H
ATOM   3117  CA  ARG A 406      14.883  29.988  72.165  1.00  0.00           C
ATOM   3118  HA  ARG A 406      15.553  30.745  72.545  1.00  0.00           H
ATOM   3119  CB  ARG A 406      14.148  30.482  70.872  1.00  0.00           C
ATOM   3120  HB1 ARG A 406      13.566  29.651  70.419  1.00  0.00           H
ATOM   3121  HB2 ARG A 406      13.376  31.259  71.054  1.00  0.00           H
ATOM   3122  CG  ARG A 406      15.075  31.018  69.817  1.00  0.00           C
ATOM   3123  HG1 ARG A 406      15.815  30.300  69.403  1.00  0.00           H
ATOM   3124  HG2 ARG A 406      14.390  31.186  68.958  1.00  0.00           H
ATOM   3125  CD  ARG A 406      15.790  32.309  70.253  1.00  0.00           C
ATOM   3126  HD1 ARG A 406      15.135  33.067  70.733  1.00  0.00           H
ATOM   3127  HD2 ARG A 406      16.564  31.982  70.980  1.00  0.00           H
ATOM   3128  NE  ARG A 406      16.566  32.781  69.064  1.00  0.00           N
ATOM   3129  HE  ARG A 406      16.733  32.056  68.396  1.00  0.00           H
ATOM   3130  CZ  ARG A 406      16.865  34.067  68.778  1.00  0.00           C
ATOM   3131  NH1 ARG A 406      16.810  34.959  69.696  1.00  0.00           N
ATOM   3132 1HH1 ARG A 406      16.339  34.703  70.540  1.00  0.00           H
ATOM   3133 2HH1 ARG A 406      16.944  35.943  69.578  1.00  0.00           H
ATOM   3134  NH2 ARG A 406      17.169  34.340  67.533  1.00  0.00           N
ATOM   3135 1HH2 ARG A 406      17.280  33.559  66.919  1.00  0.00           H
ATOM   3136 2HH2 ARG A 406      17.610  35.213  67.326  1.00  0.00           H
ATOM   3137  C   ARG A 406      13.824  29.902  73.284  1.00  0.00           C
ATOM   3138  O   ARG A 406      13.152  28.896  73.472  1.00  0.00           O
ATOM   3139  N   GLY A 407      13.631  31.001  74.036  1.00  0.00           N
ATOM   3140  HN  GLY A 407      14.182  31.819  73.889  1.00  0.00           H
ATOM   3141  CA  GLY A 407      12.403  31.072  74.831  1.00  0.00           C
ATOM   3142  HA1 GLY A 407      12.362  32.095  75.175  1.00  0.00           H
ATOM   3143  HA2 GLY A 407      11.587  30.823  74.170  1.00  0.00           H
ATOM   3144  C   GLY A 407      12.276  30.227  76.106  1.00  0.00           C
ATOM   3145  O   GLY A 407      13.141  29.414  76.381  1.00  0.00           O
ATOM   3146  N   GLY A 408      11.274  30.425  76.984  1.00  0.00           N
ATOM   3147  HN  GLY A 408      10.484  30.999  76.784  1.00  0.00           H
ATOM   3148  CA  GLY A 408      11.252  29.795  78.324  1.00  0.00           C
ATOM   3149  HA1 GLY A 408      10.234  29.958  78.645  1.00  0.00           H
ATOM   3150  HA2 GLY A 408      11.571  28.764  78.277  1.00  0.00           H
ATOM   3151  C   GLY A 408      12.090  30.517  79.291  1.00  0.00           C
ATOM   3152  O   GLY A 408      13.201  30.842  78.932  1.00  0.00           O
ATOM   3153  N   GLY A 409      11.663  30.651  80.565  1.00  0.00           N
ATOM   3154  HN  GLY A 409      10.766  30.291  80.810  1.00  0.00           H
ATOM   3155  CA  GLY A 409      12.325  31.422  81.649  1.00  0.00           C
ATOM   3156  HA1 GLY A 409      11.753  31.262  82.551  1.00  0.00           H
ATOM   3157  HA2 GLY A 409      13.345  31.069  81.679  1.00  0.00           H
ATOM   3158  C   GLY A 409      12.588  32.820  81.489  1.00  0.00           C
ATOM   3159  O   GLY A 409      11.727  33.558  81.063  1.00  0.00           O
ATOM   3160  N   GLY A 410      13.744  33.301  81.973  1.00  0.00           N
ATOM   3161  HN  GLY A 410      14.536  32.706  82.090  1.00  0.00           H
ATOM   3162  CA  GLY A 410      13.950  34.712  82.265  1.00  0.00           C
ATOM   3163  HA1 GLY A 410      14.976  35.027  82.143  1.00  0.00           H
ATOM   3164  HA2 GLY A 410      13.446  35.349  81.553  1.00  0.00           H
ATOM   3165  C   GLY A 410      13.637  35.170  83.566  1.00  0.00           C
ATOM   3166  O   GLY A 410      13.317  36.359  83.687  1.00  0.00           O
ATOM   3167  N   GLY A 411      13.786  34.306  84.607  1.00  0.00           N
ATOM   3168  HN  GLY A 411      14.087  33.357  84.547  1.00  0.00           H
ATOM   3169  CA  GLY A 411      13.322  34.767  85.928  1.00  0.00           C
ATOM   3170  HA1 GLY A 411      12.348  35.217  85.801  1.00  0.00           H
ATOM   3171  HA2 GLY A 411      13.426  33.952  86.630  1.00  0.00           H
ATOM   3172  C   GLY A 411      14.227  35.842  86.517  1.00  0.00           C
ATOM   3173  O   GLY A 411      15.389  36.054  86.182  1.00  0.00           O
ATOM   3174  N   ARG A 412      13.655  36.524  87.536  1.00  0.00           N
ATOM   3175  HN  ARG A 412      12.713  36.335  87.806  1.00  0.00           H
ATOM   3176  CA  ARG A 412      14.345  37.590  88.217  1.00  0.00           C
ATOM   3177  HA  ARG A 412      15.328  37.186  88.412  1.00  0.00           H
ATOM   3178  CB  ARG A 412      14.372  38.949  87.331  1.00  0.00           C
ATOM   3179  HB1 ARG A 412      14.939  39.759  87.839  1.00  0.00           H
ATOM   3180  HB2 ARG A 412      14.928  38.705  86.400  1.00  0.00           H
ATOM   3181  CG  ARG A 412      13.000  39.358  86.868  1.00  0.00           C
ATOM   3182  HG1 ARG A 412      12.392  38.510  86.486  1.00  0.00           H
ATOM   3183  HG2 ARG A 412      12.480  39.843  87.721  1.00  0.00           H
ATOM   3184  CD  ARG A 412      13.081  40.498  85.835  1.00  0.00           C
ATOM   3185  HD1 ARG A 412      13.624  41.415  86.150  1.00  0.00           H
ATOM   3186  HD2 ARG A 412      13.643  40.151  84.943  1.00  0.00           H
ATOM   3187  NE  ARG A 412      11.679  40.815  85.522  1.00  0.00           N
ATOM   3188  HE  ARG A 412      11.232  40.412  84.723  1.00  0.00           H
ATOM   3189  CZ  ARG A 412      10.999  41.865  85.995  1.00  0.00           C
ATOM   3190  NH1 ARG A 412      11.454  42.628  86.932  1.00  0.00           N
ATOM   3191 1HH1 ARG A 412      12.425  42.645  87.169  1.00  0.00           H
ATOM   3192 2HH1 ARG A 412      10.962  43.487  87.074  1.00  0.00           H
ATOM   3193  NH2 ARG A 412       9.748  42.017  85.717  1.00  0.00           N
ATOM   3194 1HH2 ARG A 412       9.197  41.258  85.370  1.00  0.00           H
ATOM   3195 2HH2 ARG A 412       9.294  42.755  86.216  1.00  0.00           H
ATOM   3196  C   ARG A 412      13.599  37.773  89.510  1.00  0.00           C
ATOM   3197  O   ARG A 412      12.463  37.473  89.627  1.00  0.00           O
ATOM   3198  N   VAL A 413      14.210  38.522  90.435  1.00  0.00           N
ATOM   3199  HN  VAL A 413      15.184  38.729  90.387  1.00  0.00           H
ATOM   3200  CA  VAL A 413      13.463  39.243  91.493  1.00  0.00           C
ATOM   3201  HA  VAL A 413      12.422  39.099  91.242  1.00  0.00           H
ATOM   3202  CB  VAL A 413      13.610  38.719  92.899  1.00  0.00           C
ATOM   3203  HB  VAL A 413      13.011  39.238  93.677  1.00  0.00           H
ATOM   3204  CG1 VAL A 413      13.153  37.298  92.946  1.00  0.00           C
ATOM   3205 1HG1 VAL A 413      13.958  36.617  92.593  1.00  0.00           H
ATOM   3206 2HG1 VAL A 413      12.900  36.865  93.937  1.00  0.00           H
ATOM   3207 3HG1 VAL A 413      12.285  37.185  92.262  1.00  0.00           H
ATOM   3208  CG2 VAL A 413      15.044  38.915  93.532  1.00  0.00           C
ATOM   3209 1HG2 VAL A 413      15.655  38.307  92.832  1.00  0.00           H
ATOM   3210 2HG2 VAL A 413      15.354  39.979  93.617  1.00  0.00           H
ATOM   3211 3HG2 VAL A 413      14.994  38.613  94.600  1.00  0.00           H
ATOM   3212  C   VAL A 413      13.702  40.764  91.530  1.00  0.00           C
ATOM   3213  O   VAL A 413      12.842  41.565  91.975  1.00  0.00           O
ATOM   3214  N   ALA A 414      14.865  41.205  90.959  1.00  0.00           N
ATOM   3215  HN  ALA A 414      15.539  40.577  90.578  1.00  0.00           H
ATOM   3216  CA  ALA A 414      14.960  42.663  90.792  1.00  0.00           C
ATOM   3217  HA  ALA A 414      14.798  42.942  91.823  1.00  0.00           H
ATOM   3218  CB  ALA A 414      16.288  43.002  90.244  1.00  0.00           C
ATOM   3219  HB1 ALA A 414      17.049  42.547  90.913  1.00  0.00           H
ATOM   3220  HB2 ALA A 414      16.445  42.626  89.210  1.00  0.00           H
ATOM   3221  HB3 ALA A 414      16.535  44.084  90.183  1.00  0.00           H
ATOM   3222  C   ALA A 414      13.849  43.349  89.966  1.00  0.00           C
ATOM   3223  O   ALA A 414      13.747  43.216  88.767  1.00  0.00           O
ATOM   3224  N   LEU A 415      13.138  44.280  90.555  1.00  0.00           N
ATOM   3225  HN  LEU A 415      13.130  44.473  91.533  1.00  0.00           H
ATOM   3226  CA  LEU A 415      12.213  45.117  89.815  1.00  0.00           C
ATOM   3227  HA  LEU A 415      11.754  44.413  89.138  1.00  0.00           H
ATOM   3228  CB  LEU A 415      11.280  45.820  90.772  1.00  0.00           C
ATOM   3229  HB1 LEU A 415      11.763  46.659  91.318  1.00  0.00           H
ATOM   3230  HB2 LEU A 415      10.451  46.312  90.221  1.00  0.00           H
ATOM   3231  CG  LEU A 415      10.678  44.921  91.928  1.00  0.00           C
ATOM   3232  HG  LEU A 415      11.514  44.560  92.564  1.00  0.00           H
ATOM   3233  CD1 LEU A 415       9.815  45.811  92.840  1.00  0.00           C
ATOM   3234 1HD1 LEU A 415       9.395  45.220  93.682  1.00  0.00           H
ATOM   3235 2HD1 LEU A 415      10.310  46.739  93.198  1.00  0.00           H
ATOM   3236 3HD1 LEU A 415       8.995  46.154  92.173  1.00  0.00           H
ATOM   3237  CD2 LEU A 415       9.811  43.651  91.573  1.00  0.00           C
ATOM   3238 1HD2 LEU A 415      10.558  42.966  91.118  1.00  0.00           H
ATOM   3239 2HD2 LEU A 415       9.400  43.154  92.477  1.00  0.00           H
ATOM   3240 3HD2 LEU A 415       8.997  43.814  90.834  1.00  0.00           H
ATOM   3241  C   LEU A 415      13.014  46.150  88.983  1.00  0.00           C
ATOM   3242  O   LEU A 415      14.115  46.534  89.354  1.00  0.00           O
ATOM   3243  N   THR A 416      12.548  46.419  87.729  1.00  0.00           N
ATOM   3244  HN  THR A 416      11.713  45.956  87.442  1.00  0.00           H
ATOM   3245  CA  THR A 416      13.465  47.069  86.808  1.00  0.00           C
ATOM   3246  HA  THR A 416      14.452  46.659  86.967  1.00  0.00           H
ATOM   3247  CB  THR A 416      12.975  46.811  85.378  1.00  0.00           C
ATOM   3248  HB  THR A 416      12.038  47.366  85.156  1.00  0.00           H
ATOM   3249  OG1 THR A 416      12.556  45.446  85.295  1.00  0.00           O
ATOM   3250  HG1 THR A 416      11.740  45.307  85.781  1.00  0.00           H
ATOM   3251  CG2 THR A 416      14.112  47.230  84.390  1.00  0.00           C
ATOM   3252 1HG2 THR A 416      14.231  48.335  84.364  1.00  0.00           H
ATOM   3253 2HG2 THR A 416      15.058  46.736  84.700  1.00  0.00           H
ATOM   3254 3HG2 THR A 416      13.936  46.959  83.327  1.00  0.00           H
ATOM   3255  C   THR A 416      13.524  48.483  87.070  1.00  0.00           C
ATOM   3256  O   THR A 416      12.610  49.223  86.687  1.00  0.00           O
ATOM   3257  N   ALA A 417      14.604  48.905  87.657  1.00  0.00           N
ATOM   3258  HN  ALA A 417      15.228  48.343  88.194  1.00  0.00           H
ATOM   3259  CA  ALA A 417      15.039  50.290  87.726  1.00  0.00           C
ATOM   3260  HA  ALA A 417      14.238  50.858  88.178  1.00  0.00           H
ATOM   3261  CB  ALA A 417      16.229  50.422  88.679  1.00  0.00           C
ATOM   3262  HB1 ALA A 417      17.213  50.123  88.260  1.00  0.00           H
ATOM   3263  HB2 ALA A 417      16.287  51.465  89.059  1.00  0.00           H
ATOM   3264  HB3 ALA A 417      16.050  49.880  89.632  1.00  0.00           H
ATOM   3265  C   ALA A 417      15.435  50.868  86.279  1.00  0.00           C
ATOM   3266  O   ALA A 417      16.032  50.156  85.509  1.00  0.00           O
ATOM   3267  N   PRO A 418      15.235  52.160  85.974  1.00  0.00           N
ATOM   3268  CD  PRO A 418      14.567  53.116  86.867  1.00  0.00           C
ATOM   3269  HD1 PRO A 418      15.419  53.339  87.545  1.00  0.00           H
ATOM   3270  HD2 PRO A 418      13.729  52.664  87.440  1.00  0.00           H
ATOM   3271  CA  PRO A 418      15.761  52.782  84.856  1.00  0.00           C
ATOM   3272  HA  PRO A 418      15.362  52.391  83.932  1.00  0.00           H
ATOM   3273  CB  PRO A 418      15.440  54.332  85.031  1.00  0.00           C
ATOM   3274  HB1 PRO A 418      16.304  54.830  85.522  1.00  0.00           H
ATOM   3275  HB2 PRO A 418      15.175  54.636  83.996  1.00  0.00           H
ATOM   3276  CG  PRO A 418      14.261  54.323  86.048  1.00  0.00           C
ATOM   3277  HG1 PRO A 418      14.118  55.303  86.552  1.00  0.00           H
ATOM   3278  HG2 PRO A 418      13.322  54.241  85.460  1.00  0.00           H
ATOM   3279  C   PRO A 418      17.204  52.597  84.553  1.00  0.00           C
ATOM   3280  O   PRO A 418      17.952  52.493  85.540  1.00  0.00           O
ATOM   3281  N   GLY A 419      17.651  52.670  83.300  1.00  0.00           N
ATOM   3282  HN  GLY A 419      17.068  52.799  82.502  1.00  0.00           H
ATOM   3283  CA  GLY A 419      19.032  52.871  82.966  1.00  0.00           C
ATOM   3284  HA1 GLY A 419      19.742  52.218  83.451  1.00  0.00           H
ATOM   3285  HA2 GLY A 419      18.961  52.780  81.892  1.00  0.00           H
ATOM   3286  C   GLY A 419      19.419  54.298  83.379  1.00  0.00           C
ATOM   3287  O   GLY A 419      18.631  55.227  83.196  1.00  0.00           O
ATOM   3288  N   ALA A 420      20.741  54.473  83.690  1.00  0.00           N
ATOM   3289  HN  ALA A 420      21.428  53.755  83.772  1.00  0.00           H
ATOM   3290  CA  ALA A 420      21.227  55.842  83.944  1.00  0.00           C
ATOM   3291  HA  ALA A 420      20.411  56.500  84.205  1.00  0.00           H
ATOM   3292  CB  ALA A 420      22.431  55.753  84.931  1.00  0.00           C
ATOM   3293  HB1 ALA A 420      23.271  55.165  84.505  1.00  0.00           H
ATOM   3294  HB2 ALA A 420      22.681  56.781  85.269  1.00  0.00           H
ATOM   3295  HB3 ALA A 420      22.035  55.183  85.798  1.00  0.00           H
ATOM   3296  C   ALA A 420      21.720  56.501  82.658  1.00  0.00           C
ATOM   3297  O   ALA A 420      21.598  57.741  82.505  1.00  0.00           O
ATOM   3298  N   ALA A 421      22.209  55.663  81.665  1.00  0.00           N
ATOM   3299  HN  ALA A 421      22.079  54.702  81.897  1.00  0.00           H
ATOM   3300  CA  ALA A 421      22.682  56.197  80.394  1.00  0.00           C
ATOM   3301  HA  ALA A 421      23.296  57.023  80.720  1.00  0.00           H
ATOM   3302  CB  ALA A 421      23.566  55.187  79.696  1.00  0.00           C
ATOM   3303  HB1 ALA A 421      24.362  54.834  80.385  1.00  0.00           H
ATOM   3304  HB2 ALA A 421      22.993  54.275  79.426  1.00  0.00           H
ATOM   3305  HB3 ALA A 421      23.997  55.471  78.712  1.00  0.00           H
ATOM   3306  C   ALA A 421      21.550  56.708  79.562  1.00  0.00           C
ATOM   3307  O   ALA A 421      20.523  56.038  79.462  1.00  0.00           O
ATOM   3308  N   ASP A 422      21.743  57.818  78.862  1.00  0.00           N
ATOM   3309  HN  ASP A 422      22.646  58.239  78.860  1.00  0.00           H
ATOM   3310  CA  ASP A 422      20.791  58.457  77.928  1.00  0.00           C
ATOM   3311  HA  ASP A 422      19.836  58.275  78.400  1.00  0.00           H
ATOM   3312  CB  ASP A 422      21.098  59.989  77.881  1.00  0.00           C
ATOM   3313  HB1 ASP A 422      22.181  59.997  77.632  1.00  0.00           H
ATOM   3314  HB2 ASP A 422      20.562  60.438  77.017  1.00  0.00           H
ATOM   3315  CG  ASP A 422      20.715  60.718  79.138  1.00  0.00           C
ATOM   3316  OD1 ASP A 422      21.179  61.871  79.313  1.00  0.00           O
ATOM   3317  OD2 ASP A 422      19.827  60.278  79.920  1.00  0.00           O
ATOM   3318  C   ASP A 422      20.666  57.869  76.554  1.00  0.00           C
ATOM   3319  O   ASP A 422      19.924  58.350  75.691  1.00  0.00           O
ATOM   3320  N   ALA A 423      21.175  56.647  76.371  1.00  0.00           N
ATOM   3321  HN  ALA A 423      21.539  56.100  77.121  1.00  0.00           H
ATOM   3322  CA  ALA A 423      21.310  56.090  75.031  1.00  0.00           C
ATOM   3323  HA  ALA A 423      20.401  56.332  74.498  1.00  0.00           H
ATOM   3324  CB  ALA A 423      22.485  56.693  74.175  1.00  0.00           C
ATOM   3325  HB1 ALA A 423      22.491  56.459  73.089  1.00  0.00           H
ATOM   3326  HB2 ALA A 423      22.337  57.788  74.296  1.00  0.00           H
ATOM   3327  HB3 ALA A 423      23.506  56.598  74.601  1.00  0.00           H
ATOM   3328  C   ALA A 423      21.451  54.545  75.076  1.00  0.00           C
ATOM   3329  O   ALA A 423      22.129  54.015  75.933  1.00  0.00           O
ATOM   3330  N   PRO A 424      20.905  53.756  74.129  1.00  0.00           N
ATOM   3331  CD  PRO A 424      19.792  54.130  73.255  1.00  0.00           C
ATOM   3332  HD1 PRO A 424      20.136  54.942  72.580  1.00  0.00           H
ATOM   3333  HD2 PRO A 424      18.920  54.448  73.866  1.00  0.00           H
ATOM   3334  CA  PRO A 424      21.441  52.434  73.903  1.00  0.00           C
ATOM   3335  HA  PRO A 424      21.220  51.830  74.771  1.00  0.00           H
ATOM   3336  CB  PRO A 424      20.607  51.934  72.715  1.00  0.00           C
ATOM   3337  HB1 PRO A 424      21.160  51.886  71.753  1.00  0.00           H
ATOM   3338  HB2 PRO A 424      20.255  50.915  72.984  1.00  0.00           H
ATOM   3339  CG  PRO A 424      19.458  52.947  72.493  1.00  0.00           C
ATOM   3340  HG1 PRO A 424      19.391  53.052  71.389  1.00  0.00           H
ATOM   3341  HG2 PRO A 424      18.488  52.521  72.827  1.00  0.00           H
ATOM   3342  C   PRO A 424      22.925  52.146  73.864  1.00  0.00           C
ATOM   3343  O   PRO A 424      23.711  53.045  73.527  1.00  0.00           O
ATOM   3344  N   GLY A 425      23.338  50.891  74.278  1.00  0.00           N
ATOM   3345  HN  GLY A 425      22.619  50.207  74.372  1.00  0.00           H
ATOM   3346  CA  GLY A 425      24.695  50.459  74.642  1.00  0.00           C
ATOM   3347  HA1 GLY A 425      24.896  50.816  75.641  1.00  0.00           H
ATOM   3348  HA2 GLY A 425      24.568  49.386  74.624  1.00  0.00           H
ATOM   3349  C   GLY A 425      25.747  50.997  73.811  1.00  0.00           C
ATOM   3350  O   GLY A 425      26.723  51.547  74.336  1.00  0.00           O
ATOM   3351  N   ALA A 426      25.630  50.934  72.539  1.00  0.00           N
ATOM   3352  HN  ALA A 426      24.712  50.609  72.325  1.00  0.00           H
ATOM   3353  CA  ALA A 426      26.439  51.425  71.470  1.00  0.00           C
ATOM   3354  HA  ALA A 426      27.371  50.880  71.443  1.00  0.00           H
ATOM   3355  CB  ALA A 426      25.735  51.173  70.101  1.00  0.00           C
ATOM   3356  HB1 ALA A 426      25.708  50.082  69.892  1.00  0.00           H
ATOM   3357  HB2 ALA A 426      24.689  51.508  70.272  1.00  0.00           H
ATOM   3358  HB3 ALA A 426      26.198  51.707  69.244  1.00  0.00           H
ATOM   3359  C   ALA A 426      26.891  52.898  71.592  1.00  0.00           C
ATOM   3360  O   ALA A 426      27.993  53.183  71.149  1.00  0.00           O
ATOM   3361  N   GLY A 427      25.957  53.818  71.978  1.00  0.00           N
ATOM   3362  HN  GLY A 427      25.020  53.480  72.033  1.00  0.00           H
ATOM   3363  CA  GLY A 427      26.103  55.257  72.041  1.00  0.00           C
ATOM   3364  HA1 GLY A 427      26.957  55.421  71.401  1.00  0.00           H
ATOM   3365  HA2 GLY A 427      25.125  55.644  71.793  1.00  0.00           H
ATOM   3366  C   GLY A 427      26.478  55.535  73.507  1.00  0.00           C
ATOM   3367  O   GLY A 427      27.208  56.439  73.757  1.00  0.00           O
ATOM   3368  N   ALA A 428      26.037  54.714  74.462  1.00  0.00           N
ATOM   3369  HN  ALA A 428      25.456  53.915  74.331  1.00  0.00           H
ATOM   3370  CA  ALA A 428      26.492  54.858  75.842  1.00  0.00           C
ATOM   3371  HA  ALA A 428      26.332  55.860  76.211  1.00  0.00           H
ATOM   3372  CB  ALA A 428      25.599  53.827  76.594  1.00  0.00           C
ATOM   3373  HB1 ALA A 428      25.843  53.657  77.664  1.00  0.00           H
ATOM   3374  HB2 ALA A 428      24.533  54.111  76.459  1.00  0.00           H
ATOM   3375  HB3 ALA A 428      25.729  52.826  76.129  1.00  0.00           H
ATOM   3376  C   ALA A 428      27.981  54.761  76.074  1.00  0.00           C
ATOM   3377  O   ALA A 428      28.539  55.681  76.717  1.00  0.00           O
ATOM   3378  N   THR A 429      28.652  53.684  75.539  1.00  0.00           N
ATOM   3379  HN  THR A 429      28.038  52.985  75.182  1.00  0.00           H
ATOM   3380  CA  THR A 429      30.151  53.618  75.417  1.00  0.00           C
ATOM   3381  HA  THR A 429      30.516  53.531  76.430  1.00  0.00           H
ATOM   3382  CB  THR A 429      30.680  52.270  74.845  1.00  0.00           C
ATOM   3383  HB  THR A 429      30.485  51.481  75.601  1.00  0.00           H
ATOM   3384  OG1 THR A 429      32.058  52.240  74.572  1.00  0.00           O
ATOM   3385  HG1 THR A 429      32.508  52.218  75.420  1.00  0.00           H
ATOM   3386  CG2 THR A 429      29.992  52.052  73.466  1.00  0.00           C
ATOM   3387 1HG2 THR A 429      30.393  52.836  72.789  1.00  0.00           H
ATOM   3388 2HG2 THR A 429      30.189  51.030  73.077  1.00  0.00           H
ATOM   3389 3HG2 THR A 429      28.893  52.110  73.616  1.00  0.00           H
ATOM   3390  C   THR A 429      30.725  54.880  74.670  1.00  0.00           C
ATOM   3391  O   THR A 429      30.094  55.298  73.747  1.00  0.00           O
ATOM   3392  N   ALA A 430      31.900  55.382  75.153  1.00  0.00           N
ATOM   3393  HN  ALA A 430      32.411  54.984  75.911  1.00  0.00           H
ATOM   3394  CA  ALA A 430      32.313  56.697  74.766  1.00  0.00           C
ATOM   3395  HA  ALA A 430      31.503  57.385  74.961  1.00  0.00           H
ATOM   3396  CB  ALA A 430      33.480  57.215  75.634  1.00  0.00           C
ATOM   3397  HB1 ALA A 430      33.359  57.000  76.717  1.00  0.00           H
ATOM   3398  HB2 ALA A 430      34.476  56.747  75.481  1.00  0.00           H
ATOM   3399  HB3 ALA A 430      33.523  58.309  75.451  1.00  0.00           H
ATOM   3400  C   ALA A 430      32.691  56.826  73.269  1.00  0.00           C
ATOM   3401  O   ALA A 430      33.174  55.838  72.686  1.00  0.00           O
ATOM   3402  N   GLY A 431      32.593  58.008  72.644  1.00  0.00           N
ATOM   3403  HN  GLY A 431      32.277  58.867  73.041  1.00  0.00           H
ATOM   3404  CA  GLY A 431      32.899  58.087  71.210  1.00  0.00           C
ATOM   3405  HA1 GLY A 431      32.288  57.470  70.568  1.00  0.00           H
ATOM   3406  HA2 GLY A 431      32.760  59.150  71.085  1.00  0.00           H
ATOM   3407  C   GLY A 431      34.322  57.903  70.879  1.00  0.00           C
ATOM   3408  O   GLY A 431      34.681  57.395  69.870  1.00  0.00           O
ATOM   3409  N   ILE A 432      35.244  58.303  71.752  1.00  0.00           N
ATOM   3410  HN  ILE A 432      34.934  58.822  72.545  1.00  0.00           H
ATOM   3411  CA  ILE A 432      36.685  58.137  71.522  1.00  0.00           C
ATOM   3412  HA  ILE A 432      36.882  58.587  70.561  1.00  0.00           H
ATOM   3413  CB  ILE A 432      37.418  58.909  72.583  1.00  0.00           C
ATOM   3414  HB  ILE A 432      36.975  59.923  72.679  1.00  0.00           H
ATOM   3415  CG2 ILE A 432      37.091  58.363  74.041  1.00  0.00           C
ATOM   3416 1HG2 ILE A 432      37.550  57.352  74.073  1.00  0.00           H
ATOM   3417 2HG2 ILE A 432      37.554  58.906  74.892  1.00  0.00           H
ATOM   3418 3HG2 ILE A 432      36.003  58.215  74.213  1.00  0.00           H
ATOM   3419  CG1 ILE A 432      38.941  59.046  72.348  1.00  0.00           C
ATOM   3420 1HG1 ILE A 432      39.492  59.571  73.158  1.00  0.00           H
ATOM   3421 2HG1 ILE A 432      39.402  58.036  72.307  1.00  0.00           H
ATOM   3422  CD  ILE A 432      39.258  59.793  71.035  1.00  0.00           C
ATOM   3423  HD1 ILE A 432      40.322  60.096  70.935  1.00  0.00           H
ATOM   3424  HD2 ILE A 432      39.099  59.176  70.125  1.00  0.00           H
ATOM   3425  HD3 ILE A 432      38.659  60.725  70.948  1.00  0.00           H
ATOM   3426  C   ILE A 432      37.176  56.639  71.539  1.00  0.00           C
ATOM   3427  O   ILE A 432      38.126  56.313  70.830  1.00  0.00           O
ATOM   3428  N   HSE A 433      36.464  55.688  72.224  1.00  0.00           N
ATOM   3429  HN  HSE A 433      35.590  55.868  72.668  1.00  0.00           H
ATOM   3430  CA  HSE A 433      36.864  54.318  72.314  1.00  0.00           C
ATOM   3431  HA  HSE A 433      37.936  54.272  72.442  1.00  0.00           H
ATOM   3432  CB  HSE A 433      36.279  53.573  73.507  1.00  0.00           C
ATOM   3433  HB1 HSE A 433      35.172  53.663  73.493  1.00  0.00           H
ATOM   3434  HB2 HSE A 433      36.494  52.483  73.525  1.00  0.00           H
ATOM   3435  ND1 HSE A 433      38.092  53.764  75.199  1.00  0.00           N
ATOM   3436  CG  HSE A 433      36.786  54.092  74.839  1.00  0.00           C
ATOM   3437  CE1 HSE A 433      38.225  54.145  76.447  1.00  0.00           C
ATOM   3438  HE1 HSE A 433      39.188  54.168  76.956  1.00  0.00           H
ATOM   3439  NE2 HSE A 433      37.140  54.810  76.862  1.00  0.00           N
ATOM   3440  HE2 HSE A 433      37.013  55.274  77.739  1.00  0.00           H
ATOM   3441  CD2 HSE A 433      36.169  54.741  75.859  1.00  0.00           C
ATOM   3442  HD2 HSE A 433      35.127  55.019  75.961  1.00  0.00           H
ATOM   3443  C   HSE A 433      36.381  53.607  71.053  1.00  0.00           C
ATOM   3444  O   HSE A 433      35.318  54.010  70.522  1.00  0.00           O
ATOM   3445  N   TRP A 434      37.032  52.462  70.608  1.00  0.00           N
ATOM   3446  HN  TRP A 434      37.830  52.148  71.116  1.00  0.00           H
ATOM   3447  CA  TRP A 434      36.590  51.726  69.440  1.00  0.00           C
ATOM   3448  HA  TRP A 434      36.060  52.389  68.773  1.00  0.00           H
ATOM   3449  CB  TRP A 434      37.838  51.201  68.661  1.00  0.00           C
ATOM   3450  HB1 TRP A 434      38.573  52.018  68.498  1.00  0.00           H
ATOM   3451  HB2 TRP A 434      38.360  50.534  69.379  1.00  0.00           H
ATOM   3452  CG  TRP A 434      37.658  50.609  67.293  1.00  0.00           C
ATOM   3453  CD1 TRP A 434      37.923  49.286  66.893  1.00  0.00           C
ATOM   3454  HD1 TRP A 434      38.065  48.451  67.564  1.00  0.00           H
ATOM   3455  NE1 TRP A 434      38.144  49.232  65.519  1.00  0.00           N
ATOM   3456  HE1 TRP A 434      38.004  48.459  64.940  1.00  0.00           H
ATOM   3457  CE2 TRP A 434      38.006  50.487  64.990  1.00  0.00           C
ATOM   3458  CD2 TRP A 434      37.683  51.386  66.084  1.00  0.00           C
ATOM   3459  CE3 TRP A 434      37.415  52.737  65.806  1.00  0.00           C
ATOM   3460  HE3 TRP A 434      37.351  53.531  66.535  1.00  0.00           H
ATOM   3461  CZ3 TRP A 434      37.568  53.222  64.444  1.00  0.00           C
ATOM   3462  HZ3 TRP A 434      37.363  54.260  64.226  1.00  0.00           H
ATOM   3463  CZ2 TRP A 434      38.044  50.919  63.677  1.00  0.00           C
ATOM   3464  HZ2 TRP A 434      38.129  50.231  62.849  1.00  0.00           H
ATOM   3465  CH2 TRP A 434      37.875  52.248  63.433  1.00  0.00           C
ATOM   3466  HH2 TRP A 434      37.954  52.711  62.460  1.00  0.00           H
ATOM   3467  C   TRP A 434      35.571  50.594  69.692  1.00  0.00           C
ATOM   3468  O   TRP A 434      35.175  49.904  68.741  1.00  0.00           O
ATOM   3469  N   TYR A 435      34.965  50.434  70.875  1.00  0.00           N
ATOM   3470  HN  TYR A 435      35.280  51.049  71.593  1.00  0.00           H
ATOM   3471  CA  TYR A 435      33.909  49.477  71.296  1.00  0.00           C
ATOM   3472  HA  TYR A 435      34.258  48.479  71.077  1.00  0.00           H
ATOM   3473  CB  TYR A 435      33.629  49.694  72.825  1.00  0.00           C
ATOM   3474  HB1 TYR A 435      33.369  50.749  73.060  1.00  0.00           H
ATOM   3475  HB2 TYR A 435      32.764  49.090  73.170  1.00  0.00           H
ATOM   3476  CG  TYR A 435      34.802  49.257  73.668  1.00  0.00           C
ATOM   3477  CD1 TYR A 435      35.150  50.156  74.612  1.00  0.00           C
ATOM   3478  HD1 TYR A 435      34.551  51.037  74.789  1.00  0.00           H
ATOM   3479  CE1 TYR A 435      36.347  49.920  75.404  1.00  0.00           C
ATOM   3480  HE1 TYR A 435      36.606  50.631  76.175  1.00  0.00           H
ATOM   3481  CZ  TYR A 435      37.234  48.940  75.031  1.00  0.00           C
ATOM   3482  OH  TYR A 435      38.504  48.850  75.583  1.00  0.00           O
ATOM   3483  HH  TYR A 435      38.834  48.000  75.283  1.00  0.00           H
ATOM   3484  CD2 TYR A 435      35.666  48.197  73.332  1.00  0.00           C
ATOM   3485  HD2 TYR A 435      35.420  47.505  72.540  1.00  0.00           H
ATOM   3486  CE2 TYR A 435      36.886  48.003  74.043  1.00  0.00           C
ATOM   3487  HE2 TYR A 435      37.556  47.252  73.653  1.00  0.00           H
ATOM   3488  C   TYR A 435      32.583  49.696  70.425  1.00  0.00           C
ATOM   3489  O   TYR A 435      31.933  48.730  70.046  1.00  0.00           O
ATOM   3490  N   SER A 436      32.206  50.962  70.037  1.00  0.00           N
ATOM   3491  HN  SER A 436      32.766  51.778  70.157  1.00  0.00           H
ATOM   3492  CA  SER A 436      30.951  51.200  69.272  1.00  0.00           C
ATOM   3493  HA  SER A 436      30.195  50.562  69.705  1.00  0.00           H
ATOM   3494  CB  SER A 436      30.503  52.725  69.256  1.00  0.00           C
ATOM   3495  HB1 SER A 436      30.478  53.018  70.327  1.00  0.00           H
ATOM   3496  HB2 SER A 436      31.319  53.346  68.828  1.00  0.00           H
ATOM   3497  OG  SER A 436      29.291  52.906  68.523  1.00  0.00           O
ATOM   3498  HG1 SER A 436      28.603  52.857  69.191  1.00  0.00           H
ATOM   3499  C   SER A 436      31.114  50.625  67.893  1.00  0.00           C
ATOM   3500  O   SER A 436      30.245  49.847  67.399  1.00  0.00           O
ATOM   3501  N   GLN A 437      32.250  50.845  67.200  1.00  0.00           N
ATOM   3502  HN  GLN A 437      32.926  51.463  67.592  1.00  0.00           H
ATOM   3503  CA  GLN A 437      32.608  50.122  65.974  1.00  0.00           C
ATOM   3504  HA  GLN A 437      31.809  50.323  65.275  1.00  0.00           H
ATOM   3505  CB  GLN A 437      34.001  50.609  65.452  1.00  0.00           C
ATOM   3506  HB1 GLN A 437      33.994  51.719  65.497  1.00  0.00           H
ATOM   3507  HB2 GLN A 437      34.740  50.360  66.244  1.00  0.00           H
ATOM   3508  CG  GLN A 437      34.482  50.025  64.086  1.00  0.00           C
ATOM   3509  HG1 GLN A 437      35.423  50.529  63.778  1.00  0.00           H
ATOM   3510  HG2 GLN A 437      34.637  48.936  64.241  1.00  0.00           H
ATOM   3511  CD  GLN A 437      33.437  50.404  63.001  1.00  0.00           C
ATOM   3512  OE1 GLN A 437      33.598  51.446  62.450  1.00  0.00           O
ATOM   3513  NE2 GLN A 437      32.333  49.600  62.802  1.00  0.00           N
ATOM   3514 1HE2 GLN A 437      32.392  48.762  63.345  1.00  0.00           H
ATOM   3515 2HE2 GLN A 437      31.630  49.677  62.096  1.00  0.00           H
ATOM   3516  C   GLN A 437      32.613  48.519  66.078  1.00  0.00           C
ATOM   3517  O   GLN A 437      32.149  47.801  65.205  1.00  0.00           O
ATOM   3518  N   LEU A 438      33.248  48.009  67.125  1.00  0.00           N
ATOM   3519  HN  LEU A 438      33.668  48.586  67.821  1.00  0.00           H
ATOM   3520  CA  LEU A 438      33.346  46.522  67.314  1.00  0.00           C
ATOM   3521  HA  LEU A 438      33.633  46.040  66.391  1.00  0.00           H
ATOM   3522  CB  LEU A 438      34.208  46.282  68.532  1.00  0.00           C
ATOM   3523  HB1 LEU A 438      33.790  46.906  69.350  1.00  0.00           H
ATOM   3524  HB2 LEU A 438      34.267  45.200  68.780  1.00  0.00           H
ATOM   3525  CG  LEU A 438      35.741  46.505  68.456  1.00  0.00           C
ATOM   3526  HG  LEU A 438      35.952  47.380  67.805  1.00  0.00           H
ATOM   3527  CD1 LEU A 438      36.376  46.889  69.827  1.00  0.00           C
ATOM   3528 1HD1 LEU A 438      36.029  46.374  70.749  1.00  0.00           H
ATOM   3529 2HD1 LEU A 438      37.485  46.886  69.764  1.00  0.00           H
ATOM   3530 3HD1 LEU A 438      36.040  47.936  69.983  1.00  0.00           H
ATOM   3531  CD2 LEU A 438      36.375  45.413  67.644  1.00  0.00           C
ATOM   3532 1HD2 LEU A 438      35.708  44.980  66.867  1.00  0.00           H
ATOM   3533 2HD2 LEU A 438      37.267  45.710  67.053  1.00  0.00           H
ATOM   3534 3HD2 LEU A 438      36.894  44.652  68.265  1.00  0.00           H
ATOM   3535  C   LEU A 438      32.017  45.848  67.513  1.00  0.00           C
ATOM   3536  O   LEU A 438      31.737  44.762  67.085  1.00  0.00           O
ATOM   3537  N   LEU A 439      31.117  46.638  68.090  1.00  0.00           N
ATOM   3538  HN  LEU A 439      31.350  47.518  68.497  1.00  0.00           H
ATOM   3539  CA  LEU A 439      29.762  46.138  68.468  1.00  0.00           C
ATOM   3540  HA  LEU A 439      29.938  45.197  68.968  1.00  0.00           H
ATOM   3541  CB  LEU A 439      29.102  47.216  69.321  1.00  0.00           C
ATOM   3542  HB1 LEU A 439      29.731  47.302  70.233  1.00  0.00           H
ATOM   3543  HB2 LEU A 439      28.978  48.274  69.007  1.00  0.00           H
ATOM   3544  CG  LEU A 439      27.673  46.829  69.880  1.00  0.00           C
ATOM   3545  HG  LEU A 439      26.914  46.939  69.076  1.00  0.00           H
ATOM   3546  CD1 LEU A 439      27.666  45.363  70.359  1.00  0.00           C
ATOM   3547 1HD1 LEU A 439      28.427  45.295  71.165  1.00  0.00           H
ATOM   3548 2HD1 LEU A 439      26.681  45.023  70.744  1.00  0.00           H
ATOM   3549 3HD1 LEU A 439      27.948  44.704  69.510  1.00  0.00           H
ATOM   3550  CD2 LEU A 439      27.345  47.805  71.025  1.00  0.00           C
ATOM   3551 1HD2 LEU A 439      27.282  48.883  70.763  1.00  0.00           H
ATOM   3552 2HD2 LEU A 439      26.383  47.601  71.541  1.00  0.00           H
ATOM   3553 3HD2 LEU A 439      28.181  47.740  71.753  1.00  0.00           H
ATOM   3554  C   LEU A 439      28.942  45.740  67.236  1.00  0.00           C
ATOM   3555  O   LEU A 439      28.340  44.675  67.137  1.00  0.00           O
ATOM   3556  N   TYR A 440      28.944  46.620  66.239  1.00  0.00           N
ATOM   3557  HN  TYR A 440      29.268  47.543  66.432  1.00  0.00           H
ATOM   3558  CA  TYR A 440      28.171  46.320  65.066  1.00  0.00           C
ATOM   3559  HA  TYR A 440      27.210  45.882  65.292  1.00  0.00           H
ATOM   3560  CB  TYR A 440      27.977  47.558  64.145  1.00  0.00           C
ATOM   3561  HB1 TYR A 440      28.908  47.855  63.616  1.00  0.00           H
ATOM   3562  HB2 TYR A 440      27.249  47.173  63.400  1.00  0.00           H
ATOM   3563  CG  TYR A 440      27.321  48.716  64.785  1.00  0.00           C
ATOM   3564  CD1 TYR A 440      27.955  49.974  64.956  1.00  0.00           C
ATOM   3565  HD1 TYR A 440      28.935  50.077  64.514  1.00  0.00           H
ATOM   3566  CE1 TYR A 440      27.357  50.993  65.776  1.00  0.00           C
ATOM   3567  HE1 TYR A 440      27.859  51.927  65.979  1.00  0.00           H
ATOM   3568  CZ  TYR A 440      26.107  50.790  66.355  1.00  0.00           C
ATOM   3569  OH  TYR A 440      25.387  51.912  66.947  1.00  0.00           O
ATOM   3570  HH  TYR A 440      25.929  52.691  67.096  1.00  0.00           H
ATOM   3571  CD2 TYR A 440      26.007  48.509  65.367  1.00  0.00           C
ATOM   3572  HD2 TYR A 440      25.494  47.558  65.365  1.00  0.00           H
ATOM   3573  CE2 TYR A 440      25.469  49.520  66.152  1.00  0.00           C
ATOM   3574  HE2 TYR A 440      24.507  49.364  66.617  1.00  0.00           H
ATOM   3575  C   TYR A 440      28.691  45.264  64.106  1.00  0.00           C
ATOM   3576  O   TYR A 440      28.010  44.589  63.362  1.00  0.00           O
ATOM   3577  N   GLN A 441      30.006  45.033  64.050  1.00  0.00           N
ATOM   3578  HN  GLN A 441      30.634  45.589  64.589  1.00  0.00           H
ATOM   3579  CA  GLN A 441      30.572  43.967  63.300  1.00  0.00           C
ATOM   3580  HA  GLN A 441      30.244  44.036  62.273  1.00  0.00           H
ATOM   3581  CB  GLN A 441      32.120  44.182  63.376  1.00  0.00           C
ATOM   3582  HB1 GLN A 441      32.453  44.181  64.436  1.00  0.00           H
ATOM   3583  HB2 GLN A 441      32.645  43.328  62.899  1.00  0.00           H
ATOM   3584  CG  GLN A 441      32.834  45.452  62.735  1.00  0.00           C
ATOM   3585  HG1 GLN A 441      32.918  46.327  63.415  1.00  0.00           H
ATOM   3586  HG2 GLN A 441      33.784  45.104  62.275  1.00  0.00           H
ATOM   3587  CD  GLN A 441      31.917  45.893  61.533  1.00  0.00           C
ATOM   3588  OE1 GLN A 441      31.127  46.798  61.684  1.00  0.00           O
ATOM   3589  NE2 GLN A 441      32.018  45.172  60.397  1.00  0.00           N
ATOM   3590 1HE2 GLN A 441      32.647  44.396  60.441  1.00  0.00           H
ATOM   3591 2HE2 GLN A 441      31.573  45.552  59.586  1.00  0.00           H
ATOM   3592  C   GLN A 441      30.379  42.471  63.780  1.00  0.00           C
ATOM   3593  O   GLN A 441      30.339  41.570  62.970  1.00  0.00           O
ATOM   3594  N   ILE A 442      30.127  42.252  65.091  1.00  0.00           N
ATOM   3595  HN  ILE A 442      30.173  43.050  65.688  1.00  0.00           H
ATOM   3596  CA  ILE A 442      29.680  40.941  65.634  1.00  0.00           C
ATOM   3597  HA  ILE A 442      30.232  40.198  65.078  1.00  0.00           H
ATOM   3598  CB  ILE A 442      30.090  40.762  67.047  1.00  0.00           C
ATOM   3599  HB  ILE A 442      31.144  41.090  67.169  1.00  0.00           H
ATOM   3600  CG2 ILE A 442      29.358  41.749  67.968  1.00  0.00           C
ATOM   3601 1HG2 ILE A 442      29.500  42.815  67.689  1.00  0.00           H
ATOM   3602 2HG2 ILE A 442      28.301  41.425  68.080  1.00  0.00           H
ATOM   3603 3HG2 ILE A 442      29.838  41.709  68.968  1.00  0.00           H
ATOM   3604  CG1 ILE A 442      30.034  39.272  67.554  1.00  0.00           C
ATOM   3605 1HG1 ILE A 442      28.950  39.047  67.644  1.00  0.00           H
ATOM   3606 2HG1 ILE A 442      30.524  38.556  66.859  1.00  0.00           H
ATOM   3607  CD  ILE A 442      30.760  38.967  68.891  1.00  0.00           C
ATOM   3608  HD1 ILE A 442      30.644  37.901  69.179  1.00  0.00           H
ATOM   3609  HD2 ILE A 442      31.841  39.221  68.925  1.00  0.00           H
ATOM   3610  HD3 ILE A 442      30.315  39.544  69.730  1.00  0.00           H
ATOM   3611  C   ILE A 442      28.234  40.632  65.248  1.00  0.00           C
ATOM   3612  O   ILE A 442      27.837  39.497  65.180  1.00  0.00           O
ATOM   3613  N   GLY A 443      27.369  41.735  65.066  1.00  0.00           N
ATOM   3614  HN  GLY A 443      27.736  42.661  65.098  1.00  0.00           H
ATOM   3615  CA  GLY A 443      26.175  41.628  64.303  1.00  0.00           C
ATOM   3616  HA1 GLY A 443      25.388  41.390  65.003  1.00  0.00           H
ATOM   3617  HA2 GLY A 443      26.202  42.671  64.026  1.00  0.00           H
ATOM   3618  C   GLY A 443      26.194  40.764  63.086  1.00  0.00           C
ATOM   3619  O   GLY A 443      26.976  40.853  62.154  1.00  0.00           O
ATOM   3620  N   THR A 444      25.145  39.951  63.011  1.00  0.00           N
ATOM   3621  HN  THR A 444      24.559  39.828  63.808  1.00  0.00           H
ATOM   3622  CA  THR A 444      24.752  39.035  61.965  1.00  0.00           C
ATOM   3623  HA  THR A 444      23.772  38.640  62.191  1.00  0.00           H
ATOM   3624  CB  THR A 444      24.922  39.486  60.454  1.00  0.00           C
ATOM   3625  HB  THR A 444      25.975  39.628  60.127  1.00  0.00           H
ATOM   3626  OG1 THR A 444      24.068  40.591  60.246  1.00  0.00           O
ATOM   3627  HG1 THR A 444      24.397  41.192  60.919  1.00  0.00           H
ATOM   3628  CG2 THR A 444      24.381  38.348  59.490  1.00  0.00           C
ATOM   3629 1HG2 THR A 444      25.035  37.451  59.485  1.00  0.00           H
ATOM   3630 2HG2 THR A 444      23.337  38.044  59.721  1.00  0.00           H
ATOM   3631 3HG2 THR A 444      24.385  38.676  58.429  1.00  0.00           H
ATOM   3632  C   THR A 444      25.468  37.738  62.178  1.00  0.00           C
ATOM   3633  O   THR A 444      24.798  36.724  62.543  1.00  0.00           O
ATOM   3634  N   TRP A 445      26.827  37.621  62.021  1.00  0.00           N
ATOM   3635  HN  TRP A 445      27.313  38.476  61.860  1.00  0.00           H
ATOM   3636  CA  TRP A 445      27.534  36.356  62.082  1.00  0.00           C
ATOM   3637  HA  TRP A 445      27.107  35.657  61.378  1.00  0.00           H
ATOM   3638  CB  TRP A 445      28.967  36.678  61.761  1.00  0.00           C
ATOM   3639  HB1 TRP A 445      29.519  37.064  62.645  1.00  0.00           H
ATOM   3640  HB2 TRP A 445      29.562  35.753  61.604  1.00  0.00           H
ATOM   3641  CG  TRP A 445      29.120  37.604  60.506  1.00  0.00           C
ATOM   3642  CD1 TRP A 445      29.706  38.852  60.556  1.00  0.00           C
ATOM   3643  HD1 TRP A 445      30.171  39.278  61.433  1.00  0.00           H
ATOM   3644  NE1 TRP A 445      29.916  39.271  59.236  1.00  0.00           N
ATOM   3645  HE1 TRP A 445      30.432  40.048  58.948  1.00  0.00           H
ATOM   3646  CE2 TRP A 445      29.381  38.345  58.382  1.00  0.00           C
ATOM   3647  CD2 TRP A 445      28.832  37.279  59.159  1.00  0.00           C
ATOM   3648  CE3 TRP A 445      28.221  36.177  58.567  1.00  0.00           C
ATOM   3649  HE3 TRP A 445      27.861  35.388  59.211  1.00  0.00           H
ATOM   3650  CZ3 TRP A 445      28.306  36.139  57.167  1.00  0.00           C
ATOM   3651  HZ3 TRP A 445      27.874  35.346  56.574  1.00  0.00           H
ATOM   3652  CZ2 TRP A 445      29.363  38.332  57.037  1.00  0.00           C
ATOM   3653  HZ2 TRP A 445      29.700  39.147  56.413  1.00  0.00           H
ATOM   3654  CH2 TRP A 445      28.849  37.178  56.400  1.00  0.00           C
ATOM   3655  HH2 TRP A 445      28.859  37.142  55.321  1.00  0.00           H
ATOM   3656  C   TRP A 445      27.480  35.567  63.377  1.00  0.00           C
ATOM   3657  O   TRP A 445      27.406  34.366  63.404  1.00  0.00           O
ATOM   3658  N   LEU A 446      27.464  36.204  64.522  1.00  0.00           N
ATOM   3659  HN  LEU A 446      27.426  37.199  64.576  1.00  0.00           H
ATOM   3660  CA  LEU A 446      27.368  35.560  65.800  1.00  0.00           C
ATOM   3661  HA  LEU A 446      27.167  34.501  65.739  1.00  0.00           H
ATOM   3662  CB  LEU A 446      28.697  35.637  66.564  1.00  0.00           C
ATOM   3663  HB1 LEU A 446      29.467  35.143  65.934  1.00  0.00           H
ATOM   3664  HB2 LEU A 446      28.912  36.676  66.896  1.00  0.00           H
ATOM   3665  CG  LEU A 446      28.696  34.999  68.031  1.00  0.00           C
ATOM   3666  HG  LEU A 446      28.182  34.018  67.945  1.00  0.00           H
ATOM   3667  CD1 LEU A 446      30.115  34.723  68.490  1.00  0.00           C
ATOM   3668 1HD1 LEU A 446      30.737  34.134  67.782  1.00  0.00           H
ATOM   3669 2HD1 LEU A 446      30.744  35.599  68.760  1.00  0.00           H
ATOM   3670 3HD1 LEU A 446      29.973  34.076  69.382  1.00  0.00           H
ATOM   3671  CD2 LEU A 446      27.988  35.874  69.114  1.00  0.00           C
ATOM   3672 1HD2 LEU A 446      26.900  35.811  68.899  1.00  0.00           H
ATOM   3673 2HD2 LEU A 446      28.265  35.457  70.106  1.00  0.00           H
ATOM   3674 3HD2 LEU A 446      28.252  36.951  69.040  1.00  0.00           H
ATOM   3675  C   LEU A 446      26.168  36.252  66.584  1.00  0.00           C
ATOM   3676  O   LEU A 446      25.173  35.568  66.973  1.00  0.00           O
ATOM   3677  N   LEU A 447      26.151  37.612  66.761  1.00  0.00           N
ATOM   3678  HN  LEU A 447      26.911  38.092  66.330  1.00  0.00           H
ATOM   3679  CA  LEU A 447      25.169  38.251  67.505  1.00  0.00           C
ATOM   3680  HA  LEU A 447      24.782  37.786  68.400  1.00  0.00           H
ATOM   3681  CB  LEU A 447      25.686  39.635  67.908  1.00  0.00           C
ATOM   3682  HB1 LEU A 447      26.682  39.516  68.386  1.00  0.00           H
ATOM   3683  HB2 LEU A 447      25.785  40.273  67.004  1.00  0.00           H
ATOM   3684  CG  LEU A 447      24.789  40.474  68.835  1.00  0.00           C
ATOM   3685  HG  LEU A 447      23.903  40.830  68.268  1.00  0.00           H
ATOM   3686  CD1 LEU A 447      24.384  39.803  70.171  1.00  0.00           C
ATOM   3687 1HD1 LEU A 447      25.196  39.289  70.728  1.00  0.00           H
ATOM   3688 2HD1 LEU A 447      23.911  40.545  70.849  1.00  0.00           H
ATOM   3689 3HD1 LEU A 447      23.615  39.013  70.029  1.00  0.00           H
ATOM   3690  CD2 LEU A 447      25.714  41.624  69.188  1.00  0.00           C
ATOM   3691 1HD2 LEU A 447      26.754  41.417  69.518  1.00  0.00           H
ATOM   3692 2HD2 LEU A 447      25.746  42.356  68.353  1.00  0.00           H
ATOM   3693 3HD2 LEU A 447      25.248  42.178  70.031  1.00  0.00           H
ATOM   3694  C   LEU A 447      23.995  38.631  66.577  1.00  0.00           C
ATOM   3695  O   LEU A 447      24.123  39.378  65.602  1.00  0.00           O
ATOM   3696  N   ASP A 448      22.808  38.034  66.899  1.00  0.00           N
ATOM   3697  HN  ASP A 448      22.726  37.497  67.735  1.00  0.00           H
ATOM   3698  CA  ASP A 448      21.581  38.359  66.226  1.00  0.00           C
ATOM   3699  HA  ASP A 448      21.726  37.913  65.253  1.00  0.00           H
ATOM   3700  CB  ASP A 448      20.442  37.536  66.904  1.00  0.00           C
ATOM   3701  HB1 ASP A 448      20.802  36.485  66.896  1.00  0.00           H
ATOM   3702  HB2 ASP A 448      20.256  37.605  67.997  1.00  0.00           H
ATOM   3703  CG  ASP A 448      18.997  37.574  66.309  1.00  0.00           C
ATOM   3704  OD1 ASP A 448      18.147  36.724  66.770  1.00  0.00           O
ATOM   3705  OD2 ASP A 448      18.670  38.409  65.393  1.00  0.00           O
ATOM   3706  C   ASP A 448      21.230  39.804  66.070  1.00  0.00           C
ATOM   3707  O   ASP A 448      21.385  40.584  67.024  1.00  0.00           O
ATOM   3708  N   SER A 449      20.695  40.227  64.894  1.00  0.00           N
ATOM   3709  HN  SER A 449      20.506  39.528  64.208  1.00  0.00           H
ATOM   3710  CA  SER A 449      20.270  41.595  64.636  1.00  0.00           C
ATOM   3711  HA  SER A 449      21.099  42.259  64.832  1.00  0.00           H
ATOM   3712  CB  SER A 449      19.846  41.828  63.155  1.00  0.00           C
ATOM   3713  HB1 SER A 449      19.511  42.881  63.035  1.00  0.00           H
ATOM   3714  HB2 SER A 449      20.795  41.660  62.604  1.00  0.00           H
ATOM   3715  OG  SER A 449      18.856  40.852  62.742  1.00  0.00           O
ATOM   3716  HG1 SER A 449      19.300  40.003  62.694  1.00  0.00           H
ATOM   3717  C   SER A 449      19.235  42.131  65.672  1.00  0.00           C
ATOM   3718  O   SER A 449      19.323  43.287  66.138  1.00  0.00           O
ATOM   3719  N   GLU A 450      18.230  41.297  66.070  1.00  0.00           N
ATOM   3720  HN  GLU A 450      17.981  40.429  65.648  1.00  0.00           H
ATOM   3721  CA  GLU A 450      17.392  41.744  67.122  1.00  0.00           C
ATOM   3722  HA  GLU A 450      16.876  42.668  66.907  1.00  0.00           H
ATOM   3723  CB  GLU A 450      16.240  40.776  67.235  1.00  0.00           C
ATOM   3724  HB1 GLU A 450      16.756  39.832  67.513  1.00  0.00           H
ATOM   3725  HB2 GLU A 450      15.562  41.225  67.992  1.00  0.00           H
ATOM   3726  CG  GLU A 450      15.367  40.618  65.954  1.00  0.00           C
ATOM   3727  HG1 GLU A 450      15.125  41.589  65.469  1.00  0.00           H
ATOM   3728  HG2 GLU A 450      15.933  40.100  65.150  1.00  0.00           H
ATOM   3729  CD  GLU A 450      13.973  40.005  66.235  1.00  0.00           C
ATOM   3730  OE1 GLU A 450      13.958  38.810  66.558  1.00  0.00           O
ATOM   3731  OE2 GLU A 450      12.929  40.692  66.156  1.00  0.00           O
ATOM   3732  C   GLU A 450      18.029  41.890  68.532  1.00  0.00           C
ATOM   3733  O   GLU A 450      17.620  42.655  69.348  1.00  0.00           O
ATOM   3734  N   ALA A 451      19.105  41.100  68.749  1.00  0.00           N
ATOM   3735  HN  ALA A 451      19.434  40.609  67.946  1.00  0.00           H
ATOM   3736  CA  ALA A 451      19.971  41.036  69.968  1.00  0.00           C
ATOM   3737  HA  ALA A 451      19.222  41.042  70.746  1.00  0.00           H
ATOM   3738  CB  ALA A 451      20.783  39.750  70.120  1.00  0.00           C
ATOM   3739  HB1 ALA A 451      21.513  39.608  69.294  1.00  0.00           H
ATOM   3740  HB2 ALA A 451      21.315  39.692  71.093  1.00  0.00           H
ATOM   3741  HB3 ALA A 451      20.178  38.829  70.260  1.00  0.00           H
ATOM   3742  C   ALA A 451      20.779  42.288  70.113  1.00  0.00           C
ATOM   3743  O   ALA A 451      20.812  42.920  71.157  1.00  0.00           O
ATOM   3744  N   LEU A 452      21.400  42.610  68.991  1.00  0.00           N
ATOM   3745  HN  LEU A 452      21.429  41.912  68.280  1.00  0.00           H
ATOM   3746  CA  LEU A 452      22.066  43.871  68.790  1.00  0.00           C
ATOM   3747  HA  LEU A 452      22.787  43.908  69.593  1.00  0.00           H
ATOM   3748  CB  LEU A 452      22.956  43.852  67.478  1.00  0.00           C
ATOM   3749  HB1 LEU A 452      23.538  42.906  67.497  1.00  0.00           H
ATOM   3750  HB2 LEU A 452      22.176  43.628  66.719  1.00  0.00           H
ATOM   3751  CG  LEU A 452      23.611  45.088  67.005  1.00  0.00           C
ATOM   3752  HG  LEU A 452      22.843  45.888  66.925  1.00  0.00           H
ATOM   3753  CD1 LEU A 452      24.676  45.578  67.947  1.00  0.00           C
ATOM   3754 1HD1 LEU A 452      24.137  45.592  68.919  1.00  0.00           H
ATOM   3755 2HD1 LEU A 452      25.485  44.820  67.877  1.00  0.00           H
ATOM   3756 3HD1 LEU A 452      24.985  46.589  67.608  1.00  0.00           H
ATOM   3757  CD2 LEU A 452      24.191  44.767  65.552  1.00  0.00           C
ATOM   3758 1HD2 LEU A 452      24.559  45.739  65.160  1.00  0.00           H
ATOM   3759 2HD2 LEU A 452      24.962  43.968  65.597  1.00  0.00           H
ATOM   3760 3HD2 LEU A 452      23.302  44.588  64.911  1.00  0.00           H
ATOM   3761  C   LEU A 452      21.174  45.107  68.911  1.00  0.00           C
ATOM   3762  O   LEU A 452      21.629  45.974  69.615  1.00  0.00           O
ATOM   3763  N   HIS A 453      19.937  45.157  68.455  1.00  0.00           N
ATOM   3764  HN  HIS A 453      19.596  44.335  68.005  1.00  0.00           H
ATOM   3765  CA  HIS A 453      19.059  46.306  68.387  1.00  0.00           C
ATOM   3766  HA  HIS A 453      19.588  47.134  67.937  1.00  0.00           H
ATOM   3767  CB  HIS A 453      17.675  46.058  67.588  1.00  0.00           C
ATOM   3768  HB1 HIS A 453      17.855  45.980  66.494  1.00  0.00           H
ATOM   3769  HB2 HIS A 453      17.143  45.134  67.899  1.00  0.00           H
ATOM   3770  ND1 HIS A 453      16.332  48.189  67.030  1.00  0.00           N
ATOM   3771  CG  HIS A 453      16.564  47.134  67.874  1.00  0.00           C
ATOM   3772  CE1 HIS A 453      15.145  48.653  67.353  1.00  0.00           C
ATOM   3773  HE1 HIS A 453      14.519  49.421  66.898  1.00  0.00           H
ATOM   3774  NE2 HIS A 453      14.555  47.949  68.313  1.00  0.00           N
ATOM   3775  HE2 HIS A 453      13.633  47.957  68.701  1.00  0.00           H
ATOM   3776  CD2 HIS A 453      15.457  46.907  68.618  1.00  0.00           C
ATOM   3777  HD2 HIS A 453      15.107  46.037  69.162  1.00  0.00           H
ATOM   3778  C   HIS A 453      18.994  47.161  69.672  1.00  0.00           C
ATOM   3779  O   HIS A 453      19.200  48.390  69.551  1.00  0.00           O
ATOM   3780  N   PRO A 454      18.783  46.669  70.905  1.00  0.00           N
ATOM   3781  CD  PRO A 454      18.303  45.330  71.142  1.00  0.00           C
ATOM   3782  HD1 PRO A 454      18.989  44.540  70.768  1.00  0.00           H
ATOM   3783  HD2 PRO A 454      17.259  45.138  70.811  1.00  0.00           H
ATOM   3784  CA  PRO A 454      18.677  47.547  72.124  1.00  0.00           C
ATOM   3785  HA  PRO A 454      18.153  48.451  71.851  1.00  0.00           H
ATOM   3786  CB  PRO A 454      17.840  46.681  73.067  1.00  0.00           C
ATOM   3787  HB1 PRO A 454      18.018  46.914  74.139  1.00  0.00           H
ATOM   3788  HB2 PRO A 454      16.774  46.954  72.916  1.00  0.00           H
ATOM   3789  CG  PRO A 454      18.250  45.193  72.671  1.00  0.00           C
ATOM   3790  HG1 PRO A 454      19.202  45.027  73.221  1.00  0.00           H
ATOM   3791  HG2 PRO A 454      17.521  44.516  73.166  1.00  0.00           H
ATOM   3792  C   PRO A 454      20.018  47.912  72.654  1.00  0.00           C
ATOM   3793  O   PRO A 454      20.045  48.592  73.703  1.00  0.00           O
ATOM   3794  N   LEU A 455      21.146  47.466  72.109  1.00  0.00           N
ATOM   3795  HN  LEU A 455      21.064  46.809  71.364  1.00  0.00           H
ATOM   3796  CA  LEU A 455      22.449  48.082  72.335  1.00  0.00           C
ATOM   3797  HA  LEU A 455      22.517  48.727  73.198  1.00  0.00           H
ATOM   3798  CB  LEU A 455      23.537  46.995  72.480  1.00  0.00           C
ATOM   3799  HB1 LEU A 455      23.782  46.499  71.516  1.00  0.00           H
ATOM   3800  HB2 LEU A 455      24.434  47.530  72.859  1.00  0.00           H
ATOM   3801  CG  LEU A 455      23.163  45.917  73.540  1.00  0.00           C
ATOM   3802  HG  LEU A 455      22.253  45.362  73.227  1.00  0.00           H
ATOM   3803  CD1 LEU A 455      24.341  44.944  73.518  1.00  0.00           C
ATOM   3804 1HD1 LEU A 455      24.147  44.053  74.151  1.00  0.00           H
ATOM   3805 2HD1 LEU A 455      24.515  44.622  72.469  1.00  0.00           H
ATOM   3806 3HD1 LEU A 455      25.264  45.468  73.846  1.00  0.00           H
ATOM   3807  CD2 LEU A 455      22.955  46.629  74.919  1.00  0.00           C
ATOM   3808 1HD2 LEU A 455      22.956  45.799  75.658  1.00  0.00           H
ATOM   3809 2HD2 LEU A 455      23.862  47.240  75.111  1.00  0.00           H
ATOM   3810 3HD2 LEU A 455      22.105  47.335  74.807  1.00  0.00           H
ATOM   3811  C   LEU A 455      22.766  48.985  71.200  1.00  0.00           C
ATOM   3812  O   LEU A 455      23.358  50.040  71.467  1.00  0.00           O
ATOM   3813  N   GLY A 456      22.286  48.690  69.966  1.00  0.00           N
ATOM   3814  HN  GLY A 456      21.838  47.814  69.805  1.00  0.00           H
ATOM   3815  CA  GLY A 456      22.210  49.592  68.761  1.00  0.00           C
ATOM   3816  HA1 GLY A 456      23.236  49.727  68.451  1.00  0.00           H
ATOM   3817  HA2 GLY A 456      21.562  49.126  68.033  1.00  0.00           H
ATOM   3818  C   GLY A 456      21.551  50.951  68.904  1.00  0.00           C
ATOM   3819  O   GLY A 456      20.461  51.052  69.464  1.00  0.00           O
ATOM   3820  N   MET A 457      22.121  52.027  68.418  1.00  0.00           N
ATOM   3821  HN  MET A 457      23.029  51.917  68.021  1.00  0.00           H
ATOM   3822  CA  MET A 457      21.370  53.296  68.082  1.00  0.00           C
ATOM   3823  HA  MET A 457      20.793  53.556  68.958  1.00  0.00           H
ATOM   3824  CB  MET A 457      22.397  54.436  67.880  1.00  0.00           C
ATOM   3825  HB1 MET A 457      23.003  54.147  66.994  1.00  0.00           H
ATOM   3826  HB2 MET A 457      21.849  55.369  67.630  1.00  0.00           H
ATOM   3827  CG  MET A 457      23.270  54.754  69.112  1.00  0.00           C
ATOM   3828  HG1 MET A 457      23.908  53.848  69.191  1.00  0.00           H
ATOM   3829  HG2 MET A 457      23.880  55.643  68.846  1.00  0.00           H
ATOM   3830  SD  MET A 457      22.324  55.086  70.722  1.00  0.00           S
ATOM   3831  CE  MET A 457      22.115  56.811  70.390  1.00  0.00           C
ATOM   3832  HE1 MET A 457      21.439  56.849  69.510  1.00  0.00           H
ATOM   3833  HE2 MET A 457      21.667  57.357  71.248  1.00  0.00           H
ATOM   3834  HE3 MET A 457      23.096  57.330  70.331  1.00  0.00           H
ATOM   3835  C   MET A 457      20.427  53.248  66.870  1.00  0.00           C
ATOM   3836  O   MET A 457      20.668  52.525  65.914  1.00  0.00           O
ATOM   3837  N   ALA A 458      19.296  53.948  66.895  1.00  0.00           N
ATOM   3838  HN  ALA A 458      19.057  54.513  67.681  1.00  0.00           H
ATOM   3839  CA  ALA A 458      18.431  54.111  65.770  1.00  0.00           C
ATOM   3840  HA  ALA A 458      18.730  53.411  65.004  1.00  0.00           H
ATOM   3841  CB  ALA A 458      16.990  53.648  66.198  1.00  0.00           C
ATOM   3842  HB1 ALA A 458      16.349  53.801  65.303  1.00  0.00           H
ATOM   3843  HB2 ALA A 458      16.943  52.578  66.493  1.00  0.00           H
ATOM   3844  HB3 ALA A 458      16.545  54.170  67.072  1.00  0.00           H
ATOM   3845  C   ALA A 458      18.260  55.575  65.323  1.00  0.00           C
ATOM   3846  O   ALA A 458      17.496  55.881  64.353  1.00  0.00           O
ATOM   3847  N   VAL A 459      18.925  56.463  66.120  1.00  0.00           N
ATOM   3848  HN  VAL A 459      19.473  56.063  66.851  1.00  0.00           H
ATOM   3849  CA  VAL A 459      18.805  57.905  66.062  1.00  0.00           C
ATOM   3850  HA  VAL A 459      18.242  58.183  65.183  1.00  0.00           H
ATOM   3851  CB  VAL A 459      18.113  58.507  67.245  1.00  0.00           C
ATOM   3852  HB  VAL A 459      18.744  58.289  68.133  1.00  0.00           H
ATOM   3853  CG1 VAL A 459      17.988  60.057  66.912  1.00  0.00           C
ATOM   3854 1HG1 VAL A 459      17.425  60.659  67.656  1.00  0.00           H
ATOM   3855 2HG1 VAL A 459      18.922  60.645  66.787  1.00  0.00           H
ATOM   3856 3HG1 VAL A 459      17.473  60.149  65.932  1.00  0.00           H
ATOM   3857  CG2 VAL A 459      16.652  57.947  67.450  1.00  0.00           C
ATOM   3858 1HG2 VAL A 459      16.589  56.911  67.845  1.00  0.00           H
ATOM   3859 2HG2 VAL A 459      15.947  58.656  67.935  1.00  0.00           H
ATOM   3860 3HG2 VAL A 459      16.275  57.783  66.418  1.00  0.00           H
ATOM   3861  C   VAL A 459      20.256  58.407  66.060  1.00  0.00           C
ATOM   3862  O   VAL A 459      21.091  57.985  66.834  1.00  0.00           O
ATOM   3863  N   LYS A 460      20.522  59.385  65.248  1.00  0.00           N
ATOM   3864  HN  LYS A 460      19.795  59.834  64.734  1.00  0.00           H
ATOM   3865  CA  LYS A 460      21.798  59.986  65.013  1.00  0.00           C
ATOM   3866  HA  LYS A 460      22.559  59.238  64.851  1.00  0.00           H
ATOM   3867  CB  LYS A 460      21.972  60.828  63.708  1.00  0.00           C
ATOM   3868  HB1 LYS A 460      21.276  61.689  63.620  1.00  0.00           H
ATOM   3869  HB2 LYS A 460      22.980  61.291  63.643  1.00  0.00           H
ATOM   3870  CG  LYS A 460      21.995  59.909  62.491  1.00  0.00           C
ATOM   3871  HG1 LYS A 460      22.906  59.292  62.644  1.00  0.00           H
ATOM   3872  HG2 LYS A 460      21.055  59.324  62.403  1.00  0.00           H
ATOM   3873  CD  LYS A 460      22.264  60.702  61.186  1.00  0.00           C
ATOM   3874  HD1 LYS A 460      21.382  61.344  60.972  1.00  0.00           H
ATOM   3875  HD2 LYS A 460      23.055  61.463  61.360  1.00  0.00           H
ATOM   3876  CE  LYS A 460      22.725  59.971  59.984  1.00  0.00           C
ATOM   3877  HE1 LYS A 460      21.919  59.378  59.501  1.00  0.00           H
ATOM   3878  HE2 LYS A 460      23.013  60.581  59.101  1.00  0.00           H
ATOM   3879  NZ  LYS A 460      23.832  59.060  60.313  1.00  0.00           N
ATOM   3880  HZ1 LYS A 460      24.033  58.452  59.494  1.00  0.00           H
ATOM   3881  HZ2 LYS A 460      24.680  59.640  60.477  1.00  0.00           H
ATOM   3882  HZ3 LYS A 460      23.546  58.436  61.095  1.00  0.00           H
ATOM   3883  C   LYS A 460      22.323  60.812  66.156  1.00  0.00           C
ATOM   3884  O   LYS A 460      21.659  61.027  67.181  1.00  0.00           O
ATOM   3885  N   SER A 461      23.608  61.220  66.181  1.00  0.00           N
ATOM   3886  HN  SER A 461      24.219  60.985  65.430  1.00  0.00           H
ATOM   3887  CA  SER A 461      24.132  62.111  67.244  1.00  0.00           C
ATOM   3888  HA  SER A 461      23.390  62.588  67.866  1.00  0.00           H
ATOM   3889  CB  SER A 461      25.073  61.301  68.191  1.00  0.00           C
ATOM   3890  HB1 SER A 461      25.810  60.718  67.598  1.00  0.00           H
ATOM   3891  HB2 SER A 461      25.582  62.080  68.797  1.00  0.00           H
ATOM   3892  OG  SER A 461      24.339  60.344  68.959  1.00  0.00           O
ATOM   3893  HG1 SER A 461      24.870  60.105  69.722  1.00  0.00           H
ATOM   3894  C   SER A 461      24.908  63.250  66.711  1.00  0.00           C
ATOM   3895  O   SER A 461      25.861  63.078  65.888  1.00  0.00           O
ATOM   3896  N   SER A 462      24.486  64.483  67.148  1.00  0.00           N
ATOM   3897  HN  SER A 462      23.754  64.485  67.825  1.00  0.00           H
ATOM   3898  CA  SER A 462      25.032  65.758  66.542  1.00  0.00           C
ATOM   3899  HA  SER A 462      25.847  65.564  65.861  1.00  0.00           H
ATOM   3900  CB  SER A 462      23.930  66.618  65.937  1.00  0.00           C
ATOM   3901  HB1 SER A 462      23.173  67.090  66.599  1.00  0.00           H
ATOM   3902  HB2 SER A 462      24.304  67.325  65.166  1.00  0.00           H
ATOM   3903  OG  SER A 462      23.139  65.725  65.087  1.00  0.00           O
ATOM   3904  HG1 SER A 462      22.623  65.188  65.693  1.00  0.00           H
ATOM   3905  C   SER A 462      25.708  66.562  67.569  1.00  0.00           C
ATOM   3906  OT1 SER A 462      26.291  67.660  67.273  1.00  0.00           O
ATOM   3907  OT2 SER A 462      25.770  66.211  68.757  1.00  0.00           O
ATOM   3908  C3  RES B 463      36.579  38.882  60.947  1.00  0.00           C
ATOM   3909  H3  RES B 463      37.674  38.694  60.923  1.00  0.00           H
ATOM   3910  O3  RES B 463      36.157  38.603  59.637  1.00  0.00           O
ATOM   3911  H3' RES B 463      36.555  39.252  59.053  1.00  0.00           H
ATOM   3912  C4  RES B 463      35.804  37.956  61.985  1.00  0.00           C
ATOM   3913  H4A RES B 463      34.771  37.926  61.576  1.00  0.00           H
ATOM   3914  H4B RES B 463      36.207  36.934  61.821  1.00  0.00           H
ATOM   3915  C5  RES B 463      35.909  38.280  63.432  1.00  0.00           C
ATOM   3916  C6  RES B 463      36.400  37.350  64.299  1.00  0.00           C
ATOM   3917  H6  RES B 463      36.658  36.320  64.012  1.00  0.00           H
ATOM   3918  C7  RES B 463      36.483  37.631  65.744  1.00  0.00           C
ATOM   3919  H7A RES B 463      37.529  37.644  66.119  1.00  0.00           H
ATOM   3920  H7B RES B 463      35.871  36.788  66.129  1.00  0.00           H
ATOM   3921  C8  RES B 463      35.852  38.984  66.174  1.00  0.00           C
ATOM   3922  H8  RES B 463      34.792  38.654  66.211  1.00  0.00           H
ATOM   3923  C14 RES B 463      36.464  39.391  67.510  1.00  0.00           C
ATOM   3924  H14 RES B 463      37.527  39.636  67.299  1.00  0.00           H
ATOM   3925  C15 RES B 463      36.618  38.455  68.709  1.00  0.00           C
ATOM   3926 H15A RES B 463      37.472  37.744  68.718  1.00  0.00           H
ATOM   3927 H15B RES B 463      35.749  37.768  68.799  1.00  0.00           H
ATOM   3928  C16 RES B 463      36.647  39.388  69.997  1.00  0.00           C
ATOM   3929 H16A RES B 463      35.845  39.156  70.730  1.00  0.00           H
ATOM   3930 H16B RES B 463      37.626  39.271  70.510  1.00  0.00           H
ATOM   3931  C17 RES B 463      36.512  40.770  69.424  1.00  0.00           C
ATOM   3932  H17 RES B 463      37.492  41.024  68.966  1.00  0.00           H
ATOM   3933  C13 RES B 463      35.764  40.644  68.132  1.00  0.00           C
ATOM   3934  C18 RES B 463      34.205  40.359  68.386  1.00  0.00           C
ATOM   3935 H18A RES B 463      33.701  41.116  69.024  1.00  0.00           H
ATOM   3936 H18B RES B 463      33.643  40.345  67.428  1.00  0.00           H
ATOM   3937 H18C RES B 463      34.065  39.364  68.860  1.00  0.00           H
ATOM   3938  C12 RES B 463      35.794  41.788  67.177  1.00  0.00           C
ATOM   3939 H12A RES B 463      36.820  42.203  67.081  1.00  0.00           H
ATOM   3940 H12B RES B 463      35.030  42.557  67.420  1.00  0.00           H
ATOM   3941  C11 RES B 463      35.302  41.380  65.720  1.00  0.00           C
ATOM   3942 H11A RES B 463      34.192  41.364  65.754  1.00  0.00           H
ATOM   3943 H11B RES B 463      35.536  42.252  65.073  1.00  0.00           H
ATOM   3944  C9  RES B 463      35.994  40.148  65.139  1.00  0.00           C
ATOM   3945  H9  RES B 463      37.082  40.372  65.171  1.00  0.00           H
ATOM   3946  C10 RES B 463      35.652  39.880  63.735  1.00  0.00           C
ATOM   3947  C19 RES B 463      34.050  40.079  63.482  1.00  0.00           C
ATOM   3948 H19A RES B 463      33.894  41.176  63.557  1.00  0.00           H
ATOM   3949 H19B RES B 463      33.411  39.567  64.233  1.00  0.00           H
ATOM   3950 H19C RES B 463      33.870  39.730  62.443  1.00  0.00           H
ATOM   3951  C1  RES B 463      36.460  40.737  62.705  1.00  0.00           C
ATOM   3952  H1A RES B 463      37.506  40.743  63.078  1.00  0.00           H
ATOM   3953  H1B RES B 463      36.161  41.807  62.722  1.00  0.00           H
ATOM   3954  C2  RES B 463      36.347  40.363  61.225  1.00  0.00           C
ATOM   3955  H2A RES B 463      35.280  40.496  60.944  1.00  0.00           H
ATOM   3956  H2B RES B 463      37.052  40.971  60.619  1.00  0.00           H
ATOM   3957  C20 RES B 463      36.076  41.971  70.353  1.00  0.00           C
ATOM   3958  H20 RES B 463      35.524  42.687  69.707  1.00  0.00           H
ATOM   3959  C21 RES B 463      37.350  42.552  70.919  1.00  0.00           C
ATOM   3960 H21A RES B 463      37.942  41.795  71.476  1.00  0.00           H
ATOM   3961 H21B RES B 463      37.083  43.436  71.538  1.00  0.00           H
ATOM   3962 H21C RES B 463      37.955  42.914  70.060  1.00  0.00           H
ATOM   3963  C22 RES B 463      35.060  41.587  71.449  1.00  0.00           C
ATOM   3964 H22A RES B 463      34.228  40.950  71.079  1.00  0.00           H
ATOM   3965 H22B RES B 463      35.597  41.058  72.265  1.00  0.00           H
ATOM   3966  C23 RES B 463      34.423  42.815  72.155  1.00  0.00           C
ATOM   3967 H23A RES B 463      34.321  42.560  73.232  1.00  0.00           H
ATOM   3968 H23B RES B 463      35.030  43.741  72.065  1.00  0.00           H
ATOM   3969  C24 RES B 463      33.033  43.224  71.481  1.00  0.00           C
ATOM   3970 H24A RES B 463      32.510  42.292  71.177  1.00  0.00           H
ATOM   3971 H24B RES B 463      33.311  43.729  70.532  1.00  0.00           H
ATOM   3972  C25 RES B 463      32.195  44.194  72.372  1.00  0.00           C
ATOM   3973  H25 RES B 463      31.606  43.618  73.117  1.00  0.00           H
ATOM   3974  C26 RES B 463      31.152  44.817  71.446  1.00  0.00           C
ATOM   3975 H26A RES B 463      30.571  44.041  70.904  1.00  0.00           H
ATOM   3976 H26B RES B 463      31.597  45.496  70.688  1.00  0.00           H
ATOM   3977 H26C RES B 463      30.527  45.405  72.152  1.00  0.00           H
ATOM   3978  C27 RES B 463      32.936  45.322  73.059  1.00  0.00           C
ATOM   3979 H27A RES B 463      33.872  45.078  73.605  1.00  0.00           H
ATOM   3980 H27B RES B 463      32.239  45.728  73.824  1.00  0.00           H
ATOM   3981 H27C RES B 463      33.122  46.201  72.405  1.00  0.00           H
ATOM   3982  C3  CHL1C 464      18.892   6.430 119.957  1.00  0.00           C
ATOM   3983  H3  CHL1C 464      17.818   6.651 120.135  1.00  0.00           H
ATOM   3984  O3  CHL1C 464      19.443   5.840 121.097  1.00  0.00           O
ATOM   3985  H3' CHL1C 464      18.890   5.072 121.257  1.00  0.00           H
ATOM   3986  C4  CHL1C 464      18.997   5.376 118.761  1.00  0.00           C
ATOM   3987  H4A CHL1C 464      19.973   4.847 118.787  1.00  0.00           H
ATOM   3988  H4B CHL1C 464      18.179   4.637 118.903  1.00  0.00           H
ATOM   3989  C5  CHL1C 464      18.778   5.993 117.375  1.00  0.00           C
ATOM   3990  C6  CHL1C 464      17.918   5.368 116.466  1.00  0.00           C
ATOM   3991  H6  CHL1C 464      17.394   4.486 116.864  1.00  0.00           H
ATOM   3992  C7  CHL1C 464      17.646   5.751 115.052  1.00  0.00           C
ATOM   3993  H7A CHL1C 464      17.873   4.913 114.359  1.00  0.00           H
ATOM   3994  H7B CHL1C 464      16.563   5.978 114.955  1.00  0.00           H
ATOM   3995  C8  CHL1C 464      18.382   7.070 114.625  1.00  0.00           C
ATOM   3996  H8  CHL1C 464      19.332   6.676 114.206  1.00  0.00           H
ATOM   3997  C14 CHL1C 464      17.598   7.756 113.539  1.00  0.00           C
ATOM   3998  H14 CHL1C 464      16.567   7.972 113.890  1.00  0.00           H
ATOM   3999  C15 CHL1C 464      17.278   6.999 112.284  1.00  0.00           C
ATOM   4000 H15A CHL1C 464      18.170   6.417 111.968  1.00  0.00           H
ATOM   4001 H15B CHL1C 464      16.552   6.216 112.592  1.00  0.00           H
ATOM   4002  C16 CHL1C 464      16.868   7.994 111.208  1.00  0.00           C
ATOM   4003 H16A CHL1C 464      17.513   7.743 110.340  1.00  0.00           H
ATOM   4004 H16B CHL1C 464      15.783   7.818 111.048  1.00  0.00           H
ATOM   4005  C17 CHL1C 464      17.234   9.378 111.830  1.00  0.00           C
ATOM   4006  H17 CHL1C 464      16.295   9.741 112.299  1.00  0.00           H
ATOM   4007  C13 CHL1C 464      18.213   9.096 112.994  1.00  0.00           C
ATOM   4008  C18 CHL1C 464      19.583   8.804 112.416  1.00  0.00           C
ATOM   4009 H18A CHL1C 464      20.207   9.682 112.145  1.00  0.00           H
ATOM   4010 H18B CHL1C 464      20.290   8.249 113.070  1.00  0.00           H
ATOM   4011 H18C CHL1C 464      19.635   8.305 111.425  1.00  0.00           H
ATOM   4012  C12 CHL1C 464      18.352  10.048 114.236  1.00  0.00           C
ATOM   4013 H12A CHL1C 464      18.890  10.936 113.842  1.00  0.00           H
ATOM   4014 H12B CHL1C 464      17.353  10.385 114.587  1.00  0.00           H
ATOM   4015  C11 CHL1C 464      19.162   9.391 115.398  1.00  0.00           C
ATOM   4016 H11A CHL1C 464      20.259   9.499 115.256  1.00  0.00           H
ATOM   4017 H11B CHL1C 464      19.043  10.047 116.287  1.00  0.00           H
ATOM   4018  C9  CHL1C 464      18.627   7.978 115.856  1.00  0.00           C
ATOM   4019  H9  CHL1C 464      17.611   8.175 116.261  1.00  0.00           H
ATOM   4020  C10 CHL1C 464      19.483   7.335 117.071  1.00  0.00           C
ATOM   4021  C19 CHL1C 464      20.945   7.041 116.675  1.00  0.00           C
ATOM   4022 H19A CHL1C 464      21.576   6.576 117.463  1.00  0.00           H
ATOM   4023 H19B CHL1C 464      21.022   6.283 115.866  1.00  0.00           H
ATOM   4024 H19C CHL1C 464      21.512   7.958 116.409  1.00  0.00           H
ATOM   4025  C1  CHL1C 464      19.368   8.259 118.324  1.00  0.00           C
ATOM   4026  H1A CHL1C 464      20.004   9.158 118.178  1.00  0.00           H
ATOM   4027  H1B CHL1C 464      18.307   8.578 118.410  1.00  0.00           H
ATOM   4028  C2  CHL1C 464      19.763   7.580 119.693  1.00  0.00           C
ATOM   4029  H2A CHL1C 464      19.552   8.372 120.443  1.00  0.00           H
ATOM   4030  H2B CHL1C 464      20.845   7.326 119.710  1.00  0.00           H
ATOM   4031  C20 CHL1C 464      17.715  10.418 110.790  1.00  0.00           C
ATOM   4032  H20 CHL1C 464      18.590  10.094 110.187  1.00  0.00           H
ATOM   4033  C21 CHL1C 464      18.054  11.726 111.550  1.00  0.00           C
ATOM   4034 H21A CHL1C 464      17.379  11.879 112.419  1.00  0.00           H
ATOM   4035 H21B CHL1C 464      17.911  12.579 110.852  1.00  0.00           H
ATOM   4036 H21C CHL1C 464      19.099  11.829 111.914  1.00  0.00           H
ATOM   4037  C22 CHL1C 464      16.559  10.673 109.752  1.00  0.00           C
ATOM   4038 H22A CHL1C 464      16.442   9.783 109.099  1.00  0.00           H
ATOM   4039 H22B CHL1C 464      15.625  11.023 110.241  1.00  0.00           H
ATOM   4040  C23 CHL1C 464      16.839  11.778 108.667  1.00  0.00           C
ATOM   4041 H23A CHL1C 464      16.729  12.763 109.170  1.00  0.00           H
ATOM   4042 H23B CHL1C 464      17.881  11.604 108.325  1.00  0.00           H
ATOM   4043  C24 CHL1C 464      15.695  11.741 107.586  1.00  0.00           C
ATOM   4044 H24A CHL1C 464      14.699  11.706 108.078  1.00  0.00           H
ATOM   4045 H24B CHL1C 464      15.837  12.698 107.039  1.00  0.00           H
ATOM   4046  C25 CHL1C 464      15.773  10.579 106.614  1.00  0.00           C
ATOM   4047  H25 CHL1C 464      15.747   9.663 107.241  1.00  0.00           H
ATOM   4048  C26 CHL1C 464      14.558  10.614 105.714  1.00  0.00           C
ATOM   4049 H26A CHL1C 464      14.398   9.671 105.149  1.00  0.00           H
ATOM   4050 H26B CHL1C 464      13.764  10.656 106.489  1.00  0.00           H
ATOM   4051 H26C CHL1C 464      14.616  11.453 104.988  1.00  0.00           H
ATOM   4052  C27 CHL1C 464      17.053  10.446 105.775  1.00  0.00           C
ATOM   4053 H27A CHL1C 464      18.000  10.325 106.344  1.00  0.00           H
ATOM   4054 H27B CHL1C 464      16.914   9.489 105.227  1.00  0.00           H
ATOM   4055 H27C CHL1C 464      17.075  11.296 105.060  1.00  0.00           H
ATOM   4056  C3  CHL1D 465      16.372  33.976 120.638  1.00  0.00           C
ATOM   4057  H3  CHL1D 465      15.517  34.634 120.902  1.00  0.00           H
ATOM   4058  O3  CHL1D 465      16.809  33.557 121.950  1.00  0.00           O
ATOM   4059  H3' CHL1D 465      17.762  33.643 122.034  1.00  0.00           H
ATOM   4060  C4  CHL1D 465      16.062  32.681 119.910  1.00  0.00           C
ATOM   4061  H4A CHL1D 465      16.734  31.824 120.128  1.00  0.00           H
ATOM   4062  H4B CHL1D 465      15.148  32.283 120.399  1.00  0.00           H
ATOM   4063  C5  CHL1D 465      15.777  32.844 118.432  1.00  0.00           C
ATOM   4064  C6  CHL1D 465      14.670  32.255 117.858  1.00  0.00           C
ATOM   4065  H6  CHL1D 465      14.112  31.554 118.498  1.00  0.00           H
ATOM   4066  C7  CHL1D 465      14.314  32.320 116.411  1.00  0.00           C
ATOM   4067  H7A CHL1D 465      14.106  31.305 116.009  1.00  0.00           H
ATOM   4068  H7B CHL1D 465      13.435  32.988 116.285  1.00  0.00           H
ATOM   4069  C8  CHL1D 465      15.467  32.757 115.487  1.00  0.00           C
ATOM   4070  H8  CHL1D 465      16.078  31.829 115.496  1.00  0.00           H
ATOM   4071  C14 CHL1D 465      14.962  33.045 114.080  1.00  0.00           C
ATOM   4072  H14 CHL1D 465      14.202  33.833 114.269  1.00  0.00           H
ATOM   4073  C15 CHL1D 465      14.223  31.979 113.317  1.00  0.00           C
ATOM   4074 H15A CHL1D 465      14.684  30.970 113.383  1.00  0.00           H
ATOM   4075 H15B CHL1D 465      13.171  32.054 113.668  1.00  0.00           H
ATOM   4076  C16 CHL1D 465      14.291  32.500 111.859  1.00  0.00           C
ATOM   4077 H16A CHL1D 465      14.684  31.678 111.223  1.00  0.00           H
ATOM   4078 H16B CHL1D 465      13.257  32.646 111.478  1.00  0.00           H
ATOM   4079  C17 CHL1D 465      15.083  33.833 111.862  1.00  0.00           C
ATOM   4080  H17 CHL1D 465      14.321  34.597 112.127  1.00  0.00           H
ATOM   4081  C13 CHL1D 465      15.987  33.646 113.121  1.00  0.00           C
ATOM   4082  C18 CHL1D 465      17.148  32.700 112.870  1.00  0.00           C
ATOM   4083 H18A CHL1D 465      16.770  31.805 112.332  1.00  0.00           H
ATOM   4084 H18B CHL1D 465      17.980  33.150 112.287  1.00  0.00           H
ATOM   4085 H18C CHL1D 465      17.581  32.301 113.813  1.00  0.00           H
ATOM   4086  C12 CHL1D 465      16.603  34.872 113.739  1.00  0.00           C
ATOM   4087 H12A CHL1D 465      17.326  35.411 113.091  1.00  0.00           H
ATOM   4088 H12B CHL1D 465      15.817  35.623 113.970  1.00  0.00           H
ATOM   4089  C11 CHL1D 465      17.181  34.638 115.158  1.00  0.00           C
ATOM   4090 H11A CHL1D 465      18.092  34.003 115.126  1.00  0.00           H
ATOM   4091 H11B CHL1D 465      17.505  35.574 115.663  1.00  0.00           H
ATOM   4092  C9  CHL1D 465      16.151  33.977 116.093  1.00  0.00           C
ATOM   4093  H9  CHL1D 465      15.305  34.685 116.230  1.00  0.00           H
ATOM   4094  C10 CHL1D 465      16.776  33.682 117.582  1.00  0.00           C
ATOM   4095  C19 CHL1D 465      18.044  32.803 117.507  1.00  0.00           C
ATOM   4096 H19A CHL1D 465      18.468  32.503 118.489  1.00  0.00           H
ATOM   4097 H19B CHL1D 465      17.831  31.902 116.892  1.00  0.00           H
ATOM   4098 H19C CHL1D 465      18.922  33.265 117.007  1.00  0.00           H
ATOM   4099  C1  CHL1D 465      17.060  34.951 118.433  1.00  0.00           C
ATOM   4100  H1A CHL1D 465      17.743  35.583 117.824  1.00  0.00           H
ATOM   4101  H1B CHL1D 465      16.100  35.510 118.430  1.00  0.00           H
ATOM   4102  C2  CHL1D 465      17.426  34.760 119.877  1.00  0.00           C
ATOM   4103  H2A CHL1D 465      17.467  35.716 120.442  1.00  0.00           H
ATOM   4104  H2B CHL1D 465      18.375  34.182 119.873  1.00  0.00           H
ATOM   4105  C20 CHL1D 465      15.757  34.226 110.524  1.00  0.00           C
ATOM   4106  H20 CHL1D 465      16.624  34.911 110.641  1.00  0.00           H
ATOM   4107  C21 CHL1D 465      14.735  35.003 109.766  1.00  0.00           C
ATOM   4108 H21A CHL1D 465      15.092  35.382 108.784  1.00  0.00           H
ATOM   4109 H21B CHL1D 465      14.443  35.920 110.322  1.00  0.00           H
ATOM   4110 H21C CHL1D 465      13.887  34.335 109.506  1.00  0.00           H
ATOM   4111  C22 CHL1D 465      16.243  33.039 109.632  1.00  0.00           C
ATOM   4112 H22A CHL1D 465      16.761  32.300 110.280  1.00  0.00           H
ATOM   4113 H22B CHL1D 465      15.325  32.512 109.296  1.00  0.00           H
ATOM   4114  C23 CHL1D 465      17.182  33.388 108.502  1.00  0.00           C
ATOM   4115 H23A CHL1D 465      16.735  34.255 107.970  1.00  0.00           H
ATOM   4116 H23B CHL1D 465      18.133  33.717 108.973  1.00  0.00           H
ATOM   4117  C24 CHL1D 465      17.497  32.320 107.388  1.00  0.00           C
ATOM   4118 H24A CHL1D 465      18.421  32.645 106.865  1.00  0.00           H
ATOM   4119 H24B CHL1D 465      17.785  31.332 107.807  1.00  0.00           H
ATOM   4120  C25 CHL1D 465      16.309  32.081 106.520  1.00  0.00           C
ATOM   4121  H25 CHL1D 465      15.515  31.933 107.282  1.00  0.00           H
ATOM   4122  C26 CHL1D 465      16.004  33.322 105.726  1.00  0.00           C
ATOM   4123 H26A CHL1D 465      15.294  33.084 104.904  1.00  0.00           H
ATOM   4124 H26B CHL1D 465      15.542  34.099 106.372  1.00  0.00           H
ATOM   4125 H26C CHL1D 465      16.965  33.592 105.239  1.00  0.00           H
ATOM   4126  C27 CHL1D 465      16.452  30.804 105.766  1.00  0.00           C
ATOM   4127 H27A CHL1D 465      16.600  29.888 106.378  1.00  0.00           H
ATOM   4128 H27B CHL1D 465      15.603  30.786 105.050  1.00  0.00           H
ATOM   4129 H27C CHL1D 465      17.316  30.918 105.077  1.00  0.00           H
ATOM   4130  C3  CHL1E 466      37.593  36.939 117.494  1.00  0.00           C
ATOM   4131  H3  CHL1E 466      38.004  37.967 117.407  1.00  0.00           H
ATOM   4132  O3  CHL1E 466      37.761  36.380 118.793  1.00  0.00           O
ATOM   4133  H3' CHL1E 466      37.716  35.454 118.542  1.00  0.00           H
ATOM   4134  C4  CHL1E 466      36.151  36.783 117.119  1.00  0.00           C
ATOM   4135  H4A CHL1E 466      35.817  35.723 117.149  1.00  0.00           H
ATOM   4136  H4B CHL1E 466      35.442  37.307 117.794  1.00  0.00           H
ATOM   4137  C5  CHL1E 466      35.898  36.987 115.660  1.00  0.00           C
ATOM   4138  C6  CHL1E 466      35.015  37.912 115.275  1.00  0.00           C
ATOM   4139  H6  CHL1E 466      34.381  38.409 116.025  1.00  0.00           H
ATOM   4140  C7  CHL1E 466      34.691  38.147 113.796  1.00  0.00           C
ATOM   4141  H7A CHL1E 466      33.637  38.428 113.587  1.00  0.00           H
ATOM   4142  H7B CHL1E 466      35.253  39.046 113.463  1.00  0.00           H
ATOM   4143  C8  CHL1E 466      35.059  37.049 112.773  1.00  0.00           C
ATOM   4144  H8  CHL1E 466      34.324  36.224 112.883  1.00  0.00           H
ATOM   4145  C14 CHL1E 466      35.113  37.537 111.387  1.00  0.00           C
ATOM   4146  H14 CHL1E 466      35.786  38.421 111.395  1.00  0.00           H
ATOM   4147  C15 CHL1E 466      33.894  38.207 110.739  1.00  0.00           C
ATOM   4148 H15A CHL1E 466      32.927  37.696 110.930  1.00  0.00           H
ATOM   4149 H15B CHL1E 466      33.736  39.270 111.021  1.00  0.00           H
ATOM   4150  C16 CHL1E 466      34.124  38.077 109.196  1.00  0.00           C
ATOM   4151 H16A CHL1E 466      33.272  37.530 108.738  1.00  0.00           H
ATOM   4152 H16B CHL1E 466      34.176  39.080 108.720  1.00  0.00           H
ATOM   4153  C17 CHL1E 466      35.482  37.444 109.141  1.00  0.00           C
ATOM   4154  H17 CHL1E 466      36.213  38.280 109.156  1.00  0.00           H
ATOM   4155  C13 CHL1E 466      35.681  36.633 110.395  1.00  0.00           C
ATOM   4156  C18 CHL1E 466      34.847  35.326 110.308  1.00  0.00           C
ATOM   4157 H18A CHL1E 466      34.858  34.670 111.205  1.00  0.00           H
ATOM   4158 H18B CHL1E 466      33.812  35.546 109.968  1.00  0.00           H
ATOM   4159 H18C CHL1E 466      35.416  34.664 109.621  1.00  0.00           H
ATOM   4160  C12 CHL1E 466      37.160  36.407 110.811  1.00  0.00           C
ATOM   4161 H12A CHL1E 466      37.417  35.641 110.049  1.00  0.00           H
ATOM   4162 H12B CHL1E 466      37.864  37.241 110.603  1.00  0.00           H
ATOM   4163  C11 CHL1E 466      37.306  35.852 112.202  1.00  0.00           C
ATOM   4164 H11A CHL1E 466      37.032  34.776 112.210  1.00  0.00           H
ATOM   4165 H11B CHL1E 466      38.396  35.850 112.412  1.00  0.00           H
ATOM   4166  C9  CHL1E 466      36.508  36.674 113.196  1.00  0.00           C
ATOM   4167  H9  CHL1E 466      37.173  37.564 113.179  1.00  0.00           H
ATOM   4168  C10 CHL1E 466      36.724  36.163 114.672  1.00  0.00           C
ATOM   4169  C19 CHL1E 466      36.079  34.703 114.709  1.00  0.00           C
ATOM   4170 H19A CHL1E 466      34.997  34.635 114.468  1.00  0.00           H
ATOM   4171 H19B CHL1E 466      36.701  34.080 114.030  1.00  0.00           H
ATOM   4172 H19C CHL1E 466      36.202  34.310 115.741  1.00  0.00           H
ATOM   4173  C1  CHL1E 466      38.230  36.312 115.080  1.00  0.00           C
ATOM   4174  H1A CHL1E 466      38.788  35.568 114.472  1.00  0.00           H
ATOM   4175  H1B CHL1E 466      38.465  37.361 114.799  1.00  0.00           H
ATOM   4176  C2  CHL1E 466      38.468  36.032 116.598  1.00  0.00           C
ATOM   4177  H2A CHL1E 466      39.522  36.324 116.793  1.00  0.00           H
ATOM   4178  H2B CHL1E 466      38.383  34.927 116.681  1.00  0.00           H
ATOM   4179  C20 CHL1E 466      35.778  36.714 107.837  1.00  0.00           C
ATOM   4180  H20 CHL1E 466      36.606  36.004 108.047  1.00  0.00           H
ATOM   4181  C21 CHL1E 466      36.266  37.732 106.790  1.00  0.00           C
ATOM   4182 H21A CHL1E 466      35.592  38.614 106.756  1.00  0.00           H
ATOM   4183 H21B CHL1E 466      36.579  37.211 105.860  1.00  0.00           H
ATOM   4184 H21C CHL1E 466      37.155  38.260 107.196  1.00  0.00           H
ATOM   4185  C22 CHL1E 466      34.615  35.951 107.190  1.00  0.00           C
ATOM   4186 H22A CHL1E 466      33.900  35.611 107.970  1.00  0.00           H
ATOM   4187 H22B CHL1E 466      34.015  36.646 106.564  1.00  0.00           H
ATOM   4188  C23 CHL1E 466      35.032  34.740 106.287  1.00  0.00           C
ATOM   4189 H23A CHL1E 466      35.772  34.113 106.830  1.00  0.00           H
ATOM   4190 H23B CHL1E 466      35.521  35.273 105.445  1.00  0.00           H
ATOM   4191  C24 CHL1E 466      33.888  33.844 105.910  1.00  0.00           C
ATOM   4192 H24A CHL1E 466      33.443  33.428 106.838  1.00  0.00           H
ATOM   4193 H24B CHL1E 466      33.166  34.566 105.472  1.00  0.00           H
ATOM   4194  C25 CHL1E 466      34.256  32.729 104.962  1.00  0.00           C
ATOM   4195  H25 CHL1E 466      34.962  32.042 105.475  1.00  0.00           H
ATOM   4196  C26 CHL1E 466      32.996  31.927 104.706  1.00  0.00           C
ATOM   4197 H26A CHL1E 466      33.259  30.951 104.244  1.00  0.00           H
ATOM   4198 H26B CHL1E 466      32.440  31.678 105.635  1.00  0.00           H
ATOM   4199 H26C CHL1E 466      32.339  32.507 104.024  1.00  0.00           H
ATOM   4200  C27 CHL1E 466      34.801  33.141 103.635  1.00  0.00           C
ATOM   4201 H27A CHL1E 466      34.905  32.269 102.954  1.00  0.00           H
ATOM   4202 H27B CHL1E 466      34.102  33.947 103.326  1.00  0.00           H
ATOM   4203 H27C CHL1E 466      35.805  33.614 103.695  1.00  0.00           H
ATOM   4204  C3  CHL1F 467      35.102  59.140 122.863  1.00  0.00           C
ATOM   4205  H3  CHL1F 467      35.623  60.080 122.580  1.00  0.00           H
ATOM   4206  O3  CHL1F 467      34.430  59.073 124.110  1.00  0.00           O
ATOM   4207  H3' CHL1F 467      33.487  59.034 123.931  1.00  0.00           H
ATOM   4208  C4  CHL1F 467      33.952  58.897 121.677  1.00  0.00           C
ATOM   4209  H4A CHL1F 467      33.368  57.986 121.929  1.00  0.00           H
ATOM   4210  H4B CHL1F 467      33.354  59.831 121.728  1.00  0.00           H
ATOM   4211  C5  CHL1F 467      34.613  58.729 120.295  1.00  0.00           C
ATOM   4212  C6  CHL1F 467      34.329  59.528 119.286  1.00  0.00           C
ATOM   4213  H6  CHL1F 467      33.649  60.386 119.391  1.00  0.00           H
ATOM   4214  C7  CHL1F 467      34.877  59.402 117.847  1.00  0.00           C
ATOM   4215  H7A CHL1F 467      34.095  59.404 117.058  1.00  0.00           H
ATOM   4216  H7B CHL1F 467      35.609  60.210 117.635  1.00  0.00           H
ATOM   4217  C8  CHL1F 467      35.531  58.007 117.698  1.00  0.00           C
ATOM   4218  H8  CHL1F 467      34.705  57.270 117.796  1.00  0.00           H
ATOM   4219  C14 CHL1F 467      36.244  58.018 116.395  1.00  0.00           C
ATOM   4220  H14 CHL1F 467      36.977  58.849 116.475  1.00  0.00           H
ATOM   4221  C15 CHL1F 467      35.440  58.313 115.099  1.00  0.00           C
ATOM   4222 H15A CHL1F 467      34.511  57.716 114.975  1.00  0.00           H
ATOM   4223 H15B CHL1F 467      35.141  59.379 115.000  1.00  0.00           H
ATOM   4224  C16 CHL1F 467      36.479  57.956 114.051  1.00  0.00           C
ATOM   4225 H16A CHL1F 467      36.087  57.264 113.276  1.00  0.00           H
ATOM   4226 H16B CHL1F 467      36.790  58.912 113.577  1.00  0.00           H
ATOM   4227  C17 CHL1F 467      37.744  57.254 114.783  1.00  0.00           C
ATOM   4228  H17 CHL1F 467      38.494  58.070 114.855  1.00  0.00           H
ATOM   4229  C13 CHL1F 467      37.126  56.753 116.104  1.00  0.00           C
ATOM   4230  C18 CHL1F 467      36.167  55.542 115.883  1.00  0.00           C
ATOM   4231 H18A CHL1F 467      35.605  55.738 114.945  1.00  0.00           H
ATOM   4232 H18B CHL1F 467      36.840  54.680 115.686  1.00  0.00           H
ATOM   4233 H18C CHL1F 467      35.451  55.345 116.709  1.00  0.00           H
ATOM   4234  C12 CHL1F 467      38.116  56.475 117.266  1.00  0.00           C
ATOM   4235 H12A CHL1F 467      38.505  55.451 117.079  1.00  0.00           H
ATOM   4236 H12B CHL1F 467      38.860  57.300 117.235  1.00  0.00           H
ATOM   4237  C11 CHL1F 467      37.374  56.391 118.638  1.00  0.00           C
ATOM   4238 H11A CHL1F 467      36.817  55.430 118.627  1.00  0.00           H
ATOM   4239 H11B CHL1F 467      38.141  56.359 119.441  1.00  0.00           H
ATOM   4240  C9  CHL1F 467      36.468  57.634 118.852  1.00  0.00           C
ATOM   4241  H9  CHL1F 467      37.159  58.501 118.930  1.00  0.00           H
ATOM   4242  C10 CHL1F 467      35.722  57.673 120.202  1.00  0.00           C
ATOM   4243  C19 CHL1F 467      35.103  56.205 120.347  1.00  0.00           C
ATOM   4244 H19A CHL1F 467      34.615  55.764 119.452  1.00  0.00           H
ATOM   4245 H19B CHL1F 467      35.788  55.350 120.526  1.00  0.00           H
ATOM   4246 H19C CHL1F 467      34.417  56.222 121.221  1.00  0.00           H
ATOM   4247  C1  CHL1F 467      36.746  57.910 121.344  1.00  0.00           C
ATOM   4248  H1A CHL1F 467      37.486  57.081 121.319  1.00  0.00           H
ATOM   4249  H1B CHL1F 467      37.282  58.830 121.029  1.00  0.00           H
ATOM   4250  C2  CHL1F 467      36.109  58.024 122.723  1.00  0.00           C
ATOM   4251  H2A CHL1F 467      36.931  58.078 123.468  1.00  0.00           H
ATOM   4252  H2B CHL1F 467      35.661  57.041 122.986  1.00  0.00           H
ATOM   4253  C20 CHL1F 467      38.481  56.269 113.859  1.00  0.00           C
ATOM   4254  H20 CHL1F 467      37.846  55.391 113.611  1.00  0.00           H
ATOM   4255  C21 CHL1F 467      39.724  55.877 114.561  1.00  0.00           C
ATOM   4256 H21A CHL1F 467      40.194  56.767 115.031  1.00  0.00           H
ATOM   4257 H21B CHL1F 467      40.530  55.480 113.907  1.00  0.00           H
ATOM   4258 H21C CHL1F 467      39.577  55.038 115.275  1.00  0.00           H
ATOM   4259  C22 CHL1F 467      38.868  56.939 112.528  1.00  0.00           C
ATOM   4260 H22A CHL1F 467      38.607  58.018 112.568  1.00  0.00           H
ATOM   4261 H22B CHL1F 467      39.970  57.030 112.424  1.00  0.00           H
ATOM   4262  C23 CHL1F 467      38.348  56.445 111.180  1.00  0.00           C
ATOM   4263 H23A CHL1F 467      38.879  57.031 110.400  1.00  0.00           H
ATOM   4264 H23B CHL1F 467      38.693  55.398 111.039  1.00  0.00           H
ATOM   4265  C24 CHL1F 467      36.857  56.478 110.919  1.00  0.00           C
ATOM   4266 H24A CHL1F 467      36.324  55.844 111.659  1.00  0.00           H
ATOM   4267 H24B CHL1F 467      36.379  57.481 110.886  1.00  0.00           H
ATOM   4268  C25 CHL1F 467      36.507  55.951 109.471  1.00  0.00           C
ATOM   4269  H25 CHL1F 467      37.070  55.025 109.228  1.00  0.00           H
ATOM   4270  C26 CHL1F 467      35.009  55.690 109.223  1.00  0.00           C
ATOM   4271 H26A CHL1F 467      34.801  55.229 108.234  1.00  0.00           H
ATOM   4272 H26B CHL1F 467      34.710  55.016 110.055  1.00  0.00           H
ATOM   4273 H26C CHL1F 467      34.402  56.609 109.364  1.00  0.00           H
ATOM   4274  C27 CHL1F 467      37.084  56.906 108.304  1.00  0.00           C
ATOM   4275 H27A CHL1F 467      36.538  57.868 108.409  1.00  0.00           H
ATOM   4276 H27B CHL1F 467      38.178  57.102 108.321  1.00  0.00           H
ATOM   4277 H27C CHL1F 467      36.829  56.535 107.289  1.00  0.00           H
ATOM   4278  C3  CHL1G 468      67.346  32.461 125.414  1.00  0.00           C
ATOM   4279  H3  CHL1G 468      66.360  32.962 125.315  1.00  0.00           H
ATOM   4280  O3  CHL1G 468      67.718  32.384 126.817  1.00  0.00           O
ATOM   4281  H3' CHL1G 468      68.587  32.002 126.676  1.00  0.00           H
ATOM   4282  C4  CHL1G 468      67.434  31.054 124.854  1.00  0.00           C
ATOM   4283  H4A CHL1G 468      68.328  30.525 125.248  1.00  0.00           H
ATOM   4284  H4B CHL1G 468      66.590  30.451 125.252  1.00  0.00           H
ATOM   4285  C5  CHL1G 468      67.438  31.110 123.259  1.00  0.00           C
ATOM   4286  C6  CHL1G 468      66.498  30.261 122.662  1.00  0.00           C
ATOM   4287  H6  CHL1G 468      65.797  29.703 123.301  1.00  0.00           H
ATOM   4288  C7  CHL1G 468      66.516  30.054 121.174  1.00  0.00           C
ATOM   4289  H7A CHL1G 468      66.615  28.960 121.005  1.00  0.00           H
ATOM   4290  H7B CHL1G 468      65.541  30.335 120.721  1.00  0.00           H
ATOM   4291  C8  CHL1G 468      67.615  30.904 120.344  1.00  0.00           C
ATOM   4292  H8  CHL1G 468      68.559  30.319 120.314  1.00  0.00           H
ATOM   4293  C14 CHL1G 468      67.202  31.091 118.904  1.00  0.00           C
ATOM   4294  H14 CHL1G 468      66.227  31.617 118.985  1.00  0.00           H
ATOM   4295  C15 CHL1G 468      67.092  29.774 118.099  1.00  0.00           C
ATOM   4296 H15A CHL1G 468      67.784  28.951 118.378  1.00  0.00           H
ATOM   4297 H15B CHL1G 468      66.063  29.406 118.299  1.00  0.00           H
ATOM   4298  C16 CHL1G 468      67.272  30.159 116.664  1.00  0.00           C
ATOM   4299 H16A CHL1G 468      68.165  29.714 116.174  1.00  0.00           H
ATOM   4300 H16B CHL1G 468      66.375  30.040 116.019  1.00  0.00           H
ATOM   4301  C17 CHL1G 468      67.409  31.756 116.744  1.00  0.00           C
ATOM   4302  H17 CHL1G 468      66.370  32.148 116.784  1.00  0.00           H
ATOM   4303  C13 CHL1G 468      68.047  32.103 118.093  1.00  0.00           C
ATOM   4304  C18 CHL1G 468      69.517  31.616 118.017  1.00  0.00           C
ATOM   4305 H18A CHL1G 468      69.608  30.754 117.322  1.00  0.00           H
ATOM   4306 H18B CHL1G 468      70.171  32.462 117.716  1.00  0.00           H
ATOM   4307 H18C CHL1G 468      69.895  31.189 118.971  1.00  0.00           H
ATOM   4308  C12 CHL1G 468      67.933  33.434 118.743  1.00  0.00           C
ATOM   4309 H12A CHL1G 468      68.427  34.137 118.038  1.00  0.00           H
ATOM   4310 H12B CHL1G 468      66.867  33.743 118.783  1.00  0.00           H
ATOM   4311  C11 CHL1G 468      68.584  33.349 120.148  1.00  0.00           C
ATOM   4312 H11A CHL1G 468      69.665  33.095 120.117  1.00  0.00           H
ATOM   4313 H11B CHL1G 468      68.431  34.348 120.610  1.00  0.00           H
ATOM   4314  C9  CHL1G 468      67.806  32.292 121.000  1.00  0.00           C
ATOM   4315  H9  CHL1G 468      66.786  32.730 120.966  1.00  0.00           H
ATOM   4316  C10 CHL1G 468      68.260  32.132 122.506  1.00  0.00           C
ATOM   4317  C19 CHL1G 468      69.676  31.605 122.557  1.00  0.00           C
ATOM   4318 H19A CHL1G 468      70.293  32.462 122.212  1.00  0.00           H
ATOM   4319 H19B CHL1G 468      69.957  31.272 123.579  1.00  0.00           H
ATOM   4320 H19C CHL1G 468      69.832  30.775 121.835  1.00  0.00           H
ATOM   4321  C1  CHL1G 468      68.058  33.500 123.206  1.00  0.00           C
ATOM   4322  H1A CHL1G 468      68.656  34.299 122.719  1.00  0.00           H
ATOM   4323  H1B CHL1G 468      66.989  33.735 123.015  1.00  0.00           H
ATOM   4324  C2  CHL1G 468      68.428  33.435 124.687  1.00  0.00           C
ATOM   4325  H2A CHL1G 468      68.401  34.354 125.311  1.00  0.00           H
ATOM   4326  H2B CHL1G 468      69.470  33.052 124.745  1.00  0.00           H
ATOM   4327  C20 CHL1G 468      67.917  32.510 115.497  1.00  0.00           C
ATOM   4328  H20 CHL1G 468      69.027  32.561 115.506  1.00  0.00           H
ATOM   4329  C21 CHL1G 468      67.362  33.952 115.378  1.00  0.00           C
ATOM   4330 H21A CHL1G 468      67.934  34.606 116.071  1.00  0.00           H
ATOM   4331 H21B CHL1G 468      66.270  33.961 115.579  1.00  0.00           H
ATOM   4332 H21C CHL1G 468      67.476  34.302 114.330  1.00  0.00           H
ATOM   4333  C22 CHL1G 468      67.765  31.787 114.044  1.00  0.00           C
ATOM   4334 H22A CHL1G 468      68.262  32.453 113.306  1.00  0.00           H
ATOM   4335 H22B CHL1G 468      68.360  30.850 114.083  1.00  0.00           H
ATOM   4336  C23 CHL1G 468      66.306  31.653 113.572  1.00  0.00           C
ATOM   4337 H23A CHL1G 468      65.822  30.760 114.022  1.00  0.00           H
ATOM   4338 H23B CHL1G 468      65.743  32.555 113.893  1.00  0.00           H
ATOM   4339  C24 CHL1G 468      66.137  31.584 111.989  1.00  0.00           C
ATOM   4340 H24A CHL1G 468      65.139  31.246 111.638  1.00  0.00           H
ATOM   4341 H24B CHL1G 468      66.561  32.536 111.602  1.00  0.00           H
ATOM   4342  C25 CHL1G 468      67.097  30.454 111.391  1.00  0.00           C
ATOM   4343  H25 CHL1G 468      68.072  30.384 111.919  1.00  0.00           H
ATOM   4344  C26 CHL1G 468      66.437  29.045 111.461  1.00  0.00           C
ATOM   4345 H26A CHL1G 468      66.034  28.867 112.481  1.00  0.00           H
ATOM   4346 H26B CHL1G 468      65.591  28.955 110.746  1.00  0.00           H
ATOM   4347 H26C CHL1G 468      67.183  28.234 111.318  1.00  0.00           H
ATOM   4348  C27 CHL1G 468      67.388  30.674 109.903  1.00  0.00           C
ATOM   4349 H27A CHL1G 468      66.484  30.378 109.331  1.00  0.00           H
ATOM   4350 H27B CHL1G 468      67.622  31.733 109.659  1.00  0.00           H
ATOM   4351 H27C CHL1G 468      68.203  30.015 109.535  1.00  0.00           H
ATOM   4352  C3  CHL1H 469      13.532   4.451 120.337  1.00  0.00           C
ATOM   4353  H3  CHL1H 469      13.470   5.521 120.044  1.00  0.00           H
ATOM   4354  O3  CHL1H 469      13.681   4.349 121.736  1.00  0.00           O
ATOM   4355  H3' CHL1H 469      14.623   4.506 121.836  1.00  0.00           H
ATOM   4356  C4  CHL1H 469      12.246   3.645 119.874  1.00  0.00           C
ATOM   4357  H4A CHL1H 469      12.403   2.621 120.274  1.00  0.00           H
ATOM   4358  H4B CHL1H 469      11.458   4.170 120.456  1.00  0.00           H
ATOM   4359  C5  CHL1H 469      11.937   3.785 118.320  1.00  0.00           C
ATOM   4360  C6  CHL1H 469      10.801   4.243 117.785  1.00  0.00           C
ATOM   4361  H6  CHL1H 469       9.991   4.504 118.482  1.00  0.00           H
ATOM   4362  C7  CHL1H 469      10.555   4.505 116.327  1.00  0.00           C
ATOM   4363  H7A CHL1H 469       9.553   4.242 115.925  1.00  0.00           H
ATOM   4364  H7B CHL1H 469      10.854   5.556 116.124  1.00  0.00           H
ATOM   4365  C8  CHL1H 469      11.654   3.762 115.489  1.00  0.00           C
ATOM   4366  H8  CHL1H 469      11.392   2.690 115.620  1.00  0.00           H
ATOM   4367  C14 CHL1H 469      11.597   4.100 113.933  1.00  0.00           C
ATOM   4368  H14 CHL1H 469      11.655   5.205 113.830  1.00  0.00           H
ATOM   4369  C15 CHL1H 469      10.227   3.851 113.274  1.00  0.00           C
ATOM   4370 H15A CHL1H 469       9.926   2.782 113.289  1.00  0.00           H
ATOM   4371 H15B CHL1H 469       9.518   4.611 113.666  1.00  0.00           H
ATOM   4372  C16 CHL1H 469      10.596   3.913 111.754  1.00  0.00           C
ATOM   4373 H16A CHL1H 469      10.252   3.025 111.181  1.00  0.00           H
ATOM   4374 H16B CHL1H 469      10.233   4.878 111.340  1.00  0.00           H
ATOM   4375  C17 CHL1H 469      12.166   4.058 111.677  1.00  0.00           C
ATOM   4376  H17 CHL1H 469      12.442   5.134 111.704  1.00  0.00           H
ATOM   4377  C13 CHL1H 469      12.634   3.493 113.090  1.00  0.00           C
ATOM   4378  C18 CHL1H 469      12.570   1.875 113.047  1.00  0.00           C
ATOM   4379 H18A CHL1H 469      13.480   1.569 112.488  1.00  0.00           H
ATOM   4380 H18B CHL1H 469      12.504   1.457 114.074  1.00  0.00           H
ATOM   4381 H18C CHL1H 469      11.711   1.560 112.417  1.00  0.00           H
ATOM   4382  C12 CHL1H 469      14.026   3.970 113.670  1.00  0.00           C
ATOM   4383 H12A CHL1H 469      14.852   3.603 113.024  1.00  0.00           H
ATOM   4384 H12B CHL1H 469      14.031   5.079 113.607  1.00  0.00           H
ATOM   4385  C11 CHL1H 469      14.241   3.570 115.090  1.00  0.00           C
ATOM   4386 H11A CHL1H 469      14.384   2.470 115.027  1.00  0.00           H
ATOM   4387 H11B CHL1H 469      15.168   4.075 115.438  1.00  0.00           H
ATOM   4388  C9  CHL1H 469      13.104   4.015 116.059  1.00  0.00           C
ATOM   4389  H9  CHL1H 469      13.347   5.099 116.056  1.00  0.00           H
ATOM   4390  C10 CHL1H 469      13.243   3.522 117.498  1.00  0.00           C
ATOM   4391  C19 CHL1H 469      13.502   2.019 117.482  1.00  0.00           C
ATOM   4392 H19A CHL1H 469      13.332   1.583 118.490  1.00  0.00           H
ATOM   4393 H19B CHL1H 469      12.876   1.455 116.758  1.00  0.00           H
ATOM   4394 H19C CHL1H 469      14.570   1.771 117.303  1.00  0.00           H
ATOM   4395  C1  CHL1H 469      14.547   4.163 118.157  1.00  0.00           C
ATOM   4396  H1A CHL1H 469      15.431   3.679 117.691  1.00  0.00           H
ATOM   4397  H1B CHL1H 469      14.619   5.235 117.873  1.00  0.00           H
ATOM   4398  C2  CHL1H 469      14.780   3.880 119.615  1.00  0.00           C
ATOM   4399  H2A CHL1H 469      15.739   4.359 119.906  1.00  0.00           H
ATOM   4400  H2B CHL1H 469      14.804   2.808 119.908  1.00  0.00           H
ATOM   4401  C20 CHL1H 469      12.716   3.466 110.368  1.00  0.00           C
ATOM   4402  H20 CHL1H 469      12.417   2.398 110.301  1.00  0.00           H
ATOM   4403  C21 CHL1H 469      14.243   3.636 110.297  1.00  0.00           C
ATOM   4404 H21A CHL1H 469      14.385   4.708 110.551  1.00  0.00           H
ATOM   4405 H21B CHL1H 469      14.526   3.467 109.237  1.00  0.00           H
ATOM   4406 H21C CHL1H 469      14.753   3.078 111.111  1.00  0.00           H
ATOM   4407  C22 CHL1H 469      12.025   4.029 109.075  1.00  0.00           C
ATOM   4408 H22A CHL1H 469      10.918   3.950 109.124  1.00  0.00           H
ATOM   4409 H22B CHL1H 469      12.273   5.104 108.947  1.00  0.00           H
ATOM   4410  C23 CHL1H 469      12.309   3.292 107.753  1.00  0.00           C
ATOM   4411 H23A CHL1H 469      13.373   3.439 107.469  1.00  0.00           H
ATOM   4412 H23B CHL1H 469      12.240   2.209 107.988  1.00  0.00           H
ATOM   4413  C24 CHL1H 469      11.493   3.838 106.586  1.00  0.00           C
ATOM   4414 H24A CHL1H 469      10.431   3.646 106.848  1.00  0.00           H
ATOM   4415 H24B CHL1H 469      11.587   4.910 106.312  1.00  0.00           H
ATOM   4416  C25 CHL1H 469      11.525   3.015 105.252  1.00  0.00           C
ATOM   4417  H25 CHL1H 469      12.581   2.910 104.923  1.00  0.00           H
ATOM   4418  C26 CHL1H 469      10.931   1.622 105.577  1.00  0.00           C
ATOM   4419 H26A CHL1H 469       9.891   1.674 105.965  1.00  0.00           H
ATOM   4420 H26B CHL1H 469      10.800   1.008 104.661  1.00  0.00           H
ATOM   4421 H26C CHL1H 469      11.513   1.147 106.396  1.00  0.00           H
ATOM   4422  C27 CHL1H 469      10.835   3.740 104.103  1.00  0.00           C
ATOM   4423 H27A CHL1H 469      10.989   3.153 103.172  1.00  0.00           H
ATOM   4424 H27B CHL1H 469      11.280   4.733 103.880  1.00  0.00           H
ATOM   4425 H27C CHL1H 469       9.760   3.849 104.358  1.00  0.00           H
ATOM   4426  C3  CHL1I 470       5.645  72.504 123.248  1.00  0.00           C
ATOM   4427  H3  CHL1I 470       5.421  71.428 123.410  1.00  0.00           H
ATOM   4428  O3  CHL1I 470       5.611  72.953 124.610  1.00  0.00           O
ATOM   4429  H3' CHL1I 470       4.750  72.716 124.963  1.00  0.00           H
ATOM   4430  C4  CHL1I 470       7.036  72.616 122.600  1.00  0.00           C
ATOM   4431  H4A CHL1I 470       7.341  73.679 122.700  1.00  0.00           H
ATOM   4432  H4B CHL1I 470       7.628  71.910 123.222  1.00  0.00           H
ATOM   4433  C5  CHL1I 470       7.096  72.193 121.154  1.00  0.00           C
ATOM   4434  C6  CHL1I 470       7.994  71.253 120.822  1.00  0.00           C
ATOM   4435  H6  CHL1I 470       8.528  70.792 121.665  1.00  0.00           H
ATOM   4436  C7  CHL1I 470       8.030  70.772 119.415  1.00  0.00           C
ATOM   4437  H7A CHL1I 470       9.112  70.804 119.166  1.00  0.00           H
ATOM   4438  H7B CHL1I 470       7.541  69.774 119.393  1.00  0.00           H
ATOM   4439  C8  CHL1I 470       7.225  71.576 118.370  1.00  0.00           C
ATOM   4440  H8  CHL1I 470       7.816  72.491 118.151  1.00  0.00           H
ATOM   4441  C14 CHL1I 470       7.016  70.766 117.041  1.00  0.00           C
ATOM   4442  H14 CHL1I 470       6.356  69.933 117.366  1.00  0.00           H
ATOM   4443  C15 CHL1I 470       8.145  70.077 116.436  1.00  0.00           C
ATOM   4444 H15A CHL1I 470       9.103  70.636 116.384  1.00  0.00           H
ATOM   4445 H15B CHL1I 470       8.334  69.171 117.051  1.00  0.00           H
ATOM   4446  C16 CHL1I 470       7.567  69.567 115.152  1.00  0.00           C
ATOM   4447 H16A CHL1I 470       8.356  69.761 114.394  1.00  0.00           H
ATOM   4448 H16B CHL1I 470       7.396  68.470 115.127  1.00  0.00           H
ATOM   4449  C17 CHL1I 470       6.307  70.370 114.845  1.00  0.00           C
ATOM   4450  H17 CHL1I 470       5.517  69.650 115.146  1.00  0.00           H
ATOM   4451  C13 CHL1I 470       6.266  71.495 115.924  1.00  0.00           C
ATOM   4452  C18 CHL1I 470       7.149  72.669 115.418  1.00  0.00           C
ATOM   4453 H18A CHL1I 470       7.491  73.364 116.215  1.00  0.00           H
ATOM   4454 H18B CHL1I 470       8.069  72.268 114.940  1.00  0.00           H
ATOM   4455 H18C CHL1I 470       6.676  73.347 114.675  1.00  0.00           H
ATOM   4456  C12 CHL1I 470       4.926  72.004 116.544  1.00  0.00           C
ATOM   4457 H12A CHL1I 470       4.463  72.742 115.855  1.00  0.00           H
ATOM   4458 H12B CHL1I 470       4.215  71.162 116.687  1.00  0.00           H
ATOM   4459  C11 CHL1I 470       5.068  72.767 117.859  1.00  0.00           C
ATOM   4460 H11A CHL1I 470       5.573  73.713 117.568  1.00  0.00           H
ATOM   4461 H11B CHL1I 470       4.084  73.106 118.249  1.00  0.00           H
ATOM   4462  C9  CHL1I 470       5.888  72.055 118.930  1.00  0.00           C
ATOM   4463  H9  CHL1I 470       5.302  71.127 119.099  1.00  0.00           H
ATOM   4464  C10 CHL1I 470       5.995  72.806 120.244  1.00  0.00           C
ATOM   4465  C19 CHL1I 470       6.535  74.219 119.886  1.00  0.00           C
ATOM   4466 H19A CHL1I 470       5.920  74.916 119.277  1.00  0.00           H
ATOM   4467 H19B CHL1I 470       6.802  74.771 120.813  1.00  0.00           H
ATOM   4468 H19C CHL1I 470       7.503  74.114 119.351  1.00  0.00           H
ATOM   4469  C1  CHL1I 470       4.612  72.877 120.979  1.00  0.00           C
ATOM   4470  H1A CHL1I 470       3.940  73.628 120.512  1.00  0.00           H
ATOM   4471  H1B CHL1I 470       4.126  71.883 120.884  1.00  0.00           H
ATOM   4472  C2  CHL1I 470       4.540  73.244 122.442  1.00  0.00           C
ATOM   4473  H2A CHL1I 470       3.556  72.972 122.881  1.00  0.00           H
ATOM   4474  H2B CHL1I 470       4.759  74.333 122.457  1.00  0.00           H
ATOM   4475  C20 CHL1I 470       5.960  70.681 113.360  1.00  0.00           C
ATOM   4476  H20 CHL1I 470       6.573  71.533 112.996  1.00  0.00           H
ATOM   4477  C21 CHL1I 470       4.546  71.164 113.381  1.00  0.00           C
ATOM   4478 H21A CHL1I 470       4.484  72.154 113.882  1.00  0.00           H
ATOM   4479 H21B CHL1I 470       3.881  70.475 113.944  1.00  0.00           H
ATOM   4480 H21C CHL1I 470       4.061  71.236 112.384  1.00  0.00           H
ATOM   4481  C22 CHL1I 470       6.264  69.489 112.392  1.00  0.00           C
ATOM   4482 H22A CHL1I 470       7.355  69.276 112.399  1.00  0.00           H
ATOM   4483 H22B CHL1I 470       5.745  68.571 112.742  1.00  0.00           H
ATOM   4484  C23 CHL1I 470       6.037  69.811 110.931  1.00  0.00           C
ATOM   4485 H23A CHL1I 470       5.002  70.206 110.842  1.00  0.00           H
ATOM   4486 H23B CHL1I 470       6.710  70.652 110.660  1.00  0.00           H
ATOM   4487  C24 CHL1I 470       6.120  68.652 109.958  1.00  0.00           C
ATOM   4488 H24A CHL1I 470       7.186  68.401 109.772  1.00  0.00           H
ATOM   4489 H24B CHL1I 470       5.694  67.813 110.549  1.00  0.00           H
ATOM   4490  C25 CHL1I 470       5.407  68.771 108.586  1.00  0.00           C
ATOM   4491  H25 CHL1I 470       4.334  68.935 108.822  1.00  0.00           H
ATOM   4492  C26 CHL1I 470       5.987  69.921 107.830  1.00  0.00           C
ATOM   4493 H26A CHL1I 470       5.574  69.933 106.799  1.00  0.00           H
ATOM   4494 H26B CHL1I 470       5.898  70.905 108.337  1.00  0.00           H
ATOM   4495 H26C CHL1I 470       7.069  69.740 107.658  1.00  0.00           H
ATOM   4496  C27 CHL1I 470       5.452  67.521 107.718  1.00  0.00           C
ATOM   4497 H27A CHL1I 470       4.963  66.613 108.132  1.00  0.00           H
ATOM   4498 H27B CHL1I 470       5.121  67.684 106.671  1.00  0.00           H
ATOM   4499 H27C CHL1I 470       6.498  67.209 107.508  1.00  0.00           H
ATOM   4500  C3  CHL1J 471      26.752  37.203 121.350  1.00  0.00           C
ATOM   4501  H3  CHL1J 471      27.829  37.048 121.124  1.00  0.00           H
ATOM   4502  O3  CHL1J 471      26.563  37.019 122.755  1.00  0.00           O
ATOM   4503  H3' CHL1J 471      25.655  37.280 122.925  1.00  0.00           H
ATOM   4504  C4  CHL1J 471      26.479  38.668 120.967  1.00  0.00           C
ATOM   4505  H4A CHL1J 471      25.468  38.784 121.413  1.00  0.00           H
ATOM   4506  H4B CHL1J 471      27.139  39.409 121.468  1.00  0.00           H
ATOM   4507  C5  CHL1J 471      26.378  38.875 119.464  1.00  0.00           C
ATOM   4508  C6  CHL1J 471      27.015  39.942 118.997  1.00  0.00           C
ATOM   4509  H6  CHL1J 471      27.517  40.662 119.661  1.00  0.00           H
ATOM   4510  C7  CHL1J 471      27.119  40.138 117.513  1.00  0.00           C
ATOM   4511  H7A CHL1J 471      26.942  41.213 117.294  1.00  0.00           H
ATOM   4512  H7B CHL1J 471      28.168  39.981 117.182  1.00  0.00           H
ATOM   4513  C8  CHL1J 471      26.034  39.376 116.730  1.00  0.00           C
ATOM   4514  H8  CHL1J 471      25.081  39.914 116.923  1.00  0.00           H
ATOM   4515  C14 CHL1J 471      26.458  39.437 115.234  1.00  0.00           C
ATOM   4516  H14 CHL1J 471      27.368  38.809 115.119  1.00  0.00           H
ATOM   4517  C15 CHL1J 471      26.663  40.768 114.577  1.00  0.00           C
ATOM   4518 H15A CHL1J 471      26.135  41.626 115.045  1.00  0.00           H
ATOM   4519 H15B CHL1J 471      27.756  40.917 114.711  1.00  0.00           H
ATOM   4520  C16 CHL1J 471      26.351  40.529 113.127  1.00  0.00           C
ATOM   4521 H16A CHL1J 471      25.389  41.049 112.932  1.00  0.00           H
ATOM   4522 H16B CHL1J 471      27.187  40.823 112.457  1.00  0.00           H
ATOM   4523  C17 CHL1J 471      25.958  39.001 112.978  1.00  0.00           C
ATOM   4524  H17 CHL1J 471      26.884  38.394 112.883  1.00  0.00           H
ATOM   4525  C13 CHL1J 471      25.326  38.709 114.419  1.00  0.00           C
ATOM   4526  C18 CHL1J 471      23.861  39.305 114.594  1.00  0.00           C
ATOM   4527 H18A CHL1J 471      23.081  38.887 113.922  1.00  0.00           H
ATOM   4528 H18B CHL1J 471      23.449  39.030 115.588  1.00  0.00           H
ATOM   4529 H18C CHL1J 471      23.854  40.416 114.568  1.00  0.00           H
ATOM   4530  C12 CHL1J 471      25.429  37.240 114.790  1.00  0.00           C
ATOM   4531 H12A CHL1J 471      24.651  36.732 114.181  1.00  0.00           H
ATOM   4532 H12B CHL1J 471      26.401  36.779 114.514  1.00  0.00           H
ATOM   4533  C11 CHL1J 471      25.077  36.975 116.245  1.00  0.00           C
ATOM   4534 H11A CHL1J 471      23.985  37.062 116.429  1.00  0.00           H
ATOM   4535 H11B CHL1J 471      25.457  35.952 116.454  1.00  0.00           H
ATOM   4536  C9  CHL1J 471      25.919  37.874 117.186  1.00  0.00           C
ATOM   4537  H9  CHL1J 471      26.982  37.582 117.048  1.00  0.00           H
ATOM   4538  C10 CHL1J 471      25.641  37.782 118.720  1.00  0.00           C
ATOM   4539  C19 CHL1J 471      24.127  38.044 118.850  1.00  0.00           C
ATOM   4540 H19A CHL1J 471      23.586  37.180 118.410  1.00  0.00           H
ATOM   4541 H19B CHL1J 471      23.797  38.150 119.905  1.00  0.00           H
ATOM   4542 H19C CHL1J 471      23.764  38.923 118.274  1.00  0.00           H
ATOM   4543  C1  CHL1J 471      25.973  36.421 119.215  1.00  0.00           C
ATOM   4544  H1A CHL1J 471      25.244  35.683 118.818  1.00  0.00           H
ATOM   4545  H1B CHL1J 471      26.946  36.078 118.805  1.00  0.00           H
ATOM   4546  C2  CHL1J 471      25.901  36.086 120.686  1.00  0.00           C
ATOM   4547  H2A CHL1J 471      26.552  35.192 120.789  1.00  0.00           H
ATOM   4548  H2B CHL1J 471      24.888  35.855 121.079  1.00  0.00           H
ATOM   4549  C20 CHL1J 471      25.083  38.957 111.707  1.00  0.00           C
ATOM   4550  H20 CHL1J 471      24.145  39.520 111.903  1.00  0.00           H
ATOM   4551  C21 CHL1J 471      24.440  37.545 111.601  1.00  0.00           C
ATOM   4552 H21A CHL1J 471      23.741  37.466 110.741  1.00  0.00           H
ATOM   4553 H21B CHL1J 471      23.848  37.289 112.505  1.00  0.00           H
ATOM   4554 H21C CHL1J 471      25.284  36.824 111.548  1.00  0.00           H
ATOM   4555  C22 CHL1J 471      25.814  39.462 110.473  1.00  0.00           C
ATOM   4556 H22A CHL1J 471      25.971  40.561 110.465  1.00  0.00           H
ATOM   4557 H22B CHL1J 471      26.833  39.033 110.360  1.00  0.00           H
ATOM   4558  C23 CHL1J 471      25.040  39.193 109.072  1.00  0.00           C
ATOM   4559 H23A CHL1J 471      24.992  38.099 108.881  1.00  0.00           H
ATOM   4560 H23B CHL1J 471      24.032  39.656 109.006  1.00  0.00           H
ATOM   4561  C24 CHL1J 471      25.881  39.705 107.911  1.00  0.00           C
ATOM   4562 H24A CHL1J 471      26.144  40.783 107.973  1.00  0.00           H
ATOM   4563 H24B CHL1J 471      26.800  39.108 107.731  1.00  0.00           H
ATOM   4564  C25 CHL1J 471      25.039  39.536 106.651  1.00  0.00           C
ATOM   4565  H25 CHL1J 471      24.226  40.293 106.659  1.00  0.00           H
ATOM   4566  C26 CHL1J 471      25.846  39.876 105.380  1.00  0.00           C
ATOM   4567 H26A CHL1J 471      26.664  40.609 105.551  1.00  0.00           H
ATOM   4568 H26B CHL1J 471      26.303  38.923 105.038  1.00  0.00           H
ATOM   4569 H26C CHL1J 471      25.139  40.201 104.587  1.00  0.00           H
ATOM   4570  C27 CHL1J 471      24.451  38.133 106.514  1.00  0.00           C
ATOM   4571 H27A CHL1J 471      23.616  38.032 107.240  1.00  0.00           H
ATOM   4572 H27B CHL1J 471      23.928  38.072 105.536  1.00  0.00           H
ATOM   4573 H27C CHL1J 471      25.223  37.347 106.660  1.00  0.00           H
ATOM   4574  C3  CHL1K 472       5.668  42.945 120.494  1.00  0.00           C
ATOM   4575  H3  CHL1K 472       6.705  42.635 120.244  1.00  0.00           H
ATOM   4576  O3  CHL1K 472       5.762  43.519 121.850  1.00  0.00           O
ATOM   4577  H3' CHL1K 472       4.862  43.832 121.968  1.00  0.00           H
ATOM   4578  C4  CHL1K 472       5.301  44.081 119.487  1.00  0.00           C
ATOM   4579  H4A CHL1K 472       4.484  44.573 120.058  1.00  0.00           H
ATOM   4580  H4B CHL1K 472       6.113  44.824 119.332  1.00  0.00           H
ATOM   4581  C5  CHL1K 472       4.837  43.509 118.124  1.00  0.00           C
ATOM   4582  C6  CHL1K 472       5.420  43.965 116.973  1.00  0.00           C
ATOM   4583  H6  CHL1K 472       6.202  44.738 117.000  1.00  0.00           H
ATOM   4584  C7  CHL1K 472       5.000  43.542 115.563  1.00  0.00           C
ATOM   4585  H7A CHL1K 472       4.745  44.376 114.874  1.00  0.00           H
ATOM   4586  H7B CHL1K 472       5.791  42.870 115.168  1.00  0.00           H
ATOM   4587  C8  CHL1K 472       3.625  42.691 115.643  1.00  0.00           C
ATOM   4588  H8  CHL1K 472       2.770  43.397 115.709  1.00  0.00           H
ATOM   4589  C14 CHL1K 472       3.475  41.872 114.319  1.00  0.00           C
ATOM   4590  H14 CHL1K 472       4.227  41.059 114.411  1.00  0.00           H
ATOM   4591  C15 CHL1K 472       3.758  42.639 113.006  1.00  0.00           C
ATOM   4592 H15A CHL1K 472       3.273  43.635 113.094  1.00  0.00           H
ATOM   4593 H15B CHL1K 472       4.821  42.782 112.717  1.00  0.00           H
ATOM   4594  C16 CHL1K 472       3.057  41.766 111.930  1.00  0.00           C
ATOM   4595 H16A CHL1K 472       2.338  42.402 111.371  1.00  0.00           H
ATOM   4596 H16B CHL1K 472       3.780  41.260 111.255  1.00  0.00           H
ATOM   4597  C17 CHL1K 472       2.232  40.609 112.656  1.00  0.00           C
ATOM   4598  H17 CHL1K 472       2.938  39.754 112.589  1.00  0.00           H
ATOM   4599  C13 CHL1K 472       2.182  41.104 114.124  1.00  0.00           C
ATOM   4600  C18 CHL1K 472       1.052  42.173 114.166  1.00  0.00           C
ATOM   4601 H18A CHL1K 472       1.048  42.719 115.134  1.00  0.00           H
ATOM   4602 H18B CHL1K 472       1.138  42.972 113.399  1.00  0.00           H
ATOM   4603 H18C CHL1K 472       0.026  41.782 113.993  1.00  0.00           H
ATOM   4604  C12 CHL1K 472       2.062  40.094 115.285  1.00  0.00           C
ATOM   4605 H12A CHL1K 472       1.084  39.567 115.309  1.00  0.00           H
ATOM   4606 H12B CHL1K 472       2.743  39.269 114.984  1.00  0.00           H
ATOM   4607  C11 CHL1K 472       2.372  40.673 116.692  1.00  0.00           C
ATOM   4608 H11A CHL1K 472       1.467  41.240 116.997  1.00  0.00           H
ATOM   4609 H11B CHL1K 472       2.545  39.800 117.357  1.00  0.00           H
ATOM   4610  C9  CHL1K 472       3.598  41.622 116.772  1.00  0.00           C
ATOM   4611  H9  CHL1K 472       4.476  40.948 116.675  1.00  0.00           H
ATOM   4612  C10 CHL1K 472       3.787  42.397 118.141  1.00  0.00           C
ATOM   4613  C19 CHL1K 472       2.500  43.047 118.595  1.00  0.00           C
ATOM   4614 H19A CHL1K 472       1.585  42.419 118.665  1.00  0.00           H
ATOM   4615 H19B CHL1K 472       2.517  43.459 119.627  1.00  0.00           H
ATOM   4616 H19C CHL1K 472       2.182  43.771 117.815  1.00  0.00           H
ATOM   4617  C1  CHL1K 472       4.191  41.340 119.160  1.00  0.00           C
ATOM   4618  H1A CHL1K 472       3.351  40.628 119.306  1.00  0.00           H
ATOM   4619  H1B CHL1K 472       5.116  40.853 118.784  1.00  0.00           H
ATOM   4620  C2  CHL1K 472       4.553  41.919 120.598  1.00  0.00           C
ATOM   4621  H2A CHL1K 472       4.811  41.161 121.369  1.00  0.00           H
ATOM   4622  H2B CHL1K 472       3.586  42.336 120.950  1.00  0.00           H
ATOM   4623  C20 CHL1K 472       0.876  40.199 111.929  1.00  0.00           C
ATOM   4624  H20 CHL1K 472       0.256  41.116 111.836  1.00  0.00           H
ATOM   4625  C21 CHL1K 472       0.181  39.153 112.750  1.00  0.00           C
ATOM   4626 H21A CHL1K 472      -0.227  39.571 113.695  1.00  0.00           H
ATOM   4627 H21B CHL1K 472       0.930  38.386 113.045  1.00  0.00           H
ATOM   4628 H21C CHL1K 472      -0.682  38.677 112.237  1.00  0.00           H
ATOM   4629  C22 CHL1K 472       1.279  39.692 110.516  1.00  0.00           C
ATOM   4630 H22A CHL1K 472       1.941  40.392 109.964  1.00  0.00           H
ATOM   4631 H22B CHL1K 472       1.925  38.822 110.762  1.00  0.00           H
ATOM   4632  C23 CHL1K 472       0.163  39.392 109.544  1.00  0.00           C
ATOM   4633 H23A CHL1K 472      -0.598  38.683 109.934  1.00  0.00           H
ATOM   4634 H23B CHL1K 472      -0.328  40.380 109.413  1.00  0.00           H
ATOM   4635  C24 CHL1K 472       0.572  38.947 108.166  1.00  0.00           C
ATOM   4636 H24A CHL1K 472       1.361  39.600 107.735  1.00  0.00           H
ATOM   4637 H24B CHL1K 472       1.072  37.963 108.293  1.00  0.00           H
ATOM   4638  C25 CHL1K 472      -0.610  38.747 107.263  1.00  0.00           C
ATOM   4639  H25 CHL1K 472      -1.504  38.303 107.750  1.00  0.00           H
ATOM   4640  C26 CHL1K 472      -1.102  40.129 106.827  1.00  0.00           C
ATOM   4641 H26A CHL1K 472      -1.395  40.850 107.620  1.00  0.00           H
ATOM   4642 H26B CHL1K 472      -0.350  40.770 106.319  1.00  0.00           H
ATOM   4643 H26C CHL1K 472      -1.960  39.977 106.138  1.00  0.00           H
ATOM   4644  C27 CHL1K 472      -0.110  37.948 106.114  1.00  0.00           C
ATOM   4645 H27A CHL1K 472       0.155  36.897 106.361  1.00  0.00           H
ATOM   4646 H27B CHL1K 472      -0.882  37.871 105.320  1.00  0.00           H
ATOM   4647 H27C CHL1K 472       0.834  38.381 105.720  1.00  0.00           H
ATOM   4648  C3  CHL1L 473       7.863  39.641 120.434  1.00  0.00           C
ATOM   4649  H3  CHL1L 473       6.868  40.135 120.420  1.00  0.00           H
ATOM   4650  O3  CHL1L 473       8.313  39.675 121.737  1.00  0.00           O
ATOM   4651  H3' CHL1L 473       8.238  38.777 122.070  1.00  0.00           H
ATOM   4652  C4  CHL1L 473       7.636  38.182 119.961  1.00  0.00           C
ATOM   4653  H4A CHL1L 473       8.510  37.508 120.086  1.00  0.00           H
ATOM   4654  H4B CHL1L 473       6.813  37.808 120.607  1.00  0.00           H
ATOM   4655  C5  CHL1L 473       7.144  38.164 118.526  1.00  0.00           C
ATOM   4656  C6  CHL1L 473       6.012  37.542 118.207  1.00  0.00           C
ATOM   4657  H6  CHL1L 473       5.514  36.981 119.012  1.00  0.00           H
ATOM   4658  C7  CHL1L 473       5.454  37.505 116.776  1.00  0.00           C
ATOM   4659  H7A CHL1L 473       5.137  36.451 116.626  1.00  0.00           H
ATOM   4660  H7B CHL1L 473       4.537  38.131 116.732  1.00  0.00           H
ATOM   4661  C8  CHL1L 473       6.467  37.916 115.726  1.00  0.00           C
ATOM   4662  H8  CHL1L 473       7.174  37.065 115.622  1.00  0.00           H
ATOM   4663  C14 CHL1L 473       5.758  38.186 114.359  1.00  0.00           C
ATOM   4664  H14 CHL1L 473       5.069  39.023 114.602  1.00  0.00           H
ATOM   4665  C15 CHL1L 473       4.911  37.089 113.836  1.00  0.00           C
ATOM   4666 H15A CHL1L 473       5.442  36.119 113.939  1.00  0.00           H
ATOM   4667 H15B CHL1L 473       3.900  37.023 114.294  1.00  0.00           H
ATOM   4668  C16 CHL1L 473       4.832  37.355 112.352  1.00  0.00           C
ATOM   4669 H16A CHL1L 473       5.052  36.489 111.692  1.00  0.00           H
ATOM   4670 H16B CHL1L 473       3.784  37.565 112.049  1.00  0.00           H
ATOM   4671  C17 CHL1L 473       5.802  38.639 112.022  1.00  0.00           C
ATOM   4672  H17 CHL1L 473       5.148  39.524 112.180  1.00  0.00           H
ATOM   4673  C13 CHL1L 473       6.748  38.690 113.257  1.00  0.00           C
ATOM   4674  C18 CHL1L 473       7.832  37.600 113.065  1.00  0.00           C
ATOM   4675 H18A CHL1L 473       8.553  37.566 113.909  1.00  0.00           H
ATOM   4676 H18B CHL1L 473       7.373  36.613 112.842  1.00  0.00           H
ATOM   4677 H18C CHL1L 473       8.317  37.924 112.119  1.00  0.00           H
ATOM   4678  C12 CHL1L 473       7.345  40.040 113.695  1.00  0.00           C
ATOM   4679 H12A CHL1L 473       8.083  40.442 112.968  1.00  0.00           H
ATOM   4680 H12B CHL1L 473       6.489  40.731 113.849  1.00  0.00           H
ATOM   4681  C11 CHL1L 473       8.007  39.978 115.074  1.00  0.00           C
ATOM   4682 H11A CHL1L 473       8.944  39.459 114.778  1.00  0.00           H
ATOM   4683 H11B CHL1L 473       8.152  41.061 115.279  1.00  0.00           H
ATOM   4684  C9  CHL1L 473       7.137  39.229 116.157  1.00  0.00           C
ATOM   4685  H9  CHL1L 473       6.316  39.959 116.323  1.00  0.00           H
ATOM   4686  C10 CHL1L 473       7.900  39.088 117.453  1.00  0.00           C
ATOM   4687  C19 CHL1L 473       9.281  38.473 117.165  1.00  0.00           C
ATOM   4688 H19A CHL1L 473       9.945  39.272 116.773  1.00  0.00           H
ATOM   4689 H19B CHL1L 473       9.807  38.305 118.129  1.00  0.00           H
ATOM   4690 H19C CHL1L 473       9.420  37.677 116.402  1.00  0.00           H
ATOM   4691  C1  CHL1L 473       8.129  40.504 118.075  1.00  0.00           C
ATOM   4692  H1A CHL1L 473       8.771  41.010 117.322  1.00  0.00           H
ATOM   4693  H1B CHL1L 473       7.250  41.181 118.128  1.00  0.00           H
ATOM   4694  C2  CHL1L 473       8.764  40.399 119.447  1.00  0.00           C
ATOM   4695  H2A CHL1L 473       8.777  41.420 119.885  1.00  0.00           H
ATOM   4696  H2B CHL1L 473       9.829  40.104 119.563  1.00  0.00           H
ATOM   4697  C20 CHL1L 473       6.273  38.471 110.575  1.00  0.00           C
ATOM   4698  H20 CHL1L 473       6.800  37.509 110.397  1.00  0.00           H
ATOM   4699  C21 CHL1L 473       7.303  39.605 110.198  1.00  0.00           C
ATOM   4700 H21A CHL1L 473       7.750  39.347 109.214  1.00  0.00           H
ATOM   4701 H21B CHL1L 473       7.946  39.527 111.100  1.00  0.00           H
ATOM   4702 H21C CHL1L 473       6.756  40.572 110.160  1.00  0.00           H
ATOM   4703  C22 CHL1L 473       5.079  38.531 109.606  1.00  0.00           C
ATOM   4704 H22A CHL1L 473       4.321  37.845 110.042  1.00  0.00           H
ATOM   4705 H22B CHL1L 473       4.679  39.562 109.500  1.00  0.00           H
ATOM   4706  C23 CHL1L 473       5.414  38.079 108.199  1.00  0.00           C
ATOM   4707 H23A CHL1L 473       4.690  38.336 107.396  1.00  0.00           H
ATOM   4708 H23B CHL1L 473       6.345  38.556 107.823  1.00  0.00           H
ATOM   4709  C24 CHL1L 473       5.589  36.518 108.115  1.00  0.00           C
ATOM   4710 H24A CHL1L 473       6.009  36.293 107.111  1.00  0.00           H
ATOM   4711 H24B CHL1L 473       6.425  36.273 108.805  1.00  0.00           H
ATOM   4712  C25 CHL1L 473       4.421  35.705 108.441  1.00  0.00           C
ATOM   4713  H25 CHL1L 473       4.176  35.711 109.524  1.00  0.00           H
ATOM   4714  C26 CHL1L 473       3.172  36.211 107.672  1.00  0.00           C
ATOM   4715 H26A CHL1L 473       2.934  37.270 107.909  1.00  0.00           H
ATOM   4716 H26B CHL1L 473       3.376  36.028 106.595  1.00  0.00           H
ATOM   4717 H26C CHL1L 473       2.348  35.510 107.925  1.00  0.00           H
ATOM   4718  C27 CHL1L 473       4.642  34.222 108.046  1.00  0.00           C
ATOM   4719 H27A CHL1L 473       3.717  33.637 108.239  1.00  0.00           H
ATOM   4720 H27B CHL1L 473       4.849  34.113 106.960  1.00  0.00           H
ATOM   4721 H27C CHL1L 473       5.590  33.942 108.553  1.00  0.00           H
ATOM   4722  C3  CHL1M 474      44.020  51.710 124.983  1.00  0.00           C
ATOM   4723  H3  CHL1M 474      43.188  50.986 124.854  1.00  0.00           H
ATOM   4724  O3  CHL1M 474      43.891  52.002 126.352  1.00  0.00           O
ATOM   4725  H3' CHL1M 474      44.792  52.195 126.621  1.00  0.00           H
ATOM   4726  C4  CHL1M 474      45.323  51.039 124.691  1.00  0.00           C
ATOM   4727  H4A CHL1M 474      46.175  51.736 124.845  1.00  0.00           H
ATOM   4728  H4B CHL1M 474      45.534  50.196 125.383  1.00  0.00           H
ATOM   4729  C5  CHL1M 474      45.344  50.479 123.289  1.00  0.00           C
ATOM   4730  C6  CHL1M 474      45.679  49.172 123.010  1.00  0.00           C
ATOM   4731  H6  CHL1M 474      46.063  48.523 123.812  1.00  0.00           H
ATOM   4732  C7  CHL1M 474      45.817  48.652 121.610  1.00  0.00           C
ATOM   4733  H7A CHL1M 474      46.771  48.113 121.427  1.00  0.00           H
ATOM   4734  H7B CHL1M 474      45.159  47.781 121.404  1.00  0.00           H
ATOM   4735  C8  CHL1M 474      45.672  49.786 120.473  1.00  0.00           C
ATOM   4736  H8  CHL1M 474      46.685  50.213 120.312  1.00  0.00           H
ATOM   4737  C14 CHL1M 474      45.238  49.172 119.234  1.00  0.00           C
ATOM   4738  H14 CHL1M 474      44.201  48.821 119.423  1.00  0.00           H
ATOM   4739  C15 CHL1M 474      46.054  47.904 118.792  1.00  0.00           C
ATOM   4740 H15A CHL1M 474      47.136  48.034 119.006  1.00  0.00           H
ATOM   4741 H15B CHL1M 474      45.616  47.064 119.372  1.00  0.00           H
ATOM   4742  C16 CHL1M 474      45.508  47.675 117.395  1.00  0.00           C
ATOM   4743 H16A CHL1M 474      46.328  47.423 116.689  1.00  0.00           H
ATOM   4744 H16B CHL1M 474      44.848  46.788 117.276  1.00  0.00           H
ATOM   4745  C17 CHL1M 474      44.692  48.926 116.895  1.00  0.00           C
ATOM   4746  H17 CHL1M 474      43.603  48.712 116.949  1.00  0.00           H
ATOM   4747  C13 CHL1M 474      45.044  50.010 117.948  1.00  0.00           C
ATOM   4748  C18 CHL1M 474      46.410  50.587 117.502  1.00  0.00           C
ATOM   4749 H18A CHL1M 474      46.600  51.356 118.282  1.00  0.00           H
ATOM   4750 H18B CHL1M 474      47.211  49.848 117.290  1.00  0.00           H
ATOM   4751 H18C CHL1M 474      46.288  51.116 116.533  1.00  0.00           H
ATOM   4752  C12 CHL1M 474      44.069  51.106 118.326  1.00  0.00           C
ATOM   4753 H12A CHL1M 474      43.948  51.825 117.488  1.00  0.00           H
ATOM   4754 H12B CHL1M 474      43.026  50.780 118.525  1.00  0.00           H
ATOM   4755  C11 CHL1M 474      44.512  51.861 119.673  1.00  0.00           C
ATOM   4756 H11A CHL1M 474      45.461  52.391 119.442  1.00  0.00           H
ATOM   4757 H11B CHL1M 474      43.674  52.582 119.788  1.00  0.00           H
ATOM   4758  C9  CHL1M 474      44.648  50.903 120.825  1.00  0.00           C
ATOM   4759  H9  CHL1M 474      43.676  50.388 120.983  1.00  0.00           H
ATOM   4760  C10 CHL1M 474      45.041  51.542 122.208  1.00  0.00           C
ATOM   4761  C19 CHL1M 474      46.310  52.371 122.043  1.00  0.00           C
ATOM   4762 H19A CHL1M 474      46.205  53.143 121.250  1.00  0.00           H
ATOM   4763 H19B CHL1M 474      46.425  52.957 122.980  1.00  0.00           H
ATOM   4764 H19C CHL1M 474      47.193  51.714 121.893  1.00  0.00           H
ATOM   4765  C1  CHL1M 474      43.845  52.484 122.618  1.00  0.00           C
ATOM   4766  H1A CHL1M 474      44.086  53.367 121.989  1.00  0.00           H
ATOM   4767  H1B CHL1M 474      42.893  52.019 122.283  1.00  0.00           H
ATOM   4768  C2  CHL1M 474      43.762  52.911 124.092  1.00  0.00           C
ATOM   4769  H2A CHL1M 474      42.711  53.211 124.292  1.00  0.00           H
ATOM   4770  H2B CHL1M 474      44.476  53.649 124.516  1.00  0.00           H
ATOM   4771  C20 CHL1M 474      44.968  49.136 115.432  1.00  0.00           C
ATOM   4772  H20 CHL1M 474      45.930  49.668 115.267  1.00  0.00           H
ATOM   4773  C21 CHL1M 474      43.936  50.068 114.782  1.00  0.00           C
ATOM   4774 H21A CHL1M 474      44.388  50.413 113.828  1.00  0.00           H
ATOM   4775 H21B CHL1M 474      43.754  50.926 115.464  1.00  0.00           H
ATOM   4776 H21C CHL1M 474      42.973  49.559 114.566  1.00  0.00           H
ATOM   4777  C22 CHL1M 474      44.871  47.752 114.605  1.00  0.00           C
ATOM   4778 H22A CHL1M 474      45.667  47.037 114.906  1.00  0.00           H
ATOM   4779 H22B CHL1M 474      43.853  47.388 114.861  1.00  0.00           H
ATOM   4780  C23 CHL1M 474      44.803  47.935 113.089  1.00  0.00           C
ATOM   4781 H23A CHL1M 474      43.832  48.347 112.739  1.00  0.00           H
ATOM   4782 H23B CHL1M 474      45.530  48.739 112.845  1.00  0.00           H
ATOM   4783  C24 CHL1M 474      45.050  46.613 112.378  1.00  0.00           C
ATOM   4784 H24A CHL1M 474      46.008  46.188 112.745  1.00  0.00           H
ATOM   4785 H24B CHL1M 474      44.217  45.942 112.680  1.00  0.00           H
ATOM   4786  C25 CHL1M 474      44.951  46.676 110.810  1.00  0.00           C
ATOM   4787  H25 CHL1M 474      45.145  45.618 110.530  1.00  0.00           H
ATOM   4788  C26 CHL1M 474      43.527  46.955 110.352  1.00  0.00           C
ATOM   4789 H26A CHL1M 474      42.840  46.300 110.930  1.00  0.00           H
ATOM   4790 H26B CHL1M 474      43.313  48.043 110.417  1.00  0.00           H
ATOM   4791 H26C CHL1M 474      43.426  46.610 109.301  1.00  0.00           H
ATOM   4792  C27 CHL1M 474      46.042  47.598 110.271  1.00  0.00           C
ATOM   4793 H27A CHL1M 474      45.685  48.644 110.388  1.00  0.00           H
ATOM   4794 H27B CHL1M 474      47.013  47.387 110.769  1.00  0.00           H
ATOM   4795 H27C CHL1M 474      46.167  47.242 109.226  1.00  0.00           H
ATOM   4796  C3  CHL1N 475      19.315  42.906 119.901  1.00  0.00           C
ATOM   4797  H3  CHL1N 475      19.992  42.299 119.262  1.00  0.00           H
ATOM   4798  O3  CHL1N 475      19.737  42.667 121.257  1.00  0.00           O
ATOM   4799  H3' CHL1N 475      20.648  42.967 121.292  1.00  0.00           H
ATOM   4800  C4  CHL1N 475      19.128  44.370 119.533  1.00  0.00           C
ATOM   4801  H4A CHL1N 475      18.347  44.896 120.124  1.00  0.00           H
ATOM   4802  H4B CHL1N 475      20.045  44.926 119.823  1.00  0.00           H
ATOM   4803  C5  CHL1N 475      18.815  44.733 118.155  1.00  0.00           C
ATOM   4804  C6  CHL1N 475      19.565  45.455 117.332  1.00  0.00           C
ATOM   4805  H6  CHL1N 475      20.450  45.909 117.801  1.00  0.00           H
ATOM   4806  C7  CHL1N 475      19.304  45.636 115.923  1.00  0.00           C
ATOM   4807  H7A CHL1N 475      19.638  46.653 115.623  1.00  0.00           H
ATOM   4808  H7B CHL1N 475      19.835  44.868 115.321  1.00  0.00           H
ATOM   4809  C8  CHL1N 475      17.842  45.342 115.550  1.00  0.00           C
ATOM   4810  H8  CHL1N 475      17.111  46.093 115.918  1.00  0.00           H
ATOM   4811  C14 CHL1N 475      17.739  45.237 114.037  1.00  0.00           C
ATOM   4812  H14 CHL1N 475      18.384  44.367 113.790  1.00  0.00           H
ATOM   4813  C15 CHL1N 475      18.117  46.443 113.205  1.00  0.00           C
ATOM   4814 H15A CHL1N 475      17.657  47.411 113.496  1.00  0.00           H
ATOM   4815 H15B CHL1N 475      19.217  46.544 113.087  1.00  0.00           H
ATOM   4816  C16 CHL1N 475      17.603  46.164 111.798  1.00  0.00           C
ATOM   4817 H16A CHL1N 475      16.925  47.010 111.557  1.00  0.00           H
ATOM   4818 H16B CHL1N 475      18.386  46.017 111.023  1.00  0.00           H
ATOM   4819  C17 CHL1N 475      16.736  44.854 111.926  1.00  0.00           C
ATOM   4820  H17 CHL1N 475      17.438  44.012 111.741  1.00  0.00           H
ATOM   4821  C13 CHL1N 475      16.388  44.802 113.483  1.00  0.00           C
ATOM   4822  C18 CHL1N 475      15.118  45.776 113.833  1.00  0.00           C
ATOM   4823 H18A CHL1N 475      14.192  45.252 113.513  1.00  0.00           H
ATOM   4824 H18B CHL1N 475      15.060  45.996 114.921  1.00  0.00           H
ATOM   4825 H18C CHL1N 475      15.234  46.736 113.286  1.00  0.00           H
ATOM   4826  C12 CHL1N 475      16.035  43.399 114.013  1.00  0.00           C
ATOM   4827 H12A CHL1N 475      15.028  42.985 113.794  1.00  0.00           H
ATOM   4828 H12B CHL1N 475      16.795  42.650 113.706  1.00  0.00           H
ATOM   4829  C11 CHL1N 475      16.051  43.432 115.586  1.00  0.00           C
ATOM   4830 H11A CHL1N 475      15.259  44.145 115.902  1.00  0.00           H
ATOM   4831 H11B CHL1N 475      15.805  42.430 115.999  1.00  0.00           H
ATOM   4832  C9  CHL1N 475      17.375  44.009 116.145  1.00  0.00           C
ATOM   4833  H9  CHL1N 475      18.150  43.314 115.756  1.00  0.00           H
ATOM   4834  C10 CHL1N 475      17.482  43.986 117.716  1.00  0.00           C
ATOM   4835  C19 CHL1N 475      16.255  44.699 118.421  1.00  0.00           C
ATOM   4836 H19A CHL1N 475      15.260  44.264 118.186  1.00  0.00           H
ATOM   4837 H19B CHL1N 475      16.432  44.334 119.456  1.00  0.00           H
ATOM   4838 H19C CHL1N 475      16.198  45.781 118.174  1.00  0.00           H
ATOM   4839  C1  CHL1N 475      17.485  42.521 118.148  1.00  0.00           C
ATOM   4840  H1A CHL1N 475      16.492  42.030 118.058  1.00  0.00           H
ATOM   4841  H1B CHL1N 475      18.230  41.994 117.514  1.00  0.00           H
ATOM   4842  C2  CHL1N 475      17.934  42.241 119.619  1.00  0.00           C
ATOM   4843  H2A CHL1N 475      17.984  41.136 119.729  1.00  0.00           H
ATOM   4844  H2B CHL1N 475      17.113  42.628 120.260  1.00  0.00           H
ATOM   4845  C20 CHL1N 475      15.647  44.905 110.852  1.00  0.00           C
ATOM   4846  H20 CHL1N 475      15.030  45.785 111.134  1.00  0.00           H
ATOM   4847  C21 CHL1N 475      14.751  43.712 111.004  1.00  0.00           C
ATOM   4848 H21A CHL1N 475      13.950  43.632 110.237  1.00  0.00           H
ATOM   4849 H21B CHL1N 475      14.169  43.926 111.925  1.00  0.00           H
ATOM   4850 H21C CHL1N 475      15.311  42.760 111.128  1.00  0.00           H
ATOM   4851  C22 CHL1N 475      16.129  45.130 109.405  1.00  0.00           C
ATOM   4852 H22A CHL1N 475      16.496  46.166 109.242  1.00  0.00           H
ATOM   4853 H22B CHL1N 475      17.077  44.588 109.198  1.00  0.00           H
ATOM   4854  C23 CHL1N 475      15.190  44.788 108.231  1.00  0.00           C
ATOM   4855 H23A CHL1N 475      14.682  43.832 108.481  1.00  0.00           H
ATOM   4856 H23B CHL1N 475      14.368  45.529 108.329  1.00  0.00           H
ATOM   4857  C24 CHL1N 475      15.875  44.905 106.890  1.00  0.00           C
ATOM   4858 H24A CHL1N 475      16.353  45.907 106.849  1.00  0.00           H
ATOM   4859 H24B CHL1N 475      16.679  44.143 106.812  1.00  0.00           H
ATOM   4860  C25 CHL1N 475      14.978  44.651 105.673  1.00  0.00           C
ATOM   4861  H25 CHL1N 475      14.586  43.612 105.706  1.00  0.00           H
ATOM   4862  C26 CHL1N 475      13.749  45.579 105.737  1.00  0.00           C
ATOM   4863 H26A CHL1N 475      12.981  45.187 106.439  1.00  0.00           H
ATOM   4864 H26B CHL1N 475      14.027  46.604 106.063  1.00  0.00           H
ATOM   4865 H26C CHL1N 475      13.256  45.607 104.742  1.00  0.00           H
ATOM   4866  C27 CHL1N 475      15.758  44.778 104.375  1.00  0.00           C
ATOM   4867 H27A CHL1N 475      16.656  44.124 104.339  1.00  0.00           H
ATOM   4868 H27B CHL1N 475      15.039  44.528 103.566  1.00  0.00           H
ATOM   4869 H27C CHL1N 475      16.077  45.840 104.311  1.00  0.00           H
ATOM   4870  C3  CHL1O 476      57.558   3.099 124.436  1.00  0.00           C
ATOM   4871  H3  CHL1O 476      58.546   2.785 124.835  1.00  0.00           H
ATOM   4872  O3  CHL1O 476      56.831   3.596 125.559  1.00  0.00           O
ATOM   4873  H3' CHL1O 476      56.066   4.071 125.227  1.00  0.00           H
ATOM   4874  C4  CHL1O 476      57.613   4.258 123.397  1.00  0.00           C
ATOM   4875  H4A CHL1O 476      56.627   4.761 123.303  1.00  0.00           H
ATOM   4876  H4B CHL1O 476      58.198   5.082 123.859  1.00  0.00           H
ATOM   4877  C5  CHL1O 476      58.018   3.857 121.954  1.00  0.00           C
ATOM   4878  C6  CHL1O 476      59.043   4.433 121.319  1.00  0.00           C
ATOM   4879  H6  CHL1O 476      59.614   5.151 121.926  1.00  0.00           H
ATOM   4880  C7  CHL1O 476      59.273   4.199 119.867  1.00  0.00           C
ATOM   4881  H7A CHL1O 476      59.473   5.144 119.318  1.00  0.00           H
ATOM   4882  H7B CHL1O 476      60.189   3.576 119.781  1.00  0.00           H
ATOM   4883  C8  CHL1O 476      58.196   3.357 119.092  1.00  0.00           C
ATOM   4884  H8  CHL1O 476      57.391   4.115 118.982  1.00  0.00           H
ATOM   4885  C14 CHL1O 476      58.758   2.870 117.772  1.00  0.00           C
ATOM   4886  H14 CHL1O 476      59.539   2.109 117.985  1.00  0.00           H
ATOM   4887  C15 CHL1O 476      59.349   3.849 116.748  1.00  0.00           C
ATOM   4888 H15A CHL1O 476      58.615   4.661 116.556  1.00  0.00           H
ATOM   4889 H15B CHL1O 476      60.337   4.287 117.005  1.00  0.00           H
ATOM   4890  C16 CHL1O 476      59.308   3.068 115.416  1.00  0.00           C
ATOM   4891 H16A CHL1O 476      58.852   3.728 114.648  1.00  0.00           H
ATOM   4892 H16B CHL1O 476      60.296   2.691 115.075  1.00  0.00           H
ATOM   4893  C17 CHL1O 476      58.393   1.863 115.747  1.00  0.00           C
ATOM   4894  H17 CHL1O 476      59.076   1.037 116.039  1.00  0.00           H
ATOM   4895  C13 CHL1O 476      57.661   2.115 117.068  1.00  0.00           C
ATOM   4896  C18 CHL1O 476      56.397   2.846 116.708  1.00  0.00           C
ATOM   4897 H18A CHL1O 476      55.524   2.274 116.327  1.00  0.00           H
ATOM   4898 H18B CHL1O 476      55.975   3.500 117.501  1.00  0.00           H
ATOM   4899 H18C CHL1O 476      56.580   3.532 115.854  1.00  0.00           H
ATOM   4900  C12 CHL1O 476      57.426   0.782 117.898  1.00  0.00           C
ATOM   4901 H12A CHL1O 476      56.722   0.075 117.410  1.00  0.00           H
ATOM   4902 H12B CHL1O 476      58.327   0.177 118.137  1.00  0.00           H
ATOM   4903  C11 CHL1O 476      56.781   1.198 119.237  1.00  0.00           C
ATOM   4904 H11A CHL1O 476      55.777   1.635 119.045  1.00  0.00           H
ATOM   4905 H11B CHL1O 476      56.636   0.314 119.894  1.00  0.00           H
ATOM   4906  C9  CHL1O 476      57.728   2.179 120.012  1.00  0.00           C
ATOM   4907  H9  CHL1O 476      58.579   1.489 120.196  1.00  0.00           H
ATOM   4908  C10 CHL1O 476      57.143   2.676 121.407  1.00  0.00           C
ATOM   4909  C19 CHL1O 476      55.640   3.087 121.150  1.00  0.00           C
ATOM   4910 H19A CHL1O 476      55.590   3.729 120.245  1.00  0.00           H
ATOM   4911 H19B CHL1O 476      54.931   2.263 120.919  1.00  0.00           H
ATOM   4912 H19C CHL1O 476      55.276   3.761 121.955  1.00  0.00           H
ATOM   4913  C1  CHL1O 476      57.248   1.487 122.435  1.00  0.00           C
ATOM   4914  H1A CHL1O 476      56.578   0.657 122.125  1.00  0.00           H
ATOM   4915  H1B CHL1O 476      58.278   1.073 122.484  1.00  0.00           H
ATOM   4916  C2  CHL1O 476      56.771   1.873 123.901  1.00  0.00           C
ATOM   4917  H2A CHL1O 476      56.864   0.974 124.547  1.00  0.00           H
ATOM   4918  H2B CHL1O 476      55.710   2.147 123.718  1.00  0.00           H
ATOM   4919  C20 CHL1O 476      57.578   1.107 114.588  1.00  0.00           C
ATOM   4920  H20 CHL1O 476      56.648   0.666 115.008  1.00  0.00           H
ATOM   4921  C21 CHL1O 476      58.375  -0.160 114.176  1.00  0.00           C
ATOM   4922 H21A CHL1O 476      58.431  -0.773 115.101  1.00  0.00           H
ATOM   4923 H21B CHL1O 476      59.380   0.012 113.735  1.00  0.00           H
ATOM   4924 H21C CHL1O 476      57.862  -0.707 113.355  1.00  0.00           H
ATOM   4925  C22 CHL1O 476      57.168   1.985 113.405  1.00  0.00           C
ATOM   4926 H22A CHL1O 476      56.692   2.949 113.685  1.00  0.00           H
ATOM   4927 H22B CHL1O 476      58.134   2.277 112.940  1.00  0.00           H
ATOM   4928  C23 CHL1O 476      56.314   1.193 112.369  1.00  0.00           C
ATOM   4929 H23A CHL1O 476      56.928   0.345 111.997  1.00  0.00           H
ATOM   4930 H23B CHL1O 476      55.502   0.675 112.923  1.00  0.00           H
ATOM   4931  C24 CHL1O 476      55.702   2.065 111.256  1.00  0.00           C
ATOM   4932 H24A CHL1O 476      55.054   2.785 111.799  1.00  0.00           H
ATOM   4933 H24B CHL1O 476      56.444   2.649 110.671  1.00  0.00           H
ATOM   4934  C25 CHL1O 476      54.939   1.150 110.275  1.00  0.00           C
ATOM   4935  H25 CHL1O 476      54.267   0.397 110.740  1.00  0.00           H
ATOM   4936  C26 CHL1O 476      54.013   1.990 109.320  1.00  0.00           C
ATOM   4937 H26A CHL1O 476      53.691   1.397 108.438  1.00  0.00           H
ATOM   4938 H26B CHL1O 476      53.113   2.202 109.937  1.00  0.00           H
ATOM   4939 H26C CHL1O 476      54.484   2.972 109.101  1.00  0.00           H
ATOM   4940  C27 CHL1O 476      55.901   0.387 109.288  1.00  0.00           C
ATOM   4941 H27A CHL1O 476      55.385  -0.056 108.410  1.00  0.00           H
ATOM   4942 H27B CHL1O 476      56.665   1.092 108.894  1.00  0.00           H
ATOM   4943 H27C CHL1O 476      56.372  -0.469 109.817  1.00  0.00           H
ATOM   4944  C3  CHL1P 477      72.613  27.180 123.688  1.00  0.00           C
ATOM   4945  H3  CHL1P 477      73.109  26.187 123.649  1.00  0.00           H
ATOM   4946  O3  CHL1P 477      72.986  27.792 124.929  1.00  0.00           O
ATOM   4947  H3' CHL1P 477      73.715  27.309 125.325  1.00  0.00           H
ATOM   4948  C4  CHL1P 477      73.117  28.084 122.622  1.00  0.00           C
ATOM   4949  H4A CHL1P 477      72.619  29.072 122.723  1.00  0.00           H
ATOM   4950  H4B CHL1P 477      74.201  28.321 122.676  1.00  0.00           H
ATOM   4951  C5  CHL1P 477      72.836  27.544 121.167  1.00  0.00           C
ATOM   4952  C6  CHL1P 477      73.881  27.231 120.382  1.00  0.00           C
ATOM   4953  H6  CHL1P 477      74.890  27.528 120.706  1.00  0.00           H
ATOM   4954  C7  CHL1P 477      73.657  26.639 118.999  1.00  0.00           C
ATOM   4955  H7A CHL1P 477      74.257  27.150 118.216  1.00  0.00           H
ATOM   4956  H7B CHL1P 477      73.992  25.582 118.938  1.00  0.00           H
ATOM   4957  C8  CHL1P 477      72.230  26.682 118.472  1.00  0.00           C
ATOM   4958  H8  CHL1P 477      72.098  27.725 118.111  1.00  0.00           H
ATOM   4959  C14 CHL1P 477      72.126  25.708 117.301  1.00  0.00           C
ATOM   4960  H14 CHL1P 477      72.526  24.716 117.602  1.00  0.00           H
ATOM   4961  C15 CHL1P 477      73.117  26.037 116.090  1.00  0.00           C
ATOM   4962 H15A CHL1P 477      73.281  27.121 115.910  1.00  0.00           H
ATOM   4963 H15B CHL1P 477      74.059  25.546 116.415  1.00  0.00           H
ATOM   4964  C16 CHL1P 477      72.395  25.365 114.883  1.00  0.00           C
ATOM   4965 H16A CHL1P 477      72.110  26.085 114.086  1.00  0.00           H
ATOM   4966 H16B CHL1P 477      73.087  24.592 114.487  1.00  0.00           H
ATOM   4967  C17 CHL1P 477      71.025  24.748 115.415  1.00  0.00           C
ATOM   4968  H17 CHL1P 477      71.248  23.739 115.822  1.00  0.00           H
ATOM   4969  C13 CHL1P 477      70.727  25.587 116.689  1.00  0.00           C
ATOM   4970  C18 CHL1P 477      70.297  26.972 116.193  1.00  0.00           C
ATOM   4971 H18A CHL1P 477      70.930  27.492 115.442  1.00  0.00           H
ATOM   4972 H18B CHL1P 477      69.272  26.890 115.772  1.00  0.00           H
ATOM   4973 H18C CHL1P 477      70.234  27.680 117.047  1.00  0.00           H
ATOM   4974  C12 CHL1P 477      69.742  24.998 117.746  1.00  0.00           C
ATOM   4975 H12A CHL1P 477      68.732  25.084 117.292  1.00  0.00           H
ATOM   4976 H12B CHL1P 477      70.004  23.954 118.024  1.00  0.00           H
ATOM   4977  C11 CHL1P 477      69.845  25.880 119.014  1.00  0.00           C
ATOM   4978 H11A CHL1P 477      69.342  26.813 118.680  1.00  0.00           H
ATOM   4979 H11B CHL1P 477      69.113  25.530 119.772  1.00  0.00           H
ATOM   4980  C9  CHL1P 477      71.301  26.175 119.574  1.00  0.00           C
ATOM   4981  H9  CHL1P 477      71.804  25.216 119.825  1.00  0.00           H
ATOM   4982  C10 CHL1P 477      71.402  27.124 120.890  1.00  0.00           C
ATOM   4983  C19 CHL1P 477      70.517  28.385 120.681  1.00  0.00           C
ATOM   4984 H19A CHL1P 477      69.417  28.231 120.680  1.00  0.00           H
ATOM   4985 H19B CHL1P 477      70.709  29.133 121.479  1.00  0.00           H
ATOM   4986 H19C CHL1P 477      70.748  28.849 119.698  1.00  0.00           H
ATOM   4987  C1  CHL1P 477      70.859  26.313 122.139  1.00  0.00           C
ATOM   4988  H1A CHL1P 477      69.772  26.133 121.998  1.00  0.00           H
ATOM   4989  H1B CHL1P 477      71.251  25.274 122.087  1.00  0.00           H
ATOM   4990  C2  CHL1P 477      71.145  26.936 123.526  1.00  0.00           C
ATOM   4991  H2A CHL1P 477      70.825  26.162 124.256  1.00  0.00           H
ATOM   4992  H2B CHL1P 477      70.569  27.829 123.850  1.00  0.00           H
ATOM   4993  C20 CHL1P 477      70.020  24.563 114.310  1.00  0.00           C
ATOM   4994  H20 CHL1P 477      69.569  25.526 113.990  1.00  0.00           H
ATOM   4995  C21 CHL1P 477      68.954  23.589 114.683  1.00  0.00           C
ATOM   4996 H21A CHL1P 477      69.285  22.578 114.362  1.00  0.00           H
ATOM   4997 H21B CHL1P 477      67.985  23.886 114.228  1.00  0.00           H
ATOM   4998 H21C CHL1P 477      68.674  23.585 115.758  1.00  0.00           H
ATOM   4999  C22 CHL1P 477      70.753  24.080 112.945  1.00  0.00           C
ATOM   5000 H22A CHL1P 477      71.237  24.985 112.521  1.00  0.00           H
ATOM   5001 H22B CHL1P 477      71.526  23.283 112.981  1.00  0.00           H
ATOM   5002  C23 CHL1P 477      69.695  23.681 111.832  1.00  0.00           C
ATOM   5003 H23A CHL1P 477      70.195  23.432 110.872  1.00  0.00           H
ATOM   5004 H23B CHL1P 477      69.242  22.713 112.136  1.00  0.00           H
ATOM   5005  C24 CHL1P 477      68.651  24.735 111.470  1.00  0.00           C
ATOM   5006 H24A CHL1P 477      68.250  25.215 112.388  1.00  0.00           H
ATOM   5007 H24B CHL1P 477      68.938  25.594 110.825  1.00  0.00           H
ATOM   5008  C25 CHL1P 477      67.451  24.165 110.714  1.00  0.00           C
ATOM   5009  H25 CHL1P 477      67.774  23.258 110.160  1.00  0.00           H
ATOM   5010  C26 CHL1P 477      66.486  23.615 111.808  1.00  0.00           C
ATOM   5011 H26A CHL1P 477      66.964  22.812 112.409  1.00  0.00           H
ATOM   5012 H26B CHL1P 477      66.224  24.420 112.527  1.00  0.00           H
ATOM   5013 H26C CHL1P 477      65.595  23.135 111.348  1.00  0.00           H
ATOM   5014  C27 CHL1P 477      66.855  25.223 109.725  1.00  0.00           C
ATOM   5015 H27A CHL1P 477      67.638  25.550 109.008  1.00  0.00           H
ATOM   5016 H27B CHL1P 477      65.985  24.777 109.196  1.00  0.00           H
ATOM   5017 H27C CHL1P 477      66.693  26.206 110.217  1.00  0.00           H
ATOM   5018  C3  CHL1Q 478      52.889  25.901 120.987  1.00  0.00           C
ATOM   5019  H3  CHL1Q 478      52.261  26.540 120.331  1.00  0.00           H
ATOM   5020  O3  CHL1Q 478      52.824  26.282 122.371  1.00  0.00           O
ATOM   5021  H3' CHL1Q 478      53.405  27.045 122.409  1.00  0.00           H
ATOM   5022  C4  CHL1Q 478      52.338  24.443 120.855  1.00  0.00           C
ATOM   5023  H4A CHL1Q 478      52.730  23.692 121.574  1.00  0.00           H
ATOM   5024  H4B CHL1Q 478      51.255  24.567 121.069  1.00  0.00           H
ATOM   5025  C5  CHL1Q 478      52.499  23.944 119.399  1.00  0.00           C
ATOM   5026  C6  CHL1Q 478      51.491  23.479 118.631  1.00  0.00           C
ATOM   5027  H6  CHL1Q 478      50.444  23.576 118.957  1.00  0.00           H
ATOM   5028  C7  CHL1Q 478      51.748  22.934 117.333  1.00  0.00           C
ATOM   5029  H7A CHL1Q 478      51.281  21.926 117.334  1.00  0.00           H
ATOM   5030  H7B CHL1Q 478      51.313  23.501 116.483  1.00  0.00           H
ATOM   5031  C8  CHL1Q 478      53.251  22.614 117.052  1.00  0.00           C
ATOM   5032  H8  CHL1Q 478      53.526  21.808 117.765  1.00  0.00           H
ATOM   5033  C14 CHL1Q 478      53.441  22.216 115.593  1.00  0.00           C
ATOM   5034  H14 CHL1Q 478      53.250  23.093 114.939  1.00  0.00           H
ATOM   5035  C15 CHL1Q 478      52.467  21.107 115.072  1.00  0.00           C
ATOM   5036 H15A CHL1Q 478      52.400  20.278 115.809  1.00  0.00           H
ATOM   5037 H15B CHL1Q 478      51.455  21.523 114.882  1.00  0.00           H
ATOM   5038  C16 CHL1Q 478      53.209  20.542 113.835  1.00  0.00           C
ATOM   5039 H16A CHL1Q 478      53.571  19.505 114.004  1.00  0.00           H
ATOM   5040 H16B CHL1Q 478      52.767  20.701 112.829  1.00  0.00           H
ATOM   5041  C17 CHL1Q 478      54.561  21.338 113.767  1.00  0.00           C
ATOM   5042  H17 CHL1Q 478      54.341  22.237 113.153  1.00  0.00           H
ATOM   5043  C13 CHL1Q 478      54.843  21.804 115.244  1.00  0.00           C
ATOM   5044  C18 CHL1Q 478      55.229  20.594 116.155  1.00  0.00           C
ATOM   5045 H18A CHL1Q 478      55.157  20.806 117.243  1.00  0.00           H
ATOM   5046 H18B CHL1Q 478      54.667  19.656 115.963  1.00  0.00           H
ATOM   5047 H18C CHL1Q 478      56.277  20.332 115.896  1.00  0.00           H
ATOM   5048  C12 CHL1Q 478      55.714  23.075 115.552  1.00  0.00           C
ATOM   5049 H12A CHL1Q 478      56.774  22.840 115.317  1.00  0.00           H
ATOM   5050 H12B CHL1Q 478      55.312  23.873 114.892  1.00  0.00           H
ATOM   5051  C11 CHL1Q 478      55.632  23.500 117.066  1.00  0.00           C
ATOM   5052 H11A CHL1Q 478      56.095  22.633 117.584  1.00  0.00           H
ATOM   5053 H11B CHL1Q 478      56.270  24.378 117.305  1.00  0.00           H
ATOM   5054  C9  CHL1Q 478      54.200  23.809 117.472  1.00  0.00           C
ATOM   5055  H9  CHL1Q 478      53.938  24.689 116.848  1.00  0.00           H
ATOM   5056  C10 CHL1Q 478      53.979  24.133 118.956  1.00  0.00           C
ATOM   5057  C19 CHL1Q 478      54.853  23.166 119.799  1.00  0.00           C
ATOM   5058 H19A CHL1Q 478      54.731  23.310 120.893  1.00  0.00           H
ATOM   5059 H19B CHL1Q 478      54.610  22.108 119.559  1.00  0.00           H
ATOM   5060 H19C CHL1Q 478      55.926  23.450 119.740  1.00  0.00           H
[truncated: 7,085,206 more chars]
