# Supplementary material for: Hedgehog proteins create a dynamic cholesterol interface
Source: PLOS journal article supplement (doi:10.1371/journal.pone.0246814), 2021-02-25
Supplement: S9 (10.1371/journal.pone.0246814.s009) [file journal.pone.0246814.s009.pdf]

**Table S1. Plasmid and primer sequences.**

| <b>Plasmid Name</b> | <b>Source</b>                           |
|---------------------|-----------------------------------------|
| pCMV6-hSHH          | Origene RC222175, stop after hSHH(S462) |

**Mutagenesis primers**

| <b>Construct</b> | <b>Forward Primer</b>              | <b>Reverse Primer</b>              |
|------------------|------------------------------------|------------------------------------|
| hSHH(F199A)      | TCGGGAGGCTGCGCCCCGGGCTCGGC         | GCCGAGCCCCGGGGCGCAGCCTCCCGA        |
| hSHH(K213A)      | GCAGGGCGGCACCGCGCTGGTGAAGGAC       | GTCCTTCACCAGCGCGGTGCCGCCCTGC       |
| hSHH(D217A)      | AGCTGGTGAAGGCCCTGAGCCCCGG          | CCGGGGCTCAGGGCCTTCACCAGCT          |
| hSHH(D222A)      | GAGCCCCGGGGCCCCGCGTGCTGG           | CCAGCACGCGGGCCCCGGGGCTC            |
| hSHH(D245A)      | CCTGGACCGCGCCGACGGCGCCA            | TGGCGCCGTCGGCGCGGTCCAGG            |
| hSHH(S236A)      | GGCCGGCTGCTCTACGCCGACTTCCTCACTTT   | AAAGTGAGGAAGTCGGCGTAGAGCAGCCGGCC   |
| hSHH(D237A)      | GGCTGCTCTACAGCGCCTTCCTCACTTTCT     | AGGAAAGTGAGGAAGGCGCTGTAGAGCAGCC    |
| hSHH(L239A)      | GCTCTACAGCGACTTCGCCACTTTCTGGACCGC  | GCGGTCCAGGAAAGTGCGGAAGTCGCTGTAGAGC |
| hSHH(F241A)      | CTCTACAGCGACTTCCTCACTGCCCTGGACCGCG | CGCGGTCCAGGGCAGTGAGGAAGTCGCTGTAGAG |
| hSHH(L242A)      | AGCGACTTCCTCACTTTTCGCGGACCGCGACGA  | TCGTCGCGGTCCGCGAAAGTGAGGAAGTCGCT   |
| hSHH(R244A)      | CACTTTCTGGACGCCGACGACGGCGCC        | GGCGCCGTCGTCGGCGTCCAGGAAAGTG       |
| hSHH(K249A)      | GCGACGACGGCGCCGCGAAGGTCTTCTACG     | CGTAGAAGACCTTCGCGGGCGCCGTCGTCGC    |
| hSHH(K250A)      | CGACGACGGCGCCAAGGCGGTCTTCTACGTGATC | GATCACGTAGAAGACCGCCTTGCGGCCGTCGTCG |
| hSHH(F252A)      | CGGCGCCAAGAAGGTCGCCTACGTGATCGAGACG | CGTCTCGATCACGTAGGCGACCTTCTTGCGCCG  |
| hSHH(L348A)      | GCCTACGCGCCGGCCACGGCCCAGGG         | CCCTGGGCCGTGGCCGGCGCGTAGGC         |
| hSHH(L348E)      | GCCTACGCGCCGGAGACGGCCCAGGGG        | GCCCTGGGCCGTCTCCGGCGCGTAGGC        |
| hSHH(F305A)      | CCTCGGGCGCTGGCCGCCAGCCGCGT         | ACGCGGCTGGCGGCCAGCGCCCAGG          |
| hSHH(Y345A)      | CCGCGGGCGCCGCCGCGCCGCTCA           | TGAGCGGCGCGGCCGCGCCCAGG            |
| hSHH(Y364A)      | GCTGGCCTCGTGCGCCGCGGTCATCGAG       | CTCGATGACCGCGGCCGACGAGGCCAGC       |
